# Supplementary material
Source: publisher figshare collection journal article supplement (https://acs.figshare.com/ndownloader/files/3910006)
Supplement: Supplementary file 1 [file 3910006]

data_cmpd1b

_audit_creation_method            'SHELXL-97 & ZCIF'
_chemical_name_systematic
;
cmpd1b
;
_chemical_name_common             cmpd1b
_chemical_formula_moiety          'C46 H68 N6 Ta2'
_chemical_formula_sum             'C46 H68 N6 Ta2'
_chemical_formula_weight          1066.96

loop_
 _atom_type_symbol
 _atom_type_description
 _atom_type_scat_dispersion_real
 _atom_type_scat_dispersion_imag
 _atom_type_scat_source
 'C'  'C'   0.0033   0.0016
 'International Tables Vol C Tables 4.2.6.8 and 6.1.1.4'
 'H'  'H'   0.0000   0.0000
 'International Tables Vol C Tables 4.2.6.8 and 6.1.1.4'
 'N'  'N'   0.0061   0.0033
 'International Tables Vol C Tables 4.2.6.8 and 6.1.1.4'
 'Ta'  'Ta'  -0.7052   6.5227
 'International Tables Vol C Tables 4.2.6.8 and 6.1.1.4'

_symmetry_cell_setting            Monoclinic
_symmetry_space_group_name_H-M    'P21/c'

loop_
 _symmetry_equiv_pos_as_xyz
 'x, y, z'
 '-x, y+1/2, -z+1/2'
 '-x, -y, -z'
 'x, -y-1/2, z-1/2'

_cell_length_a                    11.6870(8)
_cell_length_b                    16.2027(11)
_cell_length_c                    25.0686(17)
_cell_angle_alpha                 90.00
_cell_angle_beta                  101.8262(10)
_cell_angle_gamma                 90.00
_cell_volume                      4646.3(5)
_cell_formula_units_Z             4
_cell_measurement_temperature     150(2)
_cell_measurement_reflns_used     31145
_cell_measurement_theta_min       2.5
_cell_measurement_theta_max       32.0

_exptl_crystal_description        plate
_exptl_crystal_colour             dark-purple #black
_exptl_crystal_size_max           0.475
_exptl_crystal_size_mid           0.30
_exptl_crystal_size_min           0.065
_exptl_crystal_density_meas       ?
_exptl_crystal_density_diffrn     1.525
_exptl_crystal_density_method     'not measured'
_exptl_crystal_F_000              2128
_exptl_absorpt_coefficient_mu     4.743
_exptl_absorpt_correction_type    integration
_exptl_absorpt_correction_T_min   0.149
_exptl_absorpt_correction_T_max   0.735
_exptl_absorpt_process_details    'SADABS (Sheldrick, 2008)'

_diffrn_ambient_temperature       150(2)
_diffrn_radiation_wavelength      0.71073
_diffrn_radiation_type            MoK\a
_diffrn_radiation_source          'fine-focus sealed tube'
_diffrn_radiation_monochromator   graphite
_diffrn_measurement_device_type   'three-circle diffractometer'
_diffrn_measurement_method        '\f and \w scans'
_diffrn_detector_area_resol_mean  11.198
_diffrn_reflns_number             68758
_diffrn_reflns_av_R_equivalents   0.0236
_diffrn_reflns_av_sigmaI/netI     0.0178
_diffrn_reflns_limit_h_min        -16
_diffrn_reflns_limit_h_max        16
_diffrn_reflns_limit_k_min        -22
_diffrn_reflns_limit_k_max        22
_diffrn_reflns_limit_l_min        -35
_diffrn_reflns_limit_l_max        35
_diffrn_reflns_theta_min          2.08
_diffrn_reflns_theta_max          30.00
_reflns_number_total              13539
_reflns_number_gt                 11810
_reflns_threshold_expression      >2sigma(I)

_computing_data_collection        'Apex2 (Bruker, 2005)'
_computing_cell_refinement        Apex2
_computing_data_reduction         Apex2
_computing_structure_solution     'SHELXS-97 (Sheldrick, 2008)'
_computing_structure_refinement   'SHELXL-97 (Sheldrick, 2008)'
_computing_molecular_graphics     'XSHEL (Bruker, 2004)'
_computing_publication_material   SHELXL-97

_refine_special_details
;
 Refinement of F^2^ against ALL reflections.  The weighted R-factor wR and
 goodness of fit S are based on F^2^, conventional R-factors R are based
 on F, with F set to zero for negative F^2^. The threshold expression of
 F^2^ > 2sigma(F^2^) is used only for calculating R-factors(gt) etc. and is
 not relevant to the choice of reflections for refinement.  R-factors based
 on F^2^ are statistically about twice as large as those based on F, and R-
 factors based on ALL data will be even larger.
;

_refine_ls_structure_factor_coef  Fsqd
_refine_ls_matrix_type            full
_refine_ls_weighting_scheme       calc
_refine_ls_weighting_details
'w=1/[\s^2^(Fo^2^)+(0.01P)^2^+6.39P], P=(max(Fo^2^,0)+2Fc^2^)/3'
_atom_sites_solution_primary      direct
_atom_sites_solution_secondary    difmap
_atom_sites_solution_hydrogens    geom
_refine_ls_hydrogen_treatment     constr
_refine_ls_extinction_method      none
_refine_ls_extinction_coef        ?
_refine_ls_number_reflns          13539
_refine_ls_number_parameters      516
_refine_ls_number_restraints      45
_refine_ls_R_factor_all           0.0267
_refine_ls_R_factor_gt            0.0206
_refine_ls_wR_factor_ref          0.0420
_refine_ls_wR_factor_gt           0.0405
_refine_ls_goodness_of_fit_ref    1.002
_refine_ls_restrained_S_all       1.005
_refine_ls_shift/su_max           0.004
_refine_ls_shift/su_mean          0.000

loop_
 _atom_site_label
 _atom_site_type_symbol
 _atom_site_fract_x
 _atom_site_fract_y
 _atom_site_fract_z
 _atom_site_U_iso_or_equiv
 _atom_site_adp_type
 _atom_site_occupancy
 _atom_site_symmetry_multiplicity
 _atom_site_calc_flag
 _atom_site_refinement_flags
 _atom_site_disorder_assembly
 _atom_site_disorder_group
Ta1 Ta 0.334681(7) 0.574222(5) 0.667751(3) 0.02139(2) Uani 1 1 d . A .
Ta2 Ta 0.210575(8) 0.565667(5) 0.843688(4) 0.02448(2) Uani 1 1 d . B .
N1 N 0.28162(15) 0.57680(10) 0.73073(7) 0.0241(3) Uani 1 1 d . . .
N2 N 0.25100(15) 0.57908(10) 0.77807(7) 0.0243(3) Uani 1 1 d . . .
C1A C 0.15416(18) 0.63984(12) 0.60716(8) 0.0229(4) Uani 1 1 d . A .
C2A C 0.03448(18) 0.67752(13) 0.59490(9) 0.0262(4) Uani 1 1 d . . .
C3A C -0.0050(2) 0.71972(16) 0.54681(11) 0.0388(6) Uani 1 1 d . . .
H3A H 0.0431 0.7235 0.5206 0.047 Uiso 1 1 calc R . .
C4A C -0.1148(3) 0.75685(19) 0.53640(13) 0.0515(7) Uani 1 1 d . . .
H4A H -0.1416 0.7852 0.5030 0.062 Uiso 1 1 calc R . .
C5A C -0.1840(2) 0.75254(17) 0.57414(15) 0.0523(8) Uani 1 1 d . . .
H5A H -0.2588 0.7780 0.5671 0.063 Uiso 1 1 calc R . .
C6A C -0.1454(3) 0.7115(2) 0.62194(15) 0.0575(8) Uani 1 1 d . . .
H6A H -0.1936 0.7089 0.6481 0.069 Uiso 1 1 calc R . .
C7A C -0.0363(2) 0.67348(17) 0.63289(12) 0.0450(6) Uani 1 1 d . . .
H7A H -0.0105 0.6449 0.6663 0.054 Uiso 1 1 calc R . .
N1A N 0.25100(15) 0.68383(10) 0.62516(8) 0.0251(4) Uani 1 1 d . . .
C8A C 0.2443(2) 0.77164(13) 0.63935(10) 0.0308(5) Uani 0.773(14) 1 d PU A 1
H8A H 0.1622 0.7910 0.6259 0.037 Uiso 0.773(14) 1 calc PR A 1
C9A C 0.2755(6) 0.7824(3) 0.7022(2) 0.0445(12) Uani 0.773(14) 1 d PU A 1
H9A1 H 0.2249 0.7469 0.7190 0.067 Uiso 0.773(14) 1 calc PR A 1
H9A2 H 0.2638 0.8402 0.7115 0.067 Uiso 0.773(14) 1 calc PR A 1
H9A3 H 0.3574 0.7671 0.7158 0.067 Uiso 0.773(14) 1 calc PR A 1
C10A C 0.3240(6) 0.8225(3) 0.6127(3) 0.0566(17) Uani 0.773(14) 1 d PU A 1
H10A H 0.4042 0.8020 0.6237 0.085 Uiso 0.773(14) 1 calc PR A 1
H10B H 0.3209 0.8803 0.6239 0.085 Uiso 0.773(14) 1 calc PR A 1
H10C H 0.2989 0.8186 0.5730 0.085 Uiso 0.773(14) 1 calc PR A 1
C14A C 0.2443(2) 0.77164(13) 0.63935(10) 0.0308(5) Uani 0.227(14) 1 d P A 2
H14A H 0.1608 0.7857 0.6389 0.037 Uiso 0.227(14) 1 calc PR A 2
C15A C 0.3108(19) 0.7893(12) 0.6914(8) 0.0445(12) Uani 0.227(14) 1 d P A 2
H15A H 0.3204 0.7390 0.7135 0.067 Uiso 0.227(14) 1 calc PR A 2
H15B H 0.2706 0.8313 0.7089 0.067 Uiso 0.227(14) 1 calc PR A 2
H15C H 0.3878 0.8101 0.6880 0.067 Uiso 0.227(14) 1 calc PR A 2
C16A C 0.286(2) 0.8221(12) 0.5894(10) 0.0566(17) Uani 0.227(14) 1 d P A 2
H16A H 0.3056 0.8791 0.6008 0.085 Uiso 0.227(14) 1 calc PR A 2
H16B H 0.2225 0.8220 0.5572 0.085 Uiso 0.227(14) 1 calc PR A 2
H16C H 0.3550 0.7951 0.5807 0.085 Uiso 0.227(14) 1 calc PR A 2
N2A N 0.17574(15) 0.55904(10) 0.60491(8) 0.0253(4) Uani 1 1 d . . .
C11A C 0.08082(19) 0.49793(13) 0.59490(10) 0.0299(5) Uani 1 1 d . A .
H11A H 0.0062 0.5270 0.5789 0.036 Uiso 1 1 calc R . .
C12A C 0.0674(2) 0.45736(16) 0.64793(12) 0.0424(6) Uani 1 1 d . . .
H12A H 0.1390 0.4270 0.6635 0.064 Uiso 1 1 calc R A .
H12B H 0.0011 0.4191 0.6408 0.064 Uiso 1 1 calc R . .
H12C H 0.0536 0.4999 0.6737 0.064 Uiso 1 1 calc R . .
C13A C 0.1044(2) 0.43335(16) 0.55444(13) 0.0462(7) Uani 1 1 d . . .
H13A H 0.1767 0.4037 0.5699 0.069 Uiso 1 1 calc R A .
H13B H 0.1126 0.4605 0.5205 0.069 Uiso 1 1 calc R . .
H13C H 0.0391 0.3942 0.5469 0.069 Uiso 1 1 calc R . .
C20A C 0.52110(18) 0.52260(14) 0.70791(9) 0.0284(4) Uani 1 1 d . . .
C21A C 0.47203(19) 0.46307(13) 0.66794(9) 0.0279(4) Uani 1 1 d . A .
C22A C 0.46497(18) 0.49961(14) 0.61550(9) 0.0269(4) Uani 1 1 d . . .
C23A C 0.50552(18) 0.58156(14) 0.62288(10) 0.0290(4) Uani 1 1 d . A .
C24A C 0.53900(18) 0.59704(14) 0.68020(10) 0.0304(5) Uani 1 1 d . A .
C25A C 0.5556(2) 0.50848(19) 0.76831(10) 0.0446(6) Uani 1 1 d . A .
H25A H 0.6386 0.4938 0.7780 0.067 Uiso 1 1 calc R . .
H25B H 0.5087 0.4634 0.7788 0.067 Uiso 1 1 calc R . .
H25C H 0.5420 0.5590 0.7876 0.067 Uiso 1 1 calc R . .
C26A C 0.4494(2) 0.37381(14) 0.67854(12) 0.0398(6) Uani 1 1 d . . .
H26A H 0.3863 0.3530 0.6498 0.060 Uiso 1 1 calc R A .
H26B H 0.4267 0.3686 0.7139 0.060 Uiso 1 1 calc R . .
H26C H 0.5206 0.3417 0.6789 0.060 Uiso 1 1 calc R . .
C27A C 0.4307(2) 0.45479(17) 0.56224(10) 0.0384(6) Uani 1 1 d . A .
H27A H 0.4973 0.4226 0.5555 0.058 Uiso 1 1 calc R . .
H27B H 0.4071 0.4948 0.5327 0.058 Uiso 1 1 calc R . .
H27C H 0.3652 0.4176 0.5637 0.058 Uiso 1 1 calc R . .
C28A C 0.5136(2) 0.64155(16) 0.57783(11) 0.0418(6) Uani 1 1 d . . .
H28A H 0.4401 0.6410 0.5507 0.050 Uiso 1 1 calc R A .
H28B H 0.5780 0.6254 0.5604 0.050 Uiso 1 1 calc R . .
H28C H 0.5279 0.6972 0.5931 0.050 Uiso 1 1 calc R . .
C29A C 0.5999(2) 0.67290(17) 0.70672(13) 0.0489(7) Uani 1 1 d . . .
H29A H 0.5761 0.6830 0.7414 0.073 Uiso 1 1 calc R A .
H29B H 0.5786 0.7205 0.6826 0.073 Uiso 1 1 calc R . .
H29C H 0.6847 0.6646 0.7134 0.073 Uiso 1 1 calc R . .
C1B C 0.21181(19) 0.71563(13) 0.88181(9) 0.0274(4) Uani 1 1 d U B .
C2B C 0.22031(19) 0.80665(14) 0.89188(11) 0.0330(5) Uani 1 1 d U . .
C3B C 0.2338(2) 0.86147(16) 0.85158(13) 0.0449(6) Uani 1 1 d U . .
H3B H 0.2354 0.8428 0.8158 0.054 Uiso 1 1 calc R . .
C4B C 0.2454(2) 0.94719(19) 0.86502(17) 0.0595(8) Uani 1 1 d U . .
H4B H 0.2558 0.9866 0.8384 0.071 Uiso 1 1 calc R . .
C5B C 0.2413(2) 0.97186(19) 0.91739(17) 0.0610(9) Uani 1 1 d U . .
H5B H 0.2475 1.0290 0.9260 0.073 Uiso 1 1 calc R . .
C6B C 0.2288(2) 0.91771(19) 0.95691(16) 0.0577(8) Uani 1 1 d U . .
H6B H 0.2268 0.9365 0.9926 0.069 Uiso 1 1 calc R . .
C7B C 0.2191(2) 0.83513(17) 0.94449(12) 0.0435(6) Uani 1 1 d U . .
H7B H 0.2114 0.7966 0.9721 0.052 Uiso 1 1 calc R . .
N1B N 0.11393(16) 0.67571(11) 0.86019(8) 0.0299(4) Uani 1 1 d . . .
C8B C 0.0031(2) 0.71808(15) 0.84057(11) 0.0378(6) Uani 0.714(9) 1 d PU B 1
H8B H 0.0206 0.7766 0.8325 0.045 Uiso 0.714(9) 1 calc PR B 1
C9B C -0.0617(6) 0.6778(5) 0.7874(3) 0.078(2) Uani 0.714(9) 1 d PU B 1
H9B1 H -0.0295 0.6226 0.7839 0.117 Uiso 0.714(9) 1 calc PR B 1
H9B2 H -0.0519 0.7118 0.7563 0.117 Uiso 0.714(9) 1 calc PR B 1
H9B3 H -0.1450 0.6732 0.7880 0.117 Uiso 0.714(9) 1 calc PR B 1
C10B C -0.0698(4) 0.7184(4) 0.8843(3) 0.0578(13) Uani 0.714(9) 1 d PU B 1
H10D H -0.1426 0.7487 0.8711 0.087 Uiso 0.714(9) 1 calc PR B 1
H10E H -0.0257 0.7452 0.9172 0.087 Uiso 0.714(9) 1 calc PR B 1
H10F H -0.0880 0.6614 0.8929 0.087 Uiso 0.714(9) 1 calc PR B 1
C14B C 0.0031(2) 0.71808(15) 0.84057(11) 0.0378(6) Uani 0.286(9) 1 d P B 2
H14B H 0.0133 0.7782 0.8493 0.045 Uiso 0.286(9) 1 calc PR B 2
C15B C -0.0204(15) 0.7073(12) 0.7819(9) 0.078(2) Uani 0.286(9) 1 d P B 2
H15D H 0.0423 0.7329 0.7670 0.117 Uiso 0.286(9) 1 calc PR B 2
H15E H -0.0951 0.7335 0.7658 0.117 Uiso 0.286(9) 1 calc PR B 2
H15F H -0.0244 0.6483 0.7732 0.117 Uiso 0.286(9) 1 calc PR B 2
C16B C -0.0947(12) 0.6844(9) 0.8654(7) 0.0578(13) Uani 0.286(9) 1 d P B 2
H16D H -0.1084 0.6264 0.8551 0.087 Uiso 0.286(9) 1 calc PR B 2
H16E H -0.1661 0.7163 0.8521 0.087 Uiso 0.286(9) 1 calc PR B 2
H16F H -0.0730 0.6889 0.9052 0.087 Uiso 0.286(9) 1 calc PR B 2
N2B N 0.30440(16) 0.66604(11) 0.89287(8) 0.0285(4) Uani 1 1 d . . .
C11B C 0.4236(2) 0.69864(15) 0.90841(10) 0.0323(5) Uani 1 1 d . B .
H11B H 0.4206 0.7600 0.9039 0.039 Uiso 1 1 calc R . .
C12B C 0.4984(2) 0.66305(17) 0.87112(12) 0.0421(6) Uani 1 1 d . . .
H12D H 0.5030 0.6030 0.8755 0.063 Uiso 1 1 calc R B .
H12E H 0.5772 0.6866 0.8806 0.063 Uiso 1 1 calc R . .
H12F H 0.4634 0.6766 0.8332 0.063 Uiso 1 1 calc R . .
C13B C 0.4758(3) 0.6786(2) 0.96796(11) 0.0512(7) Uani 1 1 d . . .
H13D H 0.4276 0.7035 0.9914 0.077 Uiso 1 1 calc R B .
H13E H 0.5554 0.7007 0.9777 0.077 Uiso 1 1 calc R . .
H13F H 0.4778 0.6186 0.9731 0.077 Uiso 1 1 calc R . .
C20B C 0.2194(2) 0.42099(13) 0.83775(11) 0.0342(5) Uani 1 1 d . . .
C21B C 0.2924(2) 0.44454(14) 0.88809(11) 0.0351(5) Uani 1 1 d . B .
C22B C 0.2176(2) 0.47328(15) 0.92318(10) 0.0360(5) Uani 1 1 d . . .
C23B C 0.1020(2) 0.46951(15) 0.89387(11) 0.0372(6) Uani 1 1 d . B .
C24B C 0.1014(2) 0.43850(14) 0.84079(11) 0.0370(5) Uani 1 1 d . B .
C25B C 0.2590(3) 0.38164(15) 0.79038(12) 0.0469(7) Uani 1 1 d . B .
H25D H 0.2357 0.4164 0.7580 0.070 Uiso 1 1 calc R . .
H25E H 0.2228 0.3271 0.7834 0.070 Uiso 1 1 calc R . .
H25F H 0.3442 0.3758 0.7989 0.070 Uiso 1 1 calc R . .
C26B C 0.4215(2) 0.42890(18) 0.90415(13) 0.0499(7) Uani 1 1 d . . .
H26D H 0.4576 0.4382 0.8727 0.075 Uiso 1 1 calc R B .
H26E H 0.4351 0.3717 0.9166 0.075 Uiso 1 1 calc R . .
H26F H 0.4561 0.4666 0.9337 0.075 Uiso 1 1 calc R . .
C27B C 0.2562(3) 0.5003(2) 0.98139(12) 0.0543(8) Uani 1 1 d . B .
H27D H 0.3403 0.5115 0.9890 0.081 Uiso 1 1 calc R . .
H27E H 0.2394 0.4565 1.0056 0.081 Uiso 1 1 calc R . .
H27F H 0.2139 0.5505 0.9875 0.081 Uiso 1 1 calc R . .
C28B C -0.0051(3) 0.4880(2) 0.91650(14) 0.0574(8) Uani 1 1 d . . .
H28D H -0.0708 0.5005 0.8865 0.086 Uiso 1 1 calc R B .
H28E H 0.0103 0.5356 0.9410 0.086 Uiso 1 1 calc R . .
H28F H -0.0243 0.4399 0.9367 0.086 Uiso 1 1 calc R . .
C29B C -0.0039(3) 0.41577(18) 0.79795(14) 0.0547(8) Uani 1 1 d . . .
H29D H -0.0261 0.3585 0.8034 0.082 Uiso 1 1 calc R B .
H29E H 0.0147 0.4215 0.7618 0.082 Uiso 1 1 calc R . .
H29F H -0.0691 0.4525 0.8008 0.082 Uiso 1 1 calc R . .

loop_
 _atom_site_aniso_label
 _atom_site_aniso_U_11
 _atom_site_aniso_U_22
 _atom_site_aniso_U_33
 _atom_site_aniso_U_23
 _atom_site_aniso_U_13
 _atom_site_aniso_U_12
Ta1 0.01708(4) 0.02239(4) 0.02554(4) -0.00074(3) 0.00630(3) -0.00149(3)
Ta2 0.02733(4) 0.02137(4) 0.02637(5) 0.00317(3) 0.00930(3) 0.00412(3)
N1 0.0213(8) 0.0237(8) 0.0283(9) 0.0002(7) 0.0071(7) -0.0003(6)
N2 0.0248(8) 0.0214(8) 0.0273(9) 0.0009(7) 0.0070(7) 0.0014(6)
C1A 0.0220(9) 0.0244(9) 0.0228(10) 0.0001(8) 0.0057(8) -0.0018(7)
C2A 0.0210(10) 0.0251(9) 0.0332(12) -0.0072(8) 0.0072(8) -0.0024(8)
C3A 0.0336(13) 0.0442(14) 0.0385(14) -0.0013(11) 0.0066(10) 0.0094(11)
C4A 0.0407(15) 0.0517(16) 0.0554(18) -0.0057(14) -0.0056(13) 0.0174(13)
C5A 0.0286(13) 0.0412(14) 0.086(2) -0.0201(15) 0.0088(14) 0.0076(11)
C6A 0.0419(16) 0.0557(18) 0.086(2) -0.0103(17) 0.0381(17) 0.0036(14)
C7A 0.0423(15) 0.0472(15) 0.0524(17) 0.0022(13) 0.0259(13) 0.0059(12)
N1A 0.0219(8) 0.0214(8) 0.0323(10) -0.0011(7) 0.0061(7) -0.0032(6)
C8A 0.0272(11) 0.0206(9) 0.0455(14) -0.0044(9) 0.0094(10) -0.0039(8)
C9A 0.052(3) 0.0360(16) 0.045(2) -0.0148(16) 0.0082(19) 0.0039(19)
C10A 0.078(4) 0.0276(13) 0.076(4) -0.008(2) 0.042(3) -0.019(2)
C14A 0.0272(11) 0.0206(9) 0.0455(14) -0.0044(9) 0.0094(10) -0.0039(8)
C15A 0.052(3) 0.0360(16) 0.045(2) -0.0148(16) 0.0082(19) 0.0039(19)
C16A 0.078(4) 0.0276(13) 0.076(4) -0.008(2) 0.042(3) -0.019(2)
N2A 0.0214(8) 0.0222(8) 0.0316(10) -0.0009(7) 0.0040(7) -0.0030(6)
C11A 0.0223(10) 0.0249(10) 0.0414(13) -0.0029(9) 0.0038(9) -0.0058(8)
C12A 0.0329(13) 0.0381(13) 0.0554(17) 0.0084(12) 0.0076(12) -0.0134(10)
C13A 0.0396(14) 0.0360(13) 0.0638(19) -0.0186(13) 0.0126(13) -0.0118(11)
C20A 0.0199(10) 0.0358(11) 0.0291(11) -0.0015(9) 0.0041(8) 0.0051(8)
C21A 0.0236(10) 0.0277(10) 0.0336(12) -0.0003(9) 0.0090(9) 0.0055(8)
C22A 0.0203(9) 0.0332(11) 0.0285(11) -0.0023(9) 0.0082(8) 0.0030(8)
C23A 0.0194(9) 0.0341(11) 0.0361(12) 0.0023(9) 0.0118(8) 0.0009(8)
C24A 0.0177(9) 0.0322(11) 0.0417(13) -0.0057(10) 0.0068(9) -0.0024(8)
C25A 0.0409(14) 0.0584(17) 0.0327(14) -0.0011(12) 0.0033(11) 0.0151(12)
C26A 0.0435(14) 0.0272(11) 0.0530(16) 0.0015(11) 0.0195(12) 0.0052(10)
C27A 0.0328(13) 0.0498(14) 0.0335(13) -0.0081(11) 0.0089(10) 0.0023(11)
C28A 0.0377(14) 0.0434(14) 0.0496(16) 0.0109(12) 0.0214(12) 0.0015(11)
C29A 0.0302(13) 0.0457(15) 0.071(2) -0.0180(14) 0.0106(13) -0.0120(11)
C1B 0.0292(11) 0.0289(10) 0.0261(11) -0.0027(8) 0.0104(9) 0.0047(8)
C2B 0.0223(10) 0.0296(10) 0.0480(14) -0.0072(9) 0.0097(10) 0.0036(8)
C3B 0.0314(13) 0.0377(12) 0.0691(18) 0.0078(12) 0.0184(13) 0.0062(10)
C4B 0.0274(13) 0.0453(15) 0.106(2) 0.0194(16) 0.0141(16) -0.0001(11)
C5B 0.0241(13) 0.0403(14) 0.116(3) -0.0250(15) 0.0093(16) -0.0002(11)
C6B 0.0320(14) 0.0518(16) 0.089(2) -0.0341(15) 0.0119(15) -0.0027(12)
C7B 0.0271(12) 0.0469(14) 0.0568(16) -0.0223(12) 0.0092(11) 0.0002(10)
N1B 0.0260(9) 0.0272(9) 0.0361(11) -0.0028(8) 0.0054(8) 0.0051(7)
C8B 0.0282(11) 0.0280(11) 0.0546(16) -0.0037(10) 0.0024(11) 0.0060(9)
C9B 0.054(4) 0.079(5) 0.081(3) -0.023(3) -0.034(3) 0.023(3)
C10B 0.039(2) 0.056(3) 0.084(4) -0.005(2) 0.025(2) 0.011(2)
C14B 0.0282(11) 0.0280(11) 0.0546(16) -0.0037(10) 0.0024(11) 0.0060(9)
C15B 0.054(4) 0.079(5) 0.081(3) -0.023(3) -0.034(3) 0.023(3)
C16B 0.039(2) 0.056(3) 0.084(4) -0.005(2) 0.025(2) 0.011(2)
N2B 0.0273(9) 0.0308(9) 0.0274(10) -0.0003(7) 0.0056(8) 0.0055(7)
C11B 0.0266(11) 0.0342(11) 0.0351(13) -0.0009(10) 0.0039(9) 0.0044(9)
C12B 0.0343(13) 0.0441(14) 0.0511(16) -0.0026(12) 0.0163(12) 0.0009(11)
C13B 0.0385(15) 0.074(2) 0.0368(15) -0.0003(14) -0.0029(12) 0.0017(14)
C20B 0.0439(14) 0.0195(9) 0.0431(14) 0.0074(9) 0.0182(11) 0.0052(9)
C21B 0.0382(13) 0.0296(11) 0.0406(14) 0.0144(10) 0.0154(11) 0.0089(9)
C22B 0.0437(14) 0.0326(11) 0.0354(13) 0.0120(10) 0.0164(11) 0.0053(10)
C23B 0.0383(13) 0.0309(11) 0.0475(15) 0.0117(10) 0.0208(11) 0.0041(10)
C24B 0.0381(13) 0.0278(11) 0.0469(15) 0.0074(10) 0.0127(11) -0.0024(9)
C25B 0.0655(19) 0.0251(11) 0.0562(18) 0.0000(11) 0.0265(15) 0.0052(11)
C26B 0.0434(15) 0.0521(16) 0.0566(18) 0.0255(14) 0.0159(13) 0.0174(13)
C27B 0.065(2) 0.0629(19) 0.0382(16) 0.0117(14) 0.0188(14) 0.0023(16)
C28B 0.0498(18) 0.0597(19) 0.074(2) 0.0155(16) 0.0386(17) 0.0065(14)
C29B 0.0493(17) 0.0444(15) 0.068(2) 0.0054(14) 0.0070(15) -0.0141(13)

_geom_special_details
;
 All esds (except the esd in the dihedral angle between two l.s. planes)
 are estimated using the full covariance matrix.  The cell esds are taken
 into account individually in the estimation of esds in distances, angles
 and torsion angles; correlations between esds in cell parameters are only
 used when they are defined by crystal symmetry.  An approximate (isotropic)
 treatment of cell esds is used for estimating esds involving l.s. planes.
;

loop_
 _geom_bond_atom_site_label_1
 _geom_bond_atom_site_label_2
 _geom_bond_distance
 _geom_bond_site_symmetry_2
 _geom_bond_publ_flag
Ta1 N1 1.8111(18) . ?
Ta1 N2A 2.1894(18) . ?
Ta1 N1A 2.1959(18) . ?
Ta1 C20A 2.358(2) . ?
Ta1 C24A 2.373(2) . ?
Ta1 C21A 2.412(2) . ?
Ta1 C23A 2.487(2) . ?
Ta1 C22A 2.513(2) . ?
Ta2 N2 1.8152(18) . ?
Ta2 N2B 2.1940(19) . ?
Ta2 N1B 2.1950(18) . ?
Ta2 C20B 2.352(2) . ?
Ta2 C21B 2.360(2) . ?
Ta2 C24B 2.417(2) . ?
Ta2 C22B 2.480(2) . ?
Ta2 C23B 2.505(2) . ?
N1 N2 1.308(2) . ?
C1A N1A 1.335(3) . ?
C1A N2A 1.337(3) . ?
C1A C2A 1.499(3) . ?
C2A C3A 1.381(3) . ?
C2A C7A 1.385(3) . ?
C3A C4A 1.392(4) . ?
C3A H3A 0.9500 . ?
C4A C5A 1.367(4) . ?
C4A H4A 0.9500 . ?
C5A C6A 1.364(5) . ?
C5A H5A 0.9500 . ?
C6A C7A 1.392(4) . ?
C6A H6A 0.9500 . ?
C7A H7A 0.9500 . ?
N1A C8A 1.473(3) . ?
C8A C10A 1.500(5) . ?
C8A C9A 1.554(6) . ?
C8A H8A 1.0000 . ?
C9A H9A1 0.9800 . ?
C9A H9A2 0.9800 . ?
C9A H9A3 0.9800 . ?
C10A H10A 0.9800 . ?
C10A H10B 0.9800 . ?
C10A H10C 0.9800 . ?
C15A H15A 0.9800 . ?
C15A H15B 0.9800 . ?
C15A H15C 0.9800 . ?
C16A H16A 0.9800 . ?
C16A H16B 0.9800 . ?
C16A H16C 0.9800 . ?
N2A C11A 1.470(3) . ?
C11A C12A 1.520(3) . ?
C11A C13A 1.521(3) . ?
C11A H11A 1.0000 . ?
C12A H12A 0.9800 . ?
C12A H12B 0.9800 . ?
C12A H12C 0.9800 . ?
C13A H13A 0.9800 . ?
C13A H13B 0.9800 . ?
C13A H13C 0.9800 . ?
C20A C21A 1.424(3) . ?
C20A C24A 1.429(3) . ?
C20A C25A 1.503(3) . ?
C21A C22A 1.429(3) . ?
C21A C26A 1.504(3) . ?
C22A C23A 1.409(3) . ?
C22A C27A 1.500(3) . ?
C23A C24A 1.432(3) . ?
C23A C28A 1.507(3) . ?
C24A C29A 1.505(3) . ?
C25A H25A 0.9800 . ?
C25A H25B 0.9800 . ?
C25A H25C 0.9800 . ?
C26A H26A 0.9800 . ?
C26A H26B 0.9800 . ?
C26A H26C 0.9800 . ?
C27A H27A 0.9800 . ?
C27A H27B 0.9800 . ?
C27A H27C 0.9800 . ?
C28A H28A 0.9800 . ?
C28A H28B 0.9800 . ?
C28A H28C 0.9800 . ?
C29A H29A 0.9800 . ?
C29A H29B 0.9800 . ?
C29A H29C 0.9800 . ?
C1B N1B 1.329(3) . ?
C1B N2B 1.331(3) . ?
C1B C2B 1.496(3) . ?
C2B C3B 1.379(4) . ?
C2B C7B 1.400(4) . ?
C3B C4B 1.429(4) . ?
C3B H3B 0.9500 . ?
C4B C5B 1.383(5) . ?
C4B H4B 0.9500 . ?
C5B C6B 1.353(5) . ?
C5B H5B 0.9500 . ?
C6B C7B 1.373(4) . ?
C6B H6B 0.9500 . ?
C7B H7B 0.9500 . ?
N1B C8B 1.459(3) . ?
C8B C10B 1.521(6) . ?
C8B C9B 1.538(7) . ?
C8B H8B 1.0000 . ?
C9B H9B1 0.9800 . ?
C9B H9B2 0.9800 . ?
C9B H9B3 0.9800 . ?
C10B H10D 0.9800 . ?
C10B H10E 0.9800 . ?
C10B H10F 0.9800 . ?
C15B H15D 0.9800 . ?
C15B H15E 0.9800 . ?
C15B H15F 0.9800 . ?
C16B H16D 0.9800 . ?
C16B H16E 0.9800 . ?
C16B H16F 0.9800 . ?
N2B C11B 1.466(3) . ?
C11B C12B 1.519(3) . ?
C11B C13B 1.528(4) . ?
C11B H11B 1.0000 . ?
C12B H12D 0.9800 . ?
C12B H12E 0.9800 . ?
C12B H12F 0.9800 . ?
C13B H13D 0.9800 . ?
C13B H13E 0.9800 . ?
C13B H13F 0.9800 . ?
C20B C21B 1.423(4) . ?
C20B C24B 1.425(4) . ?
C20B C25B 1.502(4) . ?
C21B C22B 1.439(3) . ?
C21B C26B 1.501(4) . ?
C22B C23B 1.401(4) . ?
C22B C27B 1.501(4) . ?
C23B C24B 1.421(4) . ?
C23B C28B 1.506(4) . ?
C24B C29B 1.504(4) . ?
C25B H25D 0.9800 . ?
C25B H25E 0.9800 . ?
C25B H25F 0.9800 . ?
C26B H26D 0.9800 . ?
C26B H26E 0.9800 . ?
C26B H26F 0.9800 . ?
C27B H27D 0.9800 . ?
C27B H27E 0.9800 . ?
C27B H27F 0.9800 . ?
C28B H28D 0.9800 . ?
C28B H28E 0.9800 . ?
C28B H28F 0.9800 . ?
C29B H29D 0.9800 . ?
C29B H29E 0.9800 . ?
C29B H29F 0.9800 . ?

loop_
 _geom_angle_atom_site_label_1
 _geom_angle_atom_site_label_2
 _geom_angle_atom_site_label_3
 _geom_angle
 _geom_angle_site_symmetry_1
 _geom_angle_site_symmetry_3
 _geom_angle_publ_flag
N1 Ta1 N2A 103.78(7) . . ?
N1 Ta1 N1A 101.96(7) . . ?
N2A Ta1 N1A 60.88(6) . . ?
N1 Ta1 C20A 95.02(8) . . ?
N2A Ta1 C20A 147.22(7) . . ?
N1A Ta1 C20A 140.79(7) . . ?
N1 Ta1 C24A 113.39(8) . . ?
N2A Ta1 C24A 142.62(8) . . ?
N1A Ta1 C24A 105.89(7) . . ?
C20A Ta1 C24A 35.15(8) . . ?
N1 Ta1 C21A 111.23(8) . . ?
N2A Ta1 C21A 112.57(7) . . ?
N1A Ta1 C21A 146.59(7) . . ?
C20A Ta1 C21A 34.71(8) . . ?
C24A Ta1 C21A 57.63(8) . . ?
N1 Ta1 C23A 147.47(8) . . ?
N2A Ta1 C23A 108.74(7) . . ?
N1A Ta1 C23A 93.45(7) . . ?
C20A Ta1 C23A 56.84(8) . . ?
C24A Ta1 C23A 34.16(8) . . ?
C21A Ta1 C23A 56.01(7) . . ?
N1 Ta1 C22A 144.88(7) . . ?
N2A Ta1 C22A 94.95(7) . . ?
N1A Ta1 C22A 113.12(7) . . ?
C20A Ta1 C22A 56.38(7) . . ?
C24A Ta1 C22A 56.11(7) . . ?
C21A Ta1 C22A 33.65(7) . . ?
C23A Ta1 C22A 32.74(7) . . ?
N2 Ta2 N2B 103.15(7) . . ?
N2 Ta2 N1B 108.25(7) . . ?
N2B Ta2 N1B 60.60(7) . . ?
N2 Ta2 C20B 92.24(8) . . ?
N2B Ta2 C20B 138.67(8) . . ?
N1B Ta2 C20B 148.47(8) . . ?
N2 Ta2 C21B 111.81(8) . . ?
N2B Ta2 C21B 104.12(8) . . ?
N1B Ta2 C21B 139.56(8) . . ?
C20B Ta2 C21B 35.15(9) . . ?
N2 Ta2 C24B 107.98(8) . . ?
N2B Ta2 C24B 148.09(8) . . ?
N1B Ta2 C24B 114.16(8) . . ?
C20B Ta2 C24B 34.75(8) . . ?
C21B Ta2 C24B 57.70(9) . . ?
N2 Ta2 C22B 145.94(8) . . ?
N2B Ta2 C22B 93.75(8) . . ?
N1B Ta2 C22B 105.81(8) . . ?
C20B Ta2 C22B 56.96(9) . . ?
C21B Ta2 C22B 34.47(8) . . ?
C24B Ta2 C22B 55.95(9) . . ?
N2 Ta2 C23B 141.47(8) . . ?
N2B Ta2 C23B 115.16(8) . . ?
N1B Ta2 C23B 94.44(8) . . ?
C20B Ta2 C23B 56.31(8) . . ?
C21B Ta2 C23B 56.21(8) . . ?
C24B Ta2 C23B 33.50(9) . . ?
C22B Ta2 C23B 32.64(9) . . ?
N2 N1 Ta1 175.93(15) . . ?
N1 N2 Ta2 171.47(14) . . ?
N1A C1A N2A 112.51(18) . . ?
N1A C1A C2A 122.86(18) . . ?
N2A C1A C2A 124.50(18) . . ?
C3A C2A C7A 119.0(2) . . ?
C3A C2A C1A 120.8(2) . . ?
C7A C2A C1A 120.2(2) . . ?
C2A C3A C4A 120.5(3) . . ?
C2A C3A H3A 119.8 . . ?
C4A C3A H3A 119.8 . . ?
C5A C4A C3A 120.1(3) . . ?
C5A C4A H4A 119.9 . . ?
C3A C4A H4A 119.9 . . ?
C6A C5A C4A 119.8(3) . . ?
C6A C5A H5A 120.1 . . ?
C4A C5A H5A 120.1 . . ?
C5A C6A C7A 120.9(3) . . ?
C5A C6A H6A 119.5 . . ?
C7A C6A H6A 119.5 . . ?
C2A C7A C6A 119.7(3) . . ?
C2A C7A H7A 120.2 . . ?
C6A C7A H7A 120.2 . . ?
C1A N1A C8A 120.93(18) . . ?
C1A N1A Ta1 89.71(12) . . ?
C8A N1A Ta1 134.78(15) . . ?
N1A C8A C10A 110.8(3) . . ?
N1A C8A C9A 109.9(2) . . ?
C10A C8A C9A 110.7(3) . . ?
N1A C8A H8A 108.5 . . ?
C10A C8A H8A 108.5 . . ?
C9A C8A H8A 108.5 . . ?
C8A C9A H9A1 109.5 . . ?
C8A C9A H9A2 109.5 . . ?
H9A1 C9A H9A2 109.5 . . ?
C8A C9A H9A3 109.5 . . ?
H9A1 C9A H9A3 109.5 . . ?
H9A2 C9A H9A3 109.5 . . ?
C8A C10A H10A 109.5 . . ?
C8A C10A H10B 109.5 . . ?
H10A C10A H10B 109.5 . . ?
C8A C10A H10C 109.5 . . ?
H10A C10A H10C 109.5 . . ?
H10B C10A H10C 109.5 . . ?
H15A C15A H15B 109.5 . . ?
H15A C15A H15C 109.5 . . ?
H15B C15A H15C 109.5 . . ?
H16A C16A H16B 109.5 . . ?
H16A C16A H16C 109.5 . . ?
H16B C16A H16C 109.5 . . ?
C1A N2A C11A 121.65(18) . . ?
C1A N2A Ta1 89.95(12) . . ?
C11A N2A Ta1 134.26(14) . . ?
N2A C11A C12A 110.58(19) . . ?
N2A C11A C13A 110.11(19) . . ?
C12A C11A C13A 110.5(2) . . ?
N2A C11A H11A 108.5 . . ?
C12A C11A H11A 108.5 . . ?
C13A C11A H11A 108.5 . . ?
C11A C12A H12A 109.5 . . ?
C11A C12A H12B 109.5 . . ?
H12A C12A H12B 109.5 . . ?
C11A C12A H12C 109.5 . . ?
H12A C12A H12C 109.5 . . ?
H12B C12A H12C 109.5 . . ?
C11A C13A H13A 109.5 . . ?
C11A C13A H13B 109.5 . . ?
H13A C13A H13B 109.5 . . ?
C11A C13A H13C 109.5 . . ?
H13A C13A H13C 109.5 . . ?
H13B C13A H13C 109.5 . . ?
C21A C20A C24A 107.9(2) . . ?
C21A C20A C25A 126.3(2) . . ?
C24A C20A C25A 125.6(2) . . ?
C21A C20A Ta1 74.71(12) . . ?
C24A C20A Ta1 72.99(12) . . ?
C25A C20A Ta1 121.20(16) . . ?
C20A C21A C22A 107.8(2) . . ?
C20A C21A C26A 126.0(2) . . ?
C22A C21A C26A 125.6(2) . . ?
C20A C21A Ta1 70.58(12) . . ?
C22A C21A Ta1 77.05(12) . . ?
C26A C21A Ta1 125.27(15) . . ?
C23A C22A C21A 108.4(2) . . ?
C23A C22A C27A 126.5(2) . . ?
C21A C22A C27A 124.9(2) . . ?
C23A C22A Ta1 72.64(12) . . ?
C21A C22A Ta1 69.30(12) . . ?
C27A C22A Ta1 128.08(15) . . ?
C22A C23A C24A 108.2(2) . . ?
C22A C23A C28A 125.5(2) . . ?
C24A C23A C28A 126.3(2) . . ?
C22A C23A Ta1 74.63(12) . . ?
C24A C23A Ta1 68.54(12) . . ?
C28A C23A Ta1 123.29(15) . . ?
C20A C24A C23A 107.64(19) . . ?
C20A C24A C29A 125.3(2) . . ?
C23A C24A C29A 126.4(2) . . ?
C20A C24A Ta1 71.86(12) . . ?
C23A C24A Ta1 77.29(12) . . ?
C29A C24A Ta1 123.88(16) . . ?
C20A C25A H25A 109.5 . . ?
C20A C25A H25B 109.5 . . ?
H25A C25A H25B 109.5 . . ?
C20A C25A H25C 109.5 . . ?
H25A C25A H25C 109.5 . . ?
H25B C25A H25C 109.5 . . ?
C21A C26A H26A 109.5 . . ?
C21A C26A H26B 109.5 . . ?
H26A C26A H26B 109.5 . . ?
C21A C26A H26C 109.5 . . ?
H26A C26A H26C 109.5 . . ?
H26B C26A H26C 109.5 . . ?
C22A C27A H27A 109.5 . . ?
C22A C27A H27B 109.5 . . ?
H27A C27A H27B 109.5 . . ?
C22A C27A H27C 109.5 . . ?
H27A C27A H27C 109.5 . . ?
H27B C27A H27C 109.5 . . ?
C23A C28A H28A 109.5 . . ?
C23A C28A H28B 109.5 . . ?
H28A C28A H28B 109.5 . . ?
C23A C28A H28C 109.5 . . ?
H28A C28A H28C 109.5 . . ?
H28B C28A H28C 109.5 . . ?
C24A C29A H29A 109.5 . . ?
C24A C29A H29B 109.5 . . ?
H29A C29A H29B 109.5 . . ?
C24A C29A H29C 109.5 . . ?
H29A C29A H29C 109.5 . . ?
H29B C29A H29C 109.5 . . ?
N1B C1B N2B 112.73(19) . . ?
N1B C1B C2B 124.8(2) . . ?
N2B C1B C2B 122.5(2) . . ?
C3B C2B C7B 120.2(2) . . ?
C3B C2B C1B 121.7(2) . . ?
C7B C2B C1B 118.1(2) . . ?
C2B C3B C4B 118.2(3) . . ?
C2B C3B H3B 120.9 . . ?
C4B C3B H3B 120.9 . . ?
C5B C4B C3B 119.0(3) . . ?
C5B C4B H4B 120.5 . . ?
C3B C4B H4B 120.5 . . ?
C6B C5B C4B 122.5(3) . . ?
C6B C5B H5B 118.7 . . ?
C4B C5B H5B 118.7 . . ?
C5B C6B C7B 118.8(3) . . ?
C5B C6B H6B 120.6 . . ?
C7B C6B H6B 120.6 . . ?
C6B C7B C2B 121.2(3) . . ?
C6B C7B H7B 119.4 . . ?
C2B C7B H7B 119.4 . . ?
C1B N1B C8B 122.60(19) . . ?
C1B N1B Ta2 92.24(13) . . ?
C8B N1B Ta2 140.72(16) . . ?
N1B C8B C10B 110.4(3) . . ?
N1B C8B C9B 109.8(3) . . ?
C10B C8B C9B 112.2(4) . . ?
N1B C8B H8B 108.1 . . ?
C10B C8B H8B 108.1 . . ?
C9B C8B H8B 108.1 . . ?
C8B C9B H9B1 109.5 . . ?
C8B C9B H9B2 109.5 . . ?
H9B1 C9B H9B2 109.5 . . ?
C8B C9B H9B3 109.5 . . ?
H9B1 C9B H9B3 109.5 . . ?
H9B2 C9B H9B3 109.5 . . ?
H15D C15B H15E 109.5 . . ?
H15D C15B H15F 109.5 . . ?
H15E C15B H15F 109.5 . . ?
H16D C16B H16E 109.5 . . ?
H16D C16B H16F 109.5 . . ?
H16E C16B H16F 109.5 . . ?
C1B N2B C11B 121.72(19) . . ?
C1B N2B Ta2 92.24(14) . . ?
C11B N2B Ta2 139.00(14) . . ?
N2B C11B C12B 109.6(2) . . ?
N2B C11B C13B 110.5(2) . . ?
C12B C11B C13B 110.8(2) . . ?
N2B C11B H11B 108.6 . . ?
C12B C11B H11B 108.6 . . ?
C13B C11B H11B 108.6 . . ?
C11B C12B H12D 109.5 . . ?
C11B C12B H12E 109.5 . . ?
H12D C12B H12E 109.5 . . ?
C11B C12B H12F 109.5 . . ?
H12D C12B H12F 109.5 . . ?
H12E C12B H12F 109.5 . . ?
C11B C13B H13D 109.5 . . ?
C11B C13B H13E 109.5 . . ?
H13D C13B H13E 109.5 . . ?
C11B C13B H13F 109.5 . . ?
H13D C13B H13F 109.5 . . ?
H13E C13B H13F 109.5 . . ?
C21B C20B C24B 108.1(2) . . ?
C21B C20B C25B 126.1(2) . . ?
C24B C20B C25B 125.8(3) . . ?
C21B C20B Ta2 72.71(13) . . ?
C24B C20B Ta2 75.10(13) . . ?
C25B C20B Ta2 119.85(16) . . ?
C20B C21B C22B 107.5(2) . . ?
C20B C21B C26B 125.4(2) . . ?
C22B C21B C26B 126.4(3) . . ?
C20B C21B Ta2 72.13(12) . . ?
C22B C21B Ta2 77.35(13) . . ?
C26B C21B Ta2 123.69(17) . . ?
C23B C22B C21B 107.9(2) . . ?
C23B C22B C27B 126.0(2) . . ?
C21B C22B C27B 126.2(3) . . ?
C23B C22B Ta2 74.64(14) . . ?
C21B C22B Ta2 68.19(12) . . ?
C27B C22B Ta2 123.97(18) . . ?
C22B C23B C24B 109.0(2) . . ?
C22B C23B C28B 125.5(3) . . ?
C24B C23B C28B 125.3(3) . . ?
C22B C23B Ta2 72.72(13) . . ?
C24B C23B Ta2 69.86(13) . . ?
C28B C23B Ta2 127.66(18) . . ?
C23B C24B C20B 107.5(2) . . ?
C23B C24B C29B 127.0(3) . . ?
C20B C24B C29B 124.9(3) . . ?
C23B C24B Ta2 76.64(14) . . ?
C20B C24B Ta2 70.15(13) . . ?
C29B C24B Ta2 125.46(18) . . ?
C20B C25B H25D 109.5 . . ?
C20B C25B H25E 109.5 . . ?
H25D C25B H25E 109.5 . . ?
C20B C25B H25F 109.5 . . ?
H25D C25B H25F 109.5 . . ?
H25E C25B H25F 109.5 . . ?
C21B C26B H26D 109.5 . . ?
C21B C26B H26E 109.5 . . ?
H26D C26B H26E 109.5 . . ?
C21B C26B H26F 109.5 . . ?
H26D C26B H26F 109.5 . . ?
H26E C26B H26F 109.5 . . ?
C22B C27B H27D 109.5 . . ?
C22B C27B H27E 109.5 . . ?
H27D C27B H27E 109.5 . . ?
C22B C27B H27F 109.5 . . ?
H27D C27B H27F 109.5 . . ?
H27E C27B H27F 109.5 . . ?
C23B C28B H28D 109.5 . . ?
C23B C28B H28E 109.5 . . ?
H28D C28B H28E 109.5 . . ?
C23B C28B H28F 109.5 . . ?
H28D C28B H28F 109.5 . . ?
H28E C28B H28F 109.5 . . ?
C24B C29B H29D 109.5 . . ?
C24B C29B H29E 109.5 . . ?
H29D C29B H29E 109.5 . . ?
C24B C29B H29F 109.5 . . ?
H29D C29B H29F 109.5 . . ?
H29E C29B H29F 109.5 . . ?

loop_
 _geom_torsion_atom_site_label_1
 _geom_torsion_atom_site_label_2
 _geom_torsion_atom_site_label_3
 _geom_torsion_atom_site_label_4
 _geom_torsion
 _geom_torsion_site_symmetry_1
 _geom_torsion_site_symmetry_2
 _geom_torsion_site_symmetry_3
 _geom_torsion_site_symmetry_4
 _geom_torsion_publ_flag
N1A C1A C2A C3A 78.9(3) . . . . ?
N2A C1A C2A C3A -105.6(3) . . . . ?
N1A C1A C2A C7A -98.2(3) . . . . ?
N2A C1A C2A C7A 77.2(3) . . . . ?
C7A C2A C3A C4A -0.7(4) . . . . ?
C1A C2A C3A C4A -177.9(2) . . . . ?
C2A C3A C4A C5A 0.7(4) . . . . ?
C3A C4A C5A C6A -0.2(5) . . . . ?
C4A C5A C6A C7A -0.3(5) . . . . ?
C3A C2A C7A C6A 0.2(4) . . . . ?
C1A C2A C7A C6A 177.4(2) . . . . ?
C5A C6A C7A C2A 0.3(5) . . . . ?
N2A C1A N1A C8A -169.69(19) . . . . ?
C2A C1A N1A C8A 6.2(3) . . . . ?
N2A C1A N1A Ta1 -24.79(18) . . . . ?
C2A C1A N1A Ta1 151.14(18) . . . . ?
N1 Ta1 N1A C1A -83.54(13) . . . . ?
N2A Ta1 N1A C1A 15.71(12) . . . . ?
C20A Ta1 N1A C1A 162.81(12) . . . . ?
C24A Ta1 N1A C1A 157.63(12) . . . . ?
C21A Ta1 N1A C1A 103.03(16) . . . . ?
C23A Ta1 N1A C1A 125.27(13) . . . . ?
C22A Ta1 N1A C1A 98.21(13) . . . . ?
N1 Ta1 N1A C8A 52.4(2) . . . . ?
N2A Ta1 N1A C8A 151.7(2) . . . . ?
C20A Ta1 N1A C8A -61.2(2) . . . . ?
C24A Ta1 N1A C8A -66.4(2) . . . . ?
C21A Ta1 N1A C8A -121.0(2) . . . . ?
C23A Ta1 N1A C8A -98.8(2) . . . . ?
C22A Ta1 N1A C8A -125.81(19) . . . . ?
C1A N1A C8A C10A -130.5(4) . . . . ?
Ta1 N1A C8A C10A 103.6(4) . . . . ?
C1A N1A C8A C9A 106.9(3) . . . . ?
Ta1 N1A C8A C9A -19.0(4) . . . . ?
N1A C1A N2A C11A 169.89(19) . . . . ?
C2A C1A N2A C11A -6.0(3) . . . . ?
N1A C1A N2A Ta1 24.87(18) . . . . ?
C2A C1A N2A Ta1 -150.98(19) . . . . ?
N1 Ta1 N2A C1A 80.48(13) . . . . ?
N1A Ta1 N2A C1A -15.69(12) . . . . ?
C20A Ta1 N2A C1A -156.33(14) . . . . ?
C24A Ta1 N2A C1A -93.41(16) . . . . ?
C21A Ta1 N2A C1A -159.14(12) . . . . ?
C23A Ta1 N2A C1A -99.02(13) . . . . ?
C22A Ta1 N2A C1A -129.46(13) . . . . ?
N1 Ta1 N2A C11A -56.6(2) . . . . ?
N1A Ta1 N2A C11A -152.7(2) . . . . ?
C20A Ta1 N2A C11A 66.6(3) . . . . ?
C24A Ta1 N2A C11A 129.5(2) . . . . ?
C21A Ta1 N2A C11A 63.8(2) . . . . ?
C23A Ta1 N2A C11A 123.93(19) . . . . ?
C22A Ta1 N2A C11A 93.5(2) . . . . ?
C1A N2A C11A C12A -100.7(2) . . . . ?
Ta1 N2A C11A C12A 26.1(3) . . . . ?
C1A N2A C11A C13A 136.8(2) . . . . ?
Ta1 N2A C11A C13A -96.3(2) . . . . ?
N1 Ta1 C20A C21A 120.77(13) . . . . ?
N2A Ta1 C20A C21A -4.5(2) . . . . ?
N1A Ta1 C20A C21A -123.33(14) . . . . ?
C24A Ta1 C20A C21A -114.66(19) . . . . ?
C23A Ta1 C20A C21A -76.74(14) . . . . ?
C22A Ta1 C20A C21A -37.29(12) . . . . ?
N1 Ta1 C20A C24A -124.57(14) . . . . ?
N2A Ta1 C20A C24A 110.12(16) . . . . ?
N1A Ta1 C20A C24A -8.67(19) . . . . ?
C21A Ta1 C20A C24A 114.66(19) . . . . ?
C23A Ta1 C20A C24A 37.92(13) . . . . ?
C22A Ta1 C20A C24A 77.37(14) . . . . ?
N1 Ta1 C20A C25A -2.7(2) . . . . ?
N2A Ta1 C20A C25A -128.1(2) . . . . ?
N1A Ta1 C20A C25A 113.1(2) . . . . ?
C24A Ta1 C20A C25A 121.8(3) . . . . ?
C21A Ta1 C20A C25A -123.5(3) . . . . ?
C23A Ta1 C20A C25A 159.7(2) . . . . ?
C22A Ta1 C20A C25A -160.8(2) . . . . ?
C24A C20A C21A C22A 2.7(2) . . . . ?
C25A C20A C21A C22A -173.5(2) . . . . ?
Ta1 C20A C21A C22A 68.72(15) . . . . ?
C24A C20A C21A C26A 174.0(2) . . . . ?
C25A C20A C21A C26A -2.3(4) . . . . ?
Ta1 C20A C21A C26A -120.0(2) . . . . ?
C24A C20A C21A Ta1 -65.98(15) . . . . ?
C25A C20A C21A Ta1 117.7(2) . . . . ?
N1 Ta1 C21A C20A -66.67(14) . . . . ?
N2A Ta1 C21A C20A 177.34(13) . . . . ?
N1A Ta1 C21A C20A 106.43(16) . . . . ?
C24A Ta1 C21A C20A 38.27(13) . . . . ?
C23A Ta1 C21A C20A 79.32(14) . . . . ?
C22A Ta1 C21A C20A 114.44(19) . . . . ?
N1 Ta1 C21A C22A 178.89(12) . . . . ?
N2A Ta1 C21A C22A 62.90(14) . . . . ?
N1A Ta1 C21A C22A -8.0(2) . . . . ?
C20A Ta1 C21A C22A -114.44(19) . . . . ?
C24A Ta1 C21A C22A -76.17(14) . . . . ?
C23A Ta1 C21A C22A -35.12(12) . . . . ?
N1 Ta1 C21A C26A 54.2(2) . . . . ?
N2A Ta1 C21A C26A -61.8(2) . . . . ?
N1A Ta1 C21A C26A -132.69(19) . . . . ?
C20A Ta1 C21A C26A 120.9(3) . . . . ?
C24A Ta1 C21A C26A 159.2(2) . . . . ?
C23A Ta1 C21A C26A -159.8(2) . . . . ?
C22A Ta1 C21A C26A -124.7(3) . . . . ?
C20A C21A C22A C23A -1.9(2) . . . . ?
C26A C21A C22A C23A -173.2(2) . . . . ?
Ta1 C21A C22A C23A 62.51(15) . . . . ?
C20A C21A C22A C27A 172.9(2) . . . . ?
C26A C21A C22A C27A 1.6(3) . . . . ?
Ta1 C21A C22A C27A -122.7(2) . . . . ?
C20A C21A C22A Ta1 -64.39(14) . . . . ?
C26A C21A C22A Ta1 124.3(2) . . . . ?
N1 Ta1 C22A C23A -119.91(16) . . . . ?
N2A Ta1 C22A C23A 117.49(13) . . . . ?
N1A Ta1 C22A C23A 57.11(14) . . . . ?
C20A Ta1 C22A C23A -79.60(14) . . . . ?
C24A Ta1 C22A C23A -37.02(13) . . . . ?
C21A Ta1 C22A C23A -118.11(19) . . . . ?
N1 Ta1 C22A C21A -1.8(2) . . . . ?
N2A Ta1 C22A C21A -124.40(13) . . . . ?
N1A Ta1 C22A C21A 175.21(12) . . . . ?
C20A Ta1 C22A C21A 38.50(13) . . . . ?
C24A Ta1 C22A C21A 81.09(14) . . . . ?
C23A Ta1 C22A C21A 118.11(19) . . . . ?
N1 Ta1 C22A C27A 117.0(2) . . . . ?
N2A Ta1 C22A C27A -5.6(2) . . . . ?
N1A Ta1 C22A C27A -66.0(2) . . . . ?
C20A Ta1 C22A C27A 157.3(2) . . . . ?
C24A Ta1 C22A C27A -160.1(2) . . . . ?
C21A Ta1 C22A C27A 118.8(3) . . . . ?
C23A Ta1 C22A C27A -123.1(3) . . . . ?
C21A C22A C23A C24A 0.3(2) . . . . ?
C27A C22A C23A C24A -174.4(2) . . . . ?
Ta1 C22A C23A C24A 60.68(14) . . . . ?
C21A C22A C23A C28A 179.4(2) . . . . ?
C27A C22A C23A C28A 4.7(4) . . . . ?
Ta1 C22A C23A C28A -120.2(2) . . . . ?
C21A C22A C23A Ta1 -60.39(15) . . . . ?
C27A C22A C23A Ta1 124.9(2) . . . . ?
N1 Ta1 C23A C22A 111.95(17) . . . . ?
N2A Ta1 C23A C22A -68.94(14) . . . . ?
N1A Ta1 C23A C22A -129.32(13) . . . . ?
C20A Ta1 C23A C22A 78.07(14) . . . . ?
C24A Ta1 C23A C22A 117.13(19) . . . . ?
C21A Ta1 C23A C22A 36.12(13) . . . . ?
N1 Ta1 C23A C24A -5.2(2) . . . . ?
N2A Ta1 C23A C24A 173.93(12) . . . . ?
N1A Ta1 C23A C24A 113.55(13) . . . . ?
C20A Ta1 C23A C24A -39.06(13) . . . . ?
C21A Ta1 C23A C24A -81.00(14) . . . . ?
C22A Ta1 C23A C24A -117.13(19) . . . . ?
N1 Ta1 C23A C28A -125.4(2) . . . . ?
N2A Ta1 C23A C28A 53.7(2) . . . . ?
N1A Ta1 C23A C28A -6.7(2) . . . . ?
C20A Ta1 C23A C28A -159.3(2) . . . . ?
C24A Ta1 C23A C28A -120.2(3) . . . . ?
C21A Ta1 C23A C28A 158.7(2) . . . . ?
C22A Ta1 C23A C28A 122.6(3) . . . . ?
C21A C20A C24A C23A -2.6(2) . . . . ?
C25A C20A C24A C23A 173.7(2) . . . . ?
Ta1 C20A C24A C23A -69.69(15) . . . . ?
C21A C20A C24A C29A -173.7(2) . . . . ?
C25A C20A C24A C29A 2.6(4) . . . . ?
Ta1 C20A C24A C29A 119.1(2) . . . . ?
C21A C20A C24A Ta1 67.12(15) . . . . ?
C25A C20A C24A Ta1 -116.6(2) . . . . ?
C22A C23A C24A C20A 1.4(2) . . . . ?
C28A C23A C24A C20A -177.7(2) . . . . ?
Ta1 C23A C24A C20A 66.01(14) . . . . ?
C22A C23A C24A C29A 172.5(2) . . . . ?
C28A C23A C24A C29A -6.7(4) . . . . ?
Ta1 C23A C24A C29A -122.9(2) . . . . ?
C22A C23A C24A Ta1 -64.59(15) . . . . ?
C28A C23A C24A Ta1 116.3(2) . . . . ?
N1 Ta1 C24A C20A 63.35(15) . . . . ?
N2A Ta1 C24A C20A -123.12(14) . . . . ?
N1A Ta1 C24A C20A 174.32(13) . . . . ?
C21A Ta1 C24A C20A -37.78(13) . . . . ?
C23A Ta1 C24A C20A -113.62(19) . . . . ?
C22A Ta1 C24A C20A -78.19(14) . . . . ?
N1 Ta1 C24A C23A 176.97(12) . . . . ?
N2A Ta1 C24A C23A -9.50(19) . . . . ?
N1A Ta1 C24A C23A -72.06(14) . . . . ?
C20A Ta1 C24A C23A 113.62(19) . . . . ?
C21A Ta1 C24A C23A 75.84(14) . . . . ?
C22A Ta1 C24A C23A 35.43(12) . . . . ?
N1 Ta1 C24A C29A -57.5(2) . . . . ?
N2A Ta1 C24A C29A 116.1(2) . . . . ?
N1A Ta1 C24A C29A 53.5(2) . . . . ?
C20A Ta1 C24A C29A -120.8(3) . . . . ?
C21A Ta1 C24A C29A -158.6(3) . . . . ?
C23A Ta1 C24A C29A 125.6(3) . . . . ?
C22A Ta1 C24A C29A 161.0(3) . . . . ?
N1B C1B C2B C3B -84.6(3) . . . . ?
N2B C1B C2B C3B 93.9(3) . . . . ?
N1B C1B C2B C7B 98.1(3) . . . . ?
N2B C1B C2B C7B -83.4(3) . . . . ?
C7B C2B C3B C4B -0.5(4) . . . . ?
C1B C2B C3B C4B -177.8(2) . . . . ?
C2B C3B C4B C5B -0.7(4) . . . . ?
C3B C4B C5B C6B 1.2(4) . . . . ?
C4B C5B C6B C7B -0.4(4) . . . . ?
C5B C6B C7B C2B -0.9(4) . . . . ?
C3B C2B C7B C6B 1.3(4) . . . . ?
C1B C2B C7B C6B 178.7(2) . . . . ?
N2B C1B N1B C8B -174.8(2) . . . . ?
C2B C1B N1B C8B 3.8(4) . . . . ?
N2B C1B N1B Ta2 -14.00(19) . . . . ?
C2B C1B N1B Ta2 164.6(2) . . . . ?
N2 Ta2 N1B C1B -86.18(14) . . . . ?
N2B Ta2 N1B C1B 8.94(13) . . . . ?
C20B Ta2 N1B C1B 145.80(16) . . . . ?
C21B Ta2 N1B C1B 85.66(18) . . . . ?
C24B Ta2 N1B C1B 153.54(14) . . . . ?
C22B Ta2 N1B C1B 94.26(15) . . . . ?
C23B Ta2 N1B C1B 125.41(14) . . . . ?
N2 Ta2 N1B C8B 67.9(3) . . . . ?
N2B Ta2 N1B C8B 163.0(3) . . . . ?
C20B Ta2 N1B C8B -60.1(3) . . . . ?
C21B Ta2 N1B C8B -120.3(3) . . . . ?
C24B Ta2 N1B C8B -52.4(3) . . . . ?
C22B Ta2 N1B C8B -111.7(3) . . . . ?
C23B Ta2 N1B C8B -80.5(3) . . . . ?
C1B N1B C8B C10B -95.8(4) . . . . ?
Ta2 N1B C8B C10B 115.5(4) . . . . ?
C1B N1B C8B C9B 140.1(4) . . . . ?
Ta2 N1B C8B C9B -8.7(5) . . . . ?
N1B C1B N2B C11B 169.8(2) . . . . ?
C2B C1B N2B C11B -8.9(3) . . . . ?
N1B C1B N2B Ta2 14.01(19) . . . . ?
C2B C1B N2B Ta2 -164.7(2) . . . . ?
N2 Ta2 N2B C1B 94.80(14) . . . . ?
N1B Ta2 N2B C1B -8.93(13) . . . . ?
C20B Ta2 N2B C1B -156.14(13) . . . . ?
C21B Ta2 N2B C1B -148.32(13) . . . . ?
C24B Ta2 N2B C1B -98.00(18) . . . . ?
C22B Ta2 N2B C1B -114.98(14) . . . . ?
C23B Ta2 N2B C1B -89.34(14) . . . . ?
N2 Ta2 N2B C11B -53.1(2) . . . . ?
N1B Ta2 N2B C11B -156.8(3) . . . . ?
C20B Ta2 N2B C11B 56.0(3) . . . . ?
C21B Ta2 N2B C11B 63.8(2) . . . . ?
C24B Ta2 N2B C11B 114.1(2) . . . . ?
C22B Ta2 N2B C11B 97.1(2) . . . . ?
C23B Ta2 N2B C11B 122.8(2) . . . . ?
C1B N2B C11B C12B -126.0(2) . . . . ?
Ta2 N2B C11B C12B 15.4(3) . . . . ?
C1B N2B C11B C13B 111.6(3) . . . . ?
Ta2 N2B C11B C13B -107.1(3) . . . . ?
N2 Ta2 C20B C21B 126.17(14) . . . . ?
N2B Ta2 C20B C21B 13.3(2) . . . . ?
N1B Ta2 C20B C21B -102.32(19) . . . . ?
C24B Ta2 C20B C21B -114.8(2) . . . . ?
C22B Ta2 C20B C21B -38.32(14) . . . . ?
C23B Ta2 C20B C21B -77.64(15) . . . . ?
N2 Ta2 C20B C24B -119.07(16) . . . . ?
N2B Ta2 C20B C24B 128.03(16) . . . . ?
N1B Ta2 C20B C24B 12.4(2) . . . . ?
C21B Ta2 C20B C24B 114.8(2) . . . . ?
C22B Ta2 C20B C24B 76.45(16) . . . . ?
C23B Ta2 C20B C24B 37.13(15) . . . . ?
N2 Ta2 C20B C25B 4.0(2) . . . . ?
N2B Ta2 C20B C25B -108.9(2) . . . . ?
N1B Ta2 C20B C25B 135.5(2) . . . . ?
C21B Ta2 C20B C25B -122.2(3) . . . . ?
C24B Ta2 C20B C25B 123.0(3) . . . . ?
C22B Ta2 C20B C25B -160.5(3) . . . . ?
C23B Ta2 C20B C25B 160.2(3) . . . . ?
C24B C20B C21B C22B 2.6(2) . . . . ?
C25B C20B C21B C22B -175.3(2) . . . . ?
Ta2 C20B C21B C22B 69.96(16) . . . . ?
C24B C20B C21B C26B 173.6(2) . . . . ?
C25B C20B C21B C26B -4.4(4) . . . . ?
Ta2 C20B C21B C26B -119.1(2) . . . . ?
C24B C20B C21B Ta2 -67.37(15) . . . . ?
C25B C20B C21B Ta2 114.7(2) . . . . ?
N2 Ta2 C21B C20B -60.32(16) . . . . ?
N2B Ta2 C21B C20B -171.01(14) . . . . ?
N1B Ta2 C21B C20B 128.02(15) . . . . ?
C24B Ta2 C21B C20B 37.75(14) . . . . ?
C22B Ta2 C21B C20B 113.3(2) . . . . ?
C23B Ta2 C21B C20B 77.93(16) . . . . ?
N2 Ta2 C21B C22B -173.62(15) . . . . ?
N2B Ta2 C21B C22B 75.69(16) . . . . ?
N1B Ta2 C21B C22B 14.7(2) . . . . ?
C20B Ta2 C21B C22B -113.3(2) . . . . ?
C24B Ta2 C21B C22B -75.54(16) . . . . ?
C23B Ta2 C21B C22B -35.36(15) . . . . ?
N2 Ta2 C21B C26B 60.8(2) . . . . ?
N2B Ta2 C21B C26B -49.9(2) . . . . ?
N1B Ta2 C21B C26B -110.8(2) . . . . ?
C20B Ta2 C21B C26B 121.1(3) . . . . ?
C24B Ta2 C21B C26B 158.9(3) . . . . ?
C22B Ta2 C21B C26B -125.6(3) . . . . ?
C23B Ta2 C21B C26B -160.9(3) . . . . ?
C20B C21B C22B C23B -1.8(3) . . . . ?
C26B C21B C22B C23B -172.6(2) . . . . ?
Ta2 C21B C22B C23B 64.62(17) . . . . ?
C20B C21B C22B C27B 176.7(2) . . . . ?
C26B C21B C22B C27B 5.8(4) . . . . ?
Ta2 C21B C22B C27B -116.9(2) . . . . ?
C20B C21B C22B Ta2 -66.41(15) . . . . ?
C26B C21B C22B Ta2 122.7(3) . . . . ?
N2 Ta2 C22B C23B -106.29(18) . . . . ?
N2B Ta2 C22B C23B 133.44(15) . . . . ?
N1B Ta2 C22B C23B 72.96(16) . . . . ?
C20B Ta2 C22B C23B -77.79(16) . . . . ?
C21B Ta2 C22B C23B -116.9(2) . . . . ?
C24B Ta2 C22B C23B -35.82(14) . . . . ?
N2 Ta2 C22B C21B 10.6(2) . . . . ?
N2B Ta2 C22B C21B -109.66(16) . . . . ?
N1B Ta2 C22B C21B -170.13(15) . . . . ?
C20B Ta2 C22B C21B 39.11(15) . . . . ?
C24B Ta2 C22B C21B 81.08(17) . . . . ?
C23B Ta2 C22B C21B 116.9(2) . . . . ?
N2 Ta2 C22B C27B 130.4(2) . . . . ?
N2B Ta2 C22B C27B 10.1(2) . . . . ?
N1B Ta2 C22B C27B -50.4(2) . . . . ?
C20B Ta2 C22B C27B 158.9(3) . . . . ?
C21B Ta2 C22B C27B 119.8(3) . . . . ?
C24B Ta2 C22B C27B -159.1(3) . . . . ?
C23B Ta2 C22B C27B -123.3(3) . . . . ?
C21B C22B C23B C24B 0.3(3) . . . . ?
C27B C22B C23B C24B -178.2(2) . . . . ?
Ta2 C22B C23B C24B 60.74(16) . . . . ?
C21B C22B C23B C28B 175.2(2) . . . . ?
C27B C22B C23B C28B -3.2(4) . . . . ?
Ta2 C22B C23B C28B -124.3(3) . . . . ?
C21B C22B C23B Ta2 -60.44(16) . . . . ?
C27B C22B C23B Ta2 121.1(3) . . . . ?
N2 Ta2 C23B C22B 120.33(17) . . . . ?
N2B Ta2 C23B C22B -53.17(16) . . . . ?
N1B Ta2 C23B C22B -112.67(15) . . . . ?
C20B Ta2 C23B C22B 79.98(16) . . . . ?
C21B Ta2 C23B C22B 37.39(15) . . . . ?
C24B Ta2 C23B C22B 118.5(2) . . . . ?
N2 Ta2 C23B C24B 1.8(2) . . . . ?
N2B Ta2 C23B C24B -171.71(14) . . . . ?
N1B Ta2 C23B C24B 128.79(15) . . . . ?
C20B Ta2 C23B C24B -38.56(15) . . . . ?
C21B Ta2 C23B C24B -81.15(16) . . . . ?
C22B Ta2 C23B C24B -118.5(2) . . . . ?
N2 Ta2 C23B C28B -117.8(3) . . . . ?
N2B Ta2 C23B C28B 68.7(3) . . . . ?
N1B Ta2 C23B C28B 9.2(3) . . . . ?
C20B Ta2 C23B C28B -158.2(3) . . . . ?
C21B Ta2 C23B C28B 159.2(3) . . . . ?
C24B Ta2 C23B C28B -119.6(3) . . . . ?
C22B Ta2 C23B C28B 121.8(3) . . . . ?
C22B C23B C24B C20B 1.3(3) . . . . ?
C28B C23B C24B C20B -173.6(2) . . . . ?
Ta2 C23B C24B C20B 63.84(15) . . . . ?
C22B C23B C24B C29B 172.9(2) . . . . ?
C28B C23B C24B C29B -2.1(4) . . . . ?
Ta2 C23B C24B C29B -124.6(3) . . . . ?
C22B C23B C24B Ta2 -62.53(17) . . . . ?
C28B C23B C24B Ta2 122.5(2) . . . . ?
C21B C20B C24B C23B -2.4(3) . . . . ?
C25B C20B C24B C23B 175.5(2) . . . . ?
Ta2 C20B C24B C23B -68.19(16) . . . . ?
C21B C20B C24B C29B -174.2(2) . . . . ?
C25B C20B C24B C29B 3.7(4) . . . . ?
Ta2 C20B C24B C29B 120.0(2) . . . . ?
C21B C20B C24B Ta2 65.78(15) . . . . ?
C25B C20B C24B Ta2 -116.3(2) . . . . ?
N2 Ta2 C24B C23B -178.83(14) . . . . ?
N2B Ta2 C24B C23B 14.3(2) . . . . ?
N1B Ta2 C24B C23B -58.40(16) . . . . ?
C20B Ta2 C24B C23B 114.5(2) . . . . ?
C21B Ta2 C24B C23B 76.29(16) . . . . ?
C22B Ta2 C24B C23B 34.88(14) . . . . ?
N2 Ta2 C24B C20B 66.67(16) . . . . ?
N2B Ta2 C24B C20B -100.21(19) . . . . ?
N1B Ta2 C24B C20B -172.90(14) . . . . ?
C21B Ta2 C24B C20B -38.21(15) . . . . ?
C22B Ta2 C24B C20B -79.62(16) . . . . ?
C23B Ta2 C24B C20B -114.5(2) . . . . ?
N2 Ta2 C24B C29B -52.7(3) . . . . ?
N2B Ta2 C24B C29B 140.5(2) . . . . ?
N1B Ta2 C24B C29B 67.8(3) . . . . ?
C20B Ta2 C24B C29B -119.3(3) . . . . ?
C21B Ta2 C24B C29B -157.5(3) . . . . ?
C22B Ta2 C24B C29B 161.1(3) . . . . ?
C23B Ta2 C24B C29B 126.2(3) . . . . ?

_diffrn_measured_fraction_theta_max    0.999
_diffrn_reflns_theta_full              30.00
_diffrn_measured_fraction_theta_full   0.999
_refine_diff_density_max    1.345
_refine_diff_density_min   -0.623
_refine_diff_density_rms    0.081
 
_diffrn_orient_matrix_type            standard
_diffrn_orient_matrix_UB_11          -0.0387686
_diffrn_orient_matrix_UB_12          -0.0549994
_diffrn_orient_matrix_UB_13           0.0001171
_diffrn_orient_matrix_UB_21          -0.0272775
_diffrn_orient_matrix_UB_22           0.0032901
_diffrn_orient_matrix_UB_23          -0.0404453
_diffrn_orient_matrix_UB_31           0.0734530
_diffrn_orient_matrix_UB_32          -0.0278086
_diffrn_orient_matrix_UB_33          -0.0050170
_symmetry_space_group_name_Hall       '-P 2ybc'
_exptl_crystal_id               'Sita/Yonke BY-6-088A 150K'

_diffrn_measurement_details           610,610,610,790


_diffrn_source_voltage                50.00
_diffrn_source_current                30.00


_diffrn_measurement_specimen_support  'MiTeGen loop'
_diffrn_detector                      'CCD area detector'
_diffrn_detector_type                 'Bruker Smart Apex 2'

#_______________________________________________________________________________
#
_publ_section_references
;
Bruker (2005). Apex2. Bruker AXS Inc., Madison, Wisconsin, USA.

Sheldrick, G. M. (1990). Acta Cryst. A46, 467-473.

Sheldrick, G. M. (1996). SADABS. University of G\"ottingen, Germany.

Sheldrick, G. M. (1997). SHELXL-97. University of G\"ottingen, Germany.

Spek, A. L. (1990). Acta Cryst., A46, C-34.
;
data_cmpd1c

_audit_creation_method            'SHELXL-97 & ZCIF'
_chemical_name_systematic
;
cmpd1c
;
_chemical_name_common             'cmpd1c'
_chemical_formula_moiety          'C38 H70 N8 Ta2'
_chemical_formula_sum             'C38 H70 N8 Ta2'
_chemical_formula_weight          1000.92

loop_
 _atom_type_symbol
 _atom_type_description
 _atom_type_scat_dispersion_real
 _atom_type_scat_dispersion_imag
 _atom_type_scat_source
 'C'  'C'   0.0033   0.0016
 'International Tables Vol C Tables 4.2.6.8 and 6.1.1.4'
 'H'  'H'   0.0000   0.0000
 'International Tables Vol C Tables 4.2.6.8 and 6.1.1.4'
 'N'  'N'   0.0061   0.0033
 'International Tables Vol C Tables 4.2.6.8 and 6.1.1.4'
 'Ta'  'Ta'  -0.7052   6.5227
 'International Tables Vol C Tables 4.2.6.8 and 6.1.1.4'

_symmetry_cell_setting            Monoclinic
_symmetry_space_group_name_H-M    P21

loop_
 _symmetry_equiv_pos_as_xyz
 'x, y, z'
 '-x, y+1/2, -z'

_cell_length_a                    10.1527(12)
_cell_length_b                    16.0379(18)
_cell_length_c                    14.2362(16)
_cell_angle_alpha                 90.00
_cell_angle_beta                  110.774(2)
_cell_angle_gamma                 90.00
_cell_volume                      2167.3(4)
_cell_formula_units_Z             2
_cell_measurement_temperature     223(2)
_cell_measurement_reflns_used     6478
_cell_measurement_theta_min       2.1
_cell_measurement_theta_max       28.5

_exptl_crystal_description        prism
_exptl_crystal_colour             black
_exptl_crystal_size_max           0.20
_exptl_crystal_size_mid           0.13
_exptl_crystal_size_min           0.105
_exptl_crystal_density_meas       ?
_exptl_crystal_density_diffrn     1.534
_exptl_crystal_density_method     not-measured
_exptl_crystal_F_000              1000
_exptl_absorpt_coefficient_mu     5.079
_exptl_absorpt_correction_type    multi-scan
_exptl_absorpt_correction_T_min   0.432
_exptl_absorpt_correction_T_max   0.587
_exptl_absorpt_process_details    'SADABS (Sheldrick, 1996)'

_diffrn_ambient_temperature       223(2)
_diffrn_radiation_wavelength      0.71073
_diffrn_radiation_type            MoK\a
_diffrn_radiation_source          'fine-focus sealed tube'
_diffrn_radiation_monochromator   graphite
_diffrn_measurement_device_type   'three-circle diffractometer'
_diffrn_measurement_method        '\w and \f scans'
_diffrn_detector_area_resol_mean  8.33
_diffrn_standards_decay_%         0
_diffrn_reflns_number             34287
_diffrn_reflns_av_R_equivalents   0.0364
_diffrn_reflns_av_sigmaI/netI     0.0321
_diffrn_reflns_limit_h_min        -12
_diffrn_reflns_limit_h_max        13
_diffrn_reflns_limit_k_min        -20
_diffrn_reflns_limit_k_max        20
_diffrn_reflns_limit_l_min        -18
_diffrn_reflns_limit_l_max        18
_diffrn_reflns_theta_min          2.15
_diffrn_reflns_theta_max          27.50
_reflns_number_total              9992
_reflns_number_gt                 9375
_reflns_threshold_expression      >2sigma(I)

_computing_data_collection        'SMART (Bruker, 1999)'
_computing_cell_refinement        'SAINT (Bruker, 1999)'
_computing_data_reduction         SAINT
_computing_structure_solution     'SHELXS-97 (Sheldrick, 1990)'
_computing_structure_refinement   'SHELXL-97 (Sheldrick, 1997)'
_computing_molecular_graphics     'XSHEL (Bruker, 1999)'
_computing_publication_material   SHELXL-97

_refine_special_details
;
 Refinement of F^2^ against ALL reflections.  The weighted R-factor wR and
 goodness of fit S are based on F^2^, conventional R-factors R are based
 on F, with F set to zero for negative F^2^. The threshold expression of
 F^2^ > 2sigma(F^2^) is used only for calculating R-factors(gt) etc. and is
 not relevant to the choice of reflections for refinement.  R-factors based
 on F^2^ are statistically about twice as large as those based on F, and R-
 factors based on ALL data will be even larger.
;

_refine_ls_structure_factor_coef  Fsqd
_refine_ls_matrix_type            full
_refine_ls_weighting_scheme       calc
_refine_ls_weighting_details
'w=1/[\s^2^(Fo^2^)+(0.02P)^2^+5.965P], P=(max(Fo^2^,0)+2Fc^2^)/3'
_atom_sites_solution_primary      direct
_atom_sites_solution_secondary    difmap
_atom_sites_solution_hydrogens    geom
_refine_ls_hydrogen_treatment     constr
_refine_ls_extinction_method      none
_refine_ls_extinction_coef        ?
_refine_ls_abs_structure_details  '(Flack, 1983)'
_refine_ls_abs_structure_Flack    0.017(11)
_refine_ls_number_reflns          9992   # 5177 w/o Fiedel pairs
_refine_ls_number_parameters      457
_refine_ls_number_restraints      1
_refine_ls_R_factor_all           0.0319
_refine_ls_R_factor_gt            0.0277
_refine_ls_wR_factor_ref          0.0655
_refine_ls_wR_factor_gt           0.0632
_refine_ls_goodness_of_fit_ref    1.000
_refine_ls_restrained_S_all       1.000
_refine_ls_shift/su_max           0.001
_refine_ls_shift/su_mean          0.000

loop_
 _atom_site_label
 _atom_site_type_symbol
 _atom_site_fract_x
 _atom_site_fract_y
 _atom_site_fract_z
 _atom_site_U_iso_or_equiv
 _atom_site_adp_type
 _atom_site_occupancy
 _atom_site_symmetry_multiplicity
 _atom_site_calc_flag
 _atom_site_refinement_flags
 _atom_site_disorder_assembly
 _atom_site_disorder_group
Ta1 Ta 0.30228(2) 0.503405(14) 0.863637(14) 0.03280(5) Uani 1 1 d . . .
Ta2 Ta 0.28318(2) 0.598660(13) 0.532029(15) 0.03307(5) Uani 1 1 d . . .
N1 N 0.2829(5) 0.5434(3) 0.7404(3) 0.0355(10) Uani 1 1 d . . .
N2 N 0.2752(5) 0.5550(3) 0.6478(3) 0.0354(10) Uani 1 1 d . . .
N11 N 0.1015(10) 0.6602(4) 0.9871(7) 0.085(2) Uani 1 1 d . . .
N12 N 0.1105(6) 0.5408(3) 0.8901(4) 0.0481(13) Uani 1 1 d . . .
N13 N 0.3087(7) 0.6113(3) 0.9600(4) 0.0523(14) Uani 1 1 d . . .
C10 C 0.1740(8) 0.6059(5) 0.9483(5) 0.0536(16) Uani 1 1 d . . .
C11 C 0.1227(15) 0.7495(6) 0.9909(12) 0.132(5) Uani 1 1 d . . .
H11A H 0.1786 0.7644 0.9506 0.198 Uiso 1 1 calc R . .
H11B H 0.1715 0.7666 1.0599 0.198 Uiso 1 1 calc R . .
H11C H 0.0321 0.7773 0.9647 0.198 Uiso 1 1 calc R . .
C12 C -0.0075(14) 0.6295(7) 1.0234(10) 0.123(5) Uani 1 1 d . . .
H12A H 0.0083 0.6521 1.0897 0.185 Uiso 1 1 calc R . .
H12B H -0.0037 0.5691 1.0268 0.185 Uiso 1 1 calc R . .
H12C H -0.0993 0.6470 0.9776 0.185 Uiso 1 1 calc R . .
C13 C -0.0368(9) 0.6198(7) 0.7419(8) 0.093(3) Uani 1 1 d . . .
H13A H -0.0254 0.6739 0.7743 0.140 Uiso 1 1 calc R . .
H13B H -0.1264 0.6179 0.6866 0.140 Uiso 1 1 calc R . .
H13C H 0.0390 0.6108 0.7165 0.140 Uiso 1 1 calc R . .
C14 C -0.0330(8) 0.5518(6) 0.8178(7) 0.070(2) Uani 1 1 d . . .
H14 H -0.0962 0.5674 0.8542 0.085 Uiso 1 1 calc R . .
C15 C -0.0851(10) 0.4714(7) 0.7602(9) 0.103(4) Uani 1 1 d . . .
H15A H -0.1799 0.4795 0.7125 0.154 Uiso 1 1 calc R . .
H15B H -0.0855 0.4274 0.8068 0.154 Uiso 1 1 calc R . .
H15C H -0.0232 0.4560 0.7245 0.154 Uiso 1 1 calc R . .
C16 C 0.5489(11) 0.6625(6) 1.0125(8) 0.099(4) Uani 1 1 d . . .
H16A H 0.6194 0.6963 1.0618 0.148 Uiso 1 1 calc R . .
H16B H 0.5305 0.6852 0.9460 0.148 Uiso 1 1 calc R . .
H16C H 0.5830 0.6058 1.0152 0.148 Uiso 1 1 calc R . .
C17 C 0.4142(12) 0.6629(6) 1.0354(7) 0.086(3) Uani 1 1 d . . .
H17 H 0.3786 0.7209 1.0300 0.103 Uiso 1 1 calc R . .
C18 C 0.4407(13) 0.6314(8) 1.1411(7) 0.116(4) Uani 1 1 d . . .
H18A H 0.4703 0.5736 1.1462 0.173 Uiso 1 1 calc R . .
H18B H 0.3547 0.6359 1.1558 0.173 Uiso 1 1 calc R . .
H18C H 0.5139 0.6647 1.1889 0.173 Uiso 1 1 calc R . .
N21 N 0.1230(8) 0.4207(5) 0.3233(6) 0.079(2) Uani 1 1 d . . .
N22 N 0.1050(5) 0.5501(3) 0.4045(4) 0.0436(11) Uani 1 1 d . . .
N23 N 0.3149(6) 0.4909(3) 0.4475(4) 0.0448(12) Uani 1 1 d . . .
C20 C 0.1816(7) 0.4861(4) 0.3903(5) 0.0469(14) Uani 1 1 d . . .
C21 C 0.1452(11) 0.3355(6) 0.3541(10) 0.107(4) Uani 1 1 d . . .
H21A H 0.0582 0.3046 0.3239 0.160 Uiso 1 1 calc R . .
H21B H 0.1745 0.3323 0.4267 0.160 Uiso 1 1 calc R . .
H21C H 0.2178 0.3118 0.3328 0.160 Uiso 1 1 calc R . .
C22 C 0.0316(13) 0.4375(9) 0.2216(8) 0.127(5) Uani 1 1 d . . .
H22A H 0.0275 0.4971 0.2096 0.191 Uiso 1 1 calc R . .
H22B H -0.0622 0.4167 0.2115 0.191 Uiso 1 1 calc R . .
H22C H 0.0680 0.4099 0.1752 0.191 Uiso 1 1 calc R . .
C23 C -0.0776(10) 0.5426(8) 0.4769(9) 0.105(4) Uani 1 1 d . . .
H23A H -0.0585 0.5982 0.5054 0.157 Uiso 1 1 calc R . .
H23B H -0.0183 0.5026 0.5244 0.157 Uiso 1 1 calc R . .
H23C H -0.1758 0.5289 0.4628 0.157 Uiso 1 1 calc R . .
C24 C -0.0472(7) 0.5396(5) 0.3823(6) 0.0599(18) Uani 1 1 d . . .
H24 H -0.0736 0.4834 0.3529 0.072 Uiso 1 1 calc R . .
C25 C -0.1313(10) 0.6016(9) 0.3065(9) 0.124(4) Uani 1 1 d . . .
H25A H -0.1247 0.6558 0.3382 0.186 Uiso 1 1 calc R . .
H25B H -0.2290 0.5841 0.2799 0.186 Uiso 1 1 calc R . .
H25C H -0.0947 0.6052 0.2523 0.186 Uiso 1 1 calc R . .
C26 C 0.5583(8) 0.4469(5) 0.5296(6) 0.066(2) Uani 1 1 d . . .
H26A H 0.5883 0.5047 0.5391 0.099 Uiso 1 1 calc R . .
H26B H 0.6329 0.4129 0.5222 0.099 Uiso 1 1 calc R . .
H26C H 0.5373 0.4281 0.5875 0.099 Uiso 1 1 calc R . .
C27 C 0.4276(8) 0.4393(5) 0.4362(6) 0.0579(18) Uani 1 1 d . . .
H27 H 0.3963 0.3805 0.4295 0.069 Uiso 1 1 calc R . .
C28 C 0.4588(11) 0.4626(7) 0.3435(6) 0.091(3) Uani 1 1 d . . .
H28A H 0.3766 0.4515 0.2842 0.136 Uiso 1 1 calc R . .
H28B H 0.5377 0.4299 0.3408 0.136 Uiso 1 1 calc R . .
H28C H 0.4822 0.5214 0.3460 0.136 Uiso 1 1 calc R . .
C30 C 0.3545(9) 0.3806(4) 0.9729(5) 0.0490(17) Uani 1 1 d . . .
C31 C 0.2771(9) 0.3554(4) 0.8736(5) 0.0522(17) Uani 1 1 d . . .
C32 C 0.3553(9) 0.3680(4) 0.8144(5) 0.0542(17) Uani 1 1 d . . .
C33 C 0.4837(8) 0.4032(4) 0.8720(6) 0.0559(18) Uani 1 1 d . . .
C34 C 0.4856(8) 0.4114(5) 0.9746(6) 0.0601(18) Uani 1 1 d . . .
C35 C 0.3092(12) 0.3722(6) 1.0614(7) 0.081(3) Uani 1 1 d . . .
H35A H 0.3802 0.3963 1.1201 0.121 Uiso 1 1 calc R . .
H35B H 0.2974 0.3136 1.0736 0.121 Uiso 1 1 calc R . .
H35C H 0.2205 0.4011 1.0480 0.121 Uiso 1 1 calc R . .
C36 C 0.1354(10) 0.3084(6) 0.8432(8) 0.088(3) Uani 1 1 d . . .
H36A H 0.1530 0.2495 0.8584 0.132 Uiso 1 1 calc R . .
H36B H 0.0845 0.3153 0.7718 0.132 Uiso 1 1 calc R . .
H36C H 0.0796 0.3306 0.8804 0.132 Uiso 1 1 calc R . .
C37 C 0.3125(14) 0.3459(6) 0.7030(6) 0.089(3) Uani 1 1 d . . .
H37A H 0.3662 0.2980 0.6955 0.133 Uiso 1 1 calc R . .
H37B H 0.3313 0.3930 0.6668 0.133 Uiso 1 1 calc R . .
H37C H 0.2128 0.3328 0.6760 0.133 Uiso 1 1 calc R . .
C38 C 0.6039(11) 0.4256(7) 0.8377(10) 0.108(4) Uani 1 1 d . . .
H38A H 0.5686 0.4590 0.7770 0.161 Uiso 1 1 calc R . .
H38B H 0.6463 0.3750 0.8240 0.161 Uiso 1 1 calc R . .
H38C H 0.6740 0.4572 0.8899 0.161 Uiso 1 1 calc R . .
C39 C 0.6113(11) 0.4322(7) 1.0655(8) 0.111(4) Uani 1 1 d . . .
H39A H 0.6617 0.3815 1.0938 0.166 Uiso 1 1 calc R . .
H39B H 0.5806 0.4594 1.1151 0.166 Uiso 1 1 calc R . .
H39C H 0.6731 0.4694 1.0466 0.166 Uiso 1 1 calc R . .
C40 C 0.3178(9) 0.7242(4) 0.4477(5) 0.0494(16) Uani 1 1 d . . .
C41 C 0.2360(8) 0.7457(4) 0.5069(5) 0.0492(15) Uani 1 1 d . . .
C42 C 0.3235(7) 0.7349(4) 0.6086(5) 0.0447(14) Uani 1 1 d . . .
C43 C 0.4554(7) 0.7046(4) 0.6128(4) 0.0436(13) Uani 1 1 d . . .
C44 C 0.4546(8) 0.6982(4) 0.5123(5) 0.0477(15) Uani 1 1 d . . .
C45 C 0.2679(12) 0.7299(6) 0.3331(6) 0.078(3) Uani 1 1 d . . .
H45A H 0.1887 0.6927 0.3037 0.117 Uiso 1 1 calc R . .
H45B H 0.3442 0.7140 0.3107 0.117 Uiso 1 1 calc R . .
H45C H 0.2393 0.7867 0.3122 0.117 Uiso 1 1 calc R . .
C46 C 0.0934(11) 0.7859(6) 0.4696(8) 0.087(3) Uani 1 1 d . . .
H46A H 0.0388 0.7661 0.5089 0.130 Uiso 1 1 calc R . .
H46B H 0.0453 0.7716 0.3995 0.130 Uiso 1 1 calc R . .
H46C H 0.1039 0.8459 0.4763 0.130 Uiso 1 1 calc R . .
C47 C 0.2834(10) 0.7543(5) 0.6991(6) 0.064(2) Uani 1 1 d . . .
H47A H 0.3006 0.8129 0.7161 0.096 Uiso 1 1 calc R . .
H47B H 0.3396 0.7205 0.7556 0.096 Uiso 1 1 calc R . .
H47C H 0.1844 0.7420 0.6835 0.096 Uiso 1 1 calc R . .
C48 C 0.5768(8) 0.6841(6) 0.7071(6) 0.069(2) Uani 1 1 d . . .
H48A H 0.6457 0.6513 0.6902 0.103 Uiso 1 1 calc R . .
H48B H 0.5430 0.6523 0.7520 0.103 Uiso 1 1 calc R . .
H48C H 0.6202 0.7353 0.7399 0.103 Uiso 1 1 calc R . .
C49 C 0.5766(9) 0.6789(5) 0.4797(7) 0.068(2) Uani 1 1 d . . .
H49A H 0.6139 0.7304 0.4634 0.102 Uiso 1 1 calc R . .
H49B H 0.5453 0.6432 0.4210 0.102 Uiso 1 1 calc R . .
H49C H 0.6497 0.6508 0.5338 0.102 Uiso 1 1 calc R . .

loop_
 _atom_site_aniso_label
 _atom_site_aniso_U_11
 _atom_site_aniso_U_22
 _atom_site_aniso_U_33
 _atom_site_aniso_U_23
 _atom_site_aniso_U_13
 _atom_site_aniso_U_12
Ta1 0.03862(11) 0.03024(10) 0.03019(10) 0.00144(8) 0.01301(8) 0.00176(9)
Ta2 0.03857(11) 0.03094(10) 0.03052(10) 0.00144(8) 0.01327(8) 0.00024(9)
N1 0.042(3) 0.034(2) 0.030(2) -0.0015(18) 0.012(2) -0.0004(19)
N2 0.039(3) 0.035(2) 0.033(2) 0.0019(19) 0.014(2) -0.0011(19)
N11 0.112(6) 0.057(4) 0.107(6) -0.006(4) 0.066(5) 0.028(4)
N12 0.050(3) 0.046(3) 0.057(3) 0.008(2) 0.030(3) 0.003(2)
N13 0.074(4) 0.032(3) 0.048(3) -0.011(2) 0.019(3) 0.002(3)
C10 0.077(5) 0.047(4) 0.047(3) 0.007(3) 0.035(3) 0.014(4)
C11 0.149(12) 0.058(6) 0.206(15) -0.019(7) 0.083(11) 0.030(7)
C12 0.160(11) 0.116(9) 0.154(11) 0.016(8) 0.130(10) 0.038(8)
C13 0.054(5) 0.119(9) 0.100(7) 0.043(6) 0.018(5) 0.035(5)
C14 0.043(4) 0.080(5) 0.092(6) 0.010(5) 0.029(4) 0.010(4)
C15 0.054(5) 0.107(8) 0.129(9) -0.009(7) 0.010(6) -0.010(5)
C16 0.092(7) 0.086(7) 0.092(7) -0.005(5) 0.000(6) -0.046(6)
C17 0.113(8) 0.055(5) 0.073(6) -0.025(4) 0.014(6) -0.014(5)
C18 0.121(9) 0.156(12) 0.050(5) -0.036(6) 0.007(5) 0.003(8)
N21 0.078(5) 0.073(5) 0.077(5) -0.040(4) 0.018(4) -0.021(4)
N22 0.037(3) 0.050(3) 0.040(2) -0.003(2) 0.010(2) -0.001(2)
N23 0.047(3) 0.039(3) 0.049(3) -0.007(2) 0.018(2) 0.003(2)
C20 0.054(4) 0.043(4) 0.042(3) -0.006(2) 0.015(3) -0.003(3)
C21 0.080(7) 0.057(5) 0.188(13) -0.043(6) 0.053(8) -0.014(5)
C22 0.111(9) 0.178(13) 0.076(7) -0.069(8) 0.013(6) -0.035(9)
C23 0.053(5) 0.146(10) 0.124(9) -0.011(8) 0.041(6) -0.023(6)
C24 0.038(4) 0.061(4) 0.069(5) -0.002(3) 0.004(3) -0.001(3)
C25 0.064(6) 0.122(9) 0.146(10) 0.030(9) -0.012(6) 0.013(7)
C26 0.053(4) 0.075(5) 0.077(5) 0.015(4) 0.029(4) 0.020(4)
C27 0.051(4) 0.051(4) 0.079(5) -0.016(3) 0.031(4) 0.004(3)
C28 0.092(7) 0.131(9) 0.060(5) -0.026(5) 0.041(5) 0.012(6)
C30 0.074(5) 0.035(3) 0.043(3) 0.011(3) 0.028(3) 0.014(3)
C31 0.074(5) 0.027(3) 0.056(4) 0.002(3) 0.024(4) 0.001(3)
C32 0.076(5) 0.035(3) 0.053(4) -0.001(3) 0.024(4) 0.013(3)
C33 0.056(4) 0.046(3) 0.078(5) 0.020(3) 0.040(4) 0.018(3)
C34 0.059(4) 0.047(4) 0.058(4) 0.005(3) 0.002(3) 0.015(3)
C35 0.129(9) 0.063(5) 0.072(5) 0.029(5) 0.062(6) 0.024(5)
C36 0.083(6) 0.054(5) 0.118(8) 0.004(5) 0.024(6) -0.019(4)
C37 0.163(11) 0.055(5) 0.058(5) -0.004(4) 0.052(6) 0.013(6)
C38 0.092(7) 0.100(8) 0.167(11) 0.037(8) 0.090(8) 0.029(6)
C39 0.094(7) 0.078(6) 0.102(8) -0.003(6) -0.037(6) 0.021(6)
C40 0.073(5) 0.037(3) 0.041(3) 0.004(2) 0.023(3) -0.008(3)
C41 0.067(4) 0.027(3) 0.055(4) 0.005(3) 0.023(3) 0.003(3)
C42 0.060(4) 0.034(3) 0.047(3) -0.007(2) 0.027(3) -0.008(3)
C43 0.045(3) 0.045(3) 0.040(3) -0.006(2) 0.014(3) -0.012(3)
C44 0.061(4) 0.041(3) 0.051(3) -0.005(3) 0.031(3) -0.014(3)
C45 0.121(8) 0.068(5) 0.041(4) 0.016(4) 0.025(5) 0.004(5)
C46 0.088(7) 0.069(6) 0.093(7) 0.014(5) 0.020(5) 0.034(5)
C47 0.099(6) 0.045(4) 0.064(5) -0.014(3) 0.046(5) -0.005(4)
C48 0.052(4) 0.094(6) 0.057(4) -0.010(4) 0.015(4) -0.020(4)
C49 0.069(5) 0.069(5) 0.085(5) -0.006(4) 0.051(5) -0.014(4)

_geom_special_details
;
 All esds (except the esd in the dihedral angle between two l.s. planes)
 are estimated using the full covariance matrix.  The cell esds are taken
 into account individually in the estimation of esds in distances, angles
 and torsion angles; correlations between esds in cell parameters are only
 used when they are defined by crystal symmetry.  An approximate (isotropic)
 treatment of cell esds is used for estimating esds involving l.s. planes.
;

loop_
 _geom_bond_atom_site_label_1
 _geom_bond_atom_site_label_2
 _geom_bond_distance
 _geom_bond_site_symmetry_2
 _geom_bond_publ_flag
Ta1 N1 1.812(5) . ?
Ta1 N12 2.194(6) . ?
Ta1 N13 2.194(5) . ?
Ta1 C31 2.396(6) . ?
Ta1 C32 2.401(6) . ?
Ta1 C33 2.415(6) . ?
Ta1 C30 2.449(6) . ?
Ta1 C34 2.460(7) . ?
Ta1 C10 2.639(6) . ?
Ta2 N2 1.819(5) . ?
Ta2 N23 2.194(5) . ?
Ta2 N22 2.201(5) . ?
Ta2 C41 2.408(6) . ?
Ta2 C42 2.411(6) . ?
Ta2 C43 2.416(6) . ?
Ta2 C40 2.432(6) . ?
Ta2 C44 2.450(6) . ?
Ta2 C20 2.630(6) . ?
N1 N2 1.306(5) . ?
N11 C10 1.376(9) . ?
N11 C11 1.446(13) . ?
N11 C12 1.462(13) . ?
N12 C10 1.347(9) . ?
N12 C14 1.466(10) . ?
N13 C10 1.320(9) . ?
N13 C17 1.474(10) . ?
C11 H11A 0.9700 . ?
C11 H11B 0.9700 . ?
C11 H11C 0.9700 . ?
C12 H12A 0.9700 . ?
C12 H12B 0.9700 . ?
C12 H12C 0.9700 . ?
C13 C14 1.527(12) . ?
C13 H13A 0.9700 . ?
C13 H13B 0.9700 . ?
C13 H13C 0.9700 . ?
C14 C15 1.518(13) . ?
C14 H14 0.9900 . ?
C15 H15A 0.9700 . ?
C15 H15B 0.9700 . ?
C15 H15C 0.9700 . ?
C16 C17 1.513(15) . ?
C16 H16A 0.9700 . ?
C16 H16B 0.9700 . ?
C16 H16C 0.9700 . ?
C17 C18 1.519(14) . ?
C17 H17 0.9900 . ?
C18 H18A 0.9700 . ?
C18 H18B 0.9700 . ?
C18 H18C 0.9700 . ?
N21 C20 1.401(8) . ?
N21 C21 1.427(13) . ?
N21 C22 1.442(13) . ?
N22 C20 1.346(8) . ?
N22 C24 1.473(8) . ?
N23 C20 1.311(8) . ?
N23 C27 1.466(8) . ?
C21 H21A 0.9700 . ?
C21 H21B 0.9700 . ?
C21 H21C 0.9700 . ?
C22 H22A 0.9700 . ?
C22 H22B 0.9700 . ?
C22 H22C 0.9700 . ?
C23 C24 1.486(13) . ?
C23 H23A 0.9700 . ?
C23 H23B 0.9700 . ?
C23 H23C 0.9700 . ?
C24 C25 1.492(12) . ?
C24 H24 0.9900 . ?
C25 H25A 0.9700 . ?
C25 H25B 0.9700 . ?
C25 H25C 0.9700 . ?
C26 C27 1.515(11) . ?
C26 H26A 0.9700 . ?
C26 H26B 0.9700 . ?
C26 H26C 0.9700 . ?
C27 C28 1.508(11) . ?
C27 H27 0.9900 . ?
C28 H28A 0.9700 . ?
C28 H28B 0.9700 . ?
C28 H28C 0.9700 . ?
C30 C31 1.411(10) . ?
C30 C34 1.412(11) . ?
C30 C35 1.493(10) . ?
C31 C32 1.362(11) . ?
C31 C36 1.545(12) . ?
C32 C33 1.391(11) . ?
C32 C37 1.530(10) . ?
C33 C34 1.459(11) . ?
C33 C38 1.510(11) . ?
C34 C39 1.498(11) . ?
C35 H35A 0.9700 . ?
C35 H35B 0.9700 . ?
C35 H35C 0.9700 . ?
C36 H36A 0.9700 . ?
C36 H36B 0.9700 . ?
C36 H36C 0.9700 . ?
C37 H37A 0.9700 . ?
C37 H37B 0.9700 . ?
C37 H37C 0.9700 . ?
C38 H38A 0.9700 . ?
C38 H38B 0.9700 . ?
C38 H38C 0.9700 . ?
C39 H39A 0.9700 . ?
C39 H39B 0.9700 . ?
C39 H39C 0.9700 . ?
C40 C41 1.419(10) . ?
C40 C44 1.428(11) . ?
C40 C45 1.530(10) . ?
C41 C42 1.416(10) . ?
C41 C46 1.499(11) . ?
C42 C43 1.405(9) . ?
C42 C47 1.514(9) . ?
C43 C44 1.432(8) . ?
C43 C48 1.502(10) . ?
C44 C49 1.502(10) . ?
C45 H45A 0.9700 . ?
C45 H45B 0.9700 . ?
C45 H45C 0.9700 . ?
C46 H46A 0.9700 . ?
C46 H46B 0.9700 . ?
C46 H46C 0.9700 . ?
C47 H47A 0.9700 . ?
C47 H47B 0.9700 . ?
C47 H47C 0.9700 . ?
C48 H48A 0.9700 . ?
C48 H48B 0.9700 . ?
C48 H48C 0.9700 . ?
C49 H49A 0.9700 . ?
C49 H49B 0.9700 . ?
C49 H49C 0.9700 . ?

loop_
 _geom_angle_atom_site_label_1
 _geom_angle_atom_site_label_2
 _geom_angle_atom_site_label_3
 _geom_angle
 _geom_angle_site_symmetry_1
 _geom_angle_site_symmetry_3
 _geom_angle_publ_flag
N1 Ta1 N12 105.8(2) . . ?
N1 Ta1 N13 107.2(2) . . ?
N12 Ta1 N13 60.6(2) . . ?
N1 Ta1 C31 115.5(2) . . ?
N12 Ta1 C31 98.1(2) . . ?
N13 Ta1 C31 136.4(2) . . ?
N1 Ta1 C32 89.7(2) . . ?
N12 Ta1 C32 127.0(3) . . ?
N13 Ta1 C32 159.3(2) . . ?
C31 Ta1 C32 33.0(3) . . ?
N1 Ta1 C33 95.9(2) . . ?
N12 Ta1 C33 151.8(2) . . ?
N13 Ta1 C33 129.8(3) . . ?
C31 Ta1 C33 55.5(3) . . ?
C32 Ta1 C33 33.6(3) . . ?
N1 Ta1 C30 145.5(2) . . ?
N12 Ta1 C30 96.7(2) . . ?
N13 Ta1 C30 106.6(2) . . ?
C31 Ta1 C30 33.8(2) . . ?
C32 Ta1 C30 55.8(2) . . ?
C33 Ta1 C30 56.2(2) . . ?
N1 Ta1 C34 129.2(3) . . ?
N12 Ta1 C34 124.7(2) . . ?
N13 Ta1 C34 102.9(2) . . ?
C31 Ta1 C34 56.0(3) . . ?
C32 Ta1 C34 56.5(3) . . ?
C33 Ta1 C34 34.8(3) . . ?
C30 Ta1 C34 33.4(3) . . ?
N1 Ta1 C10 108.7(2) . . ?
N12 Ta1 C10 30.6(2) . . ?
N13 Ta1 C10 29.9(2) . . ?
C31 Ta1 C10 120.6(3) . . ?
C32 Ta1 C10 153.5(3) . . ?
C33 Ta1 C10 152.0(2) . . ?
C30 Ta1 C10 104.0(2) . . ?
C34 Ta1 C10 117.6(2) . . ?
N2 Ta2 N23 104.8(2) . . ?
N2 Ta2 N22 108.9(2) . . ?
N23 Ta2 N22 60.4(2) . . ?
N2 Ta2 C41 116.2(2) . . ?
N23 Ta2 C41 138.6(2) . . ?
N22 Ta2 C41 99.3(2) . . ?
N2 Ta2 C42 89.7(2) . . ?
N23 Ta2 C42 158.0(2) . . ?
N22 Ta2 C42 130.7(2) . . ?
C41 Ta2 C42 34.2(2) . . ?
N2 Ta2 C43 95.5(2) . . ?
N23 Ta2 C43 126.4(2) . . ?
N22 Ta2 C43 152.3(2) . . ?
C41 Ta2 C43 56.9(2) . . ?
C42 Ta2 C43 33.8(2) . . ?
N2 Ta2 C40 145.7(2) . . ?
N23 Ta2 C40 107.8(2) . . ?
N22 Ta2 C40 96.1(2) . . ?
C41 Ta2 C40 34.1(2) . . ?
C42 Ta2 C40 56.1(2) . . ?
C43 Ta2 C40 56.4(2) . . ?
N2 Ta2 C44 128.1(2) . . ?
N23 Ta2 C44 101.7(2) . . ?
N22 Ta2 C44 123.0(2) . . ?
C41 Ta2 C44 57.1(2) . . ?
C42 Ta2 C44 56.5(2) . . ?
C43 Ta2 C44 34.2(2) . . ?
C40 Ta2 C44 34.0(3) . . ?
N2 Ta2 C20 107.4(2) . . ?
N23 Ta2 C20 29.8(2) . . ?
N22 Ta2 C20 30.7(2) . . ?
C41 Ta2 C20 123.7(2) . . ?
C42 Ta2 C20 157.9(2) . . ?
C43 Ta2 C20 150.3(2) . . ?
C40 Ta2 C20 106.0(2) . . ?
C44 Ta2 C20 117.4(2) . . ?
N2 N1 Ta1 167.2(4) . . ?
N1 N2 Ta2 164.5(4) . . ?
C10 N11 C11 123.2(9) . . ?
C10 N11 C12 120.5(8) . . ?
C11 N11 C12 116.2(9) . . ?
C10 N12 C14 118.6(6) . . ?
C10 N12 Ta1 93.3(4) . . ?
C14 N12 Ta1 129.3(5) . . ?
C10 N13 C17 125.5(7) . . ?
C10 N13 Ta1 94.0(4) . . ?
C17 N13 Ta1 138.7(6) . . ?
N13 C10 N12 112.1(6) . . ?
N13 C10 N11 125.9(8) . . ?
N12 C10 N11 122.0(7) . . ?
N13 C10 Ta1 56.0(3) . . ?
N12 C10 Ta1 56.1(3) . . ?
N11 C10 Ta1 176.7(6) . . ?
N11 C11 H11A 109.5 . . ?
N11 C11 H11B 109.5 . . ?
H11A C11 H11B 109.5 . . ?
N11 C11 H11C 109.5 . . ?
H11A C11 H11C 109.5 . . ?
H11B C11 H11C 109.5 . . ?
N11 C12 H12A 109.5 . . ?
N11 C12 H12B 109.5 . . ?
H12A C12 H12B 109.5 . . ?
N11 C12 H12C 109.5 . . ?
H12A C12 H12C 109.5 . . ?
H12B C12 H12C 109.5 . . ?
C14 C13 H13A 109.5 . . ?
C14 C13 H13B 109.5 . . ?
H13A C13 H13B 109.5 . . ?
C14 C13 H13C 109.5 . . ?
H13A C13 H13C 109.5 . . ?
H13B C13 H13C 109.5 . . ?
N12 C14 C15 110.3(7) . . ?
N12 C14 C13 110.6(7) . . ?
C15 C14 C13 107.9(8) . . ?
N12 C14 H14 109.3 . . ?
C15 C14 H14 109.3 . . ?
C13 C14 H14 109.3 . . ?
C14 C15 H15A 109.5 . . ?
C14 C15 H15B 109.5 . . ?
H15A C15 H15B 109.5 . . ?
C14 C15 H15C 109.5 . . ?
H15A C15 H15C 109.5 . . ?
H15B C15 H15C 109.5 . . ?
C17 C16 H16A 109.5 . . ?
C17 C16 H16B 109.5 . . ?
H16A C16 H16B 109.5 . . ?
C17 C16 H16C 109.5 . . ?
H16A C16 H16C 109.5 . . ?
H16B C16 H16C 109.5 . . ?
N13 C17 C16 108.7(8) . . ?
N13 C17 C18 111.2(8) . . ?
C16 C17 C18 110.8(9) . . ?
N13 C17 H17 108.7 . . ?
C16 C17 H17 108.7 . . ?
C18 C17 H17 108.7 . . ?
C17 C18 H18A 109.5 . . ?
C17 C18 H18B 109.5 . . ?
H18A C18 H18B 109.5 . . ?
C17 C18 H18C 109.5 . . ?
H18A C18 H18C 109.5 . . ?
H18B C18 H18C 109.5 . . ?
C20 N21 C21 121.7(8) . . ?
C20 N21 C22 120.7(8) . . ?
C21 N21 C22 117.6(9) . . ?
C20 N22 C24 119.9(6) . . ?
C20 N22 Ta2 92.5(4) . . ?
C24 N22 Ta2 135.3(4) . . ?
C20 N23 C27 124.9(6) . . ?
C20 N23 Ta2 93.8(4) . . ?
C27 N23 Ta2 141.0(5) . . ?
N23 C20 N22 112.7(5) . . ?
N23 C20 N21 124.2(6) . . ?
N22 C20 N21 123.1(6) . . ?
N23 C20 Ta2 56.3(3) . . ?
N22 C20 Ta2 56.7(3) . . ?
N21 C20 Ta2 173.1(5) . . ?
N21 C21 H21A 109.5 . . ?
N21 C21 H21B 109.5 . . ?
H21A C21 H21B 109.5 . . ?
N21 C21 H21C 109.5 . . ?
H21A C21 H21C 109.5 . . ?
H21B C21 H21C 109.5 . . ?
N21 C22 H22A 109.5 . . ?
N21 C22 H22B 109.5 . . ?
H22A C22 H22B 109.5 . . ?
N21 C22 H22C 109.5 . . ?
H22A C22 H22C 109.5 . . ?
H22B C22 H22C 109.5 . . ?
C24 C23 H23A 109.5 . . ?
C24 C23 H23B 109.5 . . ?
H23A C23 H23B 109.5 . . ?
C24 C23 H23C 109.5 . . ?
H23A C23 H23C 109.5 . . ?
H23B C23 H23C 109.5 . . ?
N22 C24 C23 110.0(6) . . ?
N22 C24 C25 111.5(7) . . ?
C23 C24 C25 112.6(9) . . ?
N22 C24 H24 107.5 . . ?
C23 C24 H24 107.5 . . ?
C25 C24 H24 107.5 . . ?
C24 C25 H25A 109.5 . . ?
C24 C25 H25B 109.5 . . ?
H25A C25 H25B 109.5 . . ?
C24 C25 H25C 109.5 . . ?
H25A C25 H25C 109.5 . . ?
H25B C25 H25C 109.5 . . ?
C27 C26 H26A 109.5 . . ?
C27 C26 H26B 109.5 . . ?
H26A C26 H26B 109.5 . . ?
C27 C26 H26C 109.5 . . ?
H26A C26 H26C 109.5 . . ?
H26B C26 H26C 109.5 . . ?
N23 C27 C28 111.8(7) . . ?
N23 C27 C26 109.4(6) . . ?
C28 C27 C26 111.0(7) . . ?
N23 C27 H27 108.2 . . ?
C28 C27 H27 108.2 . . ?
C26 C27 H27 108.2 . . ?
C27 C28 H28A 109.5 . . ?
C27 C28 H28B 109.5 . . ?
H28A C28 H28B 109.5 . . ?
C27 C28 H28C 109.5 . . ?
H28A C28 H28C 109.5 . . ?
H28B C28 H28C 109.5 . . ?
C31 C30 C34 107.7(6) . . ?
C31 C30 C35 126.2(8) . . ?
C34 C30 C35 126.0(8) . . ?
C31 C30 Ta1 71.0(4) . . ?
C34 C30 Ta1 73.7(4) . . ?
C35 C30 Ta1 123.1(5) . . ?
C32 C31 C30 109.8(7) . . ?
C32 C31 C36 126.0(7) . . ?
C30 C31 C36 123.6(8) . . ?
C32 C31 Ta1 73.7(4) . . ?
C30 C31 Ta1 75.1(4) . . ?
C36 C31 Ta1 125.2(5) . . ?
C31 C32 C33 108.9(6) . . ?
C31 C32 C37 126.4(8) . . ?
C33 C32 C37 124.6(8) . . ?
C31 C32 Ta1 73.3(4) . . ?
C33 C32 Ta1 73.8(4) . . ?
C37 C32 Ta1 120.1(5) . . ?
C32 C33 C34 107.7(6) . . ?
C32 C33 C38 127.0(8) . . ?
C34 C33 C38 125.3(9) . . ?
C32 C33 Ta1 72.7(4) . . ?
C34 C33 Ta1 74.3(4) . . ?
C38 C33 Ta1 121.0(6) . . ?
C30 C34 C33 105.9(6) . . ?
C30 C34 C39 127.0(9) . . ?
C33 C34 C39 126.1(9) . . ?
C30 C34 Ta1 72.8(4) . . ?
C33 C34 Ta1 70.9(4) . . ?
C39 C34 Ta1 129.8(6) . . ?
C30 C35 H35A 109.5 . . ?
C30 C35 H35B 109.5 . . ?
H35A C35 H35B 109.5 . . ?
C30 C35 H35C 109.5 . . ?
H35A C35 H35C 109.5 . . ?
H35B C35 H35C 109.5 . . ?
C31 C36 H36A 109.5 . . ?
C31 C36 H36B 109.5 . . ?
H36A C36 H36B 109.5 . . ?
C31 C36 H36C 109.5 . . ?
H36A C36 H36C 109.5 . . ?
H36B C36 H36C 109.5 . . ?
C32 C37 H37A 109.5 . . ?
C32 C37 H37B 109.5 . . ?
H37A C37 H37B 109.5 . . ?
C32 C37 H37C 109.5 . . ?
H37A C37 H37C 109.5 . . ?
H37B C37 H37C 109.5 . . ?
C33 C38 H38A 109.5 . . ?
C33 C38 H38B 109.5 . . ?
H38A C38 H38B 109.5 . . ?
C33 C38 H38C 109.5 . . ?
H38A C38 H38C 109.5 . . ?
H38B C38 H38C 109.5 . . ?
C34 C39 H39A 109.5 . . ?
C34 C39 H39B 109.5 . . ?
H39A C39 H39B 109.5 . . ?
C34 C39 H39C 109.5 . . ?
H39A C39 H39C 109.5 . . ?
H39B C39 H39C 109.5 . . ?
C41 C40 C44 109.2(6) . . ?
C41 C40 C45 125.2(8) . . ?
C44 C40 C45 125.6(7) . . ?
C41 C40 Ta2 72.0(4) . . ?
C44 C40 Ta2 73.7(4) . . ?
C45 C40 Ta2 121.7(5) . . ?
C42 C41 C40 106.9(6) . . ?
C42 C41 C46 126.3(7) . . ?
C40 C41 C46 126.1(7) . . ?
C42 C41 Ta2 73.0(3) . . ?
C40 C41 Ta2 73.9(4) . . ?
C46 C41 Ta2 126.1(6) . . ?
C43 C42 C41 109.2(6) . . ?
C43 C42 C47 125.0(6) . . ?
C41 C42 C47 125.8(7) . . ?
C43 C42 Ta2 73.3(3) . . ?
C41 C42 Ta2 72.8(3) . . ?
C47 C42 Ta2 121.1(4) . . ?
C42 C43 C44 108.3(6) . . ?
C42 C43 C48 125.6(6) . . ?
C44 C43 C48 126.1(6) . . ?
C42 C43 Ta2 72.9(3) . . ?
C44 C43 Ta2 74.2(3) . . ?
C48 C43 Ta2 119.8(5) . . ?
C40 C44 C43 106.4(6) . . ?
C40 C44 C49 125.6(6) . . ?
C43 C44 C49 127.6(7) . . ?
C40 C44 Ta2 72.3(4) . . ?
C43 C44 Ta2 71.6(3) . . ?
C49 C44 Ta2 126.8(5) . . ?
C40 C45 H45A 109.5 . . ?
C40 C45 H45B 109.5 . . ?
H45A C45 H45B 109.5 . . ?
C40 C45 H45C 109.5 . . ?
H45A C45 H45C 109.5 . . ?
H45B C45 H45C 109.5 . . ?
C41 C46 H46A 109.5 . . ?
C41 C46 H46B 109.5 . . ?
H46A C46 H46B 109.5 . . ?
C41 C46 H46C 109.5 . . ?
H46A C46 H46C 109.5 . . ?
H46B C46 H46C 109.5 . . ?
C42 C47 H47A 109.5 . . ?
C42 C47 H47B 109.5 . . ?
H47A C47 H47B 109.5 . . ?
C42 C47 H47C 109.5 . . ?
H47A C47 H47C 109.5 . . ?
H47B C47 H47C 109.5 . . ?
C43 C48 H48A 109.5 . . ?
C43 C48 H48B 109.5 . . ?
H48A C48 H48B 109.5 . . ?
C43 C48 H48C 109.5 . . ?
H48A C48 H48C 109.5 . . ?
H48B C48 H48C 109.5 . . ?
C44 C49 H49A 109.5 . . ?
C44 C49 H49B 109.5 . . ?
H49A C49 H49B 109.5 . . ?
C44 C49 H49C 109.5 . . ?
H49A C49 H49C 109.5 . . ?
H49B C49 H49C 109.5 . . ?

loop_
 _geom_torsion_atom_site_label_1
 _geom_torsion_atom_site_label_2
 _geom_torsion_atom_site_label_3
 _geom_torsion_atom_site_label_4
 _geom_torsion
 _geom_torsion_site_symmetry_1
 _geom_torsion_site_symmetry_2
 _geom_torsion_site_symmetry_3
 _geom_torsion_site_symmetry_4
 _geom_torsion_publ_flag
N12 Ta1 N1 N2 -127.6(19) . . . . ?
N13 Ta1 N1 N2 169.0(19) . . . . ?
C31 Ta1 N1 N2 -20(2) . . . . ?
C32 Ta1 N1 N2 1.0(19) . . . . ?
C33 Ta1 N1 N2 34.1(19) . . . . ?
C30 Ta1 N1 N2 1(2) . . . . ?
C34 Ta1 N1 N2 45(2) . . . . ?
C10 Ta1 N1 N2 -159.6(18) . . . . ?
Ta1 N1 N2 Ta2 -146.8(13) . . . . ?
N23 Ta2 N2 N1 151.4(15) . . . . ?
N22 Ta2 N2 N1 -145.3(15) . . . . ?
C41 Ta2 N2 N1 -34.3(16) . . . . ?
C42 Ta2 N2 N1 -11.9(15) . . . . ?
C43 Ta2 N2 N1 21.4(15) . . . . ?
C40 Ta2 N2 N1 -10.8(18) . . . . ?
C44 Ta2 N2 N1 33.1(16) . . . . ?
C20 Ta2 N2 N1 -177.7(15) . . . . ?
N1 Ta1 N12 C10 -100.2(4) . . . . ?
N13 Ta1 N12 C10 0.9(4) . . . . ?
C31 Ta1 N12 C10 140.4(4) . . . . ?
C32 Ta1 N12 C10 157.9(4) . . . . ?
C33 Ta1 N12 C10 121.2(6) . . . . ?
C30 Ta1 N12 C10 106.2(4) . . . . ?
C34 Ta1 N12 C10 86.4(4) . . . . ?
N1 Ta1 N12 C14 31.7(7) . . . . ?
N13 Ta1 N12 C14 132.8(7) . . . . ?
C31 Ta1 N12 C14 -87.8(6) . . . . ?
C32 Ta1 N12 C14 -70.3(7) . . . . ?
C33 Ta1 N12 C14 -106.9(8) . . . . ?
C30 Ta1 N12 C14 -121.9(6) . . . . ?
C34 Ta1 N12 C14 -141.7(6) . . . . ?
C10 Ta1 N12 C14 131.9(8) . . . . ?
N1 Ta1 N13 C10 97.8(4) . . . . ?
N12 Ta1 N13 C10 -1.0(4) . . . . ?
C31 Ta1 N13 C10 -70.0(5) . . . . ?
C32 Ta1 N13 C10 -118.5(7) . . . . ?
C33 Ta1 N13 C10 -148.8(4) . . . . ?
C30 Ta1 N13 C10 -89.3(4) . . . . ?
C34 Ta1 N13 C10 -123.7(4) . . . . ?
N1 Ta1 N13 C17 -97.8(8) . . . . ?
N12 Ta1 N13 C17 163.5(9) . . . . ?
C31 Ta1 N13 C17 94.4(9) . . . . ?
C32 Ta1 N13 C17 46.0(12) . . . . ?
C33 Ta1 N13 C17 15.6(9) . . . . ?
C30 Ta1 N13 C17 75.1(9) . . . . ?
C34 Ta1 N13 C17 40.7(9) . . . . ?
C10 Ta1 N13 C17 164.4(11) . . . . ?
C17 N13 C10 N12 -166.0(7) . . . . ?
Ta1 N13 C10 N12 1.5(6) . . . . ?
C17 N13 C10 N11 15.8(12) . . . . ?
Ta1 N13 C10 N11 -176.8(7) . . . . ?
C17 N13 C10 Ta1 -167.4(8) . . . . ?
C14 N12 C10 N13 -140.5(7) . . . . ?
Ta1 N12 C10 N13 -1.5(6) . . . . ?
C14 N12 C10 N11 37.8(10) . . . . ?
Ta1 N12 C10 N11 176.8(6) . . . . ?
C14 N12 C10 Ta1 -139.0(7) . . . . ?
C11 N11 C10 N13 39.4(15) . . . . ?
C12 N11 C10 N13 -143.3(10) . . . . ?
C11 N11 C10 N12 -138.6(11) . . . . ?
C12 N11 C10 N12 38.7(13) . . . . ?
N1 Ta1 C10 N13 -92.2(4) . . . . ?
N12 Ta1 C10 N13 178.3(6) . . . . ?
C31 Ta1 C10 N13 131.1(4) . . . . ?
C32 Ta1 C10 N13 136.0(5) . . . . ?
C33 Ta1 C10 N13 57.9(7) . . . . ?
C30 Ta1 C10 N13 99.0(4) . . . . ?
C34 Ta1 C10 N13 66.2(5) . . . . ?
N1 Ta1 C10 N12 89.5(4) . . . . ?
N13 Ta1 C10 N12 -178.3(6) . . . . ?
C31 Ta1 C10 N12 -47.2(5) . . . . ?
C32 Ta1 C10 N12 -42.4(7) . . . . ?
C33 Ta1 C10 N12 -120.5(5) . . . . ?
C30 Ta1 C10 N12 -79.3(4) . . . . ?
C34 Ta1 C10 N12 -112.1(4) . . . . ?
C10 N12 C14 C15 -179.9(7) . . . . ?
Ta1 N12 C14 C15 58.0(10) . . . . ?
C10 N12 C14 C13 60.8(9) . . . . ?
Ta1 N12 C14 C13 -61.3(10) . . . . ?
C10 N13 C17 C16 -170.7(7) . . . . ?
Ta1 N13 C17 C16 28.5(12) . . . . ?
C10 N13 C17 C18 67.0(11) . . . . ?
Ta1 N13 C17 C18 -93.8(11) . . . . ?
N2 Ta2 N22 C20 -92.5(4) . . . . ?
N23 Ta2 N22 C20 4.2(4) . . . . ?
C41 Ta2 N22 C20 145.5(4) . . . . ?
C42 Ta2 N22 C20 160.9(4) . . . . ?
C43 Ta2 N22 C20 116.9(5) . . . . ?
C40 Ta2 N22 C20 111.3(4) . . . . ?
C44 Ta2 N22 C20 88.9(4) . . . . ?
N2 Ta2 N22 C24 46.3(7) . . . . ?
N23 Ta2 N22 C24 143.1(7) . . . . ?
C41 Ta2 N22 C24 -75.6(7) . . . . ?
C42 Ta2 N22 C24 -60.3(7) . . . . ?
C43 Ta2 N22 C24 -104.3(7) . . . . ?
C40 Ta2 N22 C24 -109.9(7) . . . . ?
C44 Ta2 N22 C24 -132.2(6) . . . . ?
C20 Ta2 N22 C24 138.9(8) . . . . ?
N2 Ta2 N23 C20 99.3(4) . . . . ?
N22 Ta2 N23 C20 -4.3(4) . . . . ?
C41 Ta2 N23 C20 -73.1(5) . . . . ?
C42 Ta2 N23 C20 -130.9(6) . . . . ?
C43 Ta2 N23 C20 -152.1(4) . . . . ?
C40 Ta2 N23 C20 -91.2(4) . . . . ?
C44 Ta2 N23 C20 -125.8(4) . . . . ?
N2 Ta2 N23 C27 -87.2(8) . . . . ?
N22 Ta2 N23 C27 169.2(8) . . . . ?
C41 Ta2 N23 C27 100.4(8) . . . . ?
C42 Ta2 N23 C27 42.6(11) . . . . ?
C43 Ta2 N23 C27 21.3(8) . . . . ?
C40 Ta2 N23 C27 82.3(8) . . . . ?
C44 Ta2 N23 C27 47.7(8) . . . . ?
C20 Ta2 N23 C27 173.5(10) . . . . ?
C27 N23 C20 N22 -168.4(6) . . . . ?
Ta2 N23 C20 N22 6.6(6) . . . . ?
C27 N23 C20 N21 13.3(11) . . . . ?
Ta2 N23 C20 N21 -171.7(7) . . . . ?
C27 N23 C20 Ta2 -175.0(8) . . . . ?
C24 N22 C20 N23 -154.3(6) . . . . ?
Ta2 N22 C20 N23 -6.6(6) . . . . ?
C24 N22 C20 N21 24.0(10) . . . . ?
Ta2 N22 C20 N21 171.7(6) . . . . ?
C24 N22 C20 Ta2 -147.7(6) . . . . ?
C21 N21 C20 N23 50.7(12) . . . . ?
C22 N21 C20 N23 -132.6(9) . . . . ?
C21 N21 C20 N22 -127.4(9) . . . . ?
C22 N21 C20 N22 49.3(12) . . . . ?
N2 Ta2 C20 N23 -89.5(4) . . . . ?
N22 Ta2 C20 N23 172.7(6) . . . . ?
C41 Ta2 C20 N23 130.5(4) . . . . ?
C42 Ta2 C20 N23 131.3(6) . . . . ?
C43 Ta2 C20 N23 49.4(6) . . . . ?
C40 Ta2 C20 N23 98.1(4) . . . . ?
C44 Ta2 C20 N23 63.5(4) . . . . ?
N2 Ta2 C20 N22 97.8(4) . . . . ?
N23 Ta2 C20 N22 -172.7(6) . . . . ?
C41 Ta2 C20 N22 -42.2(5) . . . . ?
C42 Ta2 C20 N22 -41.3(7) . . . . ?
C43 Ta2 C20 N22 -123.3(5) . . . . ?
C40 Ta2 C20 N22 -74.6(4) . . . . ?
C44 Ta2 C20 N22 -109.2(4) . . . . ?
C20 N22 C24 C23 112.2(8) . . . . ?
Ta2 N22 C24 C23 -18.5(11) . . . . ?
C20 N22 C24 C25 -122.2(9) . . . . ?
Ta2 N22 C24 C25 107.1(9) . . . . ?
C20 N23 C27 C28 70.8(9) . . . . ?
Ta2 N23 C27 C28 -101.2(9) . . . . ?
C20 N23 C27 C26 -165.8(6) . . . . ?
Ta2 N23 C27 C26 22.1(11) . . . . ?
N1 Ta1 C30 C31 -36.2(7) . . . . ?
N12 Ta1 C30 C31 94.6(5) . . . . ?
N13 Ta1 C30 C31 155.8(5) . . . . ?
C32 Ta1 C30 C31 -36.2(5) . . . . ?
C33 Ta1 C30 C31 -77.0(5) . . . . ?
C34 Ta1 C30 C31 -115.8(6) . . . . ?
C10 Ta1 C30 C31 124.8(5) . . . . ?
N1 Ta1 C30 C34 79.6(6) . . . . ?
N12 Ta1 C30 C34 -149.6(4) . . . . ?
N13 Ta1 C30 C34 -88.4(4) . . . . ?
C31 Ta1 C30 C34 115.8(6) . . . . ?
C32 Ta1 C30 C34 79.6(5) . . . . ?
C33 Ta1 C30 C34 38.8(4) . . . . ?
C10 Ta1 C30 C34 -119.4(4) . . . . ?
N1 Ta1 C30 C35 -157.7(7) . . . . ?
N12 Ta1 C30 C35 -26.9(8) . . . . ?
N13 Ta1 C30 C35 34.4(8) . . . . ?
C31 Ta1 C30 C35 -121.4(10) . . . . ?
C32 Ta1 C30 C35 -157.6(9) . . . . ?
C33 Ta1 C30 C35 161.6(9) . . . . ?
C34 Ta1 C30 C35 122.8(9) . . . . ?
C10 Ta1 C30 C35 3.4(8) . . . . ?
C34 C30 C31 C32 1.0(8) . . . . ?
C35 C30 C31 C32 -176.2(7) . . . . ?
Ta1 C30 C31 C32 66.2(5) . . . . ?
C34 C30 C31 C36 172.3(7) . . . . ?
C35 C30 C31 C36 -4.9(11) . . . . ?
Ta1 C30 C31 C36 -122.6(7) . . . . ?
C34 C30 C31 Ta1 -65.1(5) . . . . ?
C35 C30 C31 Ta1 117.7(7) . . . . ?
N1 Ta1 C31 C32 42.0(5) . . . . ?
N12 Ta1 C31 C32 153.8(5) . . . . ?
N13 Ta1 C31 C32 -151.0(4) . . . . ?
C33 Ta1 C31 C32 -37.0(5) . . . . ?
C30 Ta1 C31 C32 -116.2(7) . . . . ?
C34 Ta1 C31 C32 -79.5(5) . . . . ?
C10 Ta1 C31 C32 176.0(4) . . . . ?
N1 Ta1 C31 C30 158.2(4) . . . . ?
N12 Ta1 C31 C30 -89.9(5) . . . . ?
N13 Ta1 C31 C30 -34.7(6) . . . . ?
C32 Ta1 C31 C30 116.2(7) . . . . ?
C33 Ta1 C31 C30 79.2(5) . . . . ?
C34 Ta1 C31 C30 36.8(4) . . . . ?
C10 Ta1 C31 C30 -67.7(5) . . . . ?
N1 Ta1 C31 C36 -80.9(7) . . . . ?
N12 Ta1 C31 C36 30.9(7) . . . . ?
N13 Ta1 C31 C36 86.1(8) . . . . ?
C32 Ta1 C31 C36 -122.9(9) . . . . ?
C33 Ta1 C31 C36 -160.0(8) . . . . ?
C30 Ta1 C31 C36 120.8(9) . . . . ?
C34 Ta1 C31 C36 157.6(8) . . . . ?
C10 Ta1 C31 C36 53.1(8) . . . . ?
C30 C31 C32 C33 -1.4(8) . . . . ?
C36 C31 C32 C33 -172.3(7) . . . . ?
Ta1 C31 C32 C33 65.7(5) . . . . ?
C30 C31 C32 C37 177.5(7) . . . . ?
C36 C31 C32 C37 6.5(12) . . . . ?
Ta1 C31 C32 C37 -115.4(7) . . . . ?
C30 C31 C32 Ta1 -67.1(5) . . . . ?
C36 C31 C32 Ta1 122.0(8) . . . . ?
N1 Ta1 C32 C31 -142.8(5) . . . . ?
N12 Ta1 C32 C31 -33.2(6) . . . . ?
N13 Ta1 C32 C31 71.5(9) . . . . ?
C33 Ta1 C32 C31 116.1(6) . . . . ?
C30 Ta1 C32 C31 37.2(5) . . . . ?
C34 Ta1 C32 C31 77.7(5) . . . . ?
C10 Ta1 C32 C31 -7.7(8) . . . . ?
N1 Ta1 C32 C33 101.0(4) . . . . ?
N12 Ta1 C32 C33 -149.3(4) . . . . ?
N13 Ta1 C32 C33 -44.6(9) . . . . ?
C31 Ta1 C32 C33 -116.1(6) . . . . ?
C30 Ta1 C32 C33 -79.0(5) . . . . ?
C34 Ta1 C32 C33 -38.4(4) . . . . ?
C10 Ta1 C32 C33 -123.8(6) . . . . ?
N1 Ta1 C32 C37 -20.0(8) . . . . ?
N12 Ta1 C32 C37 89.7(8) . . . . ?
N13 Ta1 C32 C37 -165.6(7) . . . . ?
C31 Ta1 C32 C37 122.9(10) . . . . ?
C33 Ta1 C32 C37 -121.0(9) . . . . ?
C30 Ta1 C32 C37 160.1(9) . . . . ?
C34 Ta1 C32 C37 -159.4(9) . . . . ?
C10 Ta1 C32 C37 115.2(8) . . . . ?
C31 C32 C33 C34 1.1(8) . . . . ?
C37 C32 C33 C34 -177.7(7) . . . . ?
Ta1 C32 C33 C34 66.6(5) . . . . ?
C31 C32 C33 C38 178.5(8) . . . . ?
C37 C32 C33 C38 -0.4(12) . . . . ?
Ta1 C32 C33 C38 -116.1(8) . . . . ?
C31 C32 C33 Ta1 -65.4(5) . . . . ?
C37 C32 C33 Ta1 115.7(7) . . . . ?
N1 Ta1 C33 C32 -80.6(4) . . . . ?
N12 Ta1 C33 C32 59.6(7) . . . . ?
N13 Ta1 C33 C32 161.2(4) . . . . ?
C31 Ta1 C33 C32 36.4(4) . . . . ?
C30 Ta1 C33 C32 77.6(4) . . . . ?
C34 Ta1 C33 C32 114.8(6) . . . . ?
C10 Ta1 C33 C32 127.8(6) . . . . ?
N1 Ta1 C33 C34 164.6(5) . . . . ?
N12 Ta1 C33 C34 -55.2(8) . . . . ?
N13 Ta1 C33 C34 46.4(5) . . . . ?
C31 Ta1 C33 C34 -78.4(5) . . . . ?
C32 Ta1 C33 C34 -114.8(6) . . . . ?
C30 Ta1 C33 C34 -37.2(4) . . . . ?
C10 Ta1 C33 C34 13.0(8) . . . . ?
N1 Ta1 C33 C38 42.6(8) . . . . ?
N12 Ta1 C33 C38 -177.2(7) . . . . ?
N13 Ta1 C33 C38 -75.6(9) . . . . ?
C31 Ta1 C33 C38 159.6(9) . . . . ?
C32 Ta1 C33 C38 123.2(10) . . . . ?
C30 Ta1 C33 C38 -159.2(9) . . . . ?
C34 Ta1 C33 C38 -122.0(10) . . . . ?
C10 Ta1 C33 C38 -109.0(9) . . . . ?
C31 C30 C34 C33 -0.3(7) . . . . ?
C35 C30 C34 C33 176.9(6) . . . . ?
Ta1 C30 C34 C33 -63.7(4) . . . . ?
C31 C30 C34 C39 -169.4(7) . . . . ?
C35 C30 C34 C39 7.8(12) . . . . ?
Ta1 C30 C34 C39 127.3(8) . . . . ?
C31 C30 C34 Ta1 63.4(4) . . . . ?
C35 C30 C34 Ta1 -119.5(7) . . . . ?
C32 C33 C34 C30 -0.5(7) . . . . ?
C38 C33 C34 C30 -177.9(7) . . . . ?
Ta1 C33 C34 C30 65.0(5) . . . . ?
C32 C33 C34 C39 168.7(7) . . . . ?
C38 C33 C34 C39 -8.7(12) . . . . ?
Ta1 C33 C34 C39 -125.8(8) . . . . ?
C32 C33 C34 Ta1 -65.5(5) . . . . ?
C38 C33 C34 Ta1 117.2(8) . . . . ?
N1 Ta1 C34 C30 -134.1(4) . . . . ?
N12 Ta1 C34 C30 37.6(5) . . . . ?
N13 Ta1 C34 C30 100.6(4) . . . . ?
C31 Ta1 C34 C30 -37.2(4) . . . . ?
C32 Ta1 C34 C30 -77.2(5) . . . . ?
C33 Ta1 C34 C30 -114.2(6) . . . . ?
C10 Ta1 C34 C30 72.7(5) . . . . ?
N1 Ta1 C34 C33 -19.9(6) . . . . ?
N12 Ta1 C34 C33 151.8(4) . . . . ?
N13 Ta1 C34 C33 -145.2(4) . . . . ?
C31 Ta1 C34 C33 76.9(5) . . . . ?
C32 Ta1 C34 C33 37.0(4) . . . . ?
C30 Ta1 C34 C33 114.2(6) . . . . ?
C10 Ta1 C34 C33 -173.1(4) . . . . ?
N1 Ta1 C34 C39 101.6(10) . . . . ?
N12 Ta1 C34 C39 -86.6(10) . . . . ?
N13 Ta1 C34 C39 -23.6(10) . . . . ?
C31 Ta1 C34 C39 -161.5(11) . . . . ?
C32 Ta1 C34 C39 158.6(11) . . . . ?
C33 Ta1 C34 C39 121.6(11) . . . . ?
C30 Ta1 C34 C39 -124.2(11) . . . . ?
C10 Ta1 C34 C39 -51.6(10) . . . . ?
N2 Ta2 C40 C41 -39.7(7) . . . . ?
N23 Ta2 C40 C41 158.5(4) . . . . ?
N22 Ta2 C40 C41 97.6(4) . . . . ?
C42 Ta2 C40 C41 -38.2(4) . . . . ?
C43 Ta2 C40 C41 -79.2(4) . . . . ?
C44 Ta2 C40 C41 -117.1(6) . . . . ?
C20 Ta2 C40 C41 127.3(4) . . . . ?
N2 Ta2 C40 C44 77.4(6) . . . . ?
N23 Ta2 C40 C44 -84.4(4) . . . . ?
N22 Ta2 C40 C44 -145.3(4) . . . . ?
C41 Ta2 C40 C44 117.1(6) . . . . ?
C42 Ta2 C40 C44 78.8(4) . . . . ?
C43 Ta2 C40 C44 37.8(4) . . . . ?
C20 Ta2 C40 C44 -115.6(4) . . . . ?
N2 Ta2 C40 C45 -160.4(6) . . . . ?
N23 Ta2 C40 C45 37.7(7) . . . . ?
N22 Ta2 C40 C45 -23.1(7) . . . . ?
C41 Ta2 C40 C45 -120.8(9) . . . . ?
C42 Ta2 C40 C45 -159.0(8) . . . . ?
C43 Ta2 C40 C45 160.0(8) . . . . ?
C44 Ta2 C40 C45 122.2(8) . . . . ?
C20 Ta2 C40 C45 6.6(7) . . . . ?
C44 C40 C41 C42 1.3(7) . . . . ?
C45 C40 C41 C42 -177.4(7) . . . . ?
Ta2 C40 C41 C42 66.1(4) . . . . ?
C44 C40 C41 C46 171.9(7) . . . . ?
C45 C40 C41 C46 -6.7(12) . . . . ?
Ta2 C40 C41 C46 -123.3(8) . . . . ?
C44 C40 C41 Ta2 -64.8(5) . . . . ?
C45 C40 C41 Ta2 116.5(7) . . . . ?
N2 Ta2 C41 C42 42.6(5) . . . . ?
N23 Ta2 C41 C42 -145.7(4) . . . . ?
N22 Ta2 C41 C42 159.1(4) . . . . ?
C43 Ta2 C41 C42 -36.3(4) . . . . ?
C40 Ta2 C41 C42 -113.8(6) . . . . ?
C44 Ta2 C41 C42 -77.4(4) . . . . ?
C20 Ta2 C41 C42 179.4(4) . . . . ?
N2 Ta2 C41 C40 156.4(4) . . . . ?
N23 Ta2 C41 C40 -31.9(6) . . . . ?
N22 Ta2 C41 C40 -87.1(4) . . . . ?
C42 Ta2 C41 C40 113.8(6) . . . . ?
C43 Ta2 C41 C40 77.5(4) . . . . ?
C44 Ta2 C41 C40 36.4(4) . . . . ?
C20 Ta2 C41 C40 -66.7(5) . . . . ?
N2 Ta2 C41 C46 -80.3(7) . . . . ?
N23 Ta2 C41 C46 91.4(7) . . . . ?
N22 Ta2 C41 C46 36.2(7) . . . . ?
C42 Ta2 C41 C46 -122.9(8) . . . . ?
C43 Ta2 C41 C46 -159.3(8) . . . . ?
C40 Ta2 C41 C46 123.3(9) . . . . ?
C44 Ta2 C41 C46 159.7(8) . . . . ?
C20 Ta2 C41 C46 56.5(7) . . . . ?
C40 C41 C42 C43 -2.0(7) . . . . ?
C46 C41 C42 C43 -172.6(7) . . . . ?
Ta2 C41 C42 C43 64.7(4) . . . . ?
C40 C41 C42 C47 177.0(6) . . . . ?
C46 C41 C42 C47 6.4(11) . . . . ?
Ta2 C41 C42 C47 -116.4(6) . . . . ?
C40 C41 C42 Ta2 -66.7(4) . . . . ?
C46 C41 C42 Ta2 122.7(8) . . . . ?
N2 Ta2 C42 C43 100.5(4) . . . . ?
N23 Ta2 C42 C43 -31.6(8) . . . . ?
N22 Ta2 C42 C43 -144.6(4) . . . . ?
C41 Ta2 C42 C43 -116.9(5) . . . . ?
C40 Ta2 C42 C43 -78.7(4) . . . . ?
C44 Ta2 C42 C43 -37.6(4) . . . . ?
C20 Ta2 C42 C43 -118.2(6) . . . . ?
N2 Ta2 C42 C41 -142.6(4) . . . . ?
N23 Ta2 C42 C41 85.3(7) . . . . ?
N22 Ta2 C42 C41 -27.7(5) . . . . ?
C43 Ta2 C42 C41 116.9(5) . . . . ?
C40 Ta2 C42 C41 38.2(4) . . . . ?
C44 Ta2 C42 C41 79.4(4) . . . . ?
C20 Ta2 C42 C41 -1.3(8) . . . . ?
N2 Ta2 C42 C47 -20.8(6) . . . . ?
N23 Ta2 C42 C47 -152.9(6) . . . . ?
N22 Ta2 C42 C47 94.2(6) . . . . ?
C41 Ta2 C42 C47 121.8(8) . . . . ?
C43 Ta2 C42 C47 -121.3(8) . . . . ?
C40 Ta2 C42 C47 160.0(7) . . . . ?
C44 Ta2 C42 C47 -158.8(7) . . . . ?
C20 Ta2 C42 C47 120.6(7) . . . . ?
C41 C42 C43 C44 1.9(7) . . . . ?
C47 C42 C43 C44 -177.1(6) . . . . ?
Ta2 C42 C43 C44 66.3(4) . . . . ?
C41 C42 C43 C48 -179.2(6) . . . . ?
C47 C42 C43 C48 1.8(10) . . . . ?
Ta2 C42 C43 C48 -114.8(7) . . . . ?
C41 C42 C43 Ta2 -64.4(4) . . . . ?
C47 C42 C43 Ta2 116.7(6) . . . . ?
N2 Ta2 C43 C42 -81.1(4) . . . . ?
N23 Ta2 C43 C42 165.9(3) . . . . ?
N22 Ta2 C43 C42 71.1(6) . . . . ?
C41 Ta2 C43 C42 36.7(4) . . . . ?
C40 Ta2 C43 C42 77.8(4) . . . . ?
C44 Ta2 C43 C42 115.4(6) . . . . ?
C20 Ta2 C43 C42 138.0(4) . . . . ?
N2 Ta2 C43 C44 163.5(4) . . . . ?
N23 Ta2 C43 C44 50.5(5) . . . . ?
N22 Ta2 C43 C44 -44.3(7) . . . . ?
C41 Ta2 C43 C44 -78.7(4) . . . . ?
C42 Ta2 C43 C44 -115.4(6) . . . . ?
C40 Ta2 C43 C44 -37.6(4) . . . . ?
C20 Ta2 C43 C44 22.6(6) . . . . ?
N2 Ta2 C43 C48 40.6(6) . . . . ?
N23 Ta2 C43 C48 -72.4(6) . . . . ?
N22 Ta2 C43 C48 -167.2(5) . . . . ?
C41 Ta2 C43 C48 158.4(6) . . . . ?
C42 Ta2 C43 C48 121.7(7) . . . . ?
C40 Ta2 C43 C48 -160.5(6) . . . . ?
C44 Ta2 C43 C48 -122.9(7) . . . . ?
C20 Ta2 C43 C48 -100.4(6) . . . . ?
C41 C40 C44 C43 -0.2(7) . . . . ?
C45 C40 C44 C43 178.5(7) . . . . ?
Ta2 C40 C44 C43 -63.9(4) . . . . ?
C41 C40 C44 C49 -173.3(6) . . . . ?
C45 C40 C44 C49 5.4(11) . . . . ?
Ta2 C40 C44 C49 123.0(7) . . . . ?
C41 C40 C44 Ta2 63.7(5) . . . . ?
C45 C40 C44 Ta2 -117.6(7) . . . . ?
C42 C43 C44 C40 -1.0(7) . . . . ?
C48 C43 C44 C40 -179.9(7) . . . . ?
Ta2 C43 C44 C40 64.4(4) . . . . ?
C42 C43 C44 C49 171.9(7) . . . . ?
C48 C43 C44 C49 -7.0(11) . . . . ?
Ta2 C43 C44 C49 -122.7(7) . . . . ?
C42 C43 C44 Ta2 -65.4(4) . . . . ?
C48 C43 C44 Ta2 115.7(7) . . . . ?
N2 Ta2 C44 C40 -135.8(4) . . . . ?
N23 Ta2 C44 C40 104.7(4) . . . . ?
N22 Ta2 C44 C40 42.5(5) . . . . ?
C41 Ta2 C44 C40 -36.5(4) . . . . ?
C42 Ta2 C44 C40 -77.6(4) . . . . ?
C43 Ta2 C44 C40 -114.8(6) . . . . ?
C20 Ta2 C44 C40 77.6(4) . . . . ?
N2 Ta2 C44 C43 -21.0(5) . . . . ?
N23 Ta2 C44 C43 -140.6(4) . . . . ?
N22 Ta2 C44 C43 157.2(4) . . . . ?
C41 Ta2 C44 C43 78.3(4) . . . . ?
C42 Ta2 C44 C43 37.1(4) . . . . ?
C40 Ta2 C44 C43 114.8(6) . . . . ?
C20 Ta2 C44 C43 -167.6(4) . . . . ?
N2 Ta2 C44 C49 102.7(6) . . . . ?
N23 Ta2 C44 C49 -16.9(7) . . . . ?
N22 Ta2 C44 C49 -79.1(7) . . . . ?
C41 Ta2 C44 C49 -158.1(7) . . . . ?
C42 Ta2 C44 C49 160.8(7) . . . . ?
C43 Ta2 C44 C49 123.7(8) . . . . ?
C40 Ta2 C44 C49 -121.6(8) . . . . ?
C20 Ta2 C44 C49 -43.9(7) . . . . ?

_diffrn_measured_fraction_theta_max    0.999
_diffrn_reflns_theta_full              27.50
_diffrn_measured_fraction_theta_full   0.999
_refine_diff_density_max    2.058
_refine_diff_density_min   -0.718
_refine_diff_density_rms    0.102
 
_exptl_crystal_id                     'Sita/Hirotsu mh293'
_diffrn_measurement_details           366,366,366,606,606,606


_diffrn_source_voltage                50
_diffrn_source_current                30


_chemical_absolute_configuration      ad
_diffrn_orient_matrix_type            standard
_diffrn_orient_matrix_UB_11          -0.0587869
_diffrn_orient_matrix_UB_12          -0.0489423
_diffrn_orient_matrix_UB_13           0.0040231
_diffrn_orient_matrix_UB_21           0.0638253
_diffrn_orient_matrix_UB_22          -0.0102379
_diffrn_orient_matrix_UB_23           0.0708259
_diffrn_orient_matrix_UB_31          -0.0597291
_diffrn_orient_matrix_UB_32           0.0372493
_diffrn_orient_matrix_UB_33           0.0247286
_symmetry_space_group_name_Hall       'P 2yb'
_diffrn_measurement_specimen_support  'cactus needle'
_diffrn_detector                      'CCD area detector'
_diffrn_detector_type                 'Bruker Smart1000'
_reflns_Friedel_coverage              0.930

#_______________________________________________________________________________
#
_publ_section_references
;
Bruker (1999). SMART and SAINT. Bruker AXS Inc., Madison, Wisconsin,
USA.

Flack, H.D. (1983), Acta Cryst. A39, 876-881.

Sheldrick, G. M. (1990). Acta Cryst. A46, 467-473.

Sheldrick, G. M. (1996). SADABS. University of G\"ottingen, Germany.

Sheldrick, G. M. (1997). SHELXL-97. University of G\"ottingen, Germany.

Spek, A. L. (1990). Acta Cryst., A46, C-34.
;
data_cmpd2b

_audit_creation_method            'SHELXL-2012 & ZCIF'
_chemical_name_systematic
;
cmpd2b
;
_chemical_name_common             cmpd2b
_chemical_formula_moiety          'C46 H68 N6 Nb2'
_chemical_formula_sum             'C46 H68 N6 Nb2'
_chemical_formula_weight          890.88

loop_
 _atom_type_symbol
 _atom_type_description
 _atom_type_scat_dispersion_real
 _atom_type_scat_dispersion_imag
 _atom_type_scat_source
 'C'  'C'   0.0033   0.0016
 'International Tables Vol C Tables 4.2.6.8 and 6.1.1.4'
 'H'  'H'   0.0000   0.0000
 'International Tables Vol C Tables 4.2.6.8 and 6.1.1.4'
 'N'  'N'   0.0061   0.0033
 'International Tables Vol C Tables 4.2.6.8 and 6.1.1.4'
 'Nb'  'Nb'  -2.0727   0.6215
 'International Tables Vol C Tables 4.2.6.8 and 6.1.1.4'

_space_group_crystal_system       monoclinic
_space_group_IT_number            14
_space_group_name_H-M_alt         'P 21/n'
_space_group_name_Hall            '-P 2yn'

_shelx_space_group_comment
;
The symmetry employed for this shelxl refinement is uniquely defined
by the following loop, which should always be used as a source of
symmetry information in preference to the above space-group names.
They are only intended as comments.
;

loop_
 _space_group_symop_operation_xyz
 'x, y, z'
 '-x+1/2, y+1/2, -z+1/2'
 '-x, -y, -z'
 'x-1/2, -y-1/2, z-1/2'

_cell_length_a                    9.7368(5)
_cell_length_b                    20.4387(10)
_cell_length_c                    12.3870(6)
_cell_angle_alpha                 90
_cell_angle_beta                  109.4510(10)
_cell_angle_gamma                 90
_cell_volume                      2324.4(2)
_cell_formula_units_Z             2
_cell_measurement_temperature     150(2)
_cell_measurement_reflns_used     6448
_cell_measurement_theta_min       2.4
_cell_measurement_theta_max       31.0

_exptl_crystal_description        prism
_exptl_crystal_colour             black
_exptl_crystal_density_meas       ?
_exptl_crystal_density_method     'not measured'
_exptl_crystal_density_diffrn     1.273
_exptl_crystal_F_000              936
_exptl_transmission_factor_min    ?
_exptl_transmission_factor_max    ?
_exptl_crystal_size_max           0.21
_exptl_crystal_size_mid           0.09
_exptl_crystal_size_min           0.06
_exptl_absorpt_coefficient_mu     0.529
_shelx_estimated_absorpt_T_min    0.897
_shelx_estimated_absorpt_T_max    0.969
_exptl_absorpt_correction_type    multi-scan
_exptl_absorpt_correction_T_min   0.868
_exptl_absorpt_correction_T_max   0.969
_exptl_absorpt_process_details    'SADABS (Sheldrick, 2008)'

_diffrn_ambient_temperature       150(2)
_diffrn_radiation_wavelength      0.71073
_diffrn_radiation_type            MoK\a
_diffrn_source                    'sealed tube'
_diffrn_measurement_device_type   'three-circle diffractometer'
_diffrn_measurement_method        '\f and \w scans'
_diffrn_detector_area_resol_mean  8.333
_diffrn_reflns_number             18628
_diffrn_reflns_av_unetI/netI      0.0331
_diffrn_reflns_av_R_equivalents   0.0272
_diffrn_reflns_limit_h_min        -12
_diffrn_reflns_limit_h_max        13
_diffrn_reflns_limit_k_min        -28
_diffrn_reflns_limit_k_max        28
_diffrn_reflns_limit_l_min        -17
_diffrn_reflns_limit_l_max        17
_diffrn_reflns_theta_min          2.321
_diffrn_reflns_theta_max          30.000
_diffrn_reflns_theta_full         25.000
_diffrn_measured_fraction_theta_max   0.986
_diffrn_measured_fraction_theta_full  0.998
_diffrn_reflns_Laue_measured_fraction_max    0.986
_diffrn_reflns_Laue_measured_fraction_full   0.998
_diffrn_reflns_point_group_measured_fraction_max   0.986
_diffrn_reflns_point_group_measured_fraction_full  0.998
_reflns_number_total              6695
_reflns_number_gt                 5436
_reflns_threshold_expression      'I > 2\s(I)'
_reflns_Friedel_coverage          0.000
_reflns_Friedel_fraction_max      .
_reflns_Friedel_fraction_full     .

_reflns_special_details
;
 Reflections were merged by SHELXL according to the crystal
 class for the calculation of statistics and refinement.

 _reflns_Friedel_fraction is defined as the number of unique
 Friedel pairs measured divided by the number that would be
 possible theoretically, ignoring centric projections and
 systematic absences.
;

_computing_data_collection        'Apex2 (Bruker, 2010)'
_computing_cell_refinement        Apex2
_computing_data_reduction         Apex2
_computing_structure_solution     'ShelXS-97 (Sheldrick, 2008)'
_computing_structure_refinement   'ShelXL-2012 (Sheldrick, 2012)'
_computing_molecular_graphics     'XSHEL (Bruker, 2004)'
_computing_publication_material   'Apex2, SHELXL-2012'

_refine_ls_structure_factor_coef  Fsqd
_refine_ls_matrix_type            full
_refine_ls_weighting_scheme       calc
_refine_ls_weighting_details
;
 w=1/[\s^2^(Fo^2^)+(0.0100P)^2^+2.0470P]
 where P=(Fo^2^+2Fc^2^)/3
;
_atom_sites_solution_primary      direct
_atom_sites_solution_secondary    difmap
_atom_sites_solution_hydrogens    geom
_refine_ls_hydrogen_treatment     constr
_refine_ls_extinction_method      none
_refine_ls_extinction_coef        .
_refine_ls_number_reflns          6695
_refine_ls_number_parameters      254
_refine_ls_number_restraints      0
_refine_ls_R_factor_all           0.0434
_refine_ls_R_factor_gt            0.0311
_refine_ls_wR_factor_ref          0.0620
_refine_ls_wR_factor_gt           0.0580
_refine_ls_goodness_of_fit_ref    1.000
_refine_ls_restrained_S_all       1.000
_refine_ls_shift/su_max           0.000
_refine_ls_shift/su_mean          0.000

loop_
 _atom_site_label
 _atom_site_type_symbol
 _atom_site_fract_x
 _atom_site_fract_y
 _atom_site_fract_z
 _atom_site_U_iso_or_equiv
 _atom_site_adp_type
 _atom_site_occupancy
 _atom_site_site_symmetry_order
 _atom_site_calc_flag
 _atom_site_refinement_flags_posn
 _atom_site_refinement_flags_adp
 _atom_site_refinement_flags_occupancy
 _atom_site_disorder_assembly
 _atom_site_disorder_group
Nb1 Nb 0.85335(2) 0.06005(2) 0.82805(2) 0.02164(4) Uani 1 1 d . . . . .
N1 N 0.96992(16) 0.01939(7) 0.95701(12) 0.0242(3) Uani 1 1 d . . . . .
C1 C 1.00453(19) 0.16228(9) 0.80398(15) 0.0255(4) Uani 1 1 d . . . . .
N2 N 0.89909(16) 0.16623(7) 0.84986(13) 0.0270(3) Uani 1 1 d . . . . .
C2 C 0.8965(2) 0.21731(9) 0.93221(17) 0.0317(4) Uani 1 1 d . . . . .
H2 H 0.9519 0.2561 0.9197 0.038 Uiso 1 1 calc R U . . .
C3 C 0.7409(2) 0.23762(12) 0.9134(2) 0.0519(6) Uani 1 1 d . . . . .
H3A H 0.6971 0.2545 0.8354 0.078 Uiso 1 1 calc R U . . .
H3B H 0.7396 0.2719 0.9685 0.078 Uiso 1 1 calc R U . . .
H3C H 0.6852 0.1997 0.9242 0.078 Uiso 1 1 calc R U . . .
C4 C 0.9693(3) 0.19214(12) 1.05348(19) 0.0545(7) Uani 1 1 d . . . . .
H4A H 0.9258 0.1502 1.0627 0.082 Uiso 1 1 calc R U . . .
H4B H 0.9553 0.2238 1.1082 0.082 Uiso 1 1 calc R U . . .
H4C H 1.0738 0.1862 1.0676 0.082 Uiso 1 1 calc R U . . .
N3 N 1.00541(17) 0.10509(8) 0.75243(13) 0.0274(3) Uani 1 1 d . . . . .
C5 C 1.1217(2) 0.08617(10) 0.70777(17) 0.0326(4) Uani 1 1 d . . . . .
H5 H 1.2145 0.1072 0.7562 0.039 Uiso 1 1 calc R U . . .
C6 C 1.1411(3) 0.01238(11) 0.7174(2) 0.0487(6) Uani 1 1 d . . . . .
H6A H 1.1612 -0.0010 0.7972 0.073 Uiso 1 1 calc R U . . .
H6B H 1.2227 -0.0004 0.6924 0.073 Uiso 1 1 calc R U . . .
H6C H 1.0519 -0.0090 0.6688 0.073 Uiso 1 1 calc R U . . .
C7 C 1.0887(3) 0.10883(14) 0.5850(2) 0.0562(7) Uani 1 1 d . . . . .
H7A H 0.9979 0.0885 0.5364 0.084 Uiso 1 1 calc R U . . .
H7B H 1.1686 0.0960 0.5580 0.084 Uiso 1 1 calc R U . . .
H7C H 1.0781 0.1565 0.5814 0.084 Uiso 1 1 calc R U . . .
C11 C 1.1122(2) 0.21595(9) 0.81083(16) 0.0281(4) Uani 1 1 d . . . . .
C12 C 1.0721(3) 0.26907(11) 0.7371(2) 0.0459(6) Uani 1 1 d . . . . .
H12 H 0.9759 0.2719 0.6840 0.055 Uiso 1 1 calc R U . . .
C13 C 1.1724(3) 0.31806(13) 0.7409(2) 0.0587(7) Uani 1 1 d . . . . .
H13 H 1.1445 0.3542 0.6901 0.070 Uiso 1 1 calc R U . . .
C14 C 1.3119(3) 0.31469(12) 0.8175(2) 0.0514(6) Uani 1 1 d . . . . .
H14 H 1.3801 0.3483 0.8195 0.062 Uiso 1 1 calc R U . . .
C15 C 1.3519(2) 0.26251(11) 0.8909(2) 0.0450(5) Uani 1 1 d . . . . .
H15 H 1.4480 0.2602 0.9442 0.054 Uiso 1 1 calc R U . . .
C16 C 1.2530(2) 0.21321(10) 0.88800(18) 0.0356(4) Uani 1 1 d . . . . .
H16 H 1.2819 0.1773 0.9392 0.043 Uiso 1 1 calc R U . . .
C20 C 0.66570(19) -0.01867(9) 0.80872(16) 0.0280(4) Uani 1 1 d . . . . .
C21 C 0.60001(19) 0.04390(9) 0.80493(16) 0.0289(4) Uani 1 1 d . . . . .
C22 C 0.5979(2) 0.07490(10) 0.70082(17) 0.0331(4) Uani 1 1 d . . . . .
C23 C 0.6647(2) 0.03232(10) 0.64322(16) 0.0337(4) Uani 1 1 d . . . . .
C24 C 0.7077(2) -0.02574(10) 0.71002(16) 0.0313(4) Uani 1 1 d . . . . .
C25 C 0.6818(2) -0.06992(10) 0.89951(18) 0.0364(5) Uani 1 1 d . . . . .
H25A H 0.6633 -0.1133 0.8637 0.055 Uiso 0.42(2) 1 calc R U P . .
H25B H 0.6117 -0.0614 0.9391 0.055 Uiso 0.42(2) 1 calc R U P . .
H25C H 0.7809 -0.0685 0.9547 0.055 Uiso 0.42(2) 1 calc R U P . .
H25D H 0.7073 -0.0488 0.9747 0.055 Uiso 0.58(2) 1 calc R U P . .
H25E H 0.7589 -0.1007 0.8993 0.055 Uiso 0.58(2) 1 calc R U P . .
H25F H 0.5897 -0.0936 0.8837 0.055 Uiso 0.58(2) 1 calc R U P . .
C26 C 0.5305(2) 0.06807(11) 0.88921(19) 0.0397(5) Uani 1 1 d . . . . .
H26A H 0.4395 0.0443 0.8780 0.060 Uiso 1 1 calc R U . . .
H26B H 0.5099 0.1149 0.8772 0.060 Uiso 1 1 calc R U . . .
H26C H 0.5970 0.0608 0.9673 0.060 Uiso 1 1 calc R U . . .
C27 C 0.5330(2) 0.14048(11) 0.6570(2) 0.0460(6) Uani 1 1 d . . . . .
H27A H 0.5061 0.1631 0.7168 0.069 Uiso 1 1 calc R U . . .
H27B H 0.4461 0.1343 0.5895 0.069 Uiso 1 1 calc R U . . .
H27C H 0.6046 0.1668 0.6362 0.069 Uiso 1 1 calc R U . . .
C28 C 0.6827(3) 0.04536(13) 0.52856(17) 0.0496(6) Uani 1 1 d . . . . .
H28A H 0.5950 0.0310 0.4671 0.074 Uiso 1 1 calc R U . . .
H28B H 0.7673 0.0212 0.5236 0.074 Uiso 1 1 calc R U . . .
H28C H 0.6974 0.0923 0.5206 0.074 Uiso 1 1 calc R U . . .
C29 C 0.7687(3) -0.08715(11) 0.6765(2) 0.0449(5) Uani 1 1 d . . . . .
H29A H 0.8363 -0.1078 0.7451 0.067 Uiso 1 1 calc R U . . .
H29B H 0.8206 -0.0762 0.6234 0.067 Uiso 1 1 calc R U . . .
H29C H 0.6890 -0.1174 0.6393 0.067 Uiso 1 1 calc R U . . .

loop_
 _atom_site_aniso_label
 _atom_site_aniso_U_11
 _atom_site_aniso_U_22
 _atom_site_aniso_U_33
 _atom_site_aniso_U_23
 _atom_site_aniso_U_13
 _atom_site_aniso_U_12
Nb1 0.02109(7) 0.02220(8) 0.01984(7) 0.00007(6) 0.00442(5) -0.00216(7)
N1 0.0239(7) 0.0239(7) 0.0235(7) -0.0009(6) 0.0061(6) -0.0028(6)
C1 0.0256(9) 0.0252(9) 0.0241(8) 0.0031(7) 0.0061(7) -0.0007(7)
N2 0.0277(8) 0.0236(8) 0.0318(8) -0.0029(6) 0.0127(6) -0.0015(6)
C2 0.0338(10) 0.0233(9) 0.0420(11) -0.0054(8) 0.0179(9) -0.0025(8)
C3 0.0407(13) 0.0378(13) 0.0825(19) -0.0182(12) 0.0275(13) 0.0011(10)
C4 0.0804(19) 0.0416(13) 0.0386(12) -0.0117(10) 0.0160(12) 0.0073(13)
N3 0.0313(8) 0.0273(8) 0.0271(8) -0.0013(6) 0.0142(6) -0.0023(6)
C5 0.0314(10) 0.0372(11) 0.0327(10) -0.0035(8) 0.0153(8) -0.0011(8)
C6 0.0515(14) 0.0402(13) 0.0625(15) -0.0104(11) 0.0298(12) 0.0035(11)
C7 0.0615(16) 0.0760(19) 0.0425(13) 0.0038(13) 0.0327(12) 0.0043(14)
C11 0.0285(9) 0.0258(9) 0.0319(9) 0.0010(7) 0.0126(8) -0.0018(7)
C12 0.0377(12) 0.0416(13) 0.0523(14) 0.0178(10) 0.0067(10) -0.0045(10)
C13 0.0574(16) 0.0444(14) 0.0727(18) 0.0259(13) 0.0194(14) -0.0089(12)
C14 0.0456(13) 0.0430(13) 0.0711(17) 0.0000(12) 0.0268(13) -0.0176(11)
C15 0.0311(11) 0.0438(13) 0.0573(14) -0.0064(11) 0.0109(10) -0.0068(9)
C16 0.0327(10) 0.0309(10) 0.0411(11) 0.0009(9) 0.0095(9) -0.0017(8)
C20 0.0241(9) 0.0270(9) 0.0304(9) -0.0001(7) 0.0056(7) -0.0073(7)
C21 0.0211(8) 0.0309(10) 0.0332(9) 0.0019(7) 0.0069(7) -0.0033(7)
C22 0.0237(9) 0.0347(11) 0.0326(10) 0.0049(8) -0.0018(7) -0.0037(8)
C23 0.0310(10) 0.0406(11) 0.0233(9) -0.0011(8) 0.0008(7) -0.0112(8)
C24 0.0309(10) 0.0311(10) 0.0272(9) -0.0057(8) 0.0036(8) -0.0077(8)
C25 0.0363(10) 0.0294(11) 0.0431(11) 0.0059(8) 0.0130(9) -0.0064(8)
C26 0.0303(10) 0.0425(12) 0.0499(12) 0.0018(10) 0.0181(9) 0.0014(9)
C27 0.0378(12) 0.0404(12) 0.0493(13) 0.0143(10) 0.0002(10) 0.0038(10)
C28 0.0520(14) 0.0650(16) 0.0248(10) 0.0007(10) 0.0033(9) -0.0141(12)
C29 0.0528(14) 0.0388(12) 0.0424(12) -0.0140(10) 0.0151(11) -0.0057(10)

_geom_special_details
;
 All esds (except the esd in the dihedral angle between two l.s. planes)
 are estimated using the full covariance matrix.  The cell esds are taken
 into account individually in the estimation of esds in distances, angles
 and torsion angles; correlations between esds in cell parameters are only
 used when they are defined by crystal symmetry.  An approximate (isotropic)
 treatment of cell esds is used for estimating esds involving l.s. planes.
;

loop_
 _geom_bond_atom_site_label_1
 _geom_bond_atom_site_label_2
 _geom_bond_distance
 _geom_bond_site_symmetry_2
 _geom_bond_publ_flag
Nb1 N1 1.8230(14) . ?
Nb1 N3 2.2001(15) . ?
Nb1 N2 2.2138(15) . ?
Nb1 C20 2.3861(18) . ?
Nb1 C21 2.4094(18) . ?
Nb1 C24 2.4170(18) . ?
Nb1 C23 2.4773(18) . ?
Nb1 C22 2.4803(18) . ?
N1 N1 1.300(3) 3_757 ?
C1 N2 1.331(2) . ?
C1 N3 1.333(2) . ?
C1 C11 1.500(3) . ?
N2 C2 1.466(2) . ?
C2 C3 1.512(3) . ?
C2 C4 1.521(3) . ?
C2 H2 1.0000 . ?
C3 H3A 0.9800 . ?
C3 H3B 0.9800 . ?
C3 H3C 0.9800 . ?
C4 H4A 0.9800 . ?
C4 H4B 0.9800 . ?
C4 H4C 0.9800 . ?
N3 C5 1.468(2) . ?
C5 C7 1.518(3) . ?
C5 C6 1.520(3) . ?
C5 H5 1.0000 . ?
C6 H6A 0.9800 . ?
C6 H6B 0.9800 . ?
C6 H6C 0.9800 . ?
C7 H7A 0.9800 . ?
C7 H7B 0.9800 . ?
C7 H7C 0.9800 . ?
C11 C16 1.387(3) . ?
C11 C12 1.388(3) . ?
C12 C13 1.389(3) . ?
C12 H12 0.9500 . ?
C13 C14 1.375(4) . ?
C13 H13 0.9500 . ?
C14 C15 1.371(3) . ?
C14 H14 0.9500 . ?
C15 C16 1.386(3) . ?
C15 H15 0.9500 . ?
C16 H16 0.9500 . ?
C20 C24 1.420(3) . ?
C20 C21 1.424(3) . ?
C20 C25 1.506(3) . ?
C21 C22 1.431(3) . ?
C21 C26 1.504(3) . ?
C22 C23 1.414(3) . ?
C22 C27 1.504(3) . ?
C23 C24 1.427(3) . ?
C23 C28 1.512(3) . ?
C24 C29 1.505(3) . ?
C25 H25A 0.9800 . ?
C25 H25B 0.9800 . ?
C25 H25C 0.9800 . ?
C25 H25D 0.9800 . ?
C25 H25E 0.9800 . ?
C25 H25F 0.9800 . ?
C26 H26A 0.9800 . ?
C26 H26B 0.9800 . ?
C26 H26C 0.9800 . ?
C27 H27A 0.9800 . ?
C27 H27B 0.9800 . ?
C27 H27C 0.9800 . ?
C28 H28A 0.9800 . ?
C28 H28B 0.9800 . ?
C28 H28C 0.9800 . ?
C29 H29A 0.9800 . ?
C29 H29B 0.9800 . ?
C29 H29C 0.9800 . ?

loop_
 _geom_angle_atom_site_label_1
 _geom_angle_atom_site_label_2
 _geom_angle_atom_site_label_3
 _geom_angle
 _geom_angle_site_symmetry_1
 _geom_angle_site_symmetry_3
 _geom_angle_publ_flag
N1 Nb1 N3 104.65(6) . . ?
N1 Nb1 N2 107.38(6) . . ?
N3 Nb1 N2 60.35(6) . . ?
N1 Nb1 C20 90.74(6) . . ?
N3 Nb1 C20 147.23(6) . . ?
N2 Nb1 C20 142.14(6) . . ?
N1 Nb1 C21 110.84(7) . . ?
N3 Nb1 C21 144.51(6) . . ?
N2 Nb1 C21 107.77(6) . . ?
C20 Nb1 C21 34.54(6) . . ?
N1 Nb1 C24 105.54(7) . . ?
N3 Nb1 C24 112.86(6) . . ?
N2 Nb1 C24 147.00(6) . . ?
C20 Nb1 C24 34.38(7) . . ?
C21 Nb1 C24 57.15(7) . . ?
N1 Nb1 C23 139.40(7) . . ?
N3 Nb1 C23 95.70(6) . . ?
N2 Nb1 C23 113.22(6) . . ?
C20 Nb1 C23 56.33(6) . . ?
C21 Nb1 C23 56.22(7) . . ?
C24 Nb1 C23 33.89(7) . . ?
N1 Nb1 C22 144.35(7) . . ?
N3 Nb1 C22 110.67(6) . . ?
N2 Nb1 C22 94.36(6) . . ?
C20 Nb1 C22 56.39(6) . . ?
C21 Nb1 C22 33.99(6) . . ?
C24 Nb1 C22 56.10(7) . . ?
C23 Nb1 C22 33.13(7) . . ?
N1 N1 Nb1 167.17(17) 3_757 . ?
N2 C1 N3 112.74(16) . . ?
N2 C1 C11 123.72(17) . . ?
N3 C1 C11 123.53(17) . . ?
C1 N2 C2 122.33(16) . . ?
C1 N2 Nb1 92.33(11) . . ?
C2 N2 Nb1 137.21(12) . . ?
N2 C2 C3 109.69(17) . . ?
N2 C2 C4 109.63(16) . . ?
C3 C2 C4 111.0(2) . . ?
N2 C2 H2 108.8 . . ?
C3 C2 H2 108.8 . . ?
C4 C2 H2 108.8 . . ?
C2 C3 H3A 109.5 . . ?
C2 C3 H3B 109.5 . . ?
H3A C3 H3B 109.5 . . ?
C2 C3 H3C 109.5 . . ?
H3A C3 H3C 109.5 . . ?
H3B C3 H3C 109.5 . . ?
C2 C4 H4A 109.5 . . ?
C2 C4 H4B 109.5 . . ?
H4A C4 H4B 109.5 . . ?
C2 C4 H4C 109.5 . . ?
H4A C4 H4C 109.5 . . ?
H4B C4 H4C 109.5 . . ?
C1 N3 C5 122.70(16) . . ?
C1 N3 Nb1 92.88(11) . . ?
C5 N3 Nb1 139.74(13) . . ?
N3 C5 C7 111.36(17) . . ?
N3 C5 C6 108.86(17) . . ?
C7 C5 C6 111.1(2) . . ?
N3 C5 H5 108.5 . . ?
C7 C5 H5 108.5 . . ?
C6 C5 H5 108.5 . . ?
C5 C6 H6A 109.5 . . ?
C5 C6 H6B 109.5 . . ?
H6A C6 H6B 109.5 . . ?
C5 C6 H6C 109.5 . . ?
H6A C6 H6C 109.5 . . ?
H6B C6 H6C 109.5 . . ?
C5 C7 H7A 109.5 . . ?
C5 C7 H7B 109.5 . . ?
H7A C7 H7B 109.5 . . ?
C5 C7 H7C 109.5 . . ?
H7A C7 H7C 109.5 . . ?
H7B C7 H7C 109.5 . . ?
C16 C11 C12 118.79(19) . . ?
C16 C11 C1 121.42(17) . . ?
C12 C11 C1 119.77(17) . . ?
C11 C12 C13 120.1(2) . . ?
C11 C12 H12 120.0 . . ?
C13 C12 H12 120.0 . . ?
C14 C13 C12 120.6(2) . . ?
C14 C13 H13 119.7 . . ?
C12 C13 H13 119.7 . . ?
C15 C14 C13 119.6(2) . . ?
C15 C14 H14 120.2 . . ?
C13 C14 H14 120.2 . . ?
C14 C15 C16 120.5(2) . . ?
C14 C15 H15 119.8 . . ?
C16 C15 H15 119.8 . . ?
C15 C16 C11 120.5(2) . . ?
C15 C16 H16 119.8 . . ?
C11 C16 H16 119.8 . . ?
C24 C20 C21 108.54(17) . . ?
C24 C20 C25 125.73(18) . . ?
C21 C20 C25 125.67(18) . . ?
C24 C20 Nb1 74.00(11) . . ?
C21 C20 Nb1 73.63(10) . . ?
C25 C20 Nb1 120.55(12) . . ?
C20 C21 C22 107.40(17) . . ?
C20 C21 C26 124.97(18) . . ?
C22 C21 C26 127.26(18) . . ?
C20 C21 Nb1 71.84(10) . . ?
C22 C21 Nb1 75.72(11) . . ?
C26 C21 Nb1 123.49(13) . . ?
C23 C22 C21 108.14(17) . . ?
C23 C22 C27 125.12(19) . . ?
C21 C22 C27 126.7(2) . . ?
C23 C22 Nb1 73.31(10) . . ?
C21 C22 Nb1 70.29(10) . . ?
C27 C22 Nb1 123.38(13) . . ?
C22 C23 C24 108.35(17) . . ?
C22 C23 C28 125.6(2) . . ?
C24 C23 C28 126.0(2) . . ?
C22 C23 Nb1 73.55(10) . . ?
C24 C23 Nb1 70.74(10) . . ?
C28 C23 Nb1 123.07(14) . . ?
C20 C24 C23 107.55(18) . . ?
C20 C24 C29 125.15(19) . . ?
C23 C24 C29 126.87(19) . . ?
C20 C24 Nb1 71.62(10) . . ?
C23 C24 Nb1 75.37(11) . . ?
C29 C24 Nb1 124.46(14) . . ?
C20 C25 H25A 109.5 . . ?
C20 C25 H25B 109.5 . . ?
H25A C25 H25B 109.5 . . ?
C20 C25 H25C 109.5 . . ?
H25A C25 H25C 109.5 . . ?
H25B C25 H25C 109.5 . . ?
C20 C25 H25D 109.5 . . ?
H25A C25 H25D 141.1 . . ?
H25B C25 H25D 56.3 . . ?
H25C C25 H25D 56.3 . . ?
C20 C25 H25E 109.5 . . ?
H25A C25 H25E 56.3 . . ?
H25B C25 H25E 141.1 . . ?
H25C C25 H25E 56.3 . . ?
H25D C25 H25E 109.5 . . ?
C20 C25 H25F 109.5 . . ?
H25A C25 H25F 56.3 . . ?
H25B C25 H25F 56.3 . . ?
H25C C25 H25F 141.1 . . ?
H25D C25 H25F 109.5 . . ?
H25E C25 H25F 109.5 . . ?
C21 C26 H26A 109.5 . . ?
C21 C26 H26B 109.5 . . ?
H26A C26 H26B 109.5 . . ?
C21 C26 H26C 109.5 . . ?
H26A C26 H26C 109.5 . . ?
H26B C26 H26C 109.5 . . ?
C22 C27 H27A 109.5 . . ?
C22 C27 H27B 109.5 . . ?
H27A C27 H27B 109.5 . . ?
C22 C27 H27C 109.5 . . ?
H27A C27 H27C 109.5 . . ?
H27B C27 H27C 109.5 . . ?
C23 C28 H28A 109.5 . . ?
C23 C28 H28B 109.5 . . ?
H28A C28 H28B 109.5 . . ?
C23 C28 H28C 109.5 . . ?
H28A C28 H28C 109.5 . . ?
H28B C28 H28C 109.5 . . ?
C24 C29 H29A 109.5 . . ?
C24 C29 H29B 109.5 . . ?
H29A C29 H29B 109.5 . . ?
C24 C29 H29C 109.5 . . ?
H29A C29 H29C 109.5 . . ?
H29B C29 H29C 109.5 . . ?

loop_
 _geom_torsion_atom_site_label_1
 _geom_torsion_atom_site_label_2
 _geom_torsion_atom_site_label_3
 _geom_torsion_atom_site_label_4
 _geom_torsion
 _geom_torsion_site_symmetry_1
 _geom_torsion_site_symmetry_2
 _geom_torsion_site_symmetry_3
 _geom_torsion_site_symmetry_4
 _geom_torsion_publ_flag
N3 Nb1 N1 N1 -144.0(8) . . . 3_757 ?
N2 Nb1 N1 N1 153.0(8) . . . 3_757 ?
C20 Nb1 N1 N1 6.8(8) . . . 3_757 ?
C21 Nb1 N1 N1 35.6(8) . . . 3_757 ?
C24 Nb1 N1 N1 -24.7(8) . . . 3_757 ?
C23 Nb1 N1 N1 -26.4(9) . . . 3_757 ?
C22 Nb1 N1 N1 28.1(9) . . . 3_757 ?
N3 C1 N2 C2 165.76(16) . . . . ?
C11 C1 N2 C2 -13.4(3) . . . . ?
N3 C1 N2 Nb1 12.26(15) . . . . ?
C11 C1 N2 Nb1 -166.94(15) . . . . ?
C1 N2 C2 C3 144.32(19) . . . . ?
Nb1 N2 C2 C3 -76.7(2) . . . . ?
C1 N2 C2 C4 -93.5(2) . . . . ?
Nb1 N2 C2 C4 45.5(3) . . . . ?
N2 C1 N3 C5 -172.44(16) . . . . ?
C11 C1 N3 C5 6.8(3) . . . . ?
N2 C1 N3 Nb1 -12.34(15) . . . . ?
C11 C1 N3 Nb1 166.86(15) . . . . ?
C1 N3 C5 C7 -88.7(2) . . . . ?
Nb1 N3 C5 C7 123.0(2) . . . . ?
C1 N3 C5 C6 148.41(18) . . . . ?
Nb1 N3 C5 C6 0.1(3) . . . . ?
N2 C1 C11 C16 101.8(2) . . . . ?
N3 C1 C11 C16 -77.3(2) . . . . ?
N2 C1 C11 C12 -79.6(3) . . . . ?
N3 C1 C11 C12 101.3(2) . . . . ?
C16 C11 C12 C13 0.4(4) . . . . ?
C1 C11 C12 C13 -178.3(2) . . . . ?
C11 C12 C13 C14 -0.2(4) . . . . ?
C12 C13 C14 C15 -0.2(4) . . . . ?
C13 C14 C15 C16 0.3(4) . . . . ?
C14 C15 C16 C11 -0.1(4) . . . . ?
C12 C11 C16 C15 -0.3(3) . . . . ?
C1 C11 C16 C15 178.4(2) . . . . ?
C24 C20 C21 C22 1.7(2) . . . . ?
C25 C20 C21 C22 -175.84(17) . . . . ?
Nb1 C20 C21 C22 67.99(12) . . . . ?
C24 C20 C21 C26 175.04(17) . . . . ?
C25 C20 C21 C26 -2.5(3) . . . . ?
Nb1 C20 C21 C26 -118.63(18) . . . . ?
C24 C20 C21 Nb1 -66.33(13) . . . . ?
C25 C20 C21 Nb1 116.18(18) . . . . ?
C20 C21 C22 C23 -1.4(2) . . . . ?
C26 C21 C22 C23 -174.54(18) . . . . ?
Nb1 C21 C22 C23 64.00(13) . . . . ?
C20 C21 C22 C27 177.12(18) . . . . ?
C26 C21 C22 C27 3.9(3) . . . . ?
Nb1 C21 C22 C27 -117.51(19) . . . . ?
C20 C21 C22 Nb1 -65.36(12) . . . . ?
C26 C21 C22 Nb1 121.45(19) . . . . ?
C21 C22 C23 C24 0.6(2) . . . . ?
C27 C22 C23 C24 -177.96(18) . . . . ?
Nb1 C22 C23 C24 62.60(13) . . . . ?
C21 C22 C23 C28 178.71(18) . . . . ?
C27 C22 C23 C28 0.2(3) . . . . ?
Nb1 C22 C23 C28 -119.24(19) . . . . ?
C21 C22 C23 Nb1 -62.05(12) . . . . ?
C27 C22 C23 Nb1 119.44(19) . . . . ?
C21 C20 C24 C23 -1.3(2) . . . . ?
C25 C20 C24 C23 176.17(17) . . . . ?
Nb1 C20 C24 C23 -67.40(13) . . . . ?
C21 C20 C24 C29 -174.23(18) . . . . ?
C25 C20 C24 C29 3.3(3) . . . . ?
Nb1 C20 C24 C29 119.69(19) . . . . ?
C21 C20 C24 Nb1 66.08(12) . . . . ?
C25 C20 C24 Nb1 -116.43(18) . . . . ?
C22 C23 C24 C20 0.5(2) . . . . ?
C28 C23 C24 C20 -177.68(18) . . . . ?
Nb1 C23 C24 C20 64.89(12) . . . . ?
C22 C23 C24 C29 173.22(19) . . . . ?
C28 C23 C24 C29 -4.9(3) . . . . ?
Nb1 C23 C24 C29 -122.4(2) . . . . ?
C22 C23 C24 Nb1 -64.42(13) . . . . ?
C28 C23 C24 Nb1 117.43(19) . . . . ?

_refine_diff_density_max    0.795
_refine_diff_density_min   -0.427
_refine_diff_density_rms    0.064

_diffrn_radiation_monochromator       graphite
_symmetry_cell_setting                Monoclinic
_symmetry_space_group_name_H-M        'P 21/n'
_diffrn_orient_matrix_type            standard
_diffrn_orient_matrix_UB_11          -0.1018677
_diffrn_orient_matrix_UB_12           0.0005713
_diffrn_orient_matrix_UB_13           0.0018957
_diffrn_orient_matrix_UB_21          -0.0376337
_diffrn_orient_matrix_UB_22          -0.0120524
_diffrn_orient_matrix_UB_23          -0.0829531
_diffrn_orient_matrix_UB_31           0.0083550
_diffrn_orient_matrix_UB_32          -0.0474155
_diffrn_orient_matrix_UB_33           0.0210975
_diffrn_source_voltage                50.00
_diffrn_source_current                30.00
_diffrn_measurement_specimen_support  'MiTeGen loop'
_diffrn_detector                      'CCD area detector'
_diffrn_detector_type                 'Bruker Smart Apex II'
_iucr_refine_instructions_details     'See _shelx_res_file'

#_______________________________________________________________________________
#
_publ_section_references
;
Bruker (2010). Apex2. Bruker AXS Inc., Madison, Wisconsin, USA.

Sheldrick, G. M. (2008). Acta Cryst. A64, 112-122.

Sheldrick, G. M. (2012). SHELXL-2012. University of G\"ottingen, Germany.

Spek, A. L. (1990). Acta Cryst., A46, C-34.
;
data_cmpd_cis_3b

_audit_creation_method            'SHELXL-2012 & ZCIF'
_chemical_name_systematic
;
cmpd_cis_3b
;
_chemical_name_common             cmpd_cis_3b
_chemical_formula_moiety          'C46 H68 N6 Ta2'
_chemical_formula_sum             'C46 H68 N6 Ta2'
_chemical_formula_weight          1066.96

loop_
 _atom_type_symbol
 _atom_type_description
 _atom_type_scat_dispersion_real
 _atom_type_scat_dispersion_imag
 _atom_type_scat_source
 'C'  'C'   0.0033   0.0016
 'International Tables Vol C Tables 4.2.6.8 and 6.1.1.4'
 'H'  'H'   0.0000   0.0000
 'International Tables Vol C Tables 4.2.6.8 and 6.1.1.4'
 'N'  'N'   0.0061   0.0033
 'International Tables Vol C Tables 4.2.6.8 and 6.1.1.4'
 'Ta'  'Ta'  -0.7052   6.5227
 'International Tables Vol C Tables 4.2.6.8 and 6.1.1.4'

_space_group_crystal_system       monoclinic
_space_group_IT_number            15
_space_group_name_H-M_alt         'C 2/c'
_space_group_name_Hall            '-C 2yc'

_shelx_space_group_comment
;
The symmetry employed for this shelxl refinement is uniquely defined
by the following loop, which should always be used as a source of
symmetry information in preference to the above space-group names.
They are only intended as comments.
;

loop_
 _space_group_symop_operation_xyz
 'x, y, z'
 '-x, y, -z+1/2'
 'x+1/2, y+1/2, z'
 '-x+1/2, y+1/2, -z+1/2'
 '-x, -y, -z'
 'x, -y, z-1/2'
 '-x+1/2, -y+1/2, -z'
 'x+1/2, -y+1/2, z-1/2'

_cell_length_a                    13.3148(10)
_cell_length_b                    17.9841(13)
_cell_length_c                    18.9403(14)
_cell_angle_alpha                 90
_cell_angle_beta                  102.7560(10)
_cell_angle_gamma                 90
_cell_volume                      4423.4(6)
_cell_formula_units_Z             4
_cell_measurement_temperature     150(2)
_cell_measurement_reflns_used     15610
_cell_measurement_theta_min       2.2
_cell_measurement_theta_max       32.0

_exptl_crystal_description        prism
_exptl_crystal_colour             yellow
_exptl_crystal_density_meas       ?
_exptl_crystal_density_method     'not measured'
_exptl_crystal_density_diffrn     1.602
_exptl_crystal_F_000              2128
_exptl_transmission_factor_min    ?
_exptl_transmission_factor_max    ?
_exptl_crystal_size_max           0.175
_exptl_crystal_size_mid           0.13
_exptl_crystal_size_min           0.05
_exptl_absorpt_coefficient_mu     4.982
_shelx_estimated_absorpt_T_min    0.476
_shelx_estimated_absorpt_T_max    0.789
_exptl_absorpt_correction_type    multi-scan
_exptl_absorpt_correction_T_min   0.474
_exptl_absorpt_correction_T_max   0.780
_exptl_absorpt_process_details    'SADABS (Sheldrick, 2008)'

_exptl_special_details
;
 ?
;

_diffrn_ambient_temperature       150(2)
_diffrn_radiation_wavelength      0.71073
_diffrn_radiation_type            MoK\a
_diffrn_source                    'sealed tube'
_diffrn_measurement_device_type   'Bruker Smart Apex II diffractometer'
_diffrn_measurement_method        '\f and \w scans'
_diffrn_detector_area_resol_mean  8.333
_diffrn_reflns_number             32820
_diffrn_reflns_av_unetI/netI      0.0193
_diffrn_reflns_av_R_equivalents   0.0258
_diffrn_reflns_limit_h_min        -18
_diffrn_reflns_limit_h_max        18
_diffrn_reflns_limit_k_min        -25
_diffrn_reflns_limit_k_max        25
_diffrn_reflns_limit_l_min        -26
_diffrn_reflns_limit_l_max        26
_diffrn_reflns_theta_min          1.934
_diffrn_reflns_theta_max          29.999
_diffrn_reflns_theta_full         25.242
_diffrn_measured_fraction_theta_max   0.999
_diffrn_measured_fraction_theta_full  1.000
_diffrn_reflns_Laue_measured_fraction_max    0.999
_diffrn_reflns_Laue_measured_fraction_full   1.000
_diffrn_reflns_point_group_measured_fraction_max   0.999
_diffrn_reflns_point_group_measured_fraction_full  1.000
_reflns_number_total              6446
_reflns_number_gt                 5692
_reflns_threshold_expression      'I > 2\s(I)'
_reflns_Friedel_coverage          0.000
_reflns_Friedel_fraction_max      .
_reflns_Friedel_fraction_full     .

_reflns_special_details
;
 Reflections were merged by SHELXL according to the crystal
 class for the calculation of statistics and refinement.

 _reflns_Friedel_fraction is defined as the number of unique
 Friedel pairs measured divided by the number that would be
 possible theoretically, ignoring centric projections and
 systematic absences.
;

_computing_data_collection        'Apex2 (Bruker, 2010)'
_computing_cell_refinement        Apex2
_computing_data_reduction         'Apex2, Saint'
_computing_structure_solution     'ShelXS-97 (Sheldrick, 2008)'
_computing_structure_refinement   'ShelXL-2012 (Sheldrick, 2012)'
_computing_molecular_graphics     'XSHEL (Bruker, 2004)'
_computing_publication_material   'Apex2, SHELXL-2012'

_refine_special_details
;
 ?
;
_refine_ls_structure_factor_coef  Fsqd
_refine_ls_matrix_type            full
_refine_ls_weighting_scheme       calc
_refine_ls_weighting_details
;
 w=1/[\s^2^(Fo^2^)+(0.0065P)^2^+14.9030P]
 where P=(Fo^2^+2Fc^2^)/3
;
_atom_sites_solution_primary      direct
_atom_sites_solution_secondary    difmap
_atom_sites_solution_hydrogens    geom
_refine_ls_hydrogen_treatment     constr
_refine_ls_extinction_method      none
_refine_ls_extinction_coef        .
_refine_ls_number_reflns          6446
_refine_ls_number_parameters      254
_refine_ls_number_restraints      0
_refine_ls_R_factor_all           0.0239
_refine_ls_R_factor_gt            0.0191
_refine_ls_wR_factor_ref          0.0383
_refine_ls_wR_factor_gt           0.0367
_refine_ls_goodness_of_fit_ref    1.000
_refine_ls_restrained_S_all       1.000
_refine_ls_shift/su_max           0.006
_refine_ls_shift/su_mean          0.000

loop_
 _atom_site_label
 _atom_site_type_symbol
 _atom_site_fract_x
 _atom_site_fract_y
 _atom_site_fract_z
 _atom_site_U_iso_or_equiv
 _atom_site_adp_type
 _atom_site_occupancy
 _atom_site_site_symmetry_order
 _atom_site_calc_flag
 _atom_site_refinement_flags_posn
 _atom_site_refinement_flags_adp
 _atom_site_refinement_flags_occupancy
 _atom_site_disorder_assembly
 _atom_site_disorder_group
Ta1 Ta 0.54274(2) 0.14135(2) 0.68833(2) 0.01744(3) Uani 1 1 d . . . . .
N1 N 0.40810(14) 0.13679(12) 0.70952(10) 0.0244(4) Uani 1 1 d . . . . .
C1 C 0.58839(17) 0.28180(12) 0.64875(11) 0.0209(4) Uani 1 1 d . . . . .
C2 C 0.60116(17) 0.36265(13) 0.63163(12) 0.0260(5) Uani 1 1 d . . . . .
C3 C 0.5880(2) 0.41807(15) 0.67961(14) 0.0360(6) Uani 1 1 d . . . . .
H3 H 0.5755 0.4050 0.7255 0.043 Uiso 1 1 calc R U . . .
C4 C 0.5928(3) 0.49266(16) 0.66125(16) 0.0468(8) Uani 1 1 d . . . . .
H4 H 0.5821 0.5300 0.6943 0.056 Uiso 1 1 calc R U . . .
C5 C 0.6130(2) 0.51262(17) 0.59595(19) 0.0514(9) Uani 1 1 d . . . . .
H5 H 0.6162 0.5637 0.5837 0.062 Uiso 1 1 calc R U . . .
C6 C 0.6285(2) 0.45845(18) 0.54803(18) 0.0481(8) Uani 1 1 d . . . . .
H6 H 0.6433 0.4722 0.5030 0.058 Uiso 1 1 calc R U . . .
C7 C 0.6226(2) 0.38354(16) 0.56545(15) 0.0369(6) Uani 1 1 d . . . . .
H7 H 0.6331 0.3465 0.5321 0.044 Uiso 1 1 calc R U . . .
N11 N 0.49941(14) 0.24533(11) 0.62979(10) 0.0238(4) Uani 1 1 d . . . . .
C12 C 0.39828(17) 0.27446(13) 0.59224(11) 0.0225(4) Uani 1 1 d . . . . .
H12 H 0.3502 0.2310 0.5854 0.027 Uiso 1 1 calc R U . . .
C13 C 0.3540(2) 0.33063(15) 0.63716(14) 0.0322(5) Uani 1 1 d . . . . .
H13A H 0.3615 0.3117 0.6866 0.048 Uiso 1 1 calc R U . . .
H13B H 0.2808 0.3385 0.6155 0.048 Uiso 1 1 calc R U . . .
H13C H 0.3910 0.3779 0.6384 0.048 Uiso 1 1 calc R U . . .
C14 C 0.3943(2) 0.30544(16) 0.51640(13) 0.0354(6) Uani 1 1 d . . . . .
H14A H 0.4269 0.3546 0.5204 0.053 Uiso 1 1 calc R U . . .
H14B H 0.3223 0.3098 0.4901 0.053 Uiso 1 1 calc R U . . .
H14C H 0.4310 0.2718 0.4901 0.053 Uiso 1 1 calc R U . . .
N15 N 0.66233(14) 0.23835(11) 0.68494(10) 0.0220(4) Uani 1 1 d . . . . .
C16 C 0.76480(17) 0.26814(14) 0.71860(13) 0.0268(5) Uani 1 1 d . . . . .
H16 H 0.7553 0.3196 0.7361 0.032 Uiso 1 1 calc R U . . .
C17 C 0.8143(2) 0.22084(16) 0.78432(14) 0.0358(6) Uani 1 1 d . . . . .
H17A H 0.7653 0.2142 0.8155 0.054 Uiso 1 1 calc R U . . .
H17B H 0.8762 0.2459 0.8116 0.054 Uiso 1 1 calc R U . . .
H17C H 0.8332 0.1722 0.7679 0.054 Uiso 1 1 calc R U . . .
C18 C 0.8357(2) 0.27306(17) 0.66532(15) 0.0383(6) Uani 1 1 d . . . . .
H18A H 0.9024 0.2934 0.6901 0.057 Uiso 1 1 calc R U . . .
H18B H 0.8045 0.3056 0.6249 0.057 Uiso 1 1 calc R U . . .
H18C H 0.8455 0.2233 0.6469 0.057 Uiso 1 1 calc R U . . .
C20 C 0.59720(19) 0.10620(13) 0.56879(12) 0.0257(5) Uani 1 1 d . . . . .
C21 C 0.49329(18) 0.08284(13) 0.55916(11) 0.0257(5) Uani 1 1 d . . . . .
C22 C 0.48811(18) 0.02850(13) 0.61188(12) 0.0251(5) Uani 1 1 d . . . . .
C23 C 0.58984(19) 0.01762(13) 0.65483(12) 0.0254(5) Uani 1 1 d . . . . .
C24 C 0.65722(18) 0.06493(13) 0.62702(12) 0.0253(5) Uani 1 1 d . . . . .
C25 C 0.6373(2) 0.16199(15) 0.52266(14) 0.0357(6) Uani 1 1 d . . . . .
H25A H 0.6360 0.2117 0.5436 0.054 Uiso 0.58(3) 1 calc R U P . .
H25B H 0.5939 0.1614 0.4736 0.054 Uiso 0.58(3) 1 calc R U P . .
H25C H 0.7082 0.1492 0.5207 0.054 Uiso 0.58(3) 1 calc R U P . .
H25D H 0.6561 0.1365 0.4817 0.054 Uiso 0.42(3) 1 calc R U P . .
H25E H 0.6982 0.1868 0.5517 0.054 Uiso 0.42(3) 1 calc R U P . .
H25F H 0.5839 0.1990 0.5045 0.054 Uiso 0.42(3) 1 calc R U P . .
C26 C 0.4036(2) 0.10531(16) 0.50031(13) 0.0377(6) Uani 1 1 d . . . . .
H26A H 0.3838 0.0637 0.4667 0.056 Uiso 1 1 calc R U . . .
H26B H 0.4230 0.1481 0.4741 0.056 Uiso 1 1 calc R U . . .
H26C H 0.3455 0.1189 0.5216 0.056 Uiso 1 1 calc R U . . .
C27 C 0.3924(2) -0.01362(16) 0.61524(15) 0.0378(6) Uani 1 1 d . . . . .
H27A H 0.3489 0.0168 0.6394 0.057 Uiso 1 1 calc R U . . .
H27B H 0.4109 -0.0598 0.6425 0.057 Uiso 1 1 calc R U . . .
H27C H 0.3546 -0.0255 0.5660 0.057 Uiso 1 1 calc R U . . .
C28 C 0.6255(2) -0.04576(14) 0.70617(14) 0.0361(6) Uani 1 1 d . . . . .
H28A H 0.6478 -0.0872 0.6797 0.054 Uiso 1 1 calc R U . . .
H28B H 0.5686 -0.0621 0.7277 0.054 Uiso 1 1 calc R U . . .
H28C H 0.6832 -0.0292 0.7446 0.054 Uiso 1 1 calc R U . . .
C29 C 0.7726(2) 0.06263(17) 0.64928(15) 0.0384(6) Uani 1 1 d . . . . .
H29A H 0.7978 0.0168 0.6312 0.058 Uiso 1 1 calc R U . . .
H29B H 0.7939 0.0639 0.7022 0.058 Uiso 1 1 calc R U . . .
H29C H 0.8015 0.1057 0.6290 0.058 Uiso 1 1 calc R U . . .

loop_
 _atom_site_aniso_label
 _atom_site_aniso_U_11
 _atom_site_aniso_U_22
 _atom_site_aniso_U_33
 _atom_site_aniso_U_23
 _atom_site_aniso_U_13
 _atom_site_aniso_U_12
Ta1 0.02261(4) 0.01523(4) 0.01481(4) -0.00007(3) 0.00485(3) 0.00187(4)
N1 0.0225(8) 0.0319(11) 0.0189(8) -0.0017(8) 0.0050(7) 0.0056(8)
C1 0.0250(10) 0.0216(11) 0.0176(9) 0.0022(8) 0.0076(8) -0.0014(8)
C2 0.0241(10) 0.0223(11) 0.0295(11) 0.0081(9) 0.0011(9) -0.0027(9)
C3 0.0474(15) 0.0249(13) 0.0300(12) 0.0028(10) -0.0039(11) -0.0026(11)
C4 0.064(2) 0.0228(13) 0.0436(16) 0.0024(12) -0.0102(14) -0.0034(13)
C5 0.0500(18) 0.0267(14) 0.066(2) 0.0204(14) -0.0128(15) -0.0116(13)
C6 0.0450(16) 0.0458(18) 0.0528(18) 0.0283(15) 0.0094(14) -0.0091(14)
C7 0.0356(13) 0.0393(15) 0.0377(13) 0.0120(12) 0.0122(11) -0.0029(12)
N11 0.0216(9) 0.0199(9) 0.0299(10) 0.0021(8) 0.0054(8) 0.0004(7)
C12 0.0229(10) 0.0217(11) 0.0217(10) 0.0013(8) 0.0026(8) 0.0013(8)
C13 0.0302(12) 0.0325(13) 0.0327(12) -0.0049(10) 0.0043(10) 0.0061(10)
C14 0.0340(13) 0.0436(16) 0.0276(12) 0.0091(11) 0.0049(10) 0.0018(12)
N15 0.0227(9) 0.0218(9) 0.0216(8) 0.0039(7) 0.0052(7) -0.0019(7)
C16 0.0224(10) 0.0275(12) 0.0292(11) 0.0033(9) 0.0029(9) -0.0033(9)
C17 0.0285(12) 0.0386(15) 0.0361(13) 0.0083(11) -0.0018(10) -0.0012(11)
C18 0.0299(13) 0.0433(16) 0.0439(15) 0.0089(12) 0.0126(11) -0.0064(12)
C20 0.0374(13) 0.0220(11) 0.0209(10) -0.0014(8) 0.0132(9) 0.0030(10)
C21 0.0322(12) 0.0267(12) 0.0181(9) -0.0065(9) 0.0055(9) 0.0059(10)
C22 0.0315(12) 0.0219(11) 0.0232(10) -0.0075(9) 0.0088(9) 0.0008(9)
C23 0.0365(12) 0.0206(11) 0.0214(10) -0.0028(8) 0.0112(9) 0.0048(9)
C24 0.0289(11) 0.0254(12) 0.0235(10) -0.0028(9) 0.0099(9) 0.0051(9)
C25 0.0507(16) 0.0348(14) 0.0267(12) 0.0023(10) 0.0198(11) 0.0041(12)
C26 0.0452(15) 0.0366(15) 0.0260(12) -0.0088(11) -0.0032(11) 0.0103(12)
C27 0.0400(14) 0.0356(15) 0.0394(14) -0.0121(12) 0.0124(12) -0.0103(12)
C28 0.0531(17) 0.0257(13) 0.0322(13) 0.0032(10) 0.0152(12) 0.0131(12)
C29 0.0318(13) 0.0414(16) 0.0431(15) -0.0013(12) 0.0107(11) 0.0080(12)

_geom_special_details
;
 All esds (except the esd in the dihedral angle between two l.s. planes)
 are estimated using the full covariance matrix.  The cell esds are taken
 into account individually in the estimation of esds in distances, angles
 and torsion angles; correlations between esds in cell parameters are only
 used when they are defined by crystal symmetry.  An approximate (isotropic)
 treatment of cell esds is used for estimating esds involving l.s. planes.
;

loop_
 _geom_bond_atom_site_label_1
 _geom_bond_atom_site_label_2
 _geom_bond_distance
 _geom_bond_site_symmetry_2
 _geom_bond_publ_flag
Ta1 N1 1.9024(18) 2_656 ?
Ta1 N1 1.9232(19) . ?
Ta1 N11 2.1856(19) . ?
Ta1 N15 2.3723(19) . ?
Ta1 C23 2.434(2) . ?
Ta1 C22 2.506(2) . ?
Ta1 C24 2.519(2) . ?
Ta1 C20 2.603(2) . ?
Ta1 C21 2.610(2) . ?
Ta1 Ta1 2.8153(2) 2_656 ?
N1 Ta1 1.9025(18) 2_656 ?
C1 N15 1.324(3) . ?
C1 N11 1.332(3) . ?
C1 C2 1.507(3) . ?
C2 C3 1.386(4) . ?
C2 C7 1.397(3) . ?
C3 C4 1.391(4) . ?
C3 H3 0.9500 . ?
C4 C5 1.370(5) . ?
C4 H4 0.9500 . ?
C5 C6 1.378(5) . ?
C5 H5 0.9500 . ?
C6 C7 1.393(4) . ?
C6 H6 0.9500 . ?
C7 H7 0.9500 . ?
N11 C12 1.473(3) . ?
C12 C13 1.521(3) . ?
C12 C14 1.531(3) . ?
C12 H12 1.0000 . ?
C13 H13A 0.9800 . ?
C13 H13B 0.9800 . ?
C13 H13C 0.9800 . ?
C14 H14A 0.9800 . ?
C14 H14B 0.9800 . ?
C14 H14C 0.9800 . ?
N15 C16 1.473(3) . ?
C16 C18 1.529(3) . ?
C16 C17 1.531(3) . ?
C16 H16 1.0000 . ?
C17 H17A 0.9800 . ?
C17 H17B 0.9800 . ?
C17 H17C 0.9800 . ?
C18 H18A 0.9800 . ?
C18 H18B 0.9800 . ?
C18 H18C 0.9800 . ?
C20 C21 1.419(3) . ?
C20 C24 1.420(3) . ?
C20 C25 1.504(3) . ?
C21 C22 1.410(3) . ?
C21 C26 1.498(3) . ?
C22 C23 1.431(3) . ?
C22 C27 1.496(3) . ?
C23 C24 1.420(3) . ?
C23 C28 1.505(3) . ?
C24 C29 1.501(3) . ?
C25 H25A 0.9800 . ?
C25 H25B 0.9800 . ?
C25 H25C 0.9800 . ?
C25 H25D 0.9800 . ?
C25 H25E 0.9800 . ?
C25 H25F 0.9800 . ?
C26 H26A 0.9800 . ?
C26 H26B 0.9800 . ?
C26 H26C 0.9800 . ?
C27 H27A 0.9800 . ?
C27 H27B 0.9800 . ?
C27 H27C 0.9800 . ?
C28 H28A 0.9800 . ?
C28 H28B 0.9800 . ?
C28 H28C 0.9800 . ?
C29 H29A 0.9800 . ?
C29 H29B 0.9800 . ?
C29 H29C 0.9800 . ?

loop_
 _geom_angle_atom_site_label_1
 _geom_angle_atom_site_label_2
 _geom_angle_atom_site_label_3
 _geom_angle
 _geom_angle_site_symmetry_1
 _geom_angle_site_symmetry_3
 _geom_angle_publ_flag
N1 Ta1 N1 85.02(8) 2_656 . ?
N1 Ta1 N11 123.08(8) 2_656 . ?
N1 Ta1 N11 89.34(8) . . ?
N1 Ta1 N15 88.68(7) 2_656 . ?
N1 Ta1 N15 134.36(8) . . ?
N11 Ta1 N15 57.36(7) . . ?
N1 Ta1 C23 100.09(8) 2_656 . ?
N1 Ta1 C23 108.73(9) . . ?
N11 Ta1 C23 134.78(7) . . ?
N15 Ta1 C23 116.88(7) . . ?
N1 Ta1 C22 122.93(8) 2_656 . ?
N1 Ta1 C22 85.47(8) . . ?
N11 Ta1 C22 112.91(7) . . ?
N15 Ta1 C22 133.69(7) . . ?
C23 Ta1 C22 33.64(8) . . ?
N1 Ta1 C24 109.76(8) 2_656 . ?
N1 Ta1 C24 139.45(8) . . ?
N11 Ta1 C24 110.59(7) . . ?
N15 Ta1 C24 84.87(7) . . ?
C23 Ta1 C24 33.26(8) . . ?
C22 Ta1 C24 54.52(8) . . ?
N1 Ta1 C20 140.78(8) 2_656 . ?
N1 Ta1 C20 128.50(8) . . ?
N11 Ta1 C20 81.92(7) . . ?
N15 Ta1 C20 80.65(7) . . ?
C23 Ta1 C20 54.12(7) . . ?
C22 Ta1 C20 53.26(8) . . ?
C24 Ta1 C20 32.14(7) . . ?
N1 Ta1 C21 153.47(8) 2_656 . ?
N1 Ta1 C21 97.15(8) . . ?
N11 Ta1 C21 83.44(7) . . ?
N15 Ta1 C21 107.63(7) . . ?
C23 Ta1 C21 54.08(7) . . ?
C22 Ta1 C21 31.90(7) . . ?
C24 Ta1 C21 53.20(7) . . ?
C20 Ta1 C21 31.58(7) . . ?
N1 Ta1 Ta1 42.91(6) 2_656 2_656 ?
N1 Ta1 Ta1 42.33(5) . 2_656 ?
N11 Ta1 Ta1 108.13(5) . 2_656 ?
N15 Ta1 Ta1 114.78(4) . 2_656 ?
C23 Ta1 Ta1 113.02(5) . 2_656 ?
C22 Ta1 Ta1 111.13(5) . 2_656 ?
C24 Ta1 Ta1 141.20(5) . 2_656 ?
C20 Ta1 Ta1 164.35(5) . 2_656 ?
C21 Ta1 Ta1 135.49(6) . 2_656 ?
Ta1 N1 Ta1 94.77(8) 2_656 . ?
N15 C1 N11 111.4(2) . . ?
N15 C1 C2 125.1(2) . . ?
N11 C1 C2 123.6(2) . . ?
C3 C2 C7 118.4(2) . . ?
C3 C2 C1 121.1(2) . . ?
C7 C2 C1 120.5(2) . . ?
C2 C3 C4 120.7(3) . . ?
C2 C3 H3 119.7 . . ?
C4 C3 H3 119.7 . . ?
C5 C4 C3 120.5(3) . . ?
C5 C4 H4 119.8 . . ?
C3 C4 H4 119.8 . . ?
C4 C5 C6 119.8(3) . . ?
C4 C5 H5 120.1 . . ?
C6 C5 H5 120.1 . . ?
C5 C6 C7 120.2(3) . . ?
C5 C6 H6 119.9 . . ?
C7 C6 H6 119.9 . . ?
C6 C7 C2 120.4(3) . . ?
C6 C7 H7 119.8 . . ?
C2 C7 H7 119.8 . . ?
C1 N11 C12 128.22(19) . . ?
C1 N11 Ta1 99.50(14) . . ?
C12 N11 Ta1 131.29(14) . . ?
N11 C12 C13 113.08(18) . . ?
N11 C12 C14 114.92(19) . . ?
C13 C12 C14 110.2(2) . . ?
N11 C12 H12 106.0 . . ?
C13 C12 H12 106.0 . . ?
C14 C12 H12 106.0 . . ?
C12 C13 H13A 109.5 . . ?
C12 C13 H13B 109.5 . . ?
H13A C13 H13B 109.5 . . ?
C12 C13 H13C 109.5 . . ?
H13A C13 H13C 109.5 . . ?
H13B C13 H13C 109.5 . . ?
C12 C14 H14A 109.5 . . ?
C12 C14 H14B 109.5 . . ?
H14A C14 H14B 109.5 . . ?
C12 C14 H14C 109.5 . . ?
H14A C14 H14C 109.5 . . ?
H14B C14 H14C 109.5 . . ?
C1 N15 C16 121.41(19) . . ?
C1 N15 Ta1 91.22(13) . . ?
C16 N15 Ta1 144.95(14) . . ?
N15 C16 C18 112.5(2) . . ?
N15 C16 C17 109.94(19) . . ?
C18 C16 C17 110.5(2) . . ?
N15 C16 H16 107.9 . . ?
C18 C16 H16 107.9 . . ?
C17 C16 H16 107.9 . . ?
C16 C17 H17A 109.5 . . ?
C16 C17 H17B 109.5 . . ?
H17A C17 H17B 109.5 . . ?
C16 C17 H17C 109.5 . . ?
H17A C17 H17C 109.5 . . ?
H17B C17 H17C 109.5 . . ?
C16 C18 H18A 109.5 . . ?
C16 C18 H18B 109.5 . . ?
H18A C18 H18B 109.5 . . ?
C16 C18 H18C 109.5 . . ?
H18A C18 H18C 109.5 . . ?
H18B C18 H18C 109.5 . . ?
C21 C20 C24 108.1(2) . . ?
C21 C20 C25 125.8(2) . . ?
C24 C20 C25 126.1(2) . . ?
C21 C20 Ta1 74.50(12) . . ?
C24 C20 Ta1 70.64(12) . . ?
C25 C20 Ta1 123.11(16) . . ?
C22 C21 C20 108.2(2) . . ?
C22 C21 C26 124.0(2) . . ?
C20 C21 C26 127.6(2) . . ?
C22 C21 Ta1 69.96(12) . . ?
C20 C21 Ta1 73.93(12) . . ?
C26 C21 Ta1 125.69(16) . . ?
C21 C22 C23 108.0(2) . . ?
C21 C22 C27 123.8(2) . . ?
C23 C22 C27 127.9(2) . . ?
C21 C22 Ta1 78.14(13) . . ?
C23 C22 Ta1 70.41(12) . . ?
C27 C22 Ta1 121.79(16) . . ?
C24 C23 C22 107.7(2) . . ?
C24 C23 C28 124.0(2) . . ?
C22 C23 C28 126.5(2) . . ?
C24 C23 Ta1 76.65(13) . . ?
C22 C23 Ta1 75.95(13) . . ?
C28 C23 Ta1 125.91(15) . . ?
C23 C24 C20 107.9(2) . . ?
C23 C24 C29 124.8(2) . . ?
C20 C24 C29 126.7(2) . . ?
C23 C24 Ta1 70.09(12) . . ?
C20 C24 Ta1 77.22(13) . . ?
C29 C24 Ta1 124.86(16) . . ?
C20 C25 H25A 109.5 . . ?
C20 C25 H25B 109.5 . . ?
H25A C25 H25B 109.5 . . ?
C20 C25 H25C 109.5 . . ?
H25A C25 H25C 109.5 . . ?
H25B C25 H25C 109.5 . . ?
C20 C25 H25D 109.5 . . ?
H25A C25 H25D 141.1 . . ?
H25B C25 H25D 56.3 . . ?
H25C C25 H25D 56.3 . . ?
C20 C25 H25E 109.5 . . ?
H25A C25 H25E 56.3 . . ?
H25B C25 H25E 141.1 . . ?
H25C C25 H25E 56.3 . . ?
H25D C25 H25E 109.5 . . ?
C20 C25 H25F 109.5 . . ?
H25A C25 H25F 56.3 . . ?
H25B C25 H25F 56.3 . . ?
H25C C25 H25F 141.1 . . ?
H25D C25 H25F 109.5 . . ?
H25E C25 H25F 109.5 . . ?
C21 C26 H26A 109.5 . . ?
C21 C26 H26B 109.5 . . ?
H26A C26 H26B 109.5 . . ?
C21 C26 H26C 109.5 . . ?
H26A C26 H26C 109.5 . . ?
H26B C26 H26C 109.5 . . ?
C22 C27 H27A 109.5 . . ?
C22 C27 H27B 109.5 . . ?
H27A C27 H27B 109.5 . . ?
C22 C27 H27C 109.5 . . ?
H27A C27 H27C 109.5 . . ?
H27B C27 H27C 109.5 . . ?
C23 C28 H28A 109.5 . . ?
C23 C28 H28B 109.5 . . ?
H28A C28 H28B 109.5 . . ?
C23 C28 H28C 109.5 . . ?
H28A C28 H28C 109.5 . . ?
H28B C28 H28C 109.5 . . ?
C24 C29 H29A 109.5 . . ?
C24 C29 H29B 109.5 . . ?
H29A C29 H29B 109.5 . . ?
C24 C29 H29C 109.5 . . ?
H29A C29 H29C 109.5 . . ?
H29B C29 H29C 109.5 . . ?

loop_
 _geom_torsion_atom_site_label_1
 _geom_torsion_atom_site_label_2
 _geom_torsion_atom_site_label_3
 _geom_torsion_atom_site_label_4
 _geom_torsion
 _geom_torsion_site_symmetry_1
 _geom_torsion_site_symmetry_2
 _geom_torsion_site_symmetry_3
 _geom_torsion_site_symmetry_4
 _geom_torsion_publ_flag
N15 C1 C2 C3 -88.0(3) . . . . ?
N11 C1 C2 C3 90.9(3) . . . . ?
N15 C1 C2 C7 94.6(3) . . . . ?
N11 C1 C2 C7 -86.5(3) . . . . ?
C7 C2 C3 C4 1.9(4) . . . . ?
C1 C2 C3 C4 -175.5(2) . . . . ?
C2 C3 C4 C5 -1.4(5) . . . . ?
C3 C4 C5 C6 0.0(5) . . . . ?
C4 C5 C6 C7 0.8(5) . . . . ?
C5 C6 C7 C2 -0.2(4) . . . . ?
C3 C2 C7 C6 -1.2(4) . . . . ?
C1 C2 C7 C6 176.3(2) . . . . ?
N15 C1 N11 C12 176.9(2) . . . . ?
C2 C1 N11 C12 -2.2(4) . . . . ?
N15 C1 N11 Ta1 7.3(2) . . . . ?
C2 C1 N11 Ta1 -171.76(18) . . . . ?
C1 N11 C12 C13 -66.5(3) . . . . ?
Ta1 N11 C12 C13 99.8(2) . . . . ?
C1 N11 C12 C14 61.3(3) . . . . ?
Ta1 N11 C12 C14 -132.5(2) . . . . ?
N11 C1 N15 C16 -173.18(19) . . . . ?
C2 C1 N15 C16 5.9(3) . . . . ?
N11 C1 N15 Ta1 -6.67(18) . . . . ?
C2 C1 N15 Ta1 172.4(2) . . . . ?
C1 N15 C16 C18 -84.3(3) . . . . ?
Ta1 N15 C16 C18 119.7(2) . . . . ?
C1 N15 C16 C17 152.0(2) . . . . ?
Ta1 N15 C16 C17 -4.0(4) . . . . ?
C24 C20 C21 C22 1.2(3) . . . . ?
C25 C20 C21 C22 178.1(2) . . . . ?
Ta1 C20 C21 C22 -61.93(15) . . . . ?
C24 C20 C21 C26 -173.9(2) . . . . ?
C25 C20 C21 C26 3.1(4) . . . . ?
Ta1 C20 C21 C26 123.0(2) . . . . ?
C24 C20 C21 Ta1 63.09(15) . . . . ?
C25 C20 C21 Ta1 -119.9(2) . . . . ?
C20 C21 C22 C23 -0.1(2) . . . . ?
C26 C21 C22 C23 175.2(2) . . . . ?
Ta1 C21 C22 C23 -64.63(15) . . . . ?
C20 C21 C22 C27 -175.0(2) . . . . ?
C26 C21 C22 C27 0.3(4) . . . . ?
Ta1 C21 C22 C27 120.5(2) . . . . ?
C20 C21 C22 Ta1 64.50(16) . . . . ?
C26 C21 C22 Ta1 -120.2(2) . . . . ?
C21 C22 C23 C24 -0.9(2) . . . . ?
C27 C22 C23 C24 173.7(2) . . . . ?
Ta1 C22 C23 C24 -70.76(16) . . . . ?
C21 C22 C23 C28 -165.7(2) . . . . ?
C27 C22 C23 C28 9.0(4) . . . . ?
Ta1 C22 C23 C28 124.5(2) . . . . ?
C21 C22 C23 Ta1 69.81(16) . . . . ?
C27 C22 C23 Ta1 -115.6(2) . . . . ?
C22 C23 C24 C20 1.7(2) . . . . ?
C28 C23 C24 C20 166.8(2) . . . . ?
Ta1 C23 C24 C20 -68.62(16) . . . . ?
C22 C23 C24 C29 -170.5(2) . . . . ?
C28 C23 C24 C29 -5.3(4) . . . . ?
Ta1 C23 C24 C29 119.3(2) . . . . ?
C22 C23 C24 Ta1 70.27(15) . . . . ?
C28 C23 C24 Ta1 -124.5(2) . . . . ?
C21 C20 C24 C23 -1.7(3) . . . . ?
C25 C20 C24 C23 -178.7(2) . . . . ?
Ta1 C20 C24 C23 63.86(15) . . . . ?
C21 C20 C24 C29 170.2(2) . . . . ?
C25 C20 C24 C29 -6.8(4) . . . . ?
Ta1 C20 C24 C29 -124.2(2) . . . . ?
C21 C20 C24 Ta1 -65.61(16) . . . . ?
C25 C20 C24 Ta1 117.4(2) . . . . ?

_refine_diff_density_max    1.095
_refine_diff_density_min   -0.538
_refine_diff_density_rms    0.086

_diffrn_radiation_monochromator       graphite
_symmetry_cell_setting                Monoclinic
_symmetry_space_group_name_H-M        C2/c
_diffrn_orient_matrix_type            standard
_diffrn_orient_matrix_UB_11          -0.0069191
_diffrn_orient_matrix_UB_12           0.0473116
_diffrn_orient_matrix_UB_13           0.0262537
_diffrn_orient_matrix_UB_21          -0.0525521
_diffrn_orient_matrix_UB_22          -0.0239652
_diffrn_orient_matrix_UB_23           0.0230040
_diffrn_orient_matrix_UB_31           0.0558554
_diffrn_orient_matrix_UB_32          -0.0167015
_diffrn_orient_matrix_UB_33           0.0413746
_diffrn_measurement_specimen_support  'MiTeGen loop'
_diffrn_detector                      'CCD area detector'
_iucr_refine_instructions_details     'See _shelx_res_file'

#_______________________________________________________________________________
#
_publ_section_references
;
Bruker (2010). Apex2. Bruker AXS Inc., Madison, Wisconsin, USA.

Sheldrick, G. M. (2008). Acta Cryst. A64, 112-122.

Sheldrick, G. M. (2012). SHELXL-2012. University of G\"ottingen, Germany.
;

data_cmpd_trans_3b

_audit_creation_method            'SHELXL-97 & ZCIF'
_chemical_name_systematic
;
cmpd_trans_3b
;
_chemical_name_common             cmpd_trans_3b
_chemical_formula_moiety          'C46 H68 N6 Ta2'
_chemical_formula_sum             'C46 H68 N6 Ta2'
_chemical_formula_weight          1066.96

loop_
 _atom_type_symbol
 _atom_type_description
 _atom_type_scat_dispersion_real
 _atom_type_scat_dispersion_imag
 _atom_type_scat_source
 'C'  'C'   0.0033   0.0016
 'International Tables Vol C Tables 4.2.6.8 and 6.1.1.4'
 'H'  'H'   0.0000   0.0000
 'International Tables Vol C Tables 4.2.6.8 and 6.1.1.4'
 'N'  'N'   0.0061   0.0033
 'International Tables Vol C Tables 4.2.6.8 and 6.1.1.4'
 'Ta'  'Ta'  -0.7052   6.5227
 'International Tables Vol C Tables 4.2.6.8 and 6.1.1.4'

_symmetry_cell_setting            Orthorhombic
_symmetry_space_group_name_H-M    Pbca

loop_
 _symmetry_equiv_pos_as_xyz
 'x, y, z'
 '-x+1/2, -y, z+1/2'
 '-x, y+1/2, -z+1/2'
 'x+1/2, -y+1/2, -z'
 '-x, -y, -z'
 'x-1/2, y, -z-1/2'
 'x, -y-1/2, z-1/2'
 '-x-1/2, y-1/2, z'

_cell_length_a                    16.4902(11)
_cell_length_b                    15.3364(10)
_cell_length_c                    17.0776(11)
_cell_angle_alpha                 90.00
_cell_angle_beta                  90.00
_cell_angle_gamma                 90.00
_cell_volume                      4318.9(5)
_cell_formula_units_Z             4
_cell_measurement_temperature     150(2)
_cell_measurement_reflns_used     29457
_cell_measurement_theta_min       2.2
_cell_measurement_theta_max       31.0

_exptl_crystal_description        prism
_exptl_crystal_colour             red
_exptl_crystal_size_max           0.17
_exptl_crystal_size_mid           0.166
_exptl_crystal_size_min           0.143
_exptl_crystal_density_meas       ?
_exptl_crystal_density_diffrn     1.641
_exptl_crystal_density_method     'not measured'
_exptl_crystal_F_000              2128
_exptl_absorpt_coefficient_mu     5.102
_exptl_absorpt_correction_type    integration
_exptl_absorpt_correction_T_min   0.383
_exptl_absorpt_correction_T_max   0.482
_exptl_absorpt_process_details    'SADABS (Sheldrick, 1996)'

_diffrn_ambient_temperature       150(2)
_diffrn_radiation_wavelength      0.71073
_diffrn_radiation_type            MoK\a
_diffrn_radiation_source          'fine-focus sealed tube'
_diffrn_radiation_monochromator   graphite
_diffrn_measurement_device_type   'three-circle diffractometer'
_diffrn_measurement_method        '\f and \w scans'
_diffrn_detector_area_resol_mean  11.198
_diffrn_reflns_number             68126
_diffrn_reflns_av_R_equivalents   0.0260
_diffrn_reflns_av_sigmaI/netI     0.0122
_diffrn_reflns_limit_h_min        -23
_diffrn_reflns_limit_h_max        23
_diffrn_reflns_limit_k_min        -21
_diffrn_reflns_limit_k_max        21
_diffrn_reflns_limit_l_min        -24
_diffrn_reflns_limit_l_max        24
_diffrn_reflns_theta_min          2.17
_diffrn_reflns_theta_max          30.00
_reflns_number_total              6299
_reflns_number_gt                 5387
_reflns_threshold_expression      >2sigma(I)

_computing_data_collection        'Apex2 (Bruker, 2005)'
_computing_cell_refinement        Apex2
_computing_data_reduction         Apex2
_computing_structure_solution     'SHELXS-97 (Sheldrick, 2008)'
_computing_structure_refinement   'SHELXL-97 (Sheldrick, 2008)'
_computing_molecular_graphics     'XSHEL (Bruker, 2004)'
_computing_publication_material   SHELXL-97

_refine_special_details
;
 Refinement of F^2^ against ALL reflections.  The weighted R-factor wR and
 goodness of fit S are based on F^2^, conventional R-factors R are based
 on F, with F set to zero for negative F^2^. The threshold expression of
 F^2^ > 2sigma(F^2^) is used only for calculating R-factors(gt) etc. and is
 not relevant to the choice of reflections for refinement.  R-factors based
 on F^2^ are statistically about twice as large as those based on F, and R-
 factors based on ALL data will be even larger.
;

_refine_ls_structure_factor_coef  Fsqd
_refine_ls_matrix_type            full
_refine_ls_weighting_scheme       calc
_refine_ls_weighting_details
'w=1/[\s^2^(Fo^2^)+(0.003P)^2^+6.5P], P=(max(Fo^2^,0)+2Fc^2^)/3'
_atom_sites_solution_primary      direct
_atom_sites_solution_secondary    difmap
_atom_sites_solution_hydrogens    geom
_refine_ls_hydrogen_treatment     refU
_refine_ls_extinction_method      none
_refine_ls_extinction_coef        ?
_refine_ls_number_reflns          6299
_refine_ls_number_parameters      269
_refine_ls_number_restraints      0
_refine_ls_R_factor_all           0.0211
_refine_ls_R_factor_gt            0.0152
_refine_ls_wR_factor_ref          0.0311
_refine_ls_wR_factor_gt           0.0297
_refine_ls_goodness_of_fit_ref    1.000
_refine_ls_restrained_S_all       1.000
_refine_ls_shift/su_max           0.003
_refine_ls_shift/su_mean          0.000

loop_
 _atom_site_label
 _atom_site_type_symbol
 _atom_site_fract_x
 _atom_site_fract_y
 _atom_site_fract_z
 _atom_site_U_iso_or_equiv
 _atom_site_adp_type
 _atom_site_occupancy
 _atom_site_symmetry_multiplicity
 _atom_site_calc_flag
 _atom_site_refinement_flags
 _atom_site_disorder_assembly
 _atom_site_disorder_group
Ta1 Ta 0.039891(4) 0.434118(4) 0.041222(4) 0.01667(2) Uani 1 1 d . . .
N1 N -0.06912(10) 0.45992(11) 0.01144(11) 0.0322(4) Uani 1 1 d . . .
C10 C 0.07444(12) 0.34268(13) -0.06774(11) 0.0251(4) Uani 1 1 d . . .
C11 C 0.15178(12) 0.35951(12) -0.03328(11) 0.0251(4) Uani 1 1 d . . .
C12 C 0.15402(11) 0.31662(12) 0.03973(11) 0.0238(4) Uani 1 1 d . . .
C13 C 0.07911(12) 0.27136(11) 0.05018(11) 0.0230(4) Uani 1 1 d . . .
C14 C 0.03049(12) 0.28604(12) -0.01669(11) 0.0240(4) Uani 1 1 d . . .
C15 C 0.05151(14) 0.36478(14) -0.15075(11) 0.0307(4) Uani 1 1 d . . .
H15A H 0.0674 0.3169 -0.1855 0.077(6) Uiso 1 1 calc R . .
H15B H 0.0794 0.4183 -0.1668 0.077(6) Uiso 1 1 calc R . .
H15C H -0.0073 0.3736 -0.1540 0.077(6) Uiso 1 1 calc R . .
C16 C 0.21874(13) 0.40903(15) -0.07290(13) 0.0350(5) Uani 1 1 d . . .
H16A H 0.2035 0.4706 -0.0772 0.050(4) Uiso 1 1 calc R . .
H16B H 0.2278 0.3850 -0.1253 0.050(4) Uiso 1 1 calc R . .
H16C H 0.2686 0.4038 -0.0420 0.050(4) Uiso 1 1 calc R . .
C17 C 0.22483(12) 0.30701(14) 0.09411(13) 0.0321(4) Uani 1 1 d . . .
H17A H 0.2725 0.3354 0.0712 0.045(4) Uiso 1 1 calc R . .
H17B H 0.2363 0.2450 0.1023 0.045(4) Uiso 1 1 calc R . .
H17C H 0.2120 0.3344 0.1444 0.045(4) Uiso 1 1 calc R . .
C18 C 0.06305(13) 0.21012(13) 0.11700(12) 0.0308(4) Uani 1 1 d . . .
H18A H 0.0594 0.2433 0.1659 0.054(5) Uiso 1 1 calc R . .
H18B H 0.1074 0.1678 0.1208 0.054(5) Uiso 1 1 calc R . .
H18C H 0.0119 0.1792 0.1079 0.054(5) Uiso 1 1 calc R . .
C19 C -0.04936(12) 0.24419(13) -0.03701(13) 0.0316(4) Uani 1 1 d . . .
H19A H -0.0913 0.2892 -0.0410 0.045(4) Uiso 1 1 calc R . .
H19B H -0.0642 0.2024 0.0040 0.045(4) Uiso 1 1 calc R . .
H19C H -0.0445 0.2137 -0.0872 0.045(4) Uiso 1 1 calc R . .
N21 N 0.10770(10) 0.47817(10) 0.14783(9) 0.0233(3) Uani 1 1 d . . .
N22 N -0.00493(10) 0.40342(11) 0.16383(9) 0.0236(3) Uani 1 1 d . . .
C20 C 0.05890(11) 0.43871(12) 0.19861(10) 0.0211(3) Uani 1 1 d . . .
C21 C 0.07686(11) 0.43342(13) 0.28452(11) 0.0243(4) Uani 1 1 d . . .
C22 C 0.04890(15) 0.49651(14) 0.33643(12) 0.0348(5) Uani 1 1 d . . .
H22 H 0.0160 0.5430 0.3179 0.042(7) Uiso 1 1 calc R . .
C23 C 0.06894(17) 0.49170(17) 0.41522(13) 0.0434(6) Uani 1 1 d . . .
H23 H 0.0497 0.5349 0.4505 0.060(9) Uiso 1 1 calc R . .
C24 C 0.11637(16) 0.42481(17) 0.44238(13) 0.0444(6) Uani 1 1 d . . .
H24 H 0.1298 0.4219 0.4964 0.064(9) Uiso 1 1 calc R . .
C25 C 0.14462(14) 0.36203(16) 0.39197(14) 0.0392(5) Uani 1 1 d . . .
H25 H 0.1775 0.3159 0.4111 0.051(8) Uiso 1 1 calc R . .
C26 C 0.12500(13) 0.36595(14) 0.31270(12) 0.0301(4) Uani 1 1 d . . .
H26 H 0.1445 0.3225 0.2779 0.028(6) Uiso 1 1 calc R . .
C27 C 0.18170(12) 0.52451(13) 0.17222(11) 0.0249(4) Uani 1 1 d . . .
H27 H 0.2099 0.4885 0.2127 0.029(6) Uiso 1 1 calc R . .
C28 C 0.23835(13) 0.53555(15) 0.10293(13) 0.0336(5) Uani 1 1 d . . .
H28A H 0.2528 0.4781 0.0821 0.043(4) Uiso 1 1 calc R . .
H28B H 0.2876 0.5660 0.1198 0.043(4) Uiso 1 1 calc R . .
H28C H 0.2112 0.5697 0.0621 0.043(4) Uiso 1 1 calc R . .
C29 C 0.16483(14) 0.61424(14) 0.20704(13) 0.0344(5) Uani 1 1 d . . .
H29A H 0.1385 0.6511 0.1676 0.045(4) Uiso 1 1 calc R . .
H29B H 0.2160 0.6412 0.2232 0.045(4) Uiso 1 1 calc R . .
H29C H 0.1291 0.6082 0.2526 0.045(4) Uiso 1 1 calc R . .
C30 C -0.07147(12) 0.36105(13) 0.20667(12) 0.0280(4) Uani 1 1 d . . .
H30 H -0.0478 0.3203 0.2463 0.035(6) Uiso 1 1 calc R . .
C31 C -0.12398(14) 0.30897(16) 0.15058(14) 0.0409(5) Uani 1 1 d . . .
H31A H -0.1456 0.3478 0.1101 0.057(5) Uiso 1 1 calc R . .
H31B H -0.1690 0.2823 0.1795 0.057(5) Uiso 1 1 calc R . .
H31C H -0.0913 0.2632 0.1260 0.057(5) Uiso 1 1 calc R . .
C32 C -0.12570(16) 0.42578(18) 0.24846(17) 0.0511(7) Uani 1 1 d . . .
H32A H -0.0932 0.4606 0.2849 0.069(6) Uiso 1 1 calc R . .
H32B H -0.1677 0.3943 0.2775 0.069(6) Uiso 1 1 calc R . .
H32C H -0.1513 0.4644 0.2099 0.069(6) Uiso 1 1 calc R . .

loop_
 _atom_site_aniso_label
 _atom_site_aniso_U_11
 _atom_site_aniso_U_22
 _atom_site_aniso_U_33
 _atom_site_aniso_U_23
 _atom_site_aniso_U_13
 _atom_site_aniso_U_12
Ta1 0.01705(3) 0.01593(3) 0.01703(3) 0.00182(3) -0.00019(3) 0.00166(3)
N1 0.0195(8) 0.0310(9) 0.0460(10) 0.0210(8) -0.0065(7) -0.0040(7)
C10 0.0285(10) 0.0262(9) 0.0206(8) -0.0026(7) -0.0001(7) 0.0015(8)
C11 0.0240(9) 0.0269(9) 0.0245(9) -0.0036(7) 0.0029(7) 0.0018(7)
C12 0.0236(9) 0.0231(8) 0.0247(8) -0.0040(7) -0.0032(8) 0.0062(7)
C13 0.0276(9) 0.0182(8) 0.0233(9) -0.0005(7) -0.0018(7) 0.0050(7)
C14 0.0274(10) 0.0214(8) 0.0234(8) -0.0026(7) -0.0021(7) 0.0004(7)
C15 0.0390(12) 0.0311(10) 0.0220(9) 0.0002(8) -0.0014(8) 0.0036(9)
C16 0.0282(11) 0.0444(12) 0.0325(11) -0.0025(9) 0.0077(9) -0.0032(9)
C17 0.0281(10) 0.0310(10) 0.0373(11) -0.0003(9) -0.0076(9) 0.0086(8)
C18 0.0378(11) 0.0235(9) 0.0312(10) 0.0055(8) -0.0007(9) 0.0048(8)
C19 0.0341(11) 0.0284(9) 0.0321(10) 0.0003(8) -0.0074(9) -0.0071(8)
N21 0.0244(8) 0.0258(8) 0.0198(7) 0.0005(6) -0.0003(6) -0.0041(6)
N22 0.0210(8) 0.0283(8) 0.0217(7) 0.0010(6) 0.0026(6) -0.0017(6)
C20 0.0236(9) 0.0202(8) 0.0195(8) -0.0001(7) 0.0014(6) 0.0038(7)
C21 0.0259(9) 0.0257(8) 0.0211(8) 0.0033(7) 0.0001(7) -0.0023(8)
C22 0.0474(14) 0.0322(11) 0.0249(10) 0.0003(8) 0.0035(9) 0.0005(10)
C23 0.0616(16) 0.0444(13) 0.0243(11) -0.0037(10) 0.0056(11) -0.0142(12)
C24 0.0527(15) 0.0553(15) 0.0253(10) 0.0108(10) -0.0083(10) -0.0268(13)
C25 0.0347(12) 0.0458(13) 0.0371(12) 0.0187(10) -0.0108(10) -0.0105(10)
C26 0.0277(10) 0.0312(10) 0.0315(10) 0.0076(8) -0.0016(8) -0.0010(8)
C27 0.0246(9) 0.0261(9) 0.0241(9) 0.0022(7) -0.0027(7) -0.0036(7)
C28 0.0295(11) 0.0352(11) 0.0360(11) -0.0043(9) 0.0043(9) -0.0089(9)
C29 0.0393(12) 0.0318(11) 0.0320(11) -0.0052(9) 0.0003(9) -0.0092(9)
C30 0.0235(9) 0.0325(10) 0.0279(10) 0.0087(8) 0.0040(8) -0.0005(8)
C31 0.0276(11) 0.0492(14) 0.0458(13) 0.0029(11) 0.0054(10) -0.0127(10)
C32 0.0365(13) 0.0547(15) 0.0620(16) -0.0067(14) 0.0250(12) -0.0039(12)

_geom_special_details
;
 All esds (except the esd in the dihedral angle between two l.s. planes)
 are estimated using the full covariance matrix.  The cell esds are taken
 into account individually in the estimation of esds in distances, angles
 and torsion angles; correlations between esds in cell parameters are only
 used when they are defined by crystal symmetry.  An approximate (isotropic)
 treatment of cell esds is used for estimating esds involving l.s. planes.
;

loop_
 _geom_bond_atom_site_label_1
 _geom_bond_atom_site_label_2
 _geom_bond_distance
 _geom_bond_site_symmetry_2
 _geom_bond_publ_flag
Ta1 N1 1.9096(17) . ?
Ta1 N1 1.9188(16) 5_565 ?
Ta1 N21 2.2408(15) . ?
Ta1 N22 2.2699(15) . ?
Ta1 C10 2.3988(19) . ?
Ta1 C14 2.4819(18) . ?
Ta1 C11 2.5164(19) . ?
Ta1 C13 2.5830(17) . ?
Ta1 C12 2.6057(17) . ?
Ta1 Ta1 2.79226(17) 5_565 ?
N1 Ta1 1.9188(16) 5_565 ?
C10 C14 1.428(3) . ?
C10 C11 1.428(3) . ?
C10 C15 1.506(3) . ?
C11 C12 1.410(3) . ?
C11 C16 1.501(3) . ?
C12 C13 1.428(3) . ?
C12 C17 1.499(3) . ?
C13 C14 1.413(3) . ?
C13 C18 1.502(3) . ?
C14 C19 1.505(3) . ?
C15 H15A 0.9800 . ?
C15 H15B 0.9800 . ?
C15 H15C 0.9800 . ?
C16 H16A 0.9800 . ?
C16 H16B 0.9800 . ?
C16 H16C 0.9800 . ?
C17 H17A 0.9800 . ?
C17 H17B 0.9800 . ?
C17 H17C 0.9800 . ?
C18 H18A 0.9800 . ?
C18 H18B 0.9800 . ?
C18 H18C 0.9800 . ?
C19 H19A 0.9800 . ?
C19 H19B 0.9800 . ?
C19 H19C 0.9800 . ?
N21 C20 1.329(2) . ?
N21 C27 1.472(2) . ?
N22 C20 1.324(2) . ?
N22 C30 1.470(2) . ?
C20 C21 1.499(2) . ?
C21 C26 1.390(3) . ?
C21 C22 1.391(3) . ?
C22 C23 1.387(3) . ?
C22 H22 0.9500 . ?
C23 C24 1.371(4) . ?
C23 H23 0.9500 . ?
C24 C25 1.373(4) . ?
C24 H24 0.9500 . ?
C25 C26 1.393(3) . ?
C25 H25 0.9500 . ?
C26 H26 0.9500 . ?
C27 C28 1.517(3) . ?
C27 C29 1.525(3) . ?
C27 H27 1.0000 . ?
C28 H28A 0.9800 . ?
C28 H28B 0.9800 . ?
C28 H28C 0.9800 . ?
C29 H29A 0.9800 . ?
C29 H29B 0.9800 . ?
C29 H29C 0.9800 . ?
C30 C32 1.515(3) . ?
C30 C31 1.518(3) . ?
C30 H30 1.0000 . ?
C31 H31A 0.9800 . ?
C31 H31B 0.9800 . ?
C31 H31C 0.9800 . ?
C32 H32A 0.9800 . ?
C32 H32B 0.9800 . ?
C32 H32C 0.9800 . ?

loop_
 _geom_angle_atom_site_label_1
 _geom_angle_atom_site_label_2
 _geom_angle_atom_site_label_3
 _geom_angle
 _geom_angle_site_symmetry_1
 _geom_angle_site_symmetry_3
 _geom_angle_publ_flag
N1 Ta1 N1 86.33(7) . 5_565 ?
N1 Ta1 N21 128.58(8) . . ?
N1 Ta1 N21 90.01(7) 5_565 . ?
N1 Ta1 N22 88.98(7) . . ?
N1 Ta1 N22 133.61(7) 5_565 . ?
N21 Ta1 N22 58.37(6) . . ?
N1 Ta1 C10 97.94(8) . . ?
N1 Ta1 C10 94.12(8) 5_565 . ?
N21 Ta1 C10 133.48(6) . . ?
N22 Ta1 C10 132.20(6) . . ?
N1 Ta1 C14 91.41(7) . . ?
N1 Ta1 C14 127.15(8) 5_565 . ?
N21 Ta1 C14 129.11(6) . . ?
N22 Ta1 C14 99.06(6) . . ?
C10 Ta1 C14 33.98(6) . . ?
N1 Ta1 C11 130.52(8) . . ?
N1 Ta1 C11 87.93(7) 5_565 . ?
N21 Ta1 C11 100.49(6) . . ?
N22 Ta1 C11 127.65(6) . . ?
C10 Ta1 C11 33.68(6) . . ?
C14 Ta1 C11 55.13(6) . . ?
N1 Ta1 C13 116.86(7) . . ?
N1 Ta1 C13 141.56(7) 5_565 . ?
N21 Ta1 C13 96.79(6) . . ?
N22 Ta1 C13 80.01(6) . . ?
C10 Ta1 C13 54.66(6) . . ?
C14 Ta1 C13 32.33(6) . . ?
C11 Ta1 C13 53.63(6) . . ?
N1 Ta1 C12 145.14(7) . . ?
N1 Ta1 C12 113.56(7) 5_565 . ?
N21 Ta1 C12 81.73(6) . . ?
N22 Ta1 C12 95.78(6) . . ?
C10 Ta1 C12 54.31(6) . . ?
C14 Ta1 C12 53.73(6) . . ?
C11 Ta1 C12 31.90(6) . . ?
C13 Ta1 C12 31.95(6) . . ?
N1 Ta1 Ta1 43.30(5) . 5_565 ?
N1 Ta1 Ta1 43.04(5) 5_565 5_565 ?
N21 Ta1 Ta1 115.25(4) . 5_565 ?
N22 Ta1 Ta1 117.50(4) . 5_565 ?
C10 Ta1 Ta1 98.27(5) . 5_565 ?
C14 Ta1 Ta1 115.58(4) . 5_565 ?
C11 Ta1 Ta1 114.81(5) . 5_565 ?
C13 Ta1 Ta1 147.91(4) . 5_565 ?
C12 Ta1 Ta1 146.71(4) . 5_565 ?
Ta1 N1 Ta1 93.67(7) . 5_565 ?
C14 C10 C11 108.16(17) . . ?
C14 C10 C15 125.74(18) . . ?
C11 C10 C15 124.85(18) . . ?
C14 C10 Ta1 76.20(11) . . ?
C11 C10 Ta1 77.69(11) . . ?
C15 C10 Ta1 122.62(13) . . ?
C12 C11 C10 107.65(17) . . ?
C12 C11 C16 127.97(18) . . ?
C10 C11 C16 124.23(18) . . ?
C12 C11 Ta1 77.54(11) . . ?
C10 C11 Ta1 68.64(10) . . ?
C16 C11 Ta1 122.49(14) . . ?
C11 C12 C13 108.34(16) . . ?
C11 C12 C17 127.87(18) . . ?
C13 C12 C17 123.26(18) . . ?
C11 C12 Ta1 70.56(10) . . ?
C13 C12 Ta1 73.15(10) . . ?
C17 C12 Ta1 128.64(13) . . ?
C14 C13 C12 108.19(16) . . ?
C14 C13 C18 127.85(18) . . ?
C12 C13 C18 123.48(17) . . ?
C14 C13 Ta1 69.89(10) . . ?
C12 C13 Ta1 74.90(10) . . ?
C18 C13 Ta1 127.25(13) . . ?
C13 C14 C10 107.59(17) . . ?
C13 C14 C19 127.92(18) . . ?
C10 C14 C19 124.23(17) . . ?
C13 C14 Ta1 77.78(10) . . ?
C10 C14 Ta1 69.82(10) . . ?
C19 C14 Ta1 122.45(13) . . ?
C10 C15 H15A 109.5 . . ?
C10 C15 H15B 109.5 . . ?
H15A C15 H15B 109.5 . . ?
C10 C15 H15C 109.5 . . ?
H15A C15 H15C 109.5 . . ?
H15B C15 H15C 109.5 . . ?
C11 C16 H16A 109.5 . . ?
C11 C16 H16B 109.5 . . ?
H16A C16 H16B 109.5 . . ?
C11 C16 H16C 109.5 . . ?
H16A C16 H16C 109.5 . . ?
H16B C16 H16C 109.5 . . ?
C12 C17 H17A 109.5 . . ?
C12 C17 H17B 109.5 . . ?
H17A C17 H17B 109.5 . . ?
C12 C17 H17C 109.5 . . ?
H17A C17 H17C 109.5 . . ?
H17B C17 H17C 109.5 . . ?
C13 C18 H18A 109.5 . . ?
C13 C18 H18B 109.5 . . ?
H18A C18 H18B 109.5 . . ?
C13 C18 H18C 109.5 . . ?
H18A C18 H18C 109.5 . . ?
H18B C18 H18C 109.5 . . ?
C14 C19 H19A 109.5 . . ?
C14 C19 H19B 109.5 . . ?
H19A C19 H19B 109.5 . . ?
C14 C19 H19C 109.5 . . ?
H19A C19 H19C 109.5 . . ?
H19B C19 H19C 109.5 . . ?
C20 N21 C27 122.49(16) . . ?
C20 N21 Ta1 95.21(11) . . ?
C27 N21 Ta1 142.09(12) . . ?
C20 N22 C30 123.42(16) . . ?
C20 N22 Ta1 94.02(11) . . ?
C30 N22 Ta1 142.53(13) . . ?
N22 C20 N21 112.01(16) . . ?
N22 C20 C21 125.02(16) . . ?
N21 C20 C21 122.94(17) . . ?
C26 C21 C22 119.10(19) . . ?
C26 C21 C20 119.47(18) . . ?
C22 C21 C20 121.38(18) . . ?
C23 C22 C21 120.1(2) . . ?
C23 C22 H22 119.9 . . ?
C21 C22 H22 119.9 . . ?
C24 C23 C22 120.3(2) . . ?
C24 C23 H23 119.9 . . ?
C22 C23 H23 119.9 . . ?
C23 C24 C25 120.4(2) . . ?
C23 C24 H24 119.8 . . ?
C25 C24 H24 119.8 . . ?
C24 C25 C26 120.0(2) . . ?
C24 C25 H25 120.0 . . ?
C26 C25 H25 120.0 . . ?
C21 C26 C25 120.1(2) . . ?
C21 C26 H26 120.0 . . ?
C25 C26 H26 120.0 . . ?
N21 C27 C28 110.09(16) . . ?
N21 C27 C29 113.24(17) . . ?
C28 C27 C29 108.41(17) . . ?
N21 C27 H27 108.3 . . ?
C28 C27 H27 108.3 . . ?
C29 C27 H27 108.3 . . ?
C27 C28 H28A 109.5 . . ?
C27 C28 H28B 109.5 . . ?
H28A C28 H28B 109.5 . . ?
C27 C28 H28C 109.5 . . ?
H28A C28 H28C 109.5 . . ?
H28B C28 H28C 109.5 . . ?
C27 C29 H29A 109.5 . . ?
C27 C29 H29B 109.5 . . ?
H29A C29 H29B 109.5 . . ?
C27 C29 H29C 109.5 . . ?
H29A C29 H29C 109.5 . . ?
H29B C29 H29C 109.5 . . ?
N22 C30 C32 112.66(17) . . ?
N22 C30 C31 110.13(17) . . ?
C32 C30 C31 107.79(19) . . ?
N22 C30 H30 108.7 . . ?
C32 C30 H30 108.7 . . ?
C31 C30 H30 108.7 . . ?
C30 C31 H31A 109.5 . . ?
C30 C31 H31B 109.5 . . ?
H31A C31 H31B 109.5 . . ?
C30 C31 H31C 109.5 . . ?
H31A C31 H31C 109.5 . . ?
H31B C31 H31C 109.5 . . ?
C30 C32 H32A 109.5 . . ?
C30 C32 H32B 109.5 . . ?
H32A C32 H32B 109.5 . . ?
C30 C32 H32C 109.5 . . ?
H32A C32 H32C 109.5 . . ?
H32B C32 H32C 109.5 . . ?

loop_
 _geom_torsion_atom_site_label_1
 _geom_torsion_atom_site_label_2
 _geom_torsion_atom_site_label_3
 _geom_torsion_atom_site_label_4
 _geom_torsion
 _geom_torsion_site_symmetry_1
 _geom_torsion_site_symmetry_2
 _geom_torsion_site_symmetry_3
 _geom_torsion_site_symmetry_4
 _geom_torsion_publ_flag
N1 Ta1 N1 Ta1 0.0 5_565 . . 5_565 ?
N21 Ta1 N1 Ta1 87.08(9) . . . 5_565 ?
N22 Ta1 N1 Ta1 133.82(8) . . . 5_565 ?
C10 Ta1 N1 Ta1 -93.66(8) . . . 5_565 ?
C14 Ta1 N1 Ta1 -127.13(8) . . . 5_565 ?
C11 Ta1 N1 Ta1 -84.13(10) . . . 5_565 ?
C13 Ta1 N1 Ta1 -147.92(6) . . . 5_565 ?
C12 Ta1 N1 Ta1 -127.50(10) . . . 5_565 ?
N1 Ta1 C10 C14 -80.66(12) . . . . ?
N1 Ta1 C10 C14 -167.52(12) 5_565 . . . ?
N21 Ta1 C10 C14 98.55(13) . . . . ?
N22 Ta1 C10 C14 15.20(15) . . . . ?
C11 Ta1 C10 C14 112.46(16) . . . . ?
C13 Ta1 C10 C14 36.75(11) . . . . ?
C12 Ta1 C10 C14 76.27(12) . . . . ?
Ta1 Ta1 C10 C14 -124.41(10) 5_565 . . . ?
N1 Ta1 C10 C11 166.88(11) . . . . ?
N1 Ta1 C10 C11 80.01(12) 5_565 . . . ?
N21 Ta1 C10 C11 -13.91(15) . . . . ?
N22 Ta1 C10 C11 -97.26(13) . . . . ?
C14 Ta1 C10 C11 -112.46(16) . . . . ?
C13 Ta1 C10 C11 -75.71(12) . . . . ?
C12 Ta1 C10 C11 -36.19(11) . . . . ?
Ta1 Ta1 C10 C11 123.13(11) 5_565 . . . ?
N1 Ta1 C10 C15 43.19(17) . . . . ?
N1 Ta1 C10 C15 -43.68(17) 5_565 . . . ?
N21 Ta1 C10 C15 -137.61(15) . . . . ?
N22 Ta1 C10 C15 139.05(15) . . . . ?
C14 Ta1 C10 C15 123.8(2) . . . . ?
C11 Ta1 C10 C15 -123.7(2) . . . . ?
C13 Ta1 C10 C15 160.59(19) . . . . ?
C12 Ta1 C10 C15 -159.89(19) . . . . ?
Ta1 Ta1 C10 C15 -0.57(17) 5_565 . . . ?
C14 C10 C11 C12 -2.4(2) . . . . ?
C15 C10 C11 C12 -170.21(18) . . . . ?
Ta1 C10 C11 C12 68.43(13) . . . . ?
C14 C10 C11 C16 173.61(18) . . . . ?
C15 C10 C11 C16 5.8(3) . . . . ?
Ta1 C10 C11 C16 -115.57(19) . . . . ?
C14 C10 C11 Ta1 -70.82(13) . . . . ?
C15 C10 C11 Ta1 121.36(19) . . . . ?
N1 Ta1 C11 C12 -132.03(11) . . . . ?
N1 Ta1 C11 C12 144.57(12) 5_565 . . . ?
N21 Ta1 C11 C12 54.95(12) . . . . ?
N22 Ta1 C11 C12 -2.99(14) . . . . ?
C10 Ta1 C11 C12 -114.83(16) . . . . ?
C14 Ta1 C11 C12 -75.82(12) . . . . ?
C13 Ta1 C11 C12 -35.80(10) . . . . ?
Ta1 Ta1 C11 C12 179.25(9) 5_565 . . . ?
N1 Ta1 C11 C10 -17.20(15) . . . . ?
N1 Ta1 C11 C10 -100.60(12) 5_565 . . . ?
N21 Ta1 C11 C10 169.78(11) . . . . ?
N22 Ta1 C11 C10 111.84(12) . . . . ?
C14 Ta1 C11 C10 39.01(11) . . . . ?
C13 Ta1 C11 C10 79.03(12) . . . . ?
C12 Ta1 C11 C10 114.83(16) . . . . ?
Ta1 Ta1 C11 C10 -65.92(12) 5_565 . . . ?
N1 Ta1 C11 C16 100.64(17) . . . . ?
N1 Ta1 C11 C16 17.25(17) 5_565 . . . ?
N21 Ta1 C11 C16 -72.37(17) . . . . ?
N22 Ta1 C11 C16 -130.31(15) . . . . ?
C10 Ta1 C11 C16 117.8(2) . . . . ?
C14 Ta1 C11 C16 156.86(19) . . . . ?
C13 Ta1 C11 C16 -163.12(19) . . . . ?
C12 Ta1 C11 C16 -127.3(2) . . . . ?
Ta1 Ta1 C11 C16 51.92(17) 5_565 . . . ?
C10 C11 C12 C13 1.3(2) . . . . ?
C16 C11 C12 C13 -174.46(19) . . . . ?
Ta1 C11 C12 C13 63.84(13) . . . . ?
C10 C11 C12 C17 173.14(18) . . . . ?
C16 C11 C12 C17 -2.7(3) . . . . ?
Ta1 C11 C12 C17 -124.36(19) . . . . ?
C10 C11 C12 Ta1 -62.50(13) . . . . ?
C16 C11 C12 Ta1 121.7(2) . . . . ?
N1 Ta1 C12 C11 81.07(16) . . . . ?
N1 Ta1 C12 C11 -39.20(13) 5_565 . . . ?
N21 Ta1 C12 C11 -125.57(12) . . . . ?
N22 Ta1 C12 C11 177.62(11) . . . . ?
C10 Ta1 C12 C11 38.29(11) . . . . ?
C14 Ta1 C12 C11 80.61(12) . . . . ?
C13 Ta1 C12 C11 117.10(16) . . . . ?
Ta1 Ta1 C12 C11 -1.25(15) 5_565 . . . ?
N1 Ta1 C12 C13 -36.03(18) . . . . ?
N1 Ta1 C12 C13 -156.30(11) 5_565 . . . ?
N21 Ta1 C12 C13 117.33(11) . . . . ?
N22 Ta1 C12 C13 60.52(11) . . . . ?
C10 Ta1 C12 C13 -78.81(12) . . . . ?
C14 Ta1 C12 C13 -36.49(10) . . . . ?
C11 Ta1 C12 C13 -117.10(16) . . . . ?
Ta1 Ta1 C12 C13 -118.35(10) 5_565 . . . ?
N1 Ta1 C12 C17 -155.48(17) . . . . ?
N1 Ta1 C12 C17 84.25(19) 5_565 . . . ?
N21 Ta1 C12 C17 -2.12(17) . . . . ?
N22 Ta1 C12 C17 -58.92(18) . . . . ?
C10 Ta1 C12 C17 161.7(2) . . . . ?
C14 Ta1 C12 C17 -155.9(2) . . . . ?
C11 Ta1 C12 C17 123.5(2) . . . . ?
C13 Ta1 C12 C17 -119.4(2) . . . . ?
Ta1 Ta1 C12 C17 122.20(16) 5_565 . . . ?
C11 C12 C13 C14 0.2(2) . . . . ?
C17 C12 C13 C14 -172.05(17) . . . . ?
Ta1 C12 C13 C14 62.39(12) . . . . ?
C11 C12 C13 C18 172.85(17) . . . . ?
C17 C12 C13 C18 0.6(3) . . . . ?
Ta1 C12 C13 C18 -124.98(18) . . . . ?
C11 C12 C13 Ta1 -62.18(13) . . . . ?
C17 C12 C13 Ta1 125.57(18) . . . . ?
N1 Ta1 C13 C14 41.56(14) . . . . ?
N1 Ta1 C13 C14 -79.96(15) 5_565 . . . ?
N21 Ta1 C13 C14 -178.60(11) . . . . ?
N22 Ta1 C13 C14 125.27(12) . . . . ?
C10 Ta1 C13 C14 -38.69(11) . . . . ?
C11 Ta1 C13 C14 -80.56(12) . . . . ?
C12 Ta1 C13 C14 -116.31(16) . . . . ?
Ta1 Ta1 C13 C14 -1.71(16) 5_565 . . . ?
N1 Ta1 C13 C12 157.86(11) . . . . ?
N1 Ta1 C13 C12 36.35(16) 5_565 . . . ?
N21 Ta1 C13 C12 -62.29(11) . . . . ?
N22 Ta1 C13 C12 -118.42(11) . . . . ?
C10 Ta1 C13 C12 77.61(12) . . . . ?
C14 Ta1 C13 C12 116.31(16) . . . . ?
C11 Ta1 C13 C12 35.75(11) . . . . ?
Ta1 Ta1 C13 C12 114.59(11) 5_565 . . . ?
N1 Ta1 C13 C18 -81.30(18) . . . . ?
N1 Ta1 C13 C18 157.19(16) 5_565 . . . ?
N21 Ta1 C13 C18 58.54(17) . . . . ?
N22 Ta1 C13 C18 2.42(16) . . . . ?
C10 Ta1 C13 C18 -161.6(2) . . . . ?
C14 Ta1 C13 C18 -122.9(2) . . . . ?
C11 Ta1 C13 C18 156.6(2) . . . . ?
C12 Ta1 C13 C18 120.8(2) . . . . ?
Ta1 Ta1 C13 C18 -124.57(15) 5_565 . . . ?
C12 C13 C14 C10 -1.7(2) . . . . ?
C18 C13 C14 C10 -173.90(18) . . . . ?
Ta1 C13 C14 C10 63.96(13) . . . . ?
C12 C13 C14 C19 172.53(18) . . . . ?
C18 C13 C14 C19 0.3(3) . . . . ?
Ta1 C13 C14 C19 -121.8(2) . . . . ?
C12 C13 C14 Ta1 -65.65(13) . . . . ?
C18 C13 C14 Ta1 122.13(19) . . . . ?
C11 C10 C14 C13 2.5(2) . . . . ?
C15 C10 C14 C13 170.21(18) . . . . ?
Ta1 C10 C14 C13 -69.32(13) . . . . ?
C11 C10 C14 C19 -171.96(18) . . . . ?
C15 C10 C14 C19 -4.3(3) . . . . ?
Ta1 C10 C14 C19 116.20(18) . . . . ?
C11 C10 C14 Ta1 71.84(13) . . . . ?
C15 C10 C14 Ta1 -120.5(2) . . . . ?
N1 Ta1 C14 C13 -143.70(12) . . . . ?
N1 Ta1 C14 C13 129.83(12) 5_565 . . . ?
N21 Ta1 C14 C13 1.79(14) . . . . ?
N22 Ta1 C14 C13 -54.51(12) . . . . ?
C10 Ta1 C14 C13 114.15(17) . . . . ?
C11 Ta1 C14 C13 75.49(12) . . . . ?
C12 Ta1 C14 C13 36.04(11) . . . . ?
Ta1 Ta1 C14 C13 178.99(9) 5_565 . . . ?
N1 Ta1 C14 C10 102.16(12) . . . . ?
N1 Ta1 C14 C10 15.68(14) 5_565 . . . ?
N21 Ta1 C14 C10 -112.35(12) . . . . ?
N22 Ta1 C14 C10 -168.65(11) . . . . ?
C11 Ta1 C14 C10 -38.65(11) . . . . ?
C13 Ta1 C14 C10 -114.15(17) . . . . ?
C12 Ta1 C14 C10 -78.11(12) . . . . ?
Ta1 Ta1 C14 C10 64.85(12) 5_565 . . . ?
N1 Ta1 C14 C19 -16.30(16) . . . . ?
N1 Ta1 C14 C19 -102.77(16) 5_565 . . . ?
N21 Ta1 C14 C19 129.19(15) . . . . ?
N22 Ta1 C14 C19 72.89(16) . . . . ?
C10 Ta1 C14 C19 -118.5(2) . . . . ?
C11 Ta1 C14 C19 -157.11(18) . . . . ?
C13 Ta1 C14 C19 127.4(2) . . . . ?
C12 Ta1 C14 C19 163.44(18) . . . . ?
Ta1 Ta1 C14 C19 -53.61(16) 5_565 . . . ?
N1 Ta1 N21 C20 62.59(13) . . . . ?
N1 Ta1 N21 C20 147.91(12) 5_565 . . . ?
N22 Ta1 N21 C20 3.80(10) . . . . ?
C10 Ta1 N21 C20 -116.40(12) . . . . ?
C14 Ta1 N21 C20 -70.98(13) . . . . ?
C11 Ta1 N21 C20 -124.19(11) . . . . ?
C13 Ta1 N21 C20 -70.02(12) . . . . ?
C12 Ta1 N21 C20 -98.27(12) . . . . ?
Ta1 Ta1 N21 C20 111.81(10) 5_565 . . . ?
N1 Ta1 N21 C27 -123.3(2) . . . . ?
N1 Ta1 N21 C27 -38.0(2) 5_565 . . . ?
N22 Ta1 N21 C27 177.9(2) . . . . ?
C10 Ta1 N21 C27 57.7(2) . . . . ?
C14 Ta1 N21 C27 103.1(2) . . . . ?
C11 Ta1 N21 C27 49.9(2) . . . . ?
C13 Ta1 N21 C27 104.1(2) . . . . ?
C12 Ta1 N21 C27 75.9(2) . . . . ?
Ta1 Ta1 N21 C27 -74.1(2) 5_565 . . . ?
N1 Ta1 N22 C20 -141.84(12) . . . . ?
N1 Ta1 N22 C20 -57.89(14) 5_565 . . . ?
N21 Ta1 N22 C20 -3.81(10) . . . . ?
C10 Ta1 N22 C20 118.35(12) . . . . ?
C14 Ta1 N22 C20 126.89(11) . . . . ?
C11 Ta1 N22 C20 74.34(13) . . . . ?
C13 Ta1 N22 C20 100.65(12) . . . . ?
C12 Ta1 N22 C20 72.76(11) . . . . ?
Ta1 Ta1 N22 C20 -107.94(10) 5_565 . . . ?
N1 Ta1 N22 C30 40.2(2) . . . . ?
N1 Ta1 N22 C30 124.2(2) 5_565 . . . ?
N21 Ta1 N22 C30 178.3(2) . . . . ?
C10 Ta1 N22 C30 -59.6(2) . . . . ?
C14 Ta1 N22 C30 -51.0(2) . . . . ?
C11 Ta1 N22 C30 -103.6(2) . . . . ?
C13 Ta1 N22 C30 -77.3(2) . . . . ?
C12 Ta1 N22 C30 -105.2(2) . . . . ?
Ta1 Ta1 N22 C30 74.1(2) 5_565 . . . ?
C30 N22 C20 N21 -175.61(17) . . . . ?
Ta1 N22 C20 N21 5.91(16) . . . . ?
C30 N22 C20 C21 6.2(3) . . . . ?
Ta1 N22 C20 C21 -172.31(16) . . . . ?
C27 N21 C20 N22 178.28(16) . . . . ?
Ta1 N21 C20 N22 -5.99(16) . . . . ?
C27 N21 C20 C21 -3.5(3) . . . . ?
Ta1 N21 C20 C21 172.27(15) . . . . ?
N22 C20 C21 C26 91.8(2) . . . . ?
N21 C20 C21 C26 -86.2(2) . . . . ?
N22 C20 C21 C22 -90.6(3) . . . . ?
N21 C20 C21 C22 91.3(2) . . . . ?
C26 C21 C22 C23 -0.1(3) . . . . ?
C20 C21 C22 C23 -177.6(2) . . . . ?
C21 C22 C23 C24 0.0(4) . . . . ?
C22 C23 C24 C25 0.1(4) . . . . ?
C23 C24 C25 C26 -0.1(4) . . . . ?
C22 C21 C26 C25 0.1(3) . . . . ?
C20 C21 C26 C25 177.66(19) . . . . ?
C24 C25 C26 C21 0.0(3) . . . . ?
C20 N21 C27 C28 160.81(18) . . . . ?
Ta1 N21 C27 C28 -12.3(3) . . . . ?
C20 N21 C27 C29 -77.6(2) . . . . ?
Ta1 N21 C27 C29 109.3(2) . . . . ?
C20 N22 C30 C32 73.2(3) . . . . ?
Ta1 N22 C30 C32 -109.3(2) . . . . ?
C20 N22 C30 C31 -166.39(18) . . . . ?
Ta1 N22 C30 C31 11.1(3) . . . . ?

_diffrn_measured_fraction_theta_max    1.000
_diffrn_reflns_theta_full              30.00
_diffrn_measured_fraction_theta_full   1.000
_refine_diff_density_max    0.685
_refine_diff_density_min   -0.351
_refine_diff_density_rms    0.074
 
_diffrn_orient_matrix_type            standard
_diffrn_orient_matrix_UB_11          -0.0086526
_diffrn_orient_matrix_UB_12          -0.0571669
_diffrn_orient_matrix_UB_13          -0.0179148
_diffrn_orient_matrix_UB_21           0.0321418
_diffrn_orient_matrix_UB_22          -0.0200536
_diffrn_orient_matrix_UB_23           0.0471182
_diffrn_orient_matrix_UB_31          -0.0560675
_diffrn_orient_matrix_UB_32          -0.0026612
_diffrn_orient_matrix_UB_33           0.0297927
_symmetry_space_group_name_Hall       '-P 2ac 2ab'
_exptl_crystal_id                     'Sita/Yonke BY-6-096 150K'

_diffrn_measurement_details           610,610,610,1200

_diffrn_source_voltage                50.00
_diffrn_source_current                30.00

_diffrn_measurement_specimen_support  'MiTeGen loop'
_diffrn_detector                      'CCD area detector'
_diffrn_detector_type                 'Bruker Smart Apex II'
_diffrn_standards_decay_%             0

#_______________________________________________________________________________
#
_publ_section_references
;
Bruker (2005). Apex2. Bruker AXS Inc., Madison, Wisconsin, USA.

Sheldrick, G. M. (1990). Acta Cryst. A46, 467-473.

Sheldrick, G. M. (1996). SADABS. University of G\"ottingen, Germany.

Sheldrick, G. M. (1997). SHELXL-97. University of G\"ottingen, Germany.

Spek, A. L. (1990). Acta Cryst., A46, C-34.
;
data_cmpd_cis_3c

_audit_creation_method            'SHELXL-2012 & ZCIF'
_chemical_name_systematic
;
cmpd_cis_3c
;
_chemical_name_common             cmpd_cis_3c
_chemical_formula_moiety          'C38 H70 N8 Ta2'
_chemical_formula_sum             'C38 H70 N8 Ta2'
_chemical_formula_weight          1000.92

loop_
 _atom_type_symbol
 _atom_type_description
 _atom_type_scat_dispersion_real
 _atom_type_scat_dispersion_imag
 _atom_type_scat_source
 'C'  'C'   0.0033   0.0016
 'International Tables Vol C Tables 4.2.6.8 and 6.1.1.4'
 'H'  'H'   0.0000   0.0000
 'International Tables Vol C Tables 4.2.6.8 and 6.1.1.4'
 'N'  'N'   0.0061   0.0033
 'International Tables Vol C Tables 4.2.6.8 and 6.1.1.4'
 'Ta'  'Ta'  -0.7052   6.5227
 'International Tables Vol C Tables 4.2.6.8 and 6.1.1.4'

_space_group_crystal_system       tetragonal
_space_group_IT_number            92
_space_group_name_H-M_alt         'P 41 21 2'
_space_group_name_Hall            'P 4abw 2nw'

_shelx_space_group_comment
;
The symmetry employed for this shelxl refinement is uniquely defined
by the following loop, which should always be used as a source of
symmetry information in preference to the above space-group names.
They are only intended as comments.
;

loop_
 _space_group_symop_operation_xyz
 'x, y, z'
 '-x, -y, z+1/2'
 '-y+1/2, x+1/2, z+1/4'
 'y+1/2, -x+1/2, z+3/4'
 '-x+1/2, y+1/2, -z+1/4'
 'x+1/2, -y+1/2, -z+3/4'
 'y, x, -z'
 '-y, -x, -z+1/2'

_cell_length_a                    11.3498(6)
_cell_length_b                    11.3498(6)
_cell_length_c                    31.8364(17)
_cell_angle_alpha                 90
_cell_angle_beta                  90
_cell_angle_gamma                 90
_cell_volume                      4101.1(5)
_cell_formula_units_Z             4
_cell_measurement_temperature     150(2)
_cell_measurement_reflns_used     34213
_cell_measurement_theta_min       2.2
_cell_measurement_theta_max       31.8

_exptl_crystal_description        prism
_exptl_crystal_colour             yellow
_exptl_crystal_density_meas       ?
_exptl_crystal_density_method     'not measured'
_exptl_crystal_density_diffrn     1.621
_exptl_crystal_F_000              2000
_exptl_transmission_factor_min    ?
_exptl_transmission_factor_max    ?
_exptl_crystal_size_max           0.34
_exptl_crystal_size_mid           0.29
_exptl_crystal_size_min           0.29
_exptl_absorpt_coefficient_mu     5.368
_shelx_estimated_absorpt_T_min    0.263
_shelx_estimated_absorpt_T_max    0.305
_exptl_absorpt_correction_type    multi-scan
_exptl_absorpt_correction_T_min   0.144
_exptl_absorpt_correction_T_max   0.211
_exptl_absorpt_process_details    'SADABS (Sheldrick, 2008)'

_diffrn_ambient_temperature       150(2)
_diffrn_radiation_wavelength      0.71073
_diffrn_radiation_type            MoK\a
_diffrn_source                    'sealed tube'
_diffrn_measurement_device_type   'Bruker Smart Apex II diffractometer'
_diffrn_measurement_method        '\f and \w scans'
_diffrn_detector_area_resol_mean  8.333
_diffrn_reflns_number             54593
_diffrn_reflns_av_unetI/netI      0.0133
_diffrn_reflns_av_R_equivalents   0.0268
_diffrn_reflns_limit_h_min        -15
_diffrn_reflns_limit_h_max        15
_diffrn_reflns_limit_k_min        -15
_diffrn_reflns_limit_k_max        15
_diffrn_reflns_limit_l_min        -44
_diffrn_reflns_limit_l_max        44
_diffrn_reflns_theta_min          1.905
_diffrn_reflns_theta_max          29.999
_diffrn_reflns_theta_full         26.000
_diffrn_measured_fraction_theta_max   1.000
_diffrn_measured_fraction_theta_full  1.000
_diffrn_reflns_Laue_measured_fraction_max    1.000
_diffrn_reflns_Laue_measured_fraction_full   1.000
_diffrn_reflns_point_group_measured_fraction_max   1.000
_diffrn_reflns_point_group_measured_fraction_full  1.000
_reflns_number_total              5986
_reflns_number_gt                 5882
_reflns_threshold_expression      'I > 2\s(I)'
_reflns_Friedel_coverage          0.710
_reflns_Friedel_fraction_max      1.000
_reflns_Friedel_fraction_full     1.000

_reflns_special_details
;
 Reflections were merged by SHELXL according to the crystal
 class for the calculation of statistics and refinement.

 _reflns_Friedel_fraction is defined as the number of unique
 Friedel pairs measured divided by the number that would be
 possible theoretically, ignoring centric projections and
 systematic absences.
;

_computing_data_collection        'Apex2 (Bruker, 2010)'
_computing_cell_refinement        Apex2
_computing_data_reduction         'Apex2, Saint'
_computing_structure_solution     'ShelXS-97 (Sheldrick, 2008)'
_computing_structure_refinement   'ShelXL-2012 (Sheldrick, 2012)'
_computing_molecular_graphics     'XSHEL (Bruker, 2004)'
_computing_publication_material   'Apex2, SHELXL-2012'

_refine_special_details
;
H atoms were located from difference Fourier map and refined as
riding on the attached atoms with Uiso refined but constrained
to be the same with CH3 group.
;
_refine_ls_structure_factor_coef  Fsqd
_refine_ls_matrix_type            full
_refine_ls_weighting_scheme       calc
_refine_ls_weighting_details
;
 w=1/[\s^2^(Fo^2^)+(0.0100P)^2^+4.7100P]
 where P=(Fo^2^+2Fc^2^)/3
;
_atom_sites_solution_primary      direct
_atom_sites_solution_secondary    difmap
_atom_sites_solution_hydrogens    difmap
_refine_ls_hydrogen_treatment     refU
_refine_ls_extinction_method      SHELXL
_refine_ls_extinction_coef        0.00031(2)
_refine_ls_extinction_expression
 'Fc^*^=kFc[1+0.001xFc^2^\l^3^/sin(2\q)]^-1/4^'
_refine_ls_abs_structure_details
;
 Flack x determined using 2432 quotients [(I+)-(I-)]/[(I+)+(I-)]
 (Parsons and Flack (2004), Acta Cryst. A60, s61).
;
_refine_ls_abs_structure_Flack    -0.013(3)
_chemical_absolute_configuration  ad
_refine_ls_number_reflns          5986   # 3501 w/o Fiedel pairs
_refine_ls_number_parameters      243
_refine_ls_number_restraints      0
_refine_ls_R_factor_all           0.0145
_refine_ls_R_factor_gt            0.0139
_refine_ls_wR_factor_ref          0.0314
_refine_ls_wR_factor_gt           0.0312
_refine_ls_goodness_of_fit_ref    1.000
_refine_ls_restrained_S_all       1.000
_refine_ls_shift/su_max           0.003
_refine_ls_shift/su_mean          0.000

loop_
 _atom_site_label
 _atom_site_type_symbol
 _atom_site_fract_x
 _atom_site_fract_y
 _atom_site_fract_z
 _atom_site_U_iso_or_equiv
 _atom_site_adp_type
 _atom_site_occupancy
 _atom_site_site_symmetry_order
 _atom_site_calc_flag
 _atom_site_refinement_flags_posn
 _atom_site_refinement_flags_adp
 _atom_site_refinement_flags_occupancy
 _atom_site_disorder_assembly
 _atom_site_disorder_group
Ta1 Ta 0.56927(2) 0.47287(2) 0.46311(2) 0.01588(3) Uani 1 1 d . . . . .
N1 N 0.5833(2) 0.4478(2) 0.52155(7) 0.0179(4) Uani 1 1 d . . . . .
C10 C 0.7971(3) 0.5452(3) 0.45156(9) 0.0239(7) Uani 1 1 d . . . . .
N11 N 0.9041(2) 0.6076(3) 0.45058(10) 0.0339(7) Uani 1 1 d . . . . .
C11 C 1.0054(3) 0.5620(5) 0.42877(16) 0.0549(13) Uani 1 1 d . . . . .
H11A H 1.0563 0.5201 0.4487 0.061(9) Uiso 1 1 calc R . . . .
H11B H 1.0494 0.6272 0.4161 0.061(9) Uiso 1 1 calc R . . . .
H11C H 0.9796 0.5075 0.4067 0.061(9) Uiso 1 1 calc R . . . .
C12 C 0.9278(4) 0.7000(4) 0.48047(13) 0.0488(11) Uani 1 1 d . . . . .
H12A H 0.8555 0.7190 0.4959 0.062(9) Uiso 1 1 calc R . . . .
H12B H 0.9558 0.7703 0.4656 0.062(9) Uiso 1 1 calc R . . . .
H12C H 0.9884 0.6736 0.5003 0.062(9) Uiso 1 1 calc R . . . .
N12 N 0.6946(2) 0.6036(2) 0.44457(8) 0.0208(5) Uani 1 1 d . . . . .
C13 C 0.6975(3) 0.7196(3) 0.42356(10) 0.0230(6) Uani 1 1 d . . . . .
H13 H 0.7588 0.7684 0.4379 0.023(9) Uiso 1 1 calc R . . . .
C14 C 0.5799(3) 0.7830(3) 0.42835(10) 0.0256(6) Uani 1 1 d . . . . .
H14A H 0.5187 0.7394 0.4132 0.037(6) Uiso 1 1 calc R . . . .
H14B H 0.5863 0.8627 0.4168 0.037(6) Uiso 1 1 calc R . . . .
H14C H 0.5591 0.7876 0.4582 0.037(6) Uiso 1 1 calc R . . . .
N13 N 0.7840(2) 0.4329(2) 0.45934(8) 0.0225(5) Uani 1 1 d . . . . .
C15 C 0.7326(3) 0.7094(3) 0.37725(10) 0.0293(7) Uani 1 1 d . . . . .
H15A H 0.8087 0.6690 0.3751 0.036(6) Uiso 1 1 calc R . . . .
H15B H 0.7391 0.7883 0.3650 0.036(6) Uiso 1 1 calc R . . . .
H15C H 0.6725 0.6643 0.3621 0.036(6) Uiso 1 1 calc R . . . .
C16 C 0.8797(3) 0.3683(3) 0.48107(11) 0.0293(7) Uani 1 1 d . . . . .
H16 H 0.9373 0.4277 0.4919 0.027(9) Uiso 1 1 calc R . . . .
C17 C 0.8316(3) 0.2995(3) 0.51875(11) 0.0333(8) Uani 1 1 d . . . . .
H17A H 0.7901 0.3535 0.5377 0.040(7) Uiso 1 1 calc R . . . .
H17B H 0.8970 0.2623 0.5338 0.040(7) Uiso 1 1 calc R . . . .
H17C H 0.7769 0.2387 0.5089 0.040(7) Uiso 1 1 calc R . . . .
C18 C 0.9469(4) 0.2833(4) 0.45205(13) 0.0425(10) Uani 1 1 d . . . . .
H18A H 0.8971 0.2149 0.4458 0.051(8) Uiso 1 1 calc R . . . .
H18B H 1.0192 0.2570 0.4660 0.051(8) Uiso 1 1 calc R . . . .
H18C H 0.9670 0.3237 0.4258 0.051(8) Uiso 1 1 calc R . . . .
C20 C 0.5890(3) 0.3721(3) 0.38952(8) 0.0225(6) Uani 1 1 d . . . . .
C21 C 0.4842(3) 0.4385(3) 0.38684(8) 0.0224(5) Uani 1 1 d . . . . .
C22 C 0.4027(3) 0.3950(3) 0.41679(9) 0.0230(6) Uani 1 1 d . . . . .
C23 C 0.4582(3) 0.2993(3) 0.43853(9) 0.0229(6) Uani 1 1 d . . . . .
C24 C 0.5729(3) 0.2850(3) 0.42110(9) 0.0239(6) Uani 1 1 d . . . . .
C25 C 0.6953(3) 0.3834(3) 0.36172(10) 0.0329(8) Uani 1 1 d . . . . .
H25A H 0.6702 0.3857 0.3323 0.042(11) Uiso 0.65(5) 1 calc R . P . .
H25B H 0.7473 0.3156 0.3661 0.042(11) Uiso 0.65(5) 1 calc R . P . .
H25C H 0.7376 0.4561 0.3686 0.042(11) Uiso 0.65(5) 1 calc R . P . .
H25D H 0.7665 0.3859 0.3791 0.042(11) Uiso 0.35(5) 1 calc R . P . .
H25E H 0.6894 0.4560 0.3452 0.042(11) Uiso 0.35(5) 1 calc R . P . .
H25F H 0.6992 0.3155 0.3427 0.042(11) Uiso 0.35(5) 1 calc R . P . .
C26 C 0.4563(3) 0.5329(3) 0.35501(10) 0.0319(7) Uani 1 1 d . . . . .
H26A H 0.5246 0.5449 0.3366 0.055(8) Uiso 1 1 calc R . . . .
H26B H 0.4379 0.6067 0.3696 0.055(8) Uiso 1 1 calc R . . . .
H26C H 0.3884 0.5085 0.3381 0.055(8) Uiso 1 1 calc R . . . .
C27 C 0.2802(3) 0.4405(3) 0.42231(11) 0.0295(7) Uani 1 1 d . . . . .
H27A H 0.2821 0.5126 0.4393 0.047(8) Uiso 1 1 calc R . . . .
H27B H 0.2322 0.3809 0.4365 0.047(8) Uiso 1 1 calc R . . . .
H27C H 0.2460 0.4580 0.3947 0.047(8) Uiso 1 1 calc R . . . .
C28 C 0.4023(3) 0.2095(3) 0.46695(11) 0.0332(8) Uani 1 1 d . . . . .
H28A H 0.3950 0.1344 0.4520 0.047(8) Uiso 1 1 calc R . . . .
H28B H 0.3240 0.2370 0.4754 0.047(8) Uiso 1 1 calc R . . . .
H28C H 0.4516 0.1987 0.4919 0.047(8) Uiso 1 1 calc R . . . .
C29 C 0.6509(4) 0.1812(3) 0.42972(12) 0.0353(8) Uani 1 1 d . . . . .
H29A H 0.6603 0.1715 0.4601 0.051(8) Uiso 1 1 calc R . . . .
H29B H 0.7282 0.1942 0.4168 0.051(8) Uiso 1 1 calc R . . . .
H29C H 0.6151 0.1100 0.4179 0.051(8) Uiso 1 1 calc R . . . .

loop_
 _atom_site_aniso_label
 _atom_site_aniso_U_11
 _atom_site_aniso_U_22
 _atom_site_aniso_U_33
 _atom_site_aniso_U_23
 _atom_site_aniso_U_13
 _atom_site_aniso_U_12
Ta1 0.01694(5) 0.01615(5) 0.01454(4) -0.00105(4) 0.00160(4) 0.00090(4)
N1 0.0183(11) 0.0204(12) 0.0151(9) 0.0016(8) 0.0017(8) 0.0029(8)
C10 0.0170(13) 0.0347(19) 0.0200(13) 0.0058(11) 0.0033(10) 0.0014(12)
N11 0.0171(13) 0.0427(17) 0.0419(17) 0.0151(13) 0.0038(11) -0.0017(12)
C11 0.0236(19) 0.075(3) 0.066(3) 0.030(3) 0.0167(18) 0.006(2)
C12 0.032(2) 0.068(3) 0.046(2) 0.018(2) -0.0145(18) -0.020(2)
N12 0.0171(12) 0.0233(13) 0.0218(11) 0.0057(9) 0.0027(9) 0.0006(9)
C13 0.0226(15) 0.0241(15) 0.0221(13) 0.0055(11) -0.0009(11) -0.0025(11)
C14 0.0297(16) 0.0212(14) 0.0260(15) 0.0041(11) -0.0024(13) 0.0020(13)
N13 0.0220(11) 0.0291(12) 0.0164(11) 0.0037(11) 0.0035(9) 0.0066(10)
C15 0.0306(17) 0.0353(18) 0.0221(14) 0.0091(13) 0.0022(12) 0.0002(14)
C16 0.0239(16) 0.0347(18) 0.0293(16) 0.0039(14) -0.0016(13) 0.0105(14)
C17 0.040(2) 0.0316(18) 0.0285(16) 0.0089(14) -0.0004(14) 0.0118(16)
C18 0.034(2) 0.050(2) 0.044(2) 0.0017(17) 0.0062(16) 0.0199(17)
C20 0.0293(17) 0.0241(14) 0.0141(11) -0.0052(10) 0.0036(11) 0.0032(11)
C21 0.0268(14) 0.0204(13) 0.0201(11) -0.0045(10) -0.0030(10) 0.0016(11)
C22 0.0240(15) 0.0231(14) 0.0218(13) -0.0054(11) -0.0026(10) -0.0010(11)
C23 0.0286(17) 0.0199(13) 0.0202(13) -0.0040(10) -0.0011(11) -0.0037(11)
C24 0.0321(16) 0.0197(13) 0.0200(13) -0.0050(10) -0.0001(12) 0.0043(13)
C25 0.039(2) 0.0363(19) 0.0230(14) -0.0039(13) 0.0115(14) 0.0042(15)
C26 0.0402(19) 0.0292(15) 0.0262(14) 0.0014(12) -0.0077(12) 0.0013(14)
C27 0.0222(14) 0.0353(18) 0.0309(16) -0.0102(14) -0.0043(12) 0.0007(13)
C28 0.043(2) 0.0283(16) 0.0287(17) 0.0012(14) -0.0005(15) -0.0116(14)
C29 0.044(2) 0.0246(17) 0.0372(19) -0.0038(14) -0.0021(16) 0.0101(15)

_geom_special_details
;
 All esds (except the esd in the dihedral angle between two l.s. planes)
 are estimated using the full covariance matrix.  The cell esds are taken
 into account individually in the estimation of esds in distances, angles
 and torsion angles; correlations between esds in cell parameters are only
 used when they are defined by crystal symmetry.  An approximate (isotropic)
 treatment of cell esds is used for estimating esds involving l.s. planes.
;

loop_
 _geom_bond_atom_site_label_1
 _geom_bond_atom_site_label_2
 _geom_bond_distance
 _geom_bond_site_symmetry_2
 _geom_bond_publ_flag
Ta1 N1 1.889(2) . ?
Ta1 N1 1.926(2) 7_556 ?
Ta1 N12 2.138(2) . ?
Ta1 C23 2.467(3) . ?
Ta1 N13 2.482(2) . ?
Ta1 C24 2.517(3) . ?
Ta1 C22 2.555(3) . ?
Ta1 C20 2.616(3) . ?
Ta1 C21 2.642(3) . ?
N1 Ta1 1.926(2) 7_556 ?
C10 N13 1.308(4) . ?
C10 N12 1.358(4) . ?
C10 N11 1.406(4) . ?
N11 C11 1.440(5) . ?
N11 C12 1.441(6) . ?
C11 H11A 0.9800 . ?
C11 H11B 0.9800 . ?
C11 H11C 0.9800 . ?
C12 H12A 0.9800 . ?
C12 H12B 0.9800 . ?
C12 H12C 0.9800 . ?
N12 C13 1.477(4) . ?
C13 C14 1.524(5) . ?
C13 C15 1.531(4) . ?
C13 H13 1.0000 . ?
C14 H14A 0.9800 . ?
C14 H14B 0.9800 . ?
C14 H14C 0.9800 . ?
N13 C16 1.482(4) . ?
C15 H15A 0.9800 . ?
C15 H15B 0.9800 . ?
C15 H15C 0.9800 . ?
C16 C17 1.532(5) . ?
C16 C18 1.538(5) . ?
C16 H16 1.0000 . ?
C17 H17A 0.9800 . ?
C17 H17B 0.9800 . ?
C17 H17C 0.9800 . ?
C18 H18A 0.9800 . ?
C18 H18B 0.9800 . ?
C18 H18C 0.9800 . ?
C20 C21 1.411(4) . ?
C20 C24 1.422(4) . ?
C20 C25 1.501(4) . ?
C21 C22 1.417(4) . ?
C21 C26 1.508(4) . ?
C22 C23 1.434(4) . ?
C22 C27 1.494(4) . ?
C23 C24 1.424(5) . ?
C23 C28 1.503(4) . ?
C24 C29 1.500(5) . ?
C25 H25A 0.9800 . ?
C25 H25B 0.9800 . ?
C25 H25C 0.9800 . ?
C25 H25D 0.9800 . ?
C25 H25E 0.9800 . ?
C25 H25F 0.9800 . ?
C26 H26A 0.9800 . ?
C26 H26B 0.9800 . ?
C26 H26C 0.9800 . ?
C27 H27A 0.9800 . ?
C27 H27B 0.9800 . ?
C27 H27C 0.9800 . ?
C28 H28A 0.9800 . ?
C28 H28B 0.9800 . ?
C28 H28C 0.9800 . ?
C29 H29A 0.9800 . ?
C29 H29B 0.9800 . ?
C29 H29C 0.9800 . ?

loop_
 _geom_angle_atom_site_label_1
 _geom_angle_atom_site_label_2
 _geom_angle_atom_site_label_3
 _geom_angle
 _geom_angle_site_symmetry_1
 _geom_angle_site_symmetry_3
 _geom_angle_publ_flag
N1 Ta1 N1 84.75(10) . 7_556 ?
N1 Ta1 N12 108.69(10) . . ?
N1 Ta1 N12 95.42(11) 7_556 . ?
N1 Ta1 C23 103.60(10) . . ?
N1 Ta1 C23 103.55(11) 7_556 . ?
N12 Ta1 C23 143.78(10) . . ?
N1 Ta1 N13 86.41(9) . . ?
N1 Ta1 N13 146.54(10) 7_556 . ?
N12 Ta1 N13 57.37(10) . . ?
C23 Ta1 N13 109.90(10) . . ?
N1 Ta1 C24 113.23(10) . . ?
N1 Ta1 C24 134.22(11) 7_556 . ?
N12 Ta1 C24 115.49(11) . . ?
C23 Ta1 C24 33.19(11) . . ?
N13 Ta1 C24 78.66(11) . . ?
N1 Ta1 C22 125.35(10) . . ?
N1 Ta1 C22 80.90(10) 7_556 . ?
N12 Ta1 C22 124.94(10) . . ?
C23 Ta1 C22 33.12(10) . . ?
N13 Ta1 C22 129.43(9) . . ?
C24 Ta1 C22 54.00(11) . . ?
N1 Ta1 C20 143.98(10) . . ?
N1 Ta1 C20 124.94(9) 7_556 . ?
N12 Ta1 C20 89.95(10) . . ?
C23 Ta1 C20 53.89(10) . . ?
N13 Ta1 C20 78.03(9) . . ?
C24 Ta1 C20 32.08(10) . . ?
C22 Ta1 C20 52.81(10) . . ?
N1 Ta1 C21 156.03(10) . . ?
N1 Ta1 C21 93.87(9) 7_556 . ?
N12 Ta1 C21 95.27(9) . . ?
C23 Ta1 C21 53.40(9) . . ?
N13 Ta1 C21 106.70(9) . . ?
C24 Ta1 C21 52.59(10) . . ?
C22 Ta1 C21 31.59(9) . . ?
C20 Ta1 C21 31.13(9) . . ?
Ta1 N1 Ta1 95.00(10) . 7_556 ?
N13 C10 N12 114.2(3) . . ?
N13 C10 N11 126.4(3) . . ?
N12 C10 N11 119.4(3) . . ?
C10 N11 C11 121.3(4) . . ?
C10 N11 C12 120.9(3) . . ?
C11 N11 C12 115.5(4) . . ?
N11 C11 H11A 109.5 . . ?
N11 C11 H11B 109.5 . . ?
H11A C11 H11B 109.5 . . ?
N11 C11 H11C 109.5 . . ?
H11A C11 H11C 109.5 . . ?
H11B C11 H11C 109.5 . . ?
N11 C12 H12A 109.5 . . ?
N11 C12 H12B 109.5 . . ?
H12A C12 H12B 109.5 . . ?
N11 C12 H12C 109.5 . . ?
H12A C12 H12C 109.5 . . ?
H12B C12 H12C 109.5 . . ?
C10 N12 C13 119.3(2) . . ?
C10 N12 Ta1 100.73(19) . . ?
C13 N12 Ta1 139.3(2) . . ?
N12 C13 C14 110.8(2) . . ?
N12 C13 C15 112.0(3) . . ?
C14 C13 C15 111.1(3) . . ?
N12 C13 H13 107.6 . . ?
C14 C13 H13 107.6 . . ?
C15 C13 H13 107.6 . . ?
C13 C14 H14A 109.5 . . ?
C13 C14 H14B 109.5 . . ?
H14A C14 H14B 109.5 . . ?
C13 C14 H14C 109.5 . . ?
H14A C14 H14C 109.5 . . ?
H14B C14 H14C 109.5 . . ?
C10 N13 C16 119.1(3) . . ?
C10 N13 Ta1 86.71(18) . . ?
C16 N13 Ta1 142.0(2) . . ?
C13 C15 H15A 109.5 . . ?
C13 C15 H15B 109.5 . . ?
H15A C15 H15B 109.5 . . ?
C13 C15 H15C 109.5 . . ?
H15A C15 H15C 109.5 . . ?
H15B C15 H15C 109.5 . . ?
N13 C16 C17 110.9(3) . . ?
N13 C16 C18 113.1(3) . . ?
C17 C16 C18 109.1(3) . . ?
N13 C16 H16 107.9 . . ?
C17 C16 H16 107.9 . . ?
C18 C16 H16 107.9 . . ?
C16 C17 H17A 109.5 . . ?
C16 C17 H17B 109.5 . . ?
H17A C17 H17B 109.5 . . ?
C16 C17 H17C 109.5 . . ?
H17A C17 H17C 109.5 . . ?
H17B C17 H17C 109.5 . . ?
C16 C18 H18A 109.5 . . ?
C16 C18 H18B 109.5 . . ?
H18A C18 H18B 109.5 . . ?
C16 C18 H18C 109.5 . . ?
H18A C18 H18C 109.5 . . ?
H18B C18 H18C 109.5 . . ?
C21 C20 C24 107.8(3) . . ?
C21 C20 C25 126.6(3) . . ?
C24 C20 C25 125.4(3) . . ?
C21 C20 Ta1 75.43(15) . . ?
C24 C20 Ta1 70.10(15) . . ?
C25 C20 Ta1 124.0(2) . . ?
C20 C21 C22 108.9(3) . . ?
C20 C21 C26 126.6(3) . . ?
C22 C21 C26 124.3(3) . . ?
C20 C21 Ta1 73.44(16) . . ?
C22 C21 Ta1 70.84(16) . . ?
C26 C21 Ta1 126.10(19) . . ?
C21 C22 C23 107.6(3) . . ?
C21 C22 C27 124.5(3) . . ?
C23 C22 C27 127.9(3) . . ?
C21 C22 Ta1 77.57(17) . . ?
C23 C22 Ta1 70.04(16) . . ?
C27 C22 Ta1 120.1(2) . . ?
C24 C23 C22 107.4(3) . . ?
C24 C23 C28 122.9(3) . . ?
C22 C23 C28 128.2(3) . . ?
C24 C23 Ta1 75.34(17) . . ?
C22 C23 Ta1 76.84(17) . . ?
C28 C23 Ta1 124.5(2) . . ?
C20 C24 C23 108.4(3) . . ?
C20 C24 C29 126.8(3) . . ?
C23 C24 C29 123.9(3) . . ?
C20 C24 Ta1 77.82(17) . . ?
C23 C24 Ta1 71.47(16) . . ?
C29 C24 Ta1 125.3(2) . . ?
C20 C25 H25A 109.5 . . ?
C20 C25 H25B 109.5 . . ?
H25A C25 H25B 109.5 . . ?
C20 C25 H25C 109.5 . . ?
H25A C25 H25C 109.5 . . ?
H25B C25 H25C 109.5 . . ?
C20 C25 H25D 109.5 . . ?
H25A C25 H25D 141.1 . . ?
H25B C25 H25D 56.3 . . ?
H25C C25 H25D 56.3 . . ?
C20 C25 H25E 109.5 . . ?
H25A C25 H25E 56.3 . . ?
H25B C25 H25E 141.1 . . ?
H25C C25 H25E 56.3 . . ?
H25D C25 H25E 109.5 . . ?
C20 C25 H25F 109.5 . . ?
H25A C25 H25F 56.3 . . ?
H25B C25 H25F 56.3 . . ?
H25C C25 H25F 141.1 . . ?
H25D C25 H25F 109.5 . . ?
H25E C25 H25F 109.5 . . ?
C21 C26 H26A 109.5 . . ?
C21 C26 H26B 109.5 . . ?
H26A C26 H26B 109.5 . . ?
C21 C26 H26C 109.5 . . ?
H26A C26 H26C 109.5 . . ?
H26B C26 H26C 109.5 . . ?
C22 C27 H27A 109.5 . . ?
C22 C27 H27B 109.5 . . ?
H27A C27 H27B 109.5 . . ?
C22 C27 H27C 109.5 . . ?
H27A C27 H27C 109.5 . . ?
H27B C27 H27C 109.5 . . ?
C23 C28 H28A 109.5 . . ?
C23 C28 H28B 109.5 . . ?
H28A C28 H28B 109.5 . . ?
C23 C28 H28C 109.5 . . ?
H28A C28 H28C 109.5 . . ?
H28B C28 H28C 109.5 . . ?
C24 C29 H29A 109.5 . . ?
C24 C29 H29B 109.5 . . ?
H29A C29 H29B 109.5 . . ?
C24 C29 H29C 109.5 . . ?
H29A C29 H29C 109.5 . . ?
H29B C29 H29C 109.5 . . ?

loop_
 _geom_torsion_atom_site_label_1
 _geom_torsion_atom_site_label_2
 _geom_torsion_atom_site_label_3
 _geom_torsion_atom_site_label_4
 _geom_torsion
 _geom_torsion_site_symmetry_1
 _geom_torsion_site_symmetry_2
 _geom_torsion_site_symmetry_3
 _geom_torsion_site_symmetry_4
 _geom_torsion_publ_flag
N1 Ta1 N1 Ta1 -5.30(15) 7_556 . . 7_556 ?
N12 Ta1 N1 Ta1 88.66(11) . . . 7_556 ?
C23 Ta1 N1 Ta1 -108.00(11) . . . 7_556 ?
N13 Ta1 N1 Ta1 142.38(11) . . . 7_556 ?
C24 Ta1 N1 Ta1 -141.58(11) . . . 7_556 ?
C22 Ta1 N1 Ta1 -80.25(13) . . . 7_556 ?
C20 Ta1 N1 Ta1 -153.71(13) . . . 7_556 ?
C21 Ta1 N1 Ta1 -93.0(2) . . . 7_556 ?
N13 C10 N11 C11 46.1(5) . . . . ?
N12 C10 N11 C11 -135.0(3) . . . . ?
N13 C10 N11 C12 -115.8(4) . . . . ?
N12 C10 N11 C12 63.1(4) . . . . ?
N13 C10 N12 C13 -162.1(3) . . . . ?
N11 C10 N12 C13 18.8(4) . . . . ?
N13 C10 N12 Ta1 10.6(3) . . . . ?
N11 C10 N12 Ta1 -168.4(2) . . . . ?
C10 N12 C13 C14 -166.0(3) . . . . ?
Ta1 N12 C13 C14 25.0(4) . . . . ?
C10 N12 C13 C15 69.3(4) . . . . ?
Ta1 N12 C13 C15 -99.7(3) . . . . ?
N12 C10 N13 C16 -159.6(3) . . . . ?
N11 C10 N13 C16 19.3(5) . . . . ?
N12 C10 N13 Ta1 -9.0(2) . . . . ?
N11 C10 N13 Ta1 170.0(3) . . . . ?
C10 N13 C16 C17 128.9(3) . . . . ?
Ta1 N13 C16 C17 1.6(5) . . . . ?
C10 N13 C16 C18 -108.2(4) . . . . ?
Ta1 N13 C16 C18 124.5(3) . . . . ?
C24 C20 C21 C22 0.7(3) . . . . ?
C25 C20 C21 C22 175.8(3) . . . . ?
Ta1 C20 C21 C22 -62.4(2) . . . . ?
C24 C20 C21 C26 -173.9(3) . . . . ?
C25 C20 C21 C26 1.2(5) . . . . ?
Ta1 C20 C21 C26 123.0(3) . . . . ?
C24 C20 C21 Ta1 63.1(2) . . . . ?
C25 C20 C21 Ta1 -121.8(3) . . . . ?
C20 C21 C22 C23 -0.1(3) . . . . ?
C26 C21 C22 C23 174.7(3) . . . . ?
Ta1 C21 C22 C23 -64.11(19) . . . . ?
C20 C21 C22 C27 -177.9(3) . . . . ?
C26 C21 C22 C27 -3.1(5) . . . . ?
Ta1 C21 C22 C27 118.1(3) . . . . ?
C20 C21 C22 Ta1 64.1(2) . . . . ?
C26 C21 C22 Ta1 -121.2(3) . . . . ?
C21 C22 C23 C24 -0.6(3) . . . . ?
C27 C22 C23 C24 177.1(3) . . . . ?
Ta1 C22 C23 C24 -69.8(2) . . . . ?
C21 C22 C23 C28 -167.0(3) . . . . ?
C27 C22 C23 C28 10.7(5) . . . . ?
Ta1 C22 C23 C28 123.8(3) . . . . ?
C21 C22 C23 Ta1 69.2(2) . . . . ?
C27 C22 C23 Ta1 -113.1(3) . . . . ?
C21 C20 C24 C23 -1.1(3) . . . . ?
C25 C20 C24 C23 -176.2(3) . . . . ?
Ta1 C20 C24 C23 65.5(2) . . . . ?
C21 C20 C24 C29 168.1(3) . . . . ?
C25 C20 C24 C29 -7.0(5) . . . . ?
Ta1 C20 C24 C29 -125.3(4) . . . . ?
C21 C20 C24 Ta1 -66.6(2) . . . . ?
C25 C20 C24 Ta1 118.2(3) . . . . ?
C22 C23 C24 C20 1.0(3) . . . . ?
C28 C23 C24 C20 168.4(3) . . . . ?
Ta1 C23 C24 C20 -69.8(2) . . . . ?
C22 C23 C24 C29 -168.6(3) . . . . ?
C28 C23 C24 C29 -1.2(5) . . . . ?
Ta1 C23 C24 C29 120.6(3) . . . . ?
C22 C23 C24 Ta1 70.8(2) . . . . ?
C28 C23 C24 Ta1 -121.9(3) . . . . ?

_refine_diff_density_max    0.720
_refine_diff_density_min   -0.443
_refine_diff_density_rms    0.062

_diffrn_radiation_monochromator       graphite
_symmetry_cell_setting                Tetragonal
_symmetry_space_group_name_H-M        P41212
_diffrn_orient_matrix_type            standard
_diffrn_orient_matrix_UB_11           0.0579710
_diffrn_orient_matrix_UB_12           0.0608720
_diffrn_orient_matrix_UB_13           0.0094184
_diffrn_orient_matrix_UB_21          -0.0580562
_diffrn_orient_matrix_UB_22           0.0635051
_diffrn_orient_matrix_UB_23          -0.0067351
_diffrn_orient_matrix_UB_31          -0.0321015
_diffrn_orient_matrix_UB_32          -0.0049825
_diffrn_orient_matrix_UB_33           0.0291976
_diffrn_measurement_specimen_support  'MiTeGen loop'
_diffrn_detector                      'CCD area detector'
_iucr_refine_instructions_details     'See _shelx_res_file'

#_______________________________________________________________________________
#
_publ_section_references
;
Bruker (2010). Apex2. Bruker AXS Inc., Madison, Wisconsin, USA.

Sheldrick, G. M. (2008). Acta Cryst. A64, 112-122.

Sheldrick, G. M. (2012). SHELXL-2012. University of G\"ottingen, Germany.
;
data_cmpd_trans_3c

_audit_creation_method            'SHELXL-97 & ZCIF'
_chemical_name_systematic
;
cmpd_trans_3c
;
_chemical_name_common             cmpd_trans_3c
_chemical_formula_moiety          'C38 H70 N8 Ta2'
_chemical_formula_sum             'C38 H70 N8 Ta2'
_chemical_formula_weight          1000.92

loop_
 _atom_type_symbol
 _atom_type_description
 _atom_type_scat_dispersion_real
 _atom_type_scat_dispersion_imag
 _atom_type_scat_source
 'C'  'C'   0.0033   0.0016
 'International Tables Vol C Tables 4.2.6.8 and 6.1.1.4'
 'H'  'H'   0.0000   0.0000
 'International Tables Vol C Tables 4.2.6.8 and 6.1.1.4'
 'N'  'N'   0.0061   0.0033
 'International Tables Vol C Tables 4.2.6.8 and 6.1.1.4'
 'Ta'  'Ta'  -0.7052   6.5227
 'International Tables Vol C Tables 4.2.6.8 and 6.1.1.4'

_symmetry_cell_setting            Monoclinic
_symmetry_space_group_name_H-M    P21/n

loop_
 _symmetry_equiv_pos_as_xyz
 'x, y, z'
 '-x+1/2, y+1/2, -z+1/2'
 '-x, -y, -z'
 'x-1/2, -y-1/2, z-1/2'

_cell_length_a                    11.1501(7)
_cell_length_b                    11.8403(8)
_cell_length_c                    14.9152(10)
_cell_angle_alpha                 90.00
_cell_angle_beta                  90.4380(10)
_cell_angle_gamma                 90.00
_cell_volume                      1969.1(2)
_cell_formula_units_Z             2
_cell_measurement_temperature     100(2)
_cell_measurement_reflns_used     16923
_cell_measurement_theta_min       2.2
_cell_measurement_theta_max       32.4

_exptl_crystal_description        prism
_exptl_crystal_colour             brown
_exptl_crystal_size_max           0.28
_exptl_crystal_size_mid           0.21
_exptl_crystal_size_min           0.18
_exptl_crystal_density_meas       ?
_exptl_crystal_density_diffrn     1.688
_exptl_crystal_density_method     'not measured'
_exptl_crystal_F_000              1000
_exptl_absorpt_coefficient_mu     5.590
_exptl_absorpt_correction_type    multi-scan
_exptl_absorpt_correction_T_min   0.272
_exptl_absorpt_correction_T_max   0.366
_exptl_absorpt_process_details    'SADABS (Sheldrick, 1996)'

_diffrn_ambient_temperature       100(2)
_diffrn_radiation_wavelength      0.71073
_diffrn_radiation_type            MoK\a
_diffrn_radiation_source          'fine-focus sealed tube'
_diffrn_radiation_monochromator   graphite
_diffrn_measurement_device_type   'three-circle diffractometer'
_diffrn_measurement_method        '\w scans'
_diffrn_detector_area_resol_mean  11.198
_diffrn_standards_decay_%         0
_diffrn_reflns_number             22594
_diffrn_reflns_av_R_equivalents   0.0188
_diffrn_reflns_av_sigmaI/netI     0.0158
_diffrn_reflns_limit_h_min        -15
_diffrn_reflns_limit_h_max        15
_diffrn_reflns_limit_k_min        -16
_diffrn_reflns_limit_k_max        16
_diffrn_reflns_limit_l_min        -20
_diffrn_reflns_limit_l_max        20
_diffrn_reflns_theta_min          2.20
_diffrn_reflns_theta_max          30.00
_reflns_number_total              5734
_reflns_number_gt                 5513
_reflns_threshold_expression      >2sigma(I)

_computing_data_collection        'Apex2 (Bruker, 2005)'
_computing_cell_refinement        Apex2
_computing_data_reduction         Apex2
_computing_structure_solution     'SHELXS-97 (Sheldrick, 1990)'
_computing_structure_refinement   'SHELXL-97 (Sheldrick, 1997)'
_computing_molecular_graphics     'XSHEL (Bruker, 2004)'
_computing_publication_material   SHELXL-97

_refine_special_details
;
 Refinement of F^2^ against ALL reflections.  The weighted R-factor wR and
 goodness of fit S are based on F^2^, conventional R-factors R are based
 on F, with F set to zero for negative F^2^. The threshold expression of
 F^2^ > 2sigma(F^2^) is used only for calculating R-factors(gt) etc. and is
 not relevant to the choice of reflections for refinement.  R-factors based
 on F^2^ are statistically about twice as large as those based on F, and R-
 factors based on ALL data will be even larger.
;

_refine_ls_structure_factor_coef  Fsqd
_refine_ls_matrix_type            full
_refine_ls_weighting_scheme       calc
_refine_ls_weighting_details
'w=1/[\s^2^(Fo^2^)+(0.015P)^2^+2.41P], P=(max(Fo^2^,0)+2Fc^2^)/3'
_atom_sites_solution_primary      direct
_atom_sites_solution_secondary    difmap
_atom_sites_solution_hydrogens    geom
_refine_ls_hydrogen_treatment     refU
_refine_ls_extinction_method      none
_refine_ls_extinction_coef        ?
_refine_ls_number_reflns          5734
_refine_ls_number_parameters      241
_refine_ls_number_restraints      0
_refine_ls_R_factor_all           0.0158
_refine_ls_R_factor_gt            0.0148
_refine_ls_wR_factor_ref          0.0350
_refine_ls_wR_factor_gt           0.0346
_refine_ls_goodness_of_fit_ref    1.000
_refine_ls_restrained_S_all       1.000
_refine_ls_shift/su_max           0.002
_refine_ls_shift/su_mean          0.000

loop_
 _atom_site_label
 _atom_site_type_symbol
 _atom_site_fract_x
 _atom_site_fract_y
 _atom_site_fract_z
 _atom_site_U_iso_or_equiv
 _atom_site_adp_type
 _atom_site_occupancy
 _atom_site_symmetry_multiplicity
 _atom_site_calc_flag
 _atom_site_refinement_flags
 _atom_site_disorder_assembly
 _atom_site_disorder_group
Ta1 Ta 0.463683(5) 0.592129(5) 0.053643(4) 0.00762(2) Uani 1 1 d . . .
N1 N 0.43657(13) 0.42927(12) 0.04602(9) 0.0108(2) Uani 1 1 d . . .
N11 N 0.40000(12) 0.76060(12) -0.00427(9) 0.0108(2) Uani 1 1 d . . .
N12 N 0.27047(12) 0.62702(12) 0.03137(10) 0.0109(3) Uani 1 1 d . . .
N13 N 0.19172(13) 0.79786(13) -0.03536(10) 0.0148(3) Uani 1 1 d . . .
C10 C 0.28498(15) 0.73070(14) -0.00384(11) 0.0114(3) Uani 1 1 d . . .
C11 C 0.10019(17) 0.75621(17) -0.09668(13) 0.0202(4) Uani 1 1 d . . .
H11A H 0.1203 0.6792 -0.1153 0.034(4) Uiso 1 1 calc R . .
H11B H 0.0961 0.8053 -0.1495 0.034(4) Uiso 1 1 calc R . .
H11C H 0.0223 0.7561 -0.0666 0.034(4) Uiso 1 1 calc R . .
C12 C 0.18961(18) 0.91826(15) -0.01888(14) 0.0203(4) Uani 1 1 d . . .
H12A H 0.2474 0.9369 0.0287 0.031(4) Uiso 1 1 calc R . .
H12B H 0.1090 0.9409 -0.0003 0.031(4) Uiso 1 1 calc R . .
H12C H 0.2110 0.9586 -0.0739 0.031(4) Uiso 1 1 calc R . .
C13 C 0.44589(15) 0.84825(14) -0.06509(11) 0.0125(3) Uani 1 1 d . . .
H13 H 0.4162 0.9232 -0.0438 0.013(5) Uiso 1 1 calc R . .
C14 C 0.58269(16) 0.84957(15) -0.06154(12) 0.0164(3) Uani 1 1 d . . .
H14A H 0.6096 0.8667 -0.0003 0.021(3) Uiso 1 1 calc R . .
H14B H 0.6129 0.9074 -0.1026 0.021(3) Uiso 1 1 calc R . .
H14C H 0.6135 0.7754 -0.0794 0.021(3) Uiso 1 1 calc R . .
C15 C 0.40578(18) 0.83284(16) -0.16306(12) 0.0178(3) Uani 1 1 d . . .
H15A H 0.4370 0.7611 -0.1860 0.031(4) Uiso 1 1 calc R . .
H15B H 0.4368 0.8953 -0.1993 0.031(4) Uiso 1 1 calc R . .
H15C H 0.3180 0.8323 -0.1664 0.031(4) Uiso 1 1 calc R . .
C16 C 0.15286(15) 0.57662(15) 0.05121(12) 0.0139(3) Uani 1 1 d . . .
H16 H 0.1120 0.5607 -0.0074 0.014(5) Uiso 1 1 calc R . .
C17 C 0.16968(16) 0.46426(16) 0.09944(13) 0.0187(3) Uani 1 1 d . . .
H17A H 0.2207 0.4148 0.0634 0.025(4) Uiso 1 1 calc R . .
H17B H 0.0914 0.4284 0.1080 0.025(4) Uiso 1 1 calc R . .
H17C H 0.2077 0.4774 0.1580 0.025(4) Uiso 1 1 calc R . .
C18 C 0.06862(16) 0.65170(18) 0.10651(13) 0.0208(4) Uani 1 1 d . . .
H18A H 0.1015 0.6609 0.1672 0.032(4) Uiso 1 1 calc R . .
H18B H -0.0106 0.6162 0.1098 0.032(4) Uiso 1 1 calc R . .
H18C H 0.0612 0.7259 0.0778 0.032(4) Uiso 1 1 calc R . .
C20 C 0.60222(15) 0.56328(14) 0.17875(11) 0.0114(3) Uani 1 1 d . . .
C21 C 0.61730(15) 0.67948(14) 0.15476(11) 0.0112(3) Uani 1 1 d . . .
C22 C 0.51100(15) 0.73732(14) 0.17923(11) 0.0120(3) Uani 1 1 d . . .
C23 C 0.43122(15) 0.65819(15) 0.21906(11) 0.0127(3) Uani 1 1 d . . .
C24 C 0.48803(15) 0.55111(14) 0.22034(11) 0.0120(3) Uani 1 1 d . . .
C25 C 0.69882(16) 0.47504(15) 0.17638(12) 0.0160(3) Uani 1 1 d . . .
H25A H 0.7376 0.4699 0.2354 0.034(4) Uiso 1 1 calc R . .
H25B H 0.7586 0.4958 0.1314 0.034(4) Uiso 1 1 calc R . .
H25C H 0.6634 0.4018 0.1607 0.034(4) Uiso 1 1 calc R . .
C26 C 0.73304(16) 0.72991(16) 0.12206(12) 0.0170(3) Uani 1 1 d . . .
H26A H 0.7249 0.8122 0.1183 0.029(4) Uiso 1 1 calc R . .
H26B H 0.7515 0.6995 0.0626 0.029(4) Uiso 1 1 calc R . .
H26C H 0.7980 0.7108 0.1640 0.029(4) Uiso 1 1 calc R . .
C27 C 0.48931(17) 0.86243(15) 0.17583(12) 0.0175(3) Uani 1 1 d . . .
H27A H 0.4941 0.8937 0.2366 0.050(5) Uiso 1 1 calc R . .
H27B H 0.4095 0.8771 0.1505 0.050(5) Uiso 1 1 calc R . .
H27C H 0.5502 0.8982 0.1382 0.050(5) Uiso 1 1 calc R . .
C28 C 0.31503(17) 0.68923(17) 0.26265(13) 0.0204(4) Uani 1 1 d . . .
H28A H 0.2649 0.6217 0.2684 0.031(4) Uiso 1 1 calc R . .
H28B H 0.2731 0.7455 0.2258 0.031(4) Uiso 1 1 calc R . .
H28C H 0.3312 0.7208 0.3223 0.031(4) Uiso 1 1 calc R . .
C29 C 0.44118(17) 0.44401(16) 0.26069(12) 0.0179(3) Uani 1 1 d . . .
H29A H 0.3670 0.4599 0.2931 0.029(4) Uiso 1 1 calc R . .
H29B H 0.5011 0.4130 0.3023 0.029(4) Uiso 1 1 calc R . .
H29C H 0.4249 0.3891 0.2130 0.029(4) Uiso 1 1 calc R . .

loop_
 _atom_site_aniso_label
 _atom_site_aniso_U_11
 _atom_site_aniso_U_22
 _atom_site_aniso_U_33
 _atom_site_aniso_U_23
 _atom_site_aniso_U_13
 _atom_site_aniso_U_12
Ta1 0.00809(3) 0.00747(3) 0.00729(3) -0.00037(2) -0.00009(2) -0.00013(2)
N1 0.0114(6) 0.0106(6) 0.0103(6) 0.0004(5) 0.0010(5) -0.0006(5)
N11 0.0122(6) 0.0089(6) 0.0114(6) 0.0021(5) 0.0004(5) 0.0004(5)
N12 0.0090(6) 0.0102(6) 0.0135(6) 0.0009(5) 0.0001(5) 0.0000(5)
N13 0.0133(7) 0.0127(7) 0.0183(7) 0.0004(5) -0.0044(5) 0.0024(5)
C10 0.0130(7) 0.0120(7) 0.0093(7) -0.0015(6) -0.0005(5) 0.0026(6)
C11 0.0174(8) 0.0224(9) 0.0207(9) 0.0001(7) -0.0076(7) 0.0021(7)
C12 0.0195(9) 0.0146(8) 0.0268(10) -0.0012(7) -0.0010(7) 0.0053(7)
C13 0.0167(8) 0.0086(7) 0.0121(7) 0.0009(6) 0.0015(6) 0.0005(6)
C14 0.0152(8) 0.0150(8) 0.0192(8) 0.0030(6) 0.0037(6) -0.0017(6)
C15 0.0254(9) 0.0147(8) 0.0132(8) 0.0023(6) -0.0001(6) -0.0021(7)
C16 0.0113(7) 0.0165(8) 0.0139(7) 0.0002(6) 0.0013(6) -0.0026(6)
C17 0.0145(8) 0.0190(9) 0.0227(9) 0.0032(7) 0.0035(7) -0.0047(7)
C18 0.0124(8) 0.0272(10) 0.0228(9) -0.0018(7) 0.0048(7) 0.0011(7)
C20 0.0132(7) 0.0120(7) 0.0089(7) -0.0008(5) -0.0018(5) 0.0005(6)
C21 0.0122(7) 0.0118(7) 0.0098(7) -0.0009(5) -0.0018(5) -0.0019(6)
C22 0.0161(7) 0.0107(7) 0.0093(7) -0.0017(5) -0.0023(6) 0.0005(6)
C23 0.0135(7) 0.0149(8) 0.0098(7) -0.0026(6) -0.0003(6) 0.0004(6)
C24 0.0155(7) 0.0123(7) 0.0081(7) -0.0001(6) -0.0006(5) -0.0017(6)
C25 0.0177(8) 0.0150(8) 0.0151(8) -0.0022(6) -0.0024(6) 0.0038(6)
C26 0.0145(8) 0.0190(8) 0.0176(8) 0.0002(7) -0.0010(6) -0.0048(6)
C27 0.0250(9) 0.0112(8) 0.0162(8) -0.0028(6) -0.0009(7) 0.0018(7)
C28 0.0161(8) 0.0263(9) 0.0188(8) -0.0079(7) 0.0034(6) -0.0003(7)
C29 0.0231(9) 0.0160(8) 0.0147(8) 0.0027(6) 0.0017(6) -0.0040(7)

_geom_special_details
;
 All esds (except the esd in the dihedral angle between two l.s. planes)
 are estimated using the full covariance matrix.  The cell esds are taken
 into account individually in the estimation of esds in distances, angles
 and torsion angles; correlations between esds in cell parameters are only
 used when they are defined by crystal symmetry.  An approximate (isotropic)
 treatment of cell esds is used for estimating esds involving l.s. planes.
;

loop_
 _geom_bond_atom_site_label_1
 _geom_bond_atom_site_label_2
 _geom_bond_distance
 _geom_bond_site_symmetry_2
 _geom_bond_publ_flag
Ta1 N1 1.8805(14) 3_665 ?
Ta1 N1 1.9550(14) . ?
Ta1 N12 2.2162(14) . ?
Ta1 N11 2.2847(14) . ?
Ta1 C20 2.4374(16) . ?
Ta1 C21 2.4977(16) . ?
Ta1 C24 2.5458(16) . ?
Ta1 C22 2.5937(16) . ?
Ta1 C23 2.6160(16) . ?
Ta1 Ta1 2.82778(18) 3_665 ?
N1 Ta1 1.8805(14) 3_665 ?
N11 C10 1.330(2) . ?
N11 C13 1.473(2) . ?
N12 C10 1.345(2) . ?
N12 C16 1.473(2) . ?
N13 C10 1.388(2) . ?
N13 C12 1.447(2) . ?
N13 C11 1.452(2) . ?
C11 H11A 0.9800 . ?
C11 H11B 0.9800 . ?
C11 H11C 0.9800 . ?
C12 H12A 0.9800 . ?
C12 H12B 0.9800 . ?
C12 H12C 0.9800 . ?
C13 C14 1.526(2) . ?
C13 C15 1.536(2) . ?
C13 H13 1.0000 . ?
C14 H14A 0.9800 . ?
C14 H14B 0.9800 . ?
C14 H14C 0.9800 . ?
C15 H15A 0.9800 . ?
C15 H15B 0.9800 . ?
C15 H15C 0.9800 . ?
C16 C17 1.523(3) . ?
C16 C18 1.538(3) . ?
C16 H16 1.0000 . ?
C17 H17A 0.9800 . ?
C17 H17B 0.9800 . ?
C17 H17C 0.9800 . ?
C18 H18A 0.9800 . ?
C18 H18B 0.9800 . ?
C18 H18C 0.9800 . ?
C20 C24 1.428(2) . ?
C20 C21 1.432(2) . ?
C20 C25 1.501(2) . ?
C21 C22 1.419(2) . ?
C21 C26 1.506(2) . ?
C22 C23 1.425(2) . ?
C22 C27 1.502(2) . ?
C23 C24 1.417(2) . ?
C23 C28 1.500(2) . ?
C24 C29 1.499(2) . ?
C25 H25A 0.9800 . ?
C25 H25B 0.9800 . ?
C25 H25C 0.9800 . ?
C26 H26A 0.9800 . ?
C26 H26B 0.9800 . ?
C26 H26C 0.9800 . ?
C27 H27A 0.9800 . ?
C27 H27B 0.9800 . ?
C27 H27C 0.9800 . ?
C28 H28A 0.9800 . ?
C28 H28B 0.9800 . ?
C28 H28C 0.9800 . ?
C29 H29A 0.9800 . ?
C29 H29B 0.9800 . ?
C29 H29C 0.9800 . ?

loop_
 _geom_angle_atom_site_label_1
 _geom_angle_atom_site_label_2
 _geom_angle_atom_site_label_3
 _geom_angle
 _geom_angle_site_symmetry_1
 _geom_angle_site_symmetry_3
 _geom_angle_publ_flag
N1 Ta1 N1 85.02(6) 3_665 . ?
N1 Ta1 N12 119.13(6) 3_665 . ?
N1 Ta1 N12 91.46(6) . . ?
N1 Ta1 N11 90.16(6) 3_665 . ?
N1 Ta1 N11 142.34(5) . . ?
N12 Ta1 N11 58.77(5) . . ?
N1 Ta1 C20 102.19(6) 3_665 . ?
N1 Ta1 C20 90.18(6) . . ?
N12 Ta1 C20 138.64(5) . . ?
N11 Ta1 C20 127.24(5) . . ?
N1 Ta1 C21 97.25(6) 3_665 . ?
N1 Ta1 C21 123.27(6) . . ?
N12 Ta1 C21 132.43(5) . . ?
N11 Ta1 C21 94.38(5) . . ?
C20 Ta1 C21 33.70(5) . . ?
N1 Ta1 C24 133.40(6) 3_665 . ?
N1 Ta1 C24 83.33(6) . . ?
N12 Ta1 C24 106.16(5) . . ?
N11 Ta1 C24 124.49(5) . . ?
C20 Ta1 C24 33.21(5) . . ?
C21 Ta1 C24 54.67(5) . . ?
N1 Ta1 C22 122.82(6) 3_665 . ?
N1 Ta1 C22 136.57(6) . . ?
N12 Ta1 C22 100.19(5) . . ?
N11 Ta1 C22 75.83(5) . . ?
C20 Ta1 C22 54.25(5) . . ?
C21 Ta1 C22 32.30(5) . . ?
C24 Ta1 C22 53.24(5) . . ?
N1 Ta1 C23 150.78(6) 3_665 . ?
N1 Ta1 C23 109.11(6) . . ?
N12 Ta1 C23 86.81(5) . . ?
N11 Ta1 C23 92.90(5) . . ?
C20 Ta1 C23 53.94(5) . . ?
C21 Ta1 C23 53.55(5) . . ?
C24 Ta1 C23 31.84(5) . . ?
C22 Ta1 C23 31.74(5) . . ?
N1 Ta1 Ta1 43.53(4) 3_665 3_665 ?
N1 Ta1 Ta1 41.49(4) . 3_665 ?
N12 Ta1 Ta1 109.95(4) . 3_665 ?
N11 Ta1 Ta1 123.31(4) . 3_665 ?
C20 Ta1 Ta1 98.20(4) . 3_665 ?
C21 Ta1 Ta1 117.59(4) . 3_665 ?
C24 Ta1 Ta1 112.13(4) . 3_665 ?
C22 Ta1 Ta1 149.60(4) . 3_665 ?
C23 Ta1 Ta1 143.77(4) . 3_665 ?
Ta1 N1 Ta1 94.98(6) 3_665 . ?
C10 N11 C13 122.00(14) . . ?
C10 N11 Ta1 93.60(10) . . ?
C13 N11 Ta1 137.70(11) . . ?
C10 N12 C16 123.92(14) . . ?
C10 N12 Ta1 96.25(10) . . ?
C16 N12 Ta1 139.49(11) . . ?
C10 N13 C12 121.33(15) . . ?
C10 N13 C11 122.68(15) . . ?
C12 N13 C11 115.44(15) . . ?
N11 C10 N12 111.31(14) . . ?
N11 C10 N13 124.44(15) . . ?
N12 C10 N13 124.25(15) . . ?
N13 C11 H11A 109.5 . . ?
N13 C11 H11B 109.5 . . ?
H11A C11 H11B 109.5 . . ?
N13 C11 H11C 109.5 . . ?
H11A C11 H11C 109.5 . . ?
H11B C11 H11C 109.5 . . ?
N13 C12 H12A 109.5 . . ?
N13 C12 H12B 109.5 . . ?
H12A C12 H12B 109.5 . . ?
N13 C12 H12C 109.5 . . ?
H12A C12 H12C 109.5 . . ?
H12B C12 H12C 109.5 . . ?
N11 C13 C14 109.74(13) . . ?
N11 C13 C15 113.72(14) . . ?
C14 C13 C15 108.55(14) . . ?
N11 C13 H13 108.2 . . ?
C14 C13 H13 108.2 . . ?
C15 C13 H13 108.2 . . ?
C13 C14 H14A 109.5 . . ?
C13 C14 H14B 109.5 . . ?
H14A C14 H14B 109.5 . . ?
C13 C14 H14C 109.5 . . ?
H14A C14 H14C 109.5 . . ?
H14B C14 H14C 109.5 . . ?
C13 C15 H15A 109.5 . . ?
C13 C15 H15B 109.5 . . ?
H15A C15 H15B 109.5 . . ?
C13 C15 H15C 109.5 . . ?
H15A C15 H15C 109.5 . . ?
H15B C15 H15C 109.5 . . ?
N12 C16 C17 110.01(14) . . ?
N12 C16 C18 114.96(15) . . ?
C17 C16 C18 108.96(15) . . ?
N12 C16 H16 107.5 . . ?
C17 C16 H16 107.5 . . ?
C18 C16 H16 107.5 . . ?
C16 C17 H17A 109.5 . . ?
C16 C17 H17B 109.5 . . ?
H17A C17 H17B 109.5 . . ?
C16 C17 H17C 109.5 . . ?
H17A C17 H17C 109.5 . . ?
H17B C17 H17C 109.5 . . ?
C16 C18 H18A 109.5 . . ?
C16 C18 H18B 109.5 . . ?
H18A C18 H18B 109.5 . . ?
C16 C18 H18C 109.5 . . ?
H18A C18 H18C 109.5 . . ?
H18B C18 H18C 109.5 . . ?
C24 C20 C21 108.20(15) . . ?
C24 C20 C25 125.62(15) . . ?
C21 C20 C25 125.26(15) . . ?
C24 C20 Ta1 77.57(9) . . ?
C21 C20 Ta1 75.46(9) . . ?
C25 C20 Ta1 122.01(11) . . ?
C22 C21 C20 107.43(14) . . ?
C22 C21 C26 127.68(15) . . ?
C20 C21 C26 124.35(15) . . ?
C22 C21 Ta1 77.58(9) . . ?
C20 C21 Ta1 70.84(9) . . ?
C26 C21 Ta1 123.63(11) . . ?
C21 C22 C23 108.37(14) . . ?
C21 C22 C27 127.01(16) . . ?
C23 C22 C27 124.18(15) . . ?
C21 C22 Ta1 70.13(9) . . ?
C23 C22 Ta1 74.99(9) . . ?
C27 C22 Ta1 126.70(11) . . ?
C24 C23 C22 108.27(15) . . ?
C24 C23 C28 126.93(16) . . ?
C22 C23 C28 124.32(16) . . ?
C24 C23 Ta1 71.35(9) . . ?
C22 C23 Ta1 73.27(9) . . ?
C28 C23 Ta1 127.47(12) . . ?
C23 C24 C20 107.69(15) . . ?
C23 C24 C29 127.23(16) . . ?
C20 C24 C29 125.05(16) . . ?
C23 C24 Ta1 76.81(9) . . ?
C20 C24 Ta1 69.22(9) . . ?
C29 C24 Ta1 121.23(11) . . ?
C20 C25 H25A 109.5 . . ?
C20 C25 H25B 109.5 . . ?
H25A C25 H25B 109.5 . . ?
C20 C25 H25C 109.5 . . ?
H25A C25 H25C 109.5 . . ?
H25B C25 H25C 109.5 . . ?
C21 C26 H26A 109.5 . . ?
C21 C26 H26B 109.5 . . ?
H26A C26 H26B 109.5 . . ?
C21 C26 H26C 109.5 . . ?
H26A C26 H26C 109.5 . . ?
H26B C26 H26C 109.5 . . ?
C22 C27 H27A 109.5 . . ?
C22 C27 H27B 109.5 . . ?
H27A C27 H27B 109.5 . . ?
C22 C27 H27C 109.5 . . ?
H27A C27 H27C 109.5 . . ?
H27B C27 H27C 109.5 . . ?
C23 C28 H28A 109.5 . . ?
C23 C28 H28B 109.5 . . ?
H28A C28 H28B 109.5 . . ?
C23 C28 H28C 109.5 . . ?
H28A C28 H28C 109.5 . . ?
H28B C28 H28C 109.5 . . ?
C24 C29 H29A 109.5 . . ?
C24 C29 H29B 109.5 . . ?
H29A C29 H29B 109.5 . . ?
C24 C29 H29C 109.5 . . ?
H29A C29 H29C 109.5 . . ?
H29B C29 H29C 109.5 . . ?

loop_
 _geom_torsion_atom_site_label_1
 _geom_torsion_atom_site_label_2
 _geom_torsion_atom_site_label_3
 _geom_torsion_atom_site_label_4
 _geom_torsion
 _geom_torsion_site_symmetry_1
 _geom_torsion_site_symmetry_2
 _geom_torsion_site_symmetry_3
 _geom_torsion_site_symmetry_4
 _geom_torsion_publ_flag
N1 Ta1 N1 Ta1 0.0 3_665 . . 3_665 ?
N12 Ta1 N1 Ta1 119.11(6) . . . 3_665 ?
N11 Ta1 N1 Ta1 83.78(10) . . . 3_665 ?
C20 Ta1 N1 Ta1 -102.22(6) . . . 3_665 ?
C21 Ta1 N1 Ta1 -95.41(7) . . . 3_665 ?
C24 Ta1 N1 Ta1 -134.79(6) . . . 3_665 ?
C22 Ta1 N1 Ta1 -134.38(6) . . . 3_665 ?
C23 Ta1 N1 Ta1 -153.76(5) . . . 3_665 ?
N1 Ta1 N11 C10 123.01(10) 3_665 . . . ?
N1 Ta1 N11 C10 40.97(14) . . . . ?
N12 Ta1 N11 C10 -1.57(9) . . . . ?
C20 Ta1 N11 C10 -131.48(10) . . . . ?
C21 Ta1 N11 C10 -139.71(10) . . . . ?
C24 Ta1 N11 C10 -90.32(11) . . . . ?
C22 Ta1 N11 C10 -113.05(10) . . . . ?
C23 Ta1 N11 C10 -86.06(10) . . . . ?
Ta1 Ta1 N11 C10 92.97(9) 3_665 . . . ?
N1 Ta1 N11 C13 -26.09(16) 3_665 . . . ?
N1 Ta1 N11 C13 -108.13(16) . . . . ?
N12 Ta1 N11 C13 -150.66(17) . . . . ?
C20 Ta1 N11 C13 79.42(17) . . . . ?
C21 Ta1 N11 C13 71.19(16) . . . . ?
C24 Ta1 N11 C13 120.58(15) . . . . ?
C22 Ta1 N11 C13 97.85(16) . . . . ?
C23 Ta1 N11 C13 124.84(16) . . . . ?
Ta1 Ta1 N11 C13 -56.12(17) 3_665 . . . ?
N1 Ta1 N12 C10 -68.93(11) 3_665 . . . ?
N1 Ta1 N12 C10 -154.04(10) . . . . ?
N11 Ta1 N12 C10 1.55(9) . . . . ?
C20 Ta1 N12 C10 114.03(11) . . . . ?
C21 Ta1 N12 C10 65.90(12) . . . . ?
C24 Ta1 N12 C10 122.47(10) . . . . ?
C22 Ta1 N12 C10 67.99(10) . . . . ?
C23 Ta1 N12 C10 96.90(10) . . . . ?
Ta1 Ta1 N12 C10 -116.04(9) 3_665 . . . ?
N1 Ta1 N12 C16 118.07(17) 3_665 . . . ?
N1 Ta1 N12 C16 32.96(17) . . . . ?
N11 Ta1 N12 C16 -171.44(19) . . . . ?
C20 Ta1 N12 C16 -59.0(2) . . . . ?
C21 Ta1 N12 C16 -107.10(17) . . . . ?
C24 Ta1 N12 C16 -50.52(18) . . . . ?
C22 Ta1 N12 C16 -105.00(17) . . . . ?
C23 Ta1 N12 C16 -76.10(17) . . . . ?
Ta1 Ta1 N12 C16 70.96(17) 3_665 . . . ?
C13 N11 C10 N12 158.32(14) . . . . ?
Ta1 N11 C10 N12 2.37(14) . . . . ?
C13 N11 C10 N13 -21.9(2) . . . . ?
Ta1 N11 C10 N13 -177.83(14) . . . . ?
C16 N12 C10 N11 172.07(14) . . . . ?
Ta1 N12 C10 N11 -2.45(14) . . . . ?
C16 N12 C10 N13 -7.7(3) . . . . ?
Ta1 N12 C10 N13 177.74(14) . . . . ?
C12 N13 C10 N11 -40.2(3) . . . . ?
C11 N13 C10 N11 130.96(18) . . . . ?
C12 N13 C10 N12 139.63(18) . . . . ?
C11 N13 C10 N12 -49.3(2) . . . . ?
C10 N11 C13 C14 -170.34(15) . . . . ?
Ta1 N11 C13 C14 -27.5(2) . . . . ?
C10 N11 C13 C15 -48.6(2) . . . . ?
Ta1 N11 C13 C15 94.26(18) . . . . ?
C10 N12 C16 C17 -174.01(15) . . . . ?
Ta1 N12 C16 C17 -2.4(2) . . . . ?
C10 N12 C16 C18 -50.6(2) . . . . ?
Ta1 N12 C16 C18 121.03(17) . . . . ?
N1 Ta1 C20 C24 -162.43(10) 3_665 . . . ?
N1 Ta1 C20 C24 -77.49(10) . . . . ?
N12 Ta1 C20 C24 14.92(14) . . . . ?
N11 Ta1 C20 C24 97.91(10) . . . . ?
C21 Ta1 C20 C24 112.80(14) . . . . ?
C22 Ta1 C20 C24 75.72(10) . . . . ?
C23 Ta1 C20 C24 36.26(9) . . . . ?
Ta1 Ta1 C20 C24 -118.34(9) 3_665 . . . ?
N1 Ta1 C20 C21 84.77(10) 3_665 . . . ?
N1 Ta1 C20 C21 169.71(10) . . . . ?
N12 Ta1 C20 C21 -97.88(11) . . . . ?
N11 Ta1 C20 C21 -14.89(12) . . . . ?
C24 Ta1 C20 C21 -112.80(14) . . . . ?
C22 Ta1 C20 C21 -37.08(9) . . . . ?
C23 Ta1 C20 C21 -76.55(10) . . . . ?
Ta1 Ta1 C20 C21 128.85(9) 3_665 . . . ?
N1 Ta1 C20 C25 -37.99(14) 3_665 . . . ?
N1 Ta1 C20 C25 46.95(14) . . . . ?
N12 Ta1 C20 C25 139.36(12) . . . . ?
N11 Ta1 C20 C25 -137.65(13) . . . . ?
C21 Ta1 C20 C25 -122.76(18) . . . . ?
C24 Ta1 C20 C25 124.44(18) . . . . ?
C22 Ta1 C20 C25 -159.84(16) . . . . ?
C23 Ta1 C20 C25 160.69(16) . . . . ?
Ta1 Ta1 C20 C25 6.09(14) 3_665 . . . ?
C24 C20 C21 C22 -1.73(18) . . . . ?
C25 C20 C21 C22 -171.20(15) . . . . ?
Ta1 C20 C21 C22 69.64(11) . . . . ?
C24 C20 C21 C26 170.42(15) . . . . ?
C25 C20 C21 C26 1.0(3) . . . . ?
Ta1 C20 C21 C26 -118.21(16) . . . . ?
C24 C20 C21 Ta1 -71.37(11) . . . . ?
C25 C20 C21 Ta1 119.16(16) . . . . ?
N1 Ta1 C21 C22 145.22(10) 3_665 . . . ?
N1 Ta1 C21 C22 -126.00(10) . . . . ?
N12 Ta1 C21 C22 3.87(13) . . . . ?
N11 Ta1 C21 C22 54.50(10) . . . . ?
C20 Ta1 C21 C22 -113.66(14) . . . . ?
C24 Ta1 C21 C22 -75.43(10) . . . . ?
C23 Ta1 C21 C22 -35.88(9) . . . . ?
Ta1 Ta1 C21 C22 -174.08(8) 3_665 . . . ?
N1 Ta1 C21 C20 -101.12(10) 3_665 . . . ?
N1 Ta1 C21 C20 -12.34(12) . . . . ?
N12 Ta1 C21 C20 117.53(10) . . . . ?
N11 Ta1 C21 C20 168.16(10) . . . . ?
C24 Ta1 C21 C20 38.23(9) . . . . ?
C22 Ta1 C21 C20 113.66(14) . . . . ?
C23 Ta1 C21 C20 77.78(10) . . . . ?
Ta1 Ta1 C21 C20 -60.42(10) 3_665 . . . ?
N1 Ta1 C21 C26 17.98(15) 3_665 . . . ?
N1 Ta1 C21 C26 106.76(14) . . . . ?
N12 Ta1 C21 C26 -123.38(13) . . . . ?
N11 Ta1 C21 C26 -72.75(14) . . . . ?
C20 Ta1 C21 C26 119.10(18) . . . . ?
C24 Ta1 C21 C26 157.33(16) . . . . ?
C22 Ta1 C21 C26 -127.24(18) . . . . ?
C23 Ta1 C21 C26 -163.12(16) . . . . ?
Ta1 Ta1 C21 C26 58.67(14) 3_665 . . . ?
C20 C21 C22 C23 0.71(18) . . . . ?
C26 C21 C22 C23 -171.09(16) . . . . ?
Ta1 C21 C22 C23 65.78(11) . . . . ?
C20 C21 C22 C27 173.37(16) . . . . ?
C26 C21 C22 C27 1.6(3) . . . . ?
Ta1 C21 C22 C27 -121.56(16) . . . . ?
C20 C21 C22 Ta1 -65.07(11) . . . . ?
C26 C21 C22 Ta1 123.12(17) . . . . ?
N1 Ta1 C22 C21 -42.33(12) 3_665 . . . ?
N1 Ta1 C22 C21 79.75(12) . . . . ?
N12 Ta1 C22 C21 -177.10(10) . . . . ?
N11 Ta1 C22 C21 -123.16(10) . . . . ?
C20 Ta1 C22 C21 38.78(9) . . . . ?
C24 Ta1 C22 C21 80.27(10) . . . . ?
C23 Ta1 C22 C21 116.35(14) . . . . ?
Ta1 Ta1 C22 C21 10.40(14) 3_665 . . . ?
N1 Ta1 C22 C23 -158.68(10) 3_665 . . . ?
N1 Ta1 C22 C23 -36.60(13) . . . . ?
N12 Ta1 C22 C23 66.55(10) . . . . ?
N11 Ta1 C22 C23 120.49(10) . . . . ?
C20 Ta1 C22 C23 -77.58(10) . . . . ?
C21 Ta1 C22 C23 -116.35(14) . . . . ?
C24 Ta1 C22 C23 -36.08(9) . . . . ?
Ta1 Ta1 C22 C23 -105.95(10) 3_665 . . . ?
N1 Ta1 C22 C27 79.61(16) 3_665 . . . ?
N1 Ta1 C22 C27 -158.31(13) . . . . ?
N12 Ta1 C22 C27 -55.17(15) . . . . ?
N11 Ta1 C22 C27 -1.22(14) . . . . ?
C20 Ta1 C22 C27 160.71(17) . . . . ?
C21 Ta1 C22 C27 121.93(19) . . . . ?
C24 Ta1 C22 C27 -157.80(17) . . . . ?
C23 Ta1 C22 C27 -121.71(19) . . . . ?
Ta1 Ta1 C22 C27 132.33(12) 3_665 . . . ?
C21 C22 C23 C24 0.58(18) . . . . ?
C27 C22 C23 C24 -172.33(15) . . . . ?
Ta1 C22 C23 C24 63.20(11) . . . . ?
C21 C22 C23 C28 173.05(16) . . . . ?
C27 C22 C23 C28 0.1(3) . . . . ?
Ta1 C22 C23 C28 -124.33(16) . . . . ?
C21 C22 C23 Ta1 -62.62(11) . . . . ?
C27 C22 C23 Ta1 124.47(16) . . . . ?
N1 Ta1 C23 C24 -77.80(15) 3_665 . . . ?
N1 Ta1 C23 C24 37.74(11) . . . . ?
N12 Ta1 C23 C24 128.18(10) . . . . ?
N11 Ta1 C23 C24 -173.33(10) . . . . ?
C20 Ta1 C23 C24 -37.89(10) . . . . ?
C21 Ta1 C23 C24 -80.02(11) . . . . ?
C22 Ta1 C23 C24 -116.55(14) . . . . ?
Ta1 Ta1 C23 C24 8.04(13) 3_665 . . . ?
N1 Ta1 C23 C22 38.75(17) 3_665 . . . ?
N1 Ta1 C23 C22 154.29(10) . . . . ?
N12 Ta1 C23 C22 -115.27(10) . . . . ?
N11 Ta1 C23 C22 -56.78(10) . . . . ?
C20 Ta1 C23 C22 78.66(10) . . . . ?
C21 Ta1 C23 C22 36.53(9) . . . . ?
C24 Ta1 C23 C22 116.55(14) . . . . ?
Ta1 Ta1 C23 C22 124.59(9) 3_665 . . . ?
N1 Ta1 C23 C28 159.50(15) 3_665 . . . ?
N1 Ta1 C23 C28 -84.96(16) . . . . ?
N12 Ta1 C23 C28 5.48(15) . . . . ?
N11 Ta1 C23 C28 63.97(16) . . . . ?
C20 Ta1 C23 C28 -160.59(18) . . . . ?
C21 Ta1 C23 C28 157.27(18) . . . . ?
C24 Ta1 C23 C28 -122.7(2) . . . . ?
C22 Ta1 C23 C28 120.7(2) . . . . ?
Ta1 Ta1 C23 C28 -114.67(14) 3_665 . . . ?
C22 C23 C24 C20 -1.64(18) . . . . ?
C28 C23 C24 C20 -173.86(16) . . . . ?
Ta1 C23 C24 C20 62.80(11) . . . . ?
C22 C23 C24 C29 176.17(16) . . . . ?
C28 C23 C24 C29 3.9(3) . . . . ?
Ta1 C23 C24 C29 -119.39(17) . . . . ?
C22 C23 C24 Ta1 -64.44(11) . . . . ?
C28 C23 C24 Ta1 123.34(17) . . . . ?
C21 C20 C24 C23 2.08(18) . . . . ?
C25 C20 C24 C23 171.50(15) . . . . ?
Ta1 C20 C24 C23 -67.85(11) . . . . ?
C21 C20 C24 C29 -175.78(15) . . . . ?
C25 C20 C24 C29 -6.4(3) . . . . ?
Ta1 C20 C24 C29 114.28(16) . . . . ?
C21 C20 C24 Ta1 69.93(11) . . . . ?
C25 C20 C24 Ta1 -120.65(16) . . . . ?
N1 Ta1 C24 C23 138.96(10) 3_665 . . . ?
N1 Ta1 C24 C23 -144.38(11) . . . . ?
N12 Ta1 C24 C23 -54.80(11) . . . . ?
N11 Ta1 C24 C23 8.09(12) . . . . ?
C20 Ta1 C24 C23 115.00(14) . . . . ?
C21 Ta1 C24 C23 76.17(10) . . . . ?
C22 Ta1 C24 C23 35.97(9) . . . . ?
Ta1 Ta1 C24 C23 -174.88(8) 3_665 . . . ?
N1 Ta1 C24 C20 23.96(13) 3_665 . . . ?
N1 Ta1 C24 C20 100.62(10) . . . . ?
N12 Ta1 C24 C20 -169.79(9) . . . . ?
N11 Ta1 C24 C20 -106.91(10) . . . . ?
C21 Ta1 C24 C20 -38.83(9) . . . . ?
C22 Ta1 C24 C20 -79.03(10) . . . . ?
C23 Ta1 C24 C20 -115.00(14) . . . . ?
Ta1 Ta1 C24 C20 70.12(10) 3_665 . . . ?
N1 Ta1 C24 C29 -95.26(15) 3_665 . . . ?
N1 Ta1 C24 C29 -18.61(14) . . . . ?
N12 Ta1 C24 C29 70.98(14) . . . . ?
N11 Ta1 C24 C29 133.87(13) . . . . ?
C20 Ta1 C24 C29 -119.22(18) . . . . ?
C21 Ta1 C24 C29 -158.05(16) . . . . ?
C22 Ta1 C24 C29 161.75(16) . . . . ?
C23 Ta1 C24 C29 125.78(18) . . . . ?
Ta1 Ta1 C24 C29 -49.11(14) 3_665 . . . ?

_diffrn_measured_fraction_theta_max    0.999
_diffrn_reflns_theta_full              30.00
_diffrn_measured_fraction_theta_full   0.999
_refine_diff_density_max    1.129
_refine_diff_density_min   -0.681
_refine_diff_density_rms    0.083
 
_diffrn_orient_matrix_type            standard
_diffrn_orient_matrix_UB_11           0.0046136
_diffrn_orient_matrix_UB_12          -0.0508869
_diffrn_orient_matrix_UB_13          -0.0533814
_diffrn_orient_matrix_UB_21          -0.0283534
_diffrn_orient_matrix_UB_22           0.0630457
_diffrn_orient_matrix_UB_23          -0.0393879
_diffrn_orient_matrix_UB_31           0.0849631
_diffrn_orient_matrix_UB_32           0.0238444
_diffrn_orient_matrix_UB_33          -0.0097048
_symmetry_space_group_name_Hall       '-P 2yn'
_exptl_crystal_id
'Sita/Yonke BY-6-034A (light yellow/brown xtals) @100K'

_diffrn_measurement_details           610,610,610

_diffrn_source_voltage                50.00
_diffrn_source_current                30.00

_diffrn_measurement_specimen_support  'MiTEGen loop'
_diffrn_detector                      'CCD area detector'
_diffrn_detector_type                 'Bruker Smart Apex II'


data_cmpd_cis_4a

_audit_creation_method            'SHELXL-97 & ZCIF'
_chemical_name_systematic
;
cmpd_cis_4a
;
_chemical_name_common             cmpd_cis_4a
_chemical_formula_moiety          'C36 H64 N6 Nb2'
_chemical_formula_sum             'C36 H64 N6 Nb2'
_chemical_formula_weight          766.75

loop_
 _atom_type_symbol
 _atom_type_description
 _atom_type_scat_dispersion_real
 _atom_type_scat_dispersion_imag
 _atom_type_scat_source
 'C'  'C'   0.0033   0.0016
 'International Tables Vol C Tables 4.2.6.8 and 6.1.1.4'
 'H'  'H'   0.0000   0.0000
 'International Tables Vol C Tables 4.2.6.8 and 6.1.1.4'
 'N'  'N'   0.0061   0.0033
 'International Tables Vol C Tables 4.2.6.8 and 6.1.1.4'
 'Nb'  'Nb'  -2.0727   0.6215
 'International Tables Vol C Tables 4.2.6.8 and 6.1.1.4'

_symmetry_cell_setting            Triclinic
_symmetry_space_group_name_H-M    P-1

loop_
 _symmetry_equiv_pos_as_xyz
 'x, y, z'
 '-x, -y, -z'

_cell_length_a                    11.9347(14)
_cell_length_b                    19.054(2)
_cell_length_c                    19.120(2)
_cell_angle_alpha                 112.5059(17)
_cell_angle_beta                  90.9022(17)
_cell_angle_gamma                 102.7028(17)
_cell_volume                      3894.3(8)
_cell_formula_units_Z             4
_cell_measurement_temperature     295(2)
_cell_measurement_reflns_used     19025
_cell_measurement_theta_min       2.2
_cell_measurement_theta_max       29.9

_exptl_crystal_description        prism
_exptl_crystal_colour             red
_exptl_crystal_size_max           0.25
_exptl_crystal_size_mid           0.18
_exptl_crystal_size_min           0.14
_exptl_crystal_density_meas       ?
_exptl_crystal_density_diffrn     1.308
_exptl_crystal_density_method     'not measured'
_exptl_crystal_F_000              1616
_exptl_absorpt_coefficient_mu     0.620
_exptl_absorpt_correction_type    multi-scan
_exptl_absorpt_correction_T_min   0.822
_exptl_absorpt_correction_T_max   0.917
_exptl_absorpt_process_details    'SADABS (Sheldrick, 2008)'

_diffrn_ambient_temperature       295(2)
_diffrn_radiation_wavelength      0.71073
_diffrn_radiation_type            MoK\a
_diffrn_radiation_source          'fine-focus sealed tube'
_diffrn_radiation_monochromator   graphite
_diffrn_measurement_device_type   'three-circle diffractometer'
_diffrn_measurement_method        '\f and \w scans'
_diffrn_detector_area_resol_mean  11.198
_diffrn_reflns_number             55595
_diffrn_reflns_av_R_equivalents   0.0293
_diffrn_reflns_av_sigmaI/netI     0.0319
_diffrn_reflns_limit_h_min        -15
_diffrn_reflns_limit_h_max        15
_diffrn_reflns_limit_k_min        -24
_diffrn_reflns_limit_k_max        24
_diffrn_reflns_limit_l_min        -24
_diffrn_reflns_limit_l_max        24
_diffrn_reflns_theta_min          1.87
_diffrn_reflns_theta_max          27.50
_reflns_number_total              17869
_reflns_number_gt                 14751
_reflns_threshold_expression      >2sigma(I)

_computing_data_collection        'Apex2 (Bruker, 2010)'
_computing_cell_refinement        Apex2
_computing_data_reduction         Apex2
_computing_structure_solution     'SHELXS-97 (Sheldrick, 2008)'
_computing_structure_refinement   'SHELXL-97 (Sheldrick, 2008)'
_computing_molecular_graphics     'XSHEL (Bruker, 2004)'
_computing_publication_material   SHELXL-97

_refine_special_details
;
 Refinement of F^2^ against ALL reflections.  The weighted R-factor wR and
 goodness of fit S are based on F^2^, conventional R-factors R are based
 on F, with F set to zero for negative F^2^. The threshold expression of
 F^2^ > 2sigma(F^2^) is used only for calculating R-factors(gt) etc. and is
 not relevant to the choice of reflections for refinement.  R-factors based
 on F^2^ are statistically about twice as large as those based on F, and R-
 factors based on ALL data will be even larger.
;

_refine_ls_structure_factor_coef  Fsqd
_refine_ls_matrix_type            full
_refine_ls_weighting_scheme       calc
_refine_ls_weighting_details
'w=1/[\s^2^(Fo^2^)+(0.01P)^2^+2.925P], P=(max(Fo^2^,0)+2Fc^2^)/3'
_atom_sites_solution_primary      direct
_atom_sites_solution_secondary    difmap
_atom_sites_solution_hydrogens    geom
_refine_ls_hydrogen_treatment     constr
_refine_ls_extinction_method      none
_refine_ls_extinction_coef        ?
_refine_ls_number_reflns          17869
_refine_ls_number_parameters      833
_refine_ls_number_restraints      0
_refine_ls_R_factor_all           0.0415
_refine_ls_R_factor_gt            0.0300
_refine_ls_wR_factor_ref          0.0603
_refine_ls_wR_factor_gt           0.0573
_refine_ls_goodness_of_fit_ref    1.000
_refine_ls_restrained_S_all       1.000
_refine_ls_shift/su_max           0.003
_refine_ls_shift/su_mean          0.000

loop_
 _atom_site_label
 _atom_site_type_symbol
 _atom_site_fract_x
 _atom_site_fract_y
 _atom_site_fract_z
 _atom_site_U_iso_or_equiv
 _atom_site_adp_type
 _atom_site_occupancy
 _atom_site_symmetry_multiplicity
 _atom_site_calc_flag
 _atom_site_refinement_flags
 _atom_site_disorder_assembly
 _atom_site_disorder_group
Nb1A Nb 1.106252(15) 0.255895(11) 0.781891(10) 0.03022(5) Uani 1 1 d . . .
Nb2A Nb 0.906120(16) 0.250721(12) 0.857311(11) 0.03385(5) Uani 1 1 d . . .
N1A N 0.99796(16) 0.18047(10) 0.80437(11) 0.0411(4) Uani 1 1 d . . .
N2A N 1.02164(15) 0.32775(10) 0.84289(11) 0.0402(4) Uani 1 1 d . . .
N11A N 1.08412(15) 0.16803(11) 0.65521(10) 0.0384(4) Uani 1 1 d . . .
N12A N 1.07089(16) 0.28880(11) 0.68634(10) 0.0392(4) Uani 1 1 d . . .
C10A C 1.05628(18) 0.21828(14) 0.63016(12) 0.0400(5) Uani 1 1 d . . .
C11A C 1.0132(2) 0.19762(17) 0.54823(14) 0.0594(7) Uani 1 1 d . . .
H11A H 0.9794 0.2379 0.5454 0.089 Uiso 1 1 calc R . .
H11B H 0.9560 0.1486 0.5294 0.089 Uiso 1 1 calc R . .
H11C H 1.0766 0.1932 0.5179 0.089 Uiso 1 1 calc R . .
C12A C 1.0651(2) 0.08454(14) 0.60565(13) 0.0467(6) Uani 1 1 d . . .
H12A H 0.9971 0.0708 0.5693 0.056 Uiso 1 1 calc R . .
C13A C 1.0376(2) 0.03449(15) 0.65186(16) 0.0596(7) Uani 1 1 d . . .
H13A H 1.1036 0.0453 0.6870 0.089 Uiso 1 1 calc R . .
H13B H 1.0185 -0.0199 0.6182 0.089 Uiso 1 1 calc R . .
H13C H 0.9731 0.0465 0.6796 0.089 Uiso 1 1 calc R . .
C14A C 1.1665(2) 0.06730(17) 0.55950(15) 0.0639(8) Uani 1 1 d . . .
H14A H 1.1798 0.0988 0.5301 0.096 Uiso 1 1 calc R . .
H14B H 1.1487 0.0129 0.5260 0.096 Uiso 1 1 calc R . .
H14C H 1.2345 0.0794 0.5935 0.096 Uiso 1 1 calc R . .
C15A C 1.0409(2) 0.35747(15) 0.68133(14) 0.0472(6) Uani 1 1 d . . .
H15A H 1.0623 0.3991 0.7325 0.057 Uiso 1 1 calc R . .
C16A C 0.9114(2) 0.34619(19) 0.66394(17) 0.0674(8) Uani 1 1 d . . .
H16A H 0.8869 0.3102 0.6121 0.101 Uiso 1 1 calc R . .
H16B H 0.8956 0.3957 0.6714 0.101 Uiso 1 1 calc R . .
H16C H 0.8704 0.3256 0.6974 0.101 Uiso 1 1 calc R . .
C17A C 1.1109(3) 0.38928(17) 0.62843(17) 0.0666(8) Uani 1 1 d . . .
H17A H 1.1916 0.3945 0.6401 0.100 Uiso 1 1 calc R . .
H17B H 1.0982 0.4395 0.6357 0.100 Uiso 1 1 calc R . .
H17C H 1.0865 0.3537 0.5764 0.100 Uiso 1 1 calc R . .
C20A C 1.30675(17) 0.23035(14) 0.78332(13) 0.0387(5) Uani 1 1 d . . .
C21A C 1.31899(17) 0.28801(14) 0.75247(13) 0.0406(5) Uani 1 1 d . . .
C22A C 1.30227(18) 0.35731(14) 0.80987(14) 0.0441(6) Uani 1 1 d . . .
C23A C 1.27811(19) 0.34245(14) 0.87527(13) 0.0447(6) Uani 1 1 d . . .
C24A C 1.27926(18) 0.26339(14) 0.85866(13) 0.0407(5) Uani 1 1 d . . .
C25A C 1.3337(2) 0.15167(16) 0.74940(16) 0.0592(7) Uani 1 1 d . . .
H25A H 1.4039 0.1530 0.7757 0.089 Uiso 1 1 calc R . .
H25B H 1.3429 0.1387 0.6965 0.089 Uiso 1 1 calc R . .
H25C H 1.2715 0.1128 0.7544 0.089 Uiso 1 1 calc R . .
C26A C 1.3497(2) 0.27957(18) 0.67410(14) 0.0572(7) Uani 1 1 d . . .
H26A H 1.2858 0.2832 0.6457 0.086 Uiso 1 1 calc R . .
H26B H 1.3670 0.2296 0.6484 0.086 Uiso 1 1 calc R . .
H26C H 1.4161 0.3205 0.6783 0.086 Uiso 1 1 calc R . .
C27A C 1.3125(3) 0.43491(16) 0.80457(19) 0.0731(9) Uani 1 1 d . . .
H27A H 1.3798 0.4719 0.8366 0.110 Uiso 1 1 calc R . .
H27B H 1.2450 0.4535 0.8210 0.110 Uiso 1 1 calc R . .
H27C H 1.3193 0.4290 0.7528 0.110 Uiso 1 1 calc R . .
C28A C 1.2689(3) 0.40474(17) 0.95077(16) 0.0708(9) Uani 1 1 d . . .
H28A H 1.3324 0.4497 0.9621 0.106 Uiso 1 1 calc R . .
H28B H 1.2710 0.3849 0.9898 0.106 Uiso 1 1 calc R . .
H28C H 1.1974 0.4195 0.9486 0.106 Uiso 1 1 calc R . .
C29A C 1.2774(2) 0.22394(18) 0.91353(15) 0.0632(8) Uani 1 1 d . . .
H29A H 1.2290 0.1717 0.8905 0.095 Uiso 1 1 calc R . .
H29B H 1.2476 0.2531 0.9591 0.095 Uiso 1 1 calc R . .
H29C H 1.3545 0.2218 0.9259 0.095 Uiso 1 1 calc R . .
N31A N 0.76817(15) 0.31338(11) 0.82640(11) 0.0404(4) Uani 1 1 d . . .
N32A N 0.76155(15) 0.18798(11) 0.76833(10) 0.0399(4) Uani 1 1 d . . .
C30A C 0.72008(18) 0.24795(14) 0.76854(13) 0.0389(5) Uani 1 1 d . . .
C31A C 0.6297(2) 0.24196(16) 0.70889(16) 0.0580(7) Uani 1 1 d . . .
H31A H 0.5678 0.2630 0.7333 0.087 Uiso 1 1 calc R . .
H31B H 0.6000 0.1880 0.6754 0.087 Uiso 1 1 calc R . .
H31C H 0.6639 0.2711 0.6800 0.087 Uiso 1 1 calc R . .
C32A C 0.7451(2) 0.38789(14) 0.83171(15) 0.0519(6) Uani 1 1 d . . .
H32A H 0.7273 0.3833 0.7797 0.062 Uiso 1 1 calc R . .
C33A C 0.8520(3) 0.45462(15) 0.86742(17) 0.0669(8) Uani 1 1 d . . .
H33A H 0.8677 0.4636 0.9200 0.100 Uiso 1 1 calc R . .
H33B H 0.8392 0.5013 0.8641 0.100 Uiso 1 1 calc R . .
H33C H 0.9168 0.4412 0.8408 0.100 Uiso 1 1 calc R . .
C34A C 0.6406(3) 0.40498(18) 0.87457(18) 0.0714(9) Uani 1 1 d . . .
H34A H 0.5735 0.3635 0.8488 0.107 Uiso 1 1 calc R . .
H34B H 0.6280 0.4536 0.8763 0.107 Uiso 1 1 calc R . .
H34C H 0.6549 0.4086 0.9255 0.107 Uiso 1 1 calc R . .
C35A C 0.72921(19) 0.10734(14) 0.71093(14) 0.0460(6) Uani 1 1 d . . .
H35A H 0.7731 0.0782 0.7284 0.055 Uiso 1 1 calc R . .
C36A C 0.7667(2) 0.10009(17) 0.63331(15) 0.0638(8) Uani 1 1 d . . .
H36A H 0.7204 0.1230 0.6108 0.096 Uiso 1 1 calc R . .
H36B H 0.7567 0.0458 0.6010 0.096 Uiso 1 1 calc R . .
H36C H 0.8465 0.1270 0.6392 0.096 Uiso 1 1 calc R . .
C37A C 0.6011(2) 0.06560(16) 0.70475(19) 0.0696(9) Uani 1 1 d . . .
H37A H 0.5741 0.0836 0.7541 0.104 Uiso 1 1 calc R . .
H37B H 0.5931 0.0101 0.6861 0.104 Uiso 1 1 calc R . .
H37C H 0.5563 0.0771 0.6702 0.104 Uiso 1 1 calc R . .
C40A C 0.8498(2) 0.30288(15) 0.99015(13) 0.0494(6) Uani 1 1 d . . .
C41A C 0.7542(2) 0.23937(16) 0.95139(14) 0.0500(6) Uani 1 1 d . . .
C42A C 0.7922(2) 0.16945(15) 0.93023(14) 0.0485(6) Uani 1 1 d . . .
C43A C 0.9104(2) 0.18913(15) 0.95503(14) 0.0480(6) Uani 1 1 d . . .
C44A C 0.9470(2) 0.27214(15) 0.99170(13) 0.0487(6) Uani 1 1 d . . .
C45A C 0.8498(3) 0.38810(17) 1.02974(16) 0.0745(9) Uani 1 1 d . . .
H45A H 0.7758 0.3955 1.0181 0.112 Uiso 1 1 calc R . .
H45B H 0.9088 0.4190 1.0126 0.112 Uiso 1 1 calc R . .
H45C H 0.8649 0.4042 1.0838 0.112 Uiso 1 1 calc R . .
C46A C 0.6311(2) 0.2423(2) 0.93874(18) 0.0731(9) Uani 1 1 d . . .
H46A H 0.6103 0.2277 0.8855 0.110 Uiso 1 1 calc R . .
H46B H 0.6230 0.2944 0.9669 0.110 Uiso 1 1 calc R . .
H46C H 0.5812 0.2065 0.9558 0.110 Uiso 1 1 calc R . .
C47A C 0.7176(3) 0.08737(17) 0.89310(19) 0.0764(9) Uani 1 1 d . . .
H47A H 0.7032 0.0654 0.9306 0.115 Uiso 1 1 calc R . .
H47B H 0.7565 0.0559 0.8541 0.115 Uiso 1 1 calc R . .
H47C H 0.6456 0.0884 0.8709 0.115 Uiso 1 1 calc R . .
C48A C 0.9816(3) 0.13124(18) 0.94810(18) 0.0715(8) Uani 1 1 d . . .
H48A H 1.0000 0.1095 0.8967 0.107 Uiso 1 1 calc R . .
H48B H 0.9387 0.0900 0.9612 0.107 Uiso 1 1 calc R . .
H48C H 1.0518 0.1573 0.9820 0.107 Uiso 1 1 calc R . .
C49A C 1.0588(3) 0.31742(19) 1.04177(16) 0.0741(9) Uani 1 1 d . . .
H49A H 1.0478 0.3249 1.0935 0.111 Uiso 1 1 calc R . .
H49B H 1.0829 0.3675 1.0385 0.111 Uiso 1 1 calc R . .
H49C H 1.1170 0.2888 1.0252 0.111 Uiso 1 1 calc R . .
Nb1B Nb 0.644242(16) 0.237145(12) 0.338356(11) 0.03360(5) Uani 1 1 d . . .
Nb2B Nb 0.425040(15) 0.257863(12) 0.307593(11) 0.03233(5) Uani 1 1 d . . .
N1B N 0.49589(15) 0.17297(11) 0.29402(11) 0.0392(4) Uani 1 1 d . . .
N2B N 0.57018(15) 0.32152(11) 0.35945(11) 0.0431(5) Uani 1 1 d . . .
N11B N 0.72339(15) 0.15446(11) 0.23123(10) 0.0390(4) Uani 1 1 d . . .
N12B N 0.76088(16) 0.28224(11) 0.26970(11) 0.0421(4) Uani 1 1 d . . .
C10B C 0.76844(18) 0.21490(14) 0.21461(13) 0.0386(5) Uani 1 1 d . . .
C11B C 0.8201(2) 0.20816(16) 0.14129(14) 0.0547(7) Uani 1 1 d . . .
H11D H 0.7597 0.1852 0.0997 0.082 Uiso 1 1 calc R . .
H11E H 0.8738 0.1757 0.1327 0.082 Uiso 1 1 calc R . .
H11F H 0.8596 0.2593 0.1450 0.082 Uiso 1 1 calc R . .
C12B C 0.7111(2) 0.07409(14) 0.17501(15) 0.0482(6) Uani 1 1 d . . .
H12B H 0.6993 0.0742 0.1242 0.058 Uiso 1 1 calc R . .
C13B C 0.6048(2) 0.01961(16) 0.18558(18) 0.0656(8) Uani 1 1 d . . .
H13D H 0.6146 0.0179 0.2348 0.098 Uiso 1 1 calc R . .
H13E H 0.5949 -0.0321 0.1468 0.098 Uiso 1 1 calc R . .
H13F H 0.5378 0.0386 0.1818 0.098 Uiso 1 1 calc R . .
C14B C 0.8187(2) 0.04403(17) 0.17852(18) 0.0683(8) Uani 1 1 d . . .
H14D H 0.8846 0.0788 0.1712 0.102 Uiso 1 1 calc R . .
H14E H 0.8083 -0.0074 0.1392 0.102 Uiso 1 1 calc R . .
H14F H 0.8308 0.0419 0.2273 0.102 Uiso 1 1 calc R . .
C15B C 0.7943(2) 0.36045(15) 0.26804(17) 0.0543(7) Uani 1 1 d . . .
H15B H 0.7762 0.3964 0.3166 0.065 Uiso 1 1 calc R . .
C16B C 0.7217(3) 0.3681(2) 0.2066(2) 0.0780(10) Uani 1 1 d . . .
H16D H 0.7384 0.3357 0.1574 0.117 Uiso 1 1 calc R . .
H16E H 0.7396 0.4217 0.2122 0.117 Uiso 1 1 calc R . .
H16F H 0.6412 0.3516 0.2115 0.117 Uiso 1 1 calc R . .
C17B C 0.9238(2) 0.39000(18) 0.2657(2) 0.0829(10) Uani 1 1 d . . .
H17D H 0.9669 0.3832 0.3045 0.124 Uiso 1 1 calc R . .
H17E H 0.9408 0.4445 0.2746 0.124 Uiso 1 1 calc R . .
H17F H 0.9449 0.3608 0.2167 0.124 Uiso 1 1 calc R . .
C20B C 0.7418(2) 0.18069(16) 0.41489(13) 0.0462(6) Uani 1 1 d . . .
C21B C 0.8334(2) 0.23825(17) 0.40871(14) 0.0504(6) Uani 1 1 d . . .
C22B C 0.8107(2) 0.31248(17) 0.44991(15) 0.0572(7) Uani 1 1 d . . .
C23B C 0.7059(2) 0.30059(18) 0.48055(14) 0.0570(7) Uani 1 1 d . . .
C24B C 0.6622(2) 0.21959(18) 0.45878(14) 0.0513(6) Uani 1 1 d . . .
C25B C 0.7344(3) 0.09506(18) 0.38956(18) 0.0734(9) Uani 1 1 d . . .
H25D H 0.7845 0.0797 0.3506 0.110 Uiso 1 1 calc R . .
H25E H 0.6563 0.0659 0.3697 0.110 Uiso 1 1 calc R . .
H25F H 0.7577 0.0846 0.4321 0.110 Uiso 1 1 calc R . .
C26B C 0.9397(2) 0.2242(2) 0.36995(17) 0.0731(9) Uani 1 1 d . . .
H26D H 0.9404 0.2386 0.3270 0.110 Uiso 1 1 calc R . .
H26E H 0.9393 0.1698 0.3529 0.110 Uiso 1 1 calc R . .
H26F H 1.0072 0.2553 0.4052 0.110 Uiso 1 1 calc R . .
C27B C 0.8874(3) 0.3916(2) 0.4623(2) 0.0986(13) Uani 1 1 d . . .
H27D H 0.9241 0.4166 0.5137 0.148 Uiso 1 1 calc R . .
H27E H 0.8416 0.4236 0.4533 0.148 Uiso 1 1 calc R . .
H27F H 0.9453 0.3850 0.4276 0.148 Uiso 1 1 calc R . .
C28B C 0.6574(3) 0.3655(2) 0.53372(18) 0.0922(12) Uani 1 1 d . . .
H28D H 0.6199 0.3870 0.5047 0.138 Uiso 1 1 calc R . .
H28E H 0.7190 0.4059 0.5687 0.138 Uiso 1 1 calc R . .
H28F H 0.6025 0.3451 0.5615 0.138 Uiso 1 1 calc R . .
C29B C 0.5634(3) 0.1787(2) 0.48915(18) 0.0821(11) Uani 1 1 d . . .
H29D H 0.5939 0.1614 0.5247 0.123 Uiso 1 1 calc R . .
H29E H 0.5164 0.1344 0.4477 0.123 Uiso 1 1 calc R . .
H29F H 0.5173 0.2145 0.5143 0.123 Uiso 1 1 calc R . .
N31B N 0.42195(16) 0.34747(12) 0.24987(11) 0.0430(5) Uani 1 1 d . . .
N32B N 0.39617(16) 0.22116(12) 0.18445(10) 0.0434(5) Uani 1 1 d . . .
C30B C 0.4133(2) 0.29136(16) 0.18169(14) 0.0458(6) Uani 1 1 d . . .
C31B C 0.4227(3) 0.3058(2) 0.10912(16) 0.0728(9) Uani 1 1 d . . .
H31D H 0.3545 0.3198 0.0974 0.109 Uiso 1 1 calc R . .
H31E H 0.4303 0.2590 0.0680 0.109 Uiso 1 1 calc R . .
H31F H 0.4893 0.3476 0.1160 0.109 Uiso 1 1 calc R . .
C32B C 0.4577(2) 0.43077(16) 0.26247(16) 0.0576(7) Uani 1 1 d . . .
H32B H 0.5109 0.4351 0.2250 0.069 Uiso 1 1 calc R . .
C33B C 0.5234(3) 0.47905(16) 0.34074(18) 0.0696(8) Uani 1 1 d . . .
H33D H 0.4746 0.4741 0.3789 0.104 Uiso 1 1 calc R . .
H33E H 0.5465 0.5330 0.3477 0.104 Uiso 1 1 calc R . .
H33F H 0.5907 0.4606 0.3453 0.104 Uiso 1 1 calc R . .
C34B C 0.3556(3) 0.4632(2) 0.2500(2) 0.0880(11) Uani 1 1 d . . .
H34D H 0.3143 0.4307 0.2007 0.132 Uiso 1 1 calc R . .
H34E H 0.3840 0.5156 0.2532 0.132 Uiso 1 1 calc R . .
H34F H 0.3048 0.4635 0.2885 0.132 Uiso 1 1 calc R . .
C35B C 0.3857(2) 0.14516(16) 0.12101(14) 0.0542(7) Uani 1 1 d . . .
H35B H 0.3699 0.1063 0.1438 0.065 Uiso 1 1 calc R . .
C36B C 0.4979(3) 0.1369(2) 0.08557(17) 0.0759(9) Uani 1 1 d . . .
H36D H 0.5149 0.1706 0.0585 0.114 Uiso 1 1 calc R . .
H36E H 0.4898 0.0835 0.0508 0.114 Uiso 1 1 calc R . .
H36F H 0.5597 0.1512 0.1250 0.114 Uiso 1 1 calc R . .
C37B C 0.2833(3) 0.1208(2) 0.06010(17) 0.0836(10) Uani 1 1 d . . .
H37D H 0.2153 0.1307 0.0844 0.125 Uiso 1 1 calc R . .
H37E H 0.2703 0.0660 0.0286 0.125 Uiso 1 1 calc R . .
H37F H 0.3002 0.1506 0.0292 0.125 Uiso 1 1 calc R . .
C40B C 0.2577(2) 0.30903(15) 0.37094(15) 0.0493(6) Uani 1 1 d . . .
C41B C 0.20529(19) 0.25209(16) 0.29878(15) 0.0495(6) Uani 1 1 d . . .
C42B C 0.21260(19) 0.17839(16) 0.29582(15) 0.0507(6) Uani 1 1 d . . .
C43B C 0.2715(2) 0.18934(16) 0.36483(16) 0.0519(6) Uani 1 1 d . . .
C44B C 0.3012(2) 0.27032(17) 0.41125(14) 0.0492(6) Uani 1 1 d . . .
C45B C 0.2534(3) 0.39372(18) 0.4053(2) 0.0817(10) Uani 1 1 d . . .
H45D H 0.2362 0.4100 0.3656 0.122 Uiso 1 1 calc R . .
H45E H 0.3269 0.4252 0.4332 0.122 Uiso 1 1 calc R . .
H45F H 0.1944 0.3999 0.4392 0.122 Uiso 1 1 calc R . .
C46B C 0.1451(2) 0.2663(2) 0.23754(18) 0.0766(10) Uani 1 1 d . . .
H46D H 0.1853 0.2524 0.1930 0.115 Uiso 1 1 calc R . .
H46E H 0.1447 0.3206 0.2554 0.115 Uiso 1 1 calc R . .
H46F H 0.0671 0.2348 0.2252 0.115 Uiso 1 1 calc R . .
C47B C 0.1629(3) 0.10005(19) 0.2325(2) 0.0867(11) Uani 1 1 d . . .
H47D H 0.0989 0.0717 0.2486 0.130 Uiso 1 1 calc R . .
H47E H 0.2211 0.0709 0.2199 0.130 Uiso 1 1 calc R . .
H47F H 0.1367 0.1073 0.1886 0.130 Uiso 1 1 calc R . .
C48B C 0.2870(3) 0.1232(2) 0.3854(2) 0.0830(10) Uani 1 1 d . . .
H48D H 0.2156 0.0837 0.3722 0.124 Uiso 1 1 calc R . .
H48E H 0.3096 0.1426 0.4392 0.124 Uiso 1 1 calc R . .
H48F H 0.3459 0.1008 0.3580 0.124 Uiso 1 1 calc R . .
C49B C 0.3452(3) 0.3078(2) 0.49448(16) 0.0844(11) Uani 1 1 d . . .
H49D H 0.2810 0.3118 0.5242 0.127 Uiso 1 1 calc R . .
H49E H 0.3935 0.3592 0.5062 0.127 Uiso 1 1 calc R . .
H49F H 0.3891 0.2764 0.5062 0.127 Uiso 1 1 calc R . .

loop_
 _atom_site_aniso_label
 _atom_site_aniso_U_11
 _atom_site_aniso_U_22
 _atom_site_aniso_U_33
 _atom_site_aniso_U_23
 _atom_site_aniso_U_13
 _atom_site_aniso_U_12
Nb1A 0.02780(9) 0.03635(11) 0.02805(10) 0.01489(8) 0.00243(7) 0.00703(7)
Nb2A 0.03305(10) 0.03822(11) 0.02823(10) 0.01281(9) 0.00629(7) 0.00511(8)
N1A 0.0461(11) 0.0331(10) 0.0412(11) 0.0132(9) 0.0139(9) 0.0060(8)
N2A 0.0407(10) 0.0349(10) 0.0477(12) 0.0182(9) 0.0127(9) 0.0107(8)
N11A 0.0427(10) 0.0384(11) 0.0303(10) 0.0110(8) 0.0016(8) 0.0078(8)
N12A 0.0448(10) 0.0448(11) 0.0331(10) 0.0180(9) 0.0032(8) 0.0165(9)
C10A 0.0350(11) 0.0552(15) 0.0295(12) 0.0168(11) 0.0051(9) 0.0101(10)
C11A 0.0734(18) 0.0702(19) 0.0342(14) 0.0215(13) -0.0037(12) 0.0161(15)
C12A 0.0467(13) 0.0437(14) 0.0389(13) 0.0053(11) 0.0009(10) 0.0101(11)
C13A 0.0630(17) 0.0393(15) 0.0685(19) 0.0132(14) 0.0115(14) 0.0115(13)
C14A 0.0662(18) 0.0628(18) 0.0495(16) 0.0053(14) 0.0144(14) 0.0203(15)
C15A 0.0557(14) 0.0551(15) 0.0444(14) 0.0277(12) 0.0123(11) 0.0254(12)
C16A 0.0627(17) 0.091(2) 0.072(2) 0.0461(18) 0.0162(15) 0.0412(17)
C17A 0.079(2) 0.0679(19) 0.075(2) 0.0455(17) 0.0270(16) 0.0290(16)
C20A 0.0279(10) 0.0494(14) 0.0412(13) 0.0199(11) 0.0007(9) 0.0110(9)
C21A 0.0254(10) 0.0588(15) 0.0422(13) 0.0263(12) 0.0040(9) 0.0077(10)
C22A 0.0314(11) 0.0457(14) 0.0542(15) 0.0243(12) 0.0009(10) -0.0005(10)
C23A 0.0358(12) 0.0488(15) 0.0403(13) 0.0123(11) -0.0016(10) 0.0027(10)
C24A 0.0336(11) 0.0540(15) 0.0353(12) 0.0213(11) -0.0030(9) 0.0059(10)
C25A 0.0503(15) 0.0653(18) 0.0663(18) 0.0241(15) 0.0031(13) 0.0266(13)
C26A 0.0385(13) 0.092(2) 0.0545(16) 0.0421(16) 0.0142(11) 0.0175(13)
C27A 0.0651(18) 0.0549(18) 0.099(2) 0.0406(18) 0.0009(17) -0.0049(14)
C28A 0.0730(19) 0.0600(19) 0.0524(18) 0.0008(15) 0.0037(14) 0.0021(15)
C29A 0.0589(16) 0.093(2) 0.0527(17) 0.0442(17) -0.0004(13) 0.0200(16)
N31A 0.0399(10) 0.0368(11) 0.0430(11) 0.0134(9) 0.0047(8) 0.0111(8)
N32A 0.0386(10) 0.0363(10) 0.0387(11) 0.0084(9) 0.0027(8) 0.0092(8)
C30A 0.0300(10) 0.0438(13) 0.0406(13) 0.0140(11) 0.0075(9) 0.0090(9)
C31A 0.0435(14) 0.0584(17) 0.0630(18) 0.0148(14) -0.0108(12) 0.0130(12)
C32A 0.0612(16) 0.0436(14) 0.0518(16) 0.0158(12) 0.0065(12) 0.0205(12)
C33A 0.084(2) 0.0390(15) 0.072(2) 0.0177(14) 0.0045(16) 0.0132(14)
C34A 0.077(2) 0.0649(19) 0.077(2) 0.0212(17) 0.0183(17) 0.0394(16)
C35A 0.0379(12) 0.0394(13) 0.0496(15) 0.0062(11) 0.0035(10) 0.0088(10)
C36A 0.0548(16) 0.0692(19) 0.0497(16) 0.0025(14) 0.0075(13) 0.0185(14)
C37A 0.0431(14) 0.0475(16) 0.095(2) 0.0092(16) 0.0099(15) -0.0005(12)
C40A 0.0652(16) 0.0492(15) 0.0336(13) 0.0161(12) 0.0203(12) 0.0130(13)
C41A 0.0499(14) 0.0658(17) 0.0419(14) 0.0288(13) 0.0208(11) 0.0143(13)
C42A 0.0526(14) 0.0508(15) 0.0430(14) 0.0239(12) 0.0152(11) 0.0042(12)
C43A 0.0552(15) 0.0554(16) 0.0409(14) 0.0273(12) 0.0132(11) 0.0124(12)
C44A 0.0536(14) 0.0574(16) 0.0323(13) 0.0196(12) 0.0080(11) 0.0044(12)
C45A 0.115(3) 0.0618(19) 0.0488(17) 0.0193(15) 0.0288(17) 0.0289(18)
C46A 0.0542(16) 0.103(3) 0.084(2) 0.054(2) 0.0356(16) 0.0270(17)
C47A 0.081(2) 0.0593(19) 0.079(2) 0.0309(17) 0.0099(17) -0.0088(16)
C48A 0.077(2) 0.078(2) 0.081(2) 0.0485(19) 0.0219(17) 0.0281(17)
C49A 0.0682(19) 0.092(2) 0.0452(16) 0.0229(16) -0.0012(14) -0.0057(17)
Nb1B 0.03040(9) 0.04437(12) 0.03272(11) 0.02112(9) 0.00408(7) 0.01158(8)
Nb2B 0.02838(9) 0.04288(11) 0.03081(10) 0.01824(9) 0.00736(7) 0.01177(8)
N1B 0.0331(9) 0.0390(11) 0.0453(11) 0.0152(9) 0.0070(8) 0.0110(8)
N2B 0.0369(10) 0.0405(11) 0.0525(12) 0.0190(10) -0.0031(9) 0.0101(8)
N11B 0.0353(9) 0.0437(11) 0.0412(11) 0.0191(9) 0.0093(8) 0.0113(8)
N12B 0.0470(11) 0.0437(11) 0.0459(12) 0.0252(10) 0.0132(9) 0.0170(9)
C10B 0.0307(10) 0.0538(15) 0.0396(13) 0.0249(12) 0.0092(9) 0.0144(10)
C11B 0.0545(15) 0.0661(18) 0.0526(16) 0.0313(14) 0.0223(12) 0.0176(13)
C12B 0.0481(14) 0.0469(15) 0.0499(15) 0.0184(12) 0.0098(11) 0.0136(11)
C13B 0.0600(17) 0.0473(16) 0.080(2) 0.0195(15) 0.0084(15) 0.0041(13)
C14B 0.0645(18) 0.0575(18) 0.082(2) 0.0198(16) 0.0166(16) 0.0272(15)
C15B 0.0503(14) 0.0486(15) 0.0769(19) 0.0342(14) 0.0228(13) 0.0192(12)
C16B 0.078(2) 0.091(2) 0.111(3) 0.078(2) 0.0396(19) 0.0391(18)
C17B 0.0577(18) 0.0559(19) 0.133(3) 0.036(2) 0.0296(19) 0.0114(15)
C20B 0.0483(13) 0.0640(17) 0.0401(13) 0.0293(13) 0.0023(10) 0.0249(12)
C21B 0.0371(12) 0.0792(19) 0.0442(14) 0.0314(14) -0.0001(10) 0.0204(12)
C22B 0.0537(15) 0.0626(18) 0.0514(16) 0.0210(14) -0.0171(12) 0.0107(13)
C23B 0.0604(16) 0.072(2) 0.0376(14) 0.0124(14) -0.0058(12) 0.0313(15)
C24B 0.0484(14) 0.082(2) 0.0355(13) 0.0298(14) 0.0063(11) 0.0278(14)
C25B 0.089(2) 0.077(2) 0.075(2) 0.0430(18) 0.0039(17) 0.0362(18)
C26B 0.0402(14) 0.121(3) 0.072(2) 0.048(2) 0.0077(13) 0.0293(16)
C27B 0.092(3) 0.080(2) 0.105(3) 0.037(2) -0.038(2) -0.011(2)
C28B 0.100(3) 0.103(3) 0.057(2) -0.0022(19) -0.0075(18) 0.056(2)
C29B 0.0670(19) 0.145(3) 0.065(2) 0.069(2) 0.0218(16) 0.036(2)
N31B 0.0454(11) 0.0502(12) 0.0441(12) 0.0278(10) 0.0076(9) 0.0159(9)
N32B 0.0484(11) 0.0512(12) 0.0335(10) 0.0169(9) 0.0035(8) 0.0178(9)
C30B 0.0423(13) 0.0682(17) 0.0399(14) 0.0313(13) 0.0055(10) 0.0210(12)
C31B 0.098(2) 0.092(2) 0.0477(17) 0.0434(17) 0.0086(16) 0.0327(19)
C32B 0.0685(17) 0.0550(17) 0.0667(19) 0.0388(15) 0.0196(14) 0.0219(14)
C33B 0.080(2) 0.0477(17) 0.080(2) 0.0262(16) 0.0157(17) 0.0100(15)
C34B 0.104(3) 0.084(2) 0.112(3) 0.063(2) 0.022(2) 0.050(2)
C35B 0.0595(16) 0.0602(17) 0.0378(14) 0.0135(13) -0.0022(12) 0.0158(13)
C36B 0.086(2) 0.090(2) 0.0542(18) 0.0191(17) 0.0138(16) 0.0429(19)
C37B 0.080(2) 0.093(3) 0.058(2) 0.0126(18) -0.0194(16) 0.0148(19)
C40B 0.0389(12) 0.0544(16) 0.0614(17) 0.0248(14) 0.0247(12) 0.0200(11)
C41B 0.0299(11) 0.0717(18) 0.0562(16) 0.0317(14) 0.0137(11) 0.0187(11)
C42B 0.0307(11) 0.0569(16) 0.0605(17) 0.0201(14) 0.0145(11) 0.0078(11)
C43B 0.0401(13) 0.0645(18) 0.0675(18) 0.0391(15) 0.0258(12) 0.0197(12)
C44B 0.0384(12) 0.0720(18) 0.0429(14) 0.0261(13) 0.0193(11) 0.0178(12)
C45B 0.079(2) 0.069(2) 0.107(3) 0.034(2) 0.047(2) 0.0362(17)
C46B 0.0432(15) 0.122(3) 0.084(2) 0.053(2) 0.0070(15) 0.0360(17)
C47B 0.0566(18) 0.073(2) 0.098(3) 0.010(2) 0.0148(17) -0.0058(16)
C48B 0.071(2) 0.091(2) 0.125(3) 0.078(2) 0.037(2) 0.0268(18)
C49B 0.071(2) 0.138(3) 0.0455(17) 0.0300(19) 0.0242(15) 0.040(2)

_geom_special_details
;
 All esds (except the esd in the dihedral angle between two l.s. planes)
 are estimated using the full covariance matrix.  The cell esds are taken
 into account individually in the estimation of esds in distances, angles
 and torsion angles; correlations between esds in cell parameters are only
 used when they are defined by crystal symmetry.  An approximate (isotropic)
 treatment of cell esds is used for estimating esds involving l.s. planes.
;

loop_
 _geom_bond_atom_site_label_1
 _geom_bond_atom_site_label_2
 _geom_bond_distance
 _geom_bond_site_symmetry_2
 _geom_bond_publ_flag
Nb1A N1A 1.8959(18) . ?
Nb1A N2A 1.9176(18) . ?
Nb1A N12A 2.2085(17) . ?
Nb1A N11A 2.3282(18) . ?
Nb1A C24A 2.460(2) . ?
Nb1A C23A 2.502(2) . ?
Nb1A C20A 2.546(2) . ?
Nb1A C22A 2.583(2) . ?
Nb1A C21A 2.601(2) . ?
Nb1A Nb2A 2.8121(3) . ?
Nb2A N2A 1.8875(18) . ?
Nb2A N1A 1.9133(18) . ?
Nb2A N32A 2.1781(18) . ?
Nb2A N31A 2.4206(18) . ?
Nb2A C44A 2.465(2) . ?
Nb2A C40A 2.511(2) . ?
Nb2A C43A 2.564(2) . ?
Nb2A C41A 2.607(2) . ?
Nb2A C42A 2.641(2) . ?
N11A C10A 1.320(3) . ?
N11A C12A 1.470(3) . ?
N12A C10A 1.333(3) . ?
N12A C15A 1.466(3) . ?
C10A C11A 1.512(3) . ?
C11A H11A 0.9600 . ?
C11A H11B 0.9600 . ?
C11A H11C 0.9600 . ?
C12A C13A 1.521(4) . ?
C12A C14A 1.528(3) . ?
C12A H12A 0.9800 . ?
C13A H13A 0.9600 . ?
C13A H13B 0.9600 . ?
C13A H13C 0.9600 . ?
C14A H14A 0.9600 . ?
C14A H14B 0.9600 . ?
C14A H14C 0.9600 . ?
C15A C16A 1.525(3) . ?
C15A C17A 1.537(3) . ?
C15A H15A 0.9800 . ?
C16A H16A 0.9600 . ?
C16A H16B 0.9600 . ?
C16A H16C 0.9600 . ?
C17A H17A 0.9600 . ?
C17A H17B 0.9600 . ?
C17A H17C 0.9600 . ?
C20A C24A 1.411(3) . ?
C20A C21A 1.416(3) . ?
C20A C25A 1.498(3) . ?
C21A C22A 1.415(3) . ?
C21A C26A 1.505(3) . ?
C22A C23A 1.405(3) . ?
C22A C27A 1.499(3) . ?
C23A C24A 1.419(3) . ?
C23A C28A 1.502(3) . ?
C24A C29A 1.504(3) . ?
C25A H25A 0.9600 . ?
C25A H25B 0.9600 . ?
C25A H25C 0.9600 . ?
C26A H26A 0.9600 . ?
C26A H26B 0.9600 . ?
C26A H26C 0.9600 . ?
C27A H27A 0.9600 . ?
C27A H27B 0.9600 . ?
C27A H27C 0.9600 . ?
C28A H28A 0.9600 . ?
C28A H28B 0.9600 . ?
C28A H28C 0.9600 . ?
C29A H29A 0.9600 . ?
C29A H29B 0.9600 . ?
C29A H29C 0.9600 . ?
N31A C30A 1.310(3) . ?
N31A C32A 1.471(3) . ?
N32A C30A 1.340(3) . ?
N32A C35A 1.466(3) . ?
C30A C31A 1.512(3) . ?
C31A H31A 0.9600 . ?
C31A H31B 0.9600 . ?
C31A H31C 0.9600 . ?
C32A C33A 1.518(4) . ?
C32A C34A 1.529(4) . ?
C32A H32A 0.9800 . ?
C33A H33A 0.9600 . ?
C33A H33B 0.9600 . ?
C33A H33C 0.9600 . ?
C34A H34A 0.9600 . ?
C34A H34B 0.9600 . ?
C34A H34C 0.9600 . ?
C35A C36A 1.521(4) . ?
C35A C37A 1.540(3) . ?
C35A H35A 0.9800 . ?
C36A H36A 0.9600 . ?
C36A H36B 0.9600 . ?
C36A H36C 0.9600 . ?
C37A H37A 0.9600 . ?
C37A H37B 0.9600 . ?
C37A H37C 0.9600 . ?
C40A C41A 1.412(4) . ?
C40A C44A 1.415(4) . ?
C40A C45A 1.506(4) . ?
C41A C42A 1.415(4) . ?
C41A C46A 1.502(4) . ?
C42A C43A 1.401(3) . ?
C42A C47A 1.503(4) . ?
C43A C44A 1.422(4) . ?
C43A C48A 1.504(4) . ?
C44A C49A 1.504(4) . ?
C45A H45A 0.9600 . ?
C45A H45B 0.9600 . ?
C45A H45C 0.9600 . ?
C46A H46A 0.9600 . ?
C46A H46B 0.9600 . ?
C46A H46C 0.9600 . ?
C47A H47A 0.9600 . ?
C47A H47B 0.9600 . ?
C47A H47C 0.9600 . ?
C48A H48A 0.9600 . ?
C48A H48B 0.9600 . ?
C48A H48C 0.9600 . ?
C49A H49A 0.9600 . ?
C49A H49B 0.9600 . ?
C49A H49C 0.9600 . ?
Nb1B N1B 1.8857(18) . ?
Nb1B N2B 1.9153(18) . ?
Nb1B N12B 2.1895(18) . ?
Nb1B N11B 2.4114(18) . ?
Nb1B C24B 2.463(2) . ?
Nb1B C20B 2.521(2) . ?
Nb1B C23B 2.535(2) . ?
Nb1B C21B 2.602(2) . ?
Nb1B C22B 2.612(2) . ?
Nb1B Nb2B 2.8159(4) . ?
Nb2B N2B 1.8857(18) . ?
Nb2B N1B 1.9198(18) . ?
Nb2B N32B 2.1815(18) . ?
Nb2B N31B 2.3672(18) . ?
Nb2B C44B 2.461(2) . ?
Nb2B C43B 2.523(2) . ?
Nb2B C40B 2.537(2) . ?
Nb2B C41B 2.601(2) . ?
Nb2B C42B 2.609(2) . ?
N11B C10B 1.315(3) . ?
N11B C12B 1.469(3) . ?
N12B C10B 1.335(3) . ?
N12B C15B 1.468(3) . ?
C10B C11B 1.512(3) . ?
C11B H11D 0.9600 . ?
C11B H11E 0.9600 . ?
C11B H11F 0.9600 . ?
C12B C13B 1.522(3) . ?
C12B C14B 1.527(3) . ?
C12B H12B 0.9800 . ?
C13B H13D 0.9600 . ?
C13B H13E 0.9600 . ?
C13B H13F 0.9600 . ?
C14B H14D 0.9600 . ?
C14B H14E 0.9600 . ?
C14B H14F 0.9600 . ?
C15B C16B 1.517(4) . ?
C15B C17B 1.532(4) . ?
C15B H15B 0.9800 . ?
C16B H16D 0.9600 . ?
C16B H16E 0.9600 . ?
C16B H16F 0.9600 . ?
C17B H17D 0.9600 . ?
C17B H17E 0.9600 . ?
C17B H17F 0.9600 . ?
C20B C21B 1.410(3) . ?
C20B C24B 1.419(3) . ?
C20B C25B 1.495(4) . ?
C21B C22B 1.420(4) . ?
C21B C26B 1.502(3) . ?
C22B C23B 1.399(4) . ?
C22B C27B 1.511(4) . ?
C23B C24B 1.405(4) . ?
C23B C28B 1.507(4) . ?
C24B C29B 1.516(4) . ?
C25B H25D 0.9600 . ?
C25B H25E 0.9600 . ?
C25B H25F 0.9600 . ?
C26B H26D 0.9600 . ?
C26B H26E 0.9600 . ?
C26B H26F 0.9600 . ?
C27B H27D 0.9600 . ?
C27B H27E 0.9600 . ?
C27B H27F 0.9600 . ?
C28B H28D 0.9600 . ?
C28B H28E 0.9600 . ?
C28B H28F 0.9600 . ?
C29B H29D 0.9600 . ?
C29B H29E 0.9600 . ?
C29B H29F 0.9600 . ?
N31B C30B 1.317(3) . ?
N31B C32B 1.472(3) . ?
N32B C30B 1.329(3) . ?
N32B C35B 1.468(3) . ?
C30B C31B 1.515(3) . ?
C31B H31D 0.9600 . ?
C31B H31E 0.9600 . ?
C31B H31F 0.9600 . ?
C32B C33B 1.514(4) . ?
C32B C34B 1.535(4) . ?
C32B H32B 0.9800 . ?
C33B H33D 0.9600 . ?
C33B H33E 0.9600 . ?
C33B H33F 0.9600 . ?
C34B H34D 0.9600 . ?
C34B H34E 0.9600 . ?
C34B H34F 0.9600 . ?
C35B C36B 1.522(4) . ?
C35B C37B 1.536(4) . ?
C35B H35B 0.9800 . ?
C36B H36D 0.9600 . ?
C36B H36E 0.9600 . ?
C36B H36F 0.9600 . ?
C37B H37D 0.9600 . ?
C37B H37E 0.9600 . ?
C37B H37F 0.9600 . ?
C40B C44B 1.414(4) . ?
C40B C41B 1.414(4) . ?
C40B C45B 1.505(4) . ?
C41B C42B 1.406(4) . ?
C41B C46B 1.503(4) . ?
C42B C43B 1.405(4) . ?
C42B C47B 1.500(4) . ?
C43B C44B 1.413(4) . ?
C43B C48B 1.503(4) . ?
C44B C49B 1.502(4) . ?
C45B H45D 0.9600 . ?
C45B H45E 0.9600 . ?
C45B H45F 0.9600 . ?
C46B H46D 0.9600 . ?
C46B H46E 0.9600 . ?
C46B H46F 0.9600 . ?
C47B H47D 0.9600 . ?
C47B H47E 0.9600 . ?
C47B H47F 0.9600 . ?
C48B H48D 0.9600 . ?
C48B H48E 0.9600 . ?
C48B H48F 0.9600 . ?
C49B H49D 0.9600 . ?
C49B H49E 0.9600 . ?
C49B H49F 0.9600 . ?

loop_
 _geom_angle_atom_site_label_1
 _geom_angle_atom_site_label_2
 _geom_angle_atom_site_label_3
 _geom_angle
 _geom_angle_site_symmetry_1
 _geom_angle_site_symmetry_3
 _geom_angle_publ_flag
N1A Nb1A N2A 84.38(8) . . ?
N1A Nb1A N12A 122.32(8) . . ?
N2A Nb1A N12A 88.97(7) . . ?
N1A Nb1A N11A 89.45(7) . . ?
N2A Nb1A N11A 135.05(7) . . ?
N12A Nb1A N11A 57.60(7) . . ?
N1A Nb1A C24A 99.25(8) . . ?
N2A Nb1A C24A 110.02(8) . . ?
N12A Nb1A C24A 136.15(7) . . ?
N11A Nb1A C24A 114.92(7) . . ?
N1A Nb1A C23A 120.45(8) . . ?
N2A Nb1A C23A 85.98(8) . . ?
N12A Nb1A C23A 116.07(8) . . ?
N11A Nb1A C23A 133.62(7) . . ?
C24A Nb1A C23A 33.22(8) . . ?
N1A Nb1A C20A 110.42(8) . . ?
N2A Nb1A C20A 139.62(8) . . ?
N12A Nb1A C20A 111.03(7) . . ?
N11A Nb1A C20A 83.93(7) . . ?
C24A Nb1A C20A 32.68(7) . . ?
C23A Nb1A C20A 53.90(8) . . ?
N1A Nb1A C22A 151.66(8) . . ?
N2A Nb1A C22A 96.32(8) . . ?
N12A Nb1A C22A 86.01(7) . . ?
N11A Nb1A C22A 108.91(7) . . ?
C24A Nb1A C22A 53.79(8) . . ?
C23A Nb1A C22A 32.03(7) . . ?
C20A Nb1A C22A 52.94(8) . . ?
N1A Nb1A C21A 141.63(8) . . ?
N2A Nb1A C21A 127.63(8) . . ?
N12A Nb1A C21A 83.21(7) . . ?
N11A Nb1A C21A 81.08(7) . . ?
C24A Nb1A C21A 53.64(7) . . ?
C23A Nb1A C21A 53.17(7) . . ?
C20A Nb1A C21A 31.91(7) . . ?
C22A Nb1A C21A 31.67(7) . . ?
N1A Nb1A Nb2A 42.66(6) . . ?
N2A Nb1A Nb2A 41.94(5) . . ?
N12A Nb1A Nb2A 107.25(5) . . ?
N11A Nb1A Nb2A 115.65(5) . . ?
C24A Nb1A Nb2A 113.19(5) . . ?
C23A Nb1A Nb2A 109.94(6) . . ?
C20A Nb1A Nb2A 141.65(5) . . ?
C22A Nb1A Nb2A 133.72(6) . . ?
C21A Nb1A Nb2A 163.11(5) . . ?
N2A Nb2A N1A 84.73(8) . . ?
N2A Nb2A N32A 117.31(8) . . ?
N1A Nb2A N32A 91.67(8) . . ?
N2A Nb2A N31A 86.51(7) . . ?
N1A Nb2A N31A 137.84(7) . . ?
N32A Nb2A N31A 56.81(7) . . ?
N2A Nb2A C44A 104.58(8) . . ?
N1A Nb2A C44A 103.84(9) . . ?
N32A Nb2A C44A 136.49(8) . . ?
N31A Nb2A C44A 118.27(8) . . ?
N2A Nb2A C40A 110.16(8) . . ?
N1A Nb2A C40A 135.79(8) . . ?
N32A Nb2A C40A 114.72(8) . . ?
N31A Nb2A C40A 85.73(8) . . ?
C44A Nb2A C40A 33.03(8) . . ?
N2A Nb2A C43A 128.95(8) . . ?
N1A Nb2A C43A 84.10(8) . . ?
N32A Nb2A C43A 112.67(8) . . ?
N31A Nb2A C43A 131.32(7) . . ?
C44A Nb2A C43A 32.77(8) . . ?
C40A Nb2A C43A 53.73(8) . . ?
N2A Nb2A C41A 139.51(8) . . ?
N1A Nb2A C41A 130.23(8) . . ?
N32A Nb2A C41A 85.45(8) . . ?
N31A Nb2A C41A 78.86(7) . . ?
C44A Nb2A C41A 53.47(8) . . ?
C40A Nb2A C41A 31.95(8) . . ?
C43A Nb2A C41A 52.46(8) . . ?
N2A Nb2A C42A 157.50(8) . . ?
N1A Nb2A C42A 98.95(8) . . ?
N32A Nb2A C42A 84.90(8) . . ?
N31A Nb2A C42A 104.52(7) . . ?
C44A Nb2A C42A 52.94(8) . . ?
C40A Nb2A C42A 52.60(8) . . ?
C43A Nb2A C42A 31.19(8) . . ?
C41A Nb2A C42A 31.28(8) . . ?
N2A Nb2A Nb1A 42.76(5) . . ?
N1A Nb2A Nb1A 42.18(5) . . ?
N32A Nb2A Nb1A 106.03(5) . . ?
N31A Nb2A Nb1A 115.10(5) . . ?
C44A Nb2A Nb1A 112.75(6) . . ?
C40A Nb2A Nb1A 139.09(6) . . ?
C43A Nb2A Nb1A 113.38(6) . . ?
C41A Nb2A Nb1A 165.20(6) . . ?
C42A Nb2A Nb1A 138.44(6) . . ?
Nb1A N1A Nb2A 95.16(8) . . ?
Nb2A N2A Nb1A 95.30(8) . . ?
C10A N11A C12A 121.49(19) . . ?
C10A N11A Nb1A 92.70(14) . . ?
C12A N11A Nb1A 143.40(15) . . ?
C10A N12A C15A 126.63(19) . . ?
C10A N12A Nb1A 97.80(14) . . ?
C15A N12A Nb1A 133.87(15) . . ?
N11A C10A N12A 111.16(19) . . ?
N11A C10A C11A 123.9(2) . . ?
N12A C10A C11A 124.9(2) . . ?
C10A C11A H11A 109.5 . . ?
C10A C11A H11B 109.5 . . ?
H11A C11A H11B 109.5 . . ?
C10A C11A H11C 109.5 . . ?
H11A C11A H11C 109.5 . . ?
H11B C11A H11C 109.5 . . ?
N11A C12A C13A 110.47(19) . . ?
N11A C12A C14A 112.2(2) . . ?
C13A C12A C14A 111.9(2) . . ?
N11A C12A H12A 107.3 . . ?
C13A C12A H12A 107.3 . . ?
C14A C12A H12A 107.3 . . ?
C12A C13A H13A 109.5 . . ?
C12A C13A H13B 109.5 . . ?
H13A C13A H13B 109.5 . . ?
C12A C13A H13C 109.5 . . ?
H13A C13A H13C 109.5 . . ?
H13B C13A H13C 109.5 . . ?
C12A C14A H14A 109.5 . . ?
C12A C14A H14B 109.5 . . ?
H14A C14A H14B 109.5 . . ?
C12A C14A H14C 109.5 . . ?
H14A C14A H14C 109.5 . . ?
H14B C14A H14C 109.5 . . ?
N12A C15A C16A 113.3(2) . . ?
N12A C15A C17A 114.2(2) . . ?
C16A C15A C17A 111.7(2) . . ?
N12A C15A H15A 105.6 . . ?
C16A C15A H15A 105.6 . . ?
C17A C15A H15A 105.6 . . ?
C15A C16A H16A 109.5 . . ?
C15A C16A H16B 109.5 . . ?
H16A C16A H16B 109.5 . . ?
C15A C16A H16C 109.5 . . ?
H16A C16A H16C 109.5 . . ?
H16B C16A H16C 109.5 . . ?
C15A C17A H17A 109.5 . . ?
C15A C17A H17B 109.5 . . ?
H17A C17A H17B 109.5 . . ?
C15A C17A H17C 109.5 . . ?
H17A C17A H17C 109.5 . . ?
H17B C17A H17C 109.5 . . ?
C24A C20A C21A 108.0(2) . . ?
C24A C20A C25A 123.4(2) . . ?
C21A C20A C25A 128.1(2) . . ?
C24A C20A Nb1A 70.30(12) . . ?
C21A C20A Nb1A 76.15(12) . . ?
C25A C20A Nb1A 125.63(16) . . ?
C22A C21A C20A 107.8(2) . . ?
C22A C21A C26A 125.3(2) . . ?
C20A C21A C26A 126.9(2) . . ?
C22A C21A Nb1A 73.50(12) . . ?
C20A C21A Nb1A 71.94(11) . . ?
C26A C21A Nb1A 122.39(15) . . ?
C23A C22A C21A 108.3(2) . . ?
C23A C22A C27A 124.8(2) . . ?
C21A C22A C27A 126.9(2) . . ?
C23A C22A Nb1A 70.78(12) . . ?
C21A C22A Nb1A 74.83(12) . . ?
C27A C22A Nb1A 121.99(17) . . ?
C22A C23A C24A 108.0(2) . . ?
C22A C23A C28A 123.6(2) . . ?
C24A C23A C28A 128.0(2) . . ?
C22A C23A Nb1A 77.20(13) . . ?
C24A C23A Nb1A 71.79(12) . . ?
C28A C23A Nb1A 123.04(17) . . ?
C20A C24A C23A 107.9(2) . . ?
C20A C24A C29A 123.2(2) . . ?
C23A C24A C29A 127.8(2) . . ?
C20A C24A Nb1A 77.02(12) . . ?
C23A C24A Nb1A 74.99(13) . . ?
C29A C24A Nb1A 123.83(16) . . ?
C20A C25A H25A 109.5 . . ?
C20A C25A H25B 109.5 . . ?
H25A C25A H25B 109.5 . . ?
C20A C25A H25C 109.5 . . ?
H25A C25A H25C 109.5 . . ?
H25B C25A H25C 109.5 . . ?
C21A C26A H26A 109.5 . . ?
C21A C26A H26B 109.5 . . ?
H26A C26A H26B 109.5 . . ?
C21A C26A H26C 109.5 . . ?
H26A C26A H26C 109.5 . . ?
H26B C26A H26C 109.5 . . ?
C22A C27A H27A 109.5 . . ?
C22A C27A H27B 109.5 . . ?
H27A C27A H27B 109.5 . . ?
C22A C27A H27C 109.5 . . ?
H27A C27A H27C 109.5 . . ?
H27B C27A H27C 109.5 . . ?
C23A C28A H28A 109.5 . . ?
C23A C28A H28B 109.5 . . ?
H28A C28A H28B 109.5 . . ?
C23A C28A H28C 109.5 . . ?
H28A C28A H28C 109.5 . . ?
H28B C28A H28C 109.5 . . ?
C24A C29A H29A 109.5 . . ?
C24A C29A H29B 109.5 . . ?
H29A C29A H29B 109.5 . . ?
C24A C29A H29C 109.5 . . ?
H29A C29A H29C 109.5 . . ?
H29B C29A H29C 109.5 . . ?
C30A N31A C32A 120.4(2) . . ?
C30A N31A Nb2A 89.98(13) . . ?
C32A N31A Nb2A 145.92(15) . . ?
C30A N32A C35A 126.4(2) . . ?
C30A N32A Nb2A 100.21(14) . . ?
C35A N32A Nb2A 132.15(15) . . ?
N31A C30A N32A 112.1(2) . . ?
N31A C30A C31A 123.4(2) . . ?
N32A C30A C31A 124.5(2) . . ?
C30A C31A H31A 109.5 . . ?
C30A C31A H31B 109.5 . . ?
H31A C31A H31B 109.5 . . ?
C30A C31A H31C 109.5 . . ?
H31A C31A H31C 109.5 . . ?
H31B C31A H31C 109.5 . . ?
N31A C32A C33A 110.5(2) . . ?
N31A C32A C34A 112.1(2) . . ?
C33A C32A C34A 111.4(2) . . ?
N31A C32A H32A 107.6 . . ?
C33A C32A H32A 107.6 . . ?
C34A C32A H32A 107.6 . . ?
C32A C33A H33A 109.5 . . ?
C32A C33A H33B 109.5 . . ?
H33A C33A H33B 109.5 . . ?
C32A C33A H33C 109.5 . . ?
H33A C33A H33C 109.5 . . ?
H33B C33A H33C 109.5 . . ?
C32A C34A H34A 109.5 . . ?
C32A C34A H34B 109.5 . . ?
H34A C34A H34B 109.5 . . ?
C32A C34A H34C 109.5 . . ?
H34A C34A H34C 109.5 . . ?
H34B C34A H34C 109.5 . . ?
N32A C35A C36A 113.1(2) . . ?
N32A C35A C37A 114.24(19) . . ?
C36A C35A C37A 111.5(2) . . ?
N32A C35A H35A 105.7 . . ?
C36A C35A H35A 105.7 . . ?
C37A C35A H35A 105.7 . . ?
C35A C36A H36A 109.5 . . ?
C35A C36A H36B 109.5 . . ?
H36A C36A H36B 109.5 . . ?
C35A C36A H36C 109.5 . . ?
H36A C36A H36C 109.5 . . ?
H36B C36A H36C 109.5 . . ?
C35A C37A H37A 109.5 . . ?
C35A C37A H37B 109.5 . . ?
H37A C37A H37B 109.5 . . ?
C35A C37A H37C 109.5 . . ?
H37A C37A H37C 109.5 . . ?
H37B C37A H37C 109.5 . . ?
C41A C40A C44A 107.9(2) . . ?
C41A C40A C45A 127.5(3) . . ?
C44A C40A C45A 124.4(3) . . ?
C41A C40A Nb2A 77.76(13) . . ?
C44A C40A Nb2A 71.70(13) . . ?
C45A C40A Nb2A 120.46(17) . . ?
C40A C41A C42A 107.9(2) . . ?
C40A C41A C46A 127.6(3) . . ?
C42A C41A C46A 124.4(3) . . ?
C40A C41A Nb2A 70.29(13) . . ?
C42A C41A Nb2A 75.70(13) . . ?
C46A C41A Nb2A 123.24(17) . . ?
C43A C42A C41A 108.5(2) . . ?
C43A C42A C47A 125.1(3) . . ?
C41A C42A C47A 126.2(3) . . ?
C43A C42A Nb2A 71.34(13) . . ?
C41A C42A Nb2A 73.02(13) . . ?
C47A C42A Nb2A 125.21(18) . . ?
C42A C43A C44A 107.8(2) . . ?
C42A C43A C48A 125.1(3) . . ?
C44A C43A C48A 127.0(3) . . ?
C42A C43A Nb2A 77.47(14) . . ?
C44A C43A Nb2A 69.81(13) . . ?
C48A C43A Nb2A 121.70(17) . . ?
C40A C44A C43A 107.9(2) . . ?
C40A C44A C49A 124.6(3) . . ?
C43A C44A C49A 125.5(3) . . ?
C40A C44A Nb2A 75.27(14) . . ?
C43A C44A Nb2A 77.42(14) . . ?
C49A C44A Nb2A 126.24(17) . . ?
C40A C45A H45A 109.5 . . ?
C40A C45A H45B 109.5 . . ?
H45A C45A H45B 109.5 . . ?
C40A C45A H45C 109.5 . . ?
H45A C45A H45C 109.5 . . ?
H45B C45A H45C 109.5 . . ?
C41A C46A H46A 109.5 . . ?
C41A C46A H46B 109.5 . . ?
H46A C46A H46B 109.5 . . ?
C41A C46A H46C 109.5 . . ?
H46A C46A H46C 109.5 . . ?
H46B C46A H46C 109.5 . . ?
C42A C47A H47A 109.5 . . ?
C42A C47A H47B 109.5 . . ?
H47A C47A H47B 109.5 . . ?
C42A C47A H47C 109.5 . . ?
H47A C47A H47C 109.5 . . ?
H47B C47A H47C 109.5 . . ?
C43A C48A H48A 109.5 . . ?
C43A C48A H48B 109.5 . . ?
H48A C48A H48B 109.5 . . ?
C43A C48A H48C 109.5 . . ?
H48A C48A H48C 109.5 . . ?
H48B C48A H48C 109.5 . . ?
C44A C49A H49A 109.5 . . ?
C44A C49A H49B 109.5 . . ?
H49A C49A H49B 109.5 . . ?
C44A C49A H49C 109.5 . . ?
H49A C49A H49C 109.5 . . ?
H49B C49A H49C 109.5 . . ?
N1B Nb1B N2B 84.35(8) . . ?
N1B Nb1B N12B 119.73(8) . . ?
N2B Nb1B N12B 90.76(8) . . ?
N1B Nb1B N11B 88.53(7) . . ?
N2B Nb1B N11B 136.76(7) . . ?
N12B Nb1B N11B 56.68(7) . . ?
N1B Nb1B C24B 101.91(9) . . ?
N2B Nb1B C24B 105.67(9) . . ?
N12B Nb1B C24B 136.65(8) . . ?
N11B Nb1B C24B 117.52(8) . . ?
N1B Nb1B C20B 110.95(8) . . ?
N2B Nb1B C20B 136.63(8) . . ?
N12B Nb1B C20B 112.87(7) . . ?
N11B Nb1B C20B 85.48(7) . . ?
C24B Nb1B C20B 33.07(8) . . ?
N1B Nb1B C23B 123.92(9) . . ?
N2B Nb1B C23B 83.65(8) . . ?
N12B Nb1B C23B 115.00(9) . . ?
N11B Nb1B C23B 133.45(7) . . ?
C24B Nb1B C23B 32.62(9) . . ?
C20B Nb1B C23B 53.78(8) . . ?
N1B Nb1B C21B 141.59(8) . . ?
N2B Nb1B C21B 127.60(8) . . ?
N12B Nb1B C21B 84.49(8) . . ?
N11B Nb1B C21B 80.80(7) . . ?
C24B Nb1B C21B 53.56(8) . . ?
C20B Nb1B C21B 31.90(8) . . ?
C23B Nb1B C21B 52.83(8) . . ?
N1B Nb1B C22B 154.26(9) . . ?
N2B Nb1B C22B 96.06(9) . . ?
N12B Nb1B C22B 86.01(8) . . ?
N11B Nb1B C22B 107.74(8) . . ?
C24B Nb1B C22B 53.09(9) . . ?
C20B Nb1B C22B 52.80(9) . . ?
C23B Nb1B C22B 31.50(9) . . ?
C21B Nb1B C22B 31.61(8) . . ?
N1B Nb1B Nb2B 42.74(5) . . ?
N2B Nb1B Nb2B 41.79(5) . . ?
N12B Nb1B Nb2B 107.04(5) . . ?
N11B Nb1B Nb2B 116.20(4) . . ?
C24B Nb1B Nb2B 111.88(6) . . ?
C20B Nb1B Nb2B 140.06(6) . . ?
C23B Nb1B Nb2B 109.96(6) . . ?
C21B Nb1B Nb2B 162.72(6) . . ?
C22B Nb1B Nb2B 134.15(7) . . ?
N2B Nb2B N1B 84.23(8) . . ?
N2B Nb2B N32B 118.98(8) . . ?
N1B Nb2B N32B 90.54(8) . . ?
N2B Nb2B N31B 87.85(7) . . ?
N1B Nb2B N31B 137.23(7) . . ?
N32B Nb2B N31B 57.47(7) . . ?
N2B Nb2B C44B 103.01(9) . . ?
N1B Nb2B C44B 108.51(8) . . ?
N32B Nb2B C44B 135.54(8) . . ?
N31B Nb2B C44B 114.23(8) . . ?
N2B Nb2B C43B 124.58(9) . . ?
N1B Nb2B C43B 85.32(8) . . ?
N32B Nb2B C43B 115.38(9) . . ?
N31B Nb2B C43B 131.92(7) . . ?
C44B Nb2B C43B 32.90(8) . . ?
N2B Nb2B C40B 112.75(9) . . ?
N1B Nb2B C40B 138.53(8) . . ?
N32B Nb2B C40B 110.55(8) . . ?
N31B Nb2B C40B 82.87(7) . . ?
C44B Nb2B C40B 32.82(8) . . ?
C43B Nb2B C40B 53.59(8) . . ?
N2B Nb2B C41B 143.38(9) . . ?
N1B Nb2B C41B 127.39(8) . . ?
N32B Nb2B C41B 82.68(8) . . ?
N31B Nb2B C41B 79.74(7) . . ?
C44B Nb2B C41B 53.64(8) . . ?
C43B Nb2B C41B 52.77(8) . . ?
C40B Nb2B C41B 31.92(8) . . ?
N2B Nb2B C42B 155.43(9) . . ?
N1B Nb2B C42B 96.34(8) . . ?
N32B Nb2B C42B 85.59(8) . . ?
N31B Nb2B C42B 107.34(8) . . ?
C44B Nb2B C42B 53.42(8) . . ?
C43B Nb2B C42B 31.73(8) . . ?
C40B Nb2B C42B 52.58(8) . . ?
C41B Nb2B C42B 31.31(8) . . ?
N2B Nb2B Nb1B 42.60(6) . . ?
N1B Nb2B Nb1B 41.81(5) . . ?
N32B Nb2B Nb1B 106.42(5) . . ?
N31B Nb2B Nb1B 115.89(5) . . ?
C44B Nb2B Nb1B 114.57(6) . . ?
C43B Nb2B Nb1B 111.57(6) . . ?
C40B Nb2B Nb1B 142.94(6) . . ?
C41B Nb2B Nb1B 164.31(6) . . ?
C42B Nb2B Nb1B 134.81(6) . . ?
Nb1B N1B Nb2B 95.45(8) . . ?
Nb2B N2B Nb1B 95.60(8) . . ?
C10B N11B C12B 120.72(19) . . ?
C10B N11B Nb1B 90.45(13) . . ?
C12B N11B Nb1B 145.10(14) . . ?
C10B N12B C15B 126.6(2) . . ?
C10B N12B Nb1B 100.01(14) . . ?
C15B N12B Nb1B 131.10(15) . . ?
N11B C10B N12B 111.65(19) . . ?
N11B C10B C11B 123.8(2) . . ?
N12B C10B C11B 124.6(2) . . ?
C10B C11B H11D 109.5 . . ?
C10B C11B H11E 109.5 . . ?
H11D C11B H11E 109.5 . . ?
C10B C11B H11F 109.5 . . ?
H11D C11B H11F 109.5 . . ?
H11E C11B H11F 109.5 . . ?
N11B C12B C13B 110.1(2) . . ?
N11B C12B C14B 112.4(2) . . ?
C13B C12B C14B 110.6(2) . . ?
N11B C12B H12B 107.8 . . ?
C13B C12B H12B 107.8 . . ?
C14B C12B H12B 107.8 . . ?
C12B C13B H13D 109.5 . . ?
C12B C13B H13E 109.5 . . ?
H13D C13B H13E 109.5 . . ?
C12B C13B H13F 109.5 . . ?
H13D C13B H13F 109.5 . . ?
H13E C13B H13F 109.5 . . ?
C12B C14B H14D 109.5 . . ?
C12B C14B H14E 109.5 . . ?
H14D C14B H14E 109.5 . . ?
C12B C14B H14F 109.5 . . ?
H14D C14B H14F 109.5 . . ?
H14E C14B H14F 109.5 . . ?
N12B C15B C16B 112.6(2) . . ?
N12B C15B C17B 114.5(2) . . ?
C16B C15B C17B 111.8(2) . . ?
N12B C15B H15B 105.7 . . ?
C16B C15B H15B 105.7 . . ?
C17B C15B H15B 105.7 . . ?
C15B C16B H16D 109.5 . . ?
C15B C16B H16E 109.5 . . ?
H16D C16B H16E 109.5 . . ?
C15B C16B H16F 109.5 . . ?
H16D C16B H16F 109.5 . . ?
H16E C16B H16F 109.5 . . ?
C15B C17B H17D 109.5 . . ?
C15B C17B H17E 109.5 . . ?
H17D C17B H17E 109.5 . . ?
C15B C17B H17F 109.5 . . ?
H17D C17B H17F 109.5 . . ?
H17E C17B H17F 109.5 . . ?
C21B C20B C24B 107.7(2) . . ?
C21B C20B C25B 127.3(2) . . ?
C24B C20B C25B 124.5(3) . . ?
C21B C20B Nb1B 77.20(13) . . ?
C24B C20B Nb1B 71.21(13) . . ?
C25B C20B Nb1B 123.25(17) . . ?
C20B C21B C22B 107.6(2) . . ?
C20B C21B C26B 126.3(3) . . ?
C22B C21B C26B 126.0(3) . . ?
C20B C21B Nb1B 70.89(12) . . ?
C22B C21B Nb1B 74.61(13) . . ?
C26B C21B Nb1B 123.04(17) . . ?
C23B C22B C21B 108.3(2) . . ?
C23B C22B C27B 124.9(3) . . ?
C21B C22B C27B 126.7(3) . . ?
C23B C22B Nb1B 71.18(14) . . ?
C21B C22B Nb1B 73.78(14) . . ?
C27B C22B Nb1B 122.85(19) . . ?
C22B C23B C24B 108.2(2) . . ?
C22B C23B C28B 124.2(3) . . ?
C24B C23B C28B 127.3(3) . . ?
C22B C23B Nb1B 77.31(15) . . ?
C24B C23B Nb1B 70.87(14) . . ?
C28B C23B Nb1B 122.32(18) . . ?
C23B C24B C20B 108.1(2) . . ?
C23B C24B C29B 127.7(3) . . ?
C20B C24B C29B 122.9(3) . . ?
C23B C24B Nb1B 76.51(15) . . ?
C20B C24B Nb1B 75.72(13) . . ?
C29B C24B Nb1B 124.16(17) . . ?
C20B C25B H25D 109.5 . . ?
C20B C25B H25E 109.5 . . ?
H25D C25B H25E 109.5 . . ?
C20B C25B H25F 109.5 . . ?
H25D C25B H25F 109.5 . . ?
H25E C25B H25F 109.5 . . ?
C21B C26B H26D 109.5 . . ?
C21B C26B H26E 109.5 . . ?
H26D C26B H26E 109.5 . . ?
C21B C26B H26F 109.5 . . ?
H26D C26B H26F 109.5 . . ?
H26E C26B H26F 109.5 . . ?
C22B C27B H27D 109.5 . . ?
C22B C27B H27E 109.5 . . ?
H27D C27B H27E 109.5 . . ?
C22B C27B H27F 109.5 . . ?
H27D C27B H27F 109.5 . . ?
H27E C27B H27F 109.5 . . ?
C23B C28B H28D 109.5 . . ?
C23B C28B H28E 109.5 . . ?
H28D C28B H28E 109.5 . . ?
C23B C28B H28F 109.5 . . ?
H28D C28B H28F 109.5 . . ?
H28E C28B H28F 109.5 . . ?
C24B C29B H29D 109.5 . . ?
C24B C29B H29E 109.5 . . ?
H29D C29B H29E 109.5 . . ?
C24B C29B H29F 109.5 . . ?
H29D C29B H29F 109.5 . . ?
H29E C29B H29F 109.5 . . ?
C30B N31B C32B 121.7(2) . . ?
C30B N31B Nb2B 90.82(14) . . ?
C32B N31B Nb2B 143.55(16) . . ?
C30B N32B C35B 128.0(2) . . ?
C30B N32B Nb2B 98.93(15) . . ?
C35B N32B Nb2B 131.97(16) . . ?
N31B C30B N32B 111.9(2) . . ?
N31B C30B C31B 123.7(2) . . ?
N32B C30B C31B 124.4(2) . . ?
C30B C31B H31D 109.5 . . ?
C30B C31B H31E 109.5 . . ?
H31D C31B H31E 109.5 . . ?
C30B C31B H31F 109.5 . . ?
H31D C31B H31F 109.5 . . ?
H31E C31B H31F 109.5 . . ?
N31B C32B C33B 110.7(2) . . ?
N31B C32B C34B 112.5(2) . . ?
C33B C32B C34B 111.2(3) . . ?
N31B C32B H32B 107.4 . . ?
C33B C32B H32B 107.4 . . ?
C34B C32B H32B 107.4 . . ?
C32B C33B H33D 109.5 . . ?
C32B C33B H33E 109.5 . . ?
H33D C33B H33E 109.5 . . ?
C32B C33B H33F 109.5 . . ?
H33D C33B H33F 109.5 . . ?
H33E C33B H33F 109.5 . . ?
C32B C34B H34D 109.5 . . ?
C32B C34B H34E 109.5 . . ?
H34D C34B H34E 109.5 . . ?
C32B C34B H34F 109.5 . . ?
H34D C34B H34F 109.5 . . ?
H34E C34B H34F 109.5 . . ?
N32B C35B C36B 113.2(2) . . ?
N32B C35B C37B 114.8(2) . . ?
C36B C35B C37B 111.6(2) . . ?
N32B C35B H35B 105.4 . . ?
C36B C35B H35B 105.4 . . ?
C37B C35B H35B 105.4 . . ?
C35B C36B H36D 109.5 . . ?
C35B C36B H36E 109.5 . . ?
H36D C36B H36E 109.5 . . ?
C35B C36B H36F 109.5 . . ?
H36D C36B H36F 109.5 . . ?
H36E C36B H36F 109.5 . . ?
C35B C37B H37D 109.5 . . ?
C35B C37B H37E 109.5 . . ?
H37D C37B H37E 109.5 . . ?
C35B C37B H37F 109.5 . . ?
H37D C37B H37F 109.5 . . ?
H37E C37B H37F 109.5 . . ?
C44B C40B C41B 107.9(2) . . ?
C44B C40B C45B 124.2(3) . . ?
C41B C40B C45B 127.2(3) . . ?
C44B C40B Nb2B 70.62(12) . . ?
C41B C40B Nb2B 76.52(13) . . ?
C45B C40B Nb2B 125.55(17) . . ?
C42B C41B C40B 107.9(2) . . ?
C42B C41B C46B 125.4(3) . . ?
C40B C41B C46B 126.6(3) . . ?
C42B C41B Nb2B 74.65(13) . . ?
C40B C41B Nb2B 71.56(13) . . ?
C46B C41B Nb2B 122.60(17) . . ?
C43B C42B C41B 108.3(2) . . ?
C43B C42B C47B 124.4(3) . . ?
C41B C42B C47B 127.3(3) . . ?
C43B C42B Nb2B 70.78(13) . . ?
C41B C42B Nb2B 74.04(13) . . ?
C47B C42B Nb2B 122.94(17) . . ?
C42B C43B C44B 108.2(2) . . ?
C42B C43B C48B 123.6(3) . . ?
C44B C43B C48B 127.9(3) . . ?
C42B C43B Nb2B 77.50(14) . . ?
C44B C43B Nb2B 71.13(13) . . ?
C48B C43B Nb2B 122.09(17) . . ?
C43B C44B C40B 107.6(2) . . ?
C43B C44B C49B 126.7(3) . . ?
C40B C44B C49B 124.3(3) . . ?
C43B C44B Nb2B 75.97(13) . . ?
C40B C44B Nb2B 76.55(13) . . ?
C49B C44B Nb2B 124.36(17) . . ?
C40B C45B H45D 109.5 . . ?
C40B C45B H45E 109.5 . . ?
H45D C45B H45E 109.5 . . ?
C40B C45B H45F 109.5 . . ?
H45D C45B H45F 109.5 . . ?
H45E C45B H45F 109.5 . . ?
C41B C46B H46D 109.5 . . ?
C41B C46B H46E 109.5 . . ?
H46D C46B H46E 109.5 . . ?
C41B C46B H46F 109.5 . . ?
H46D C46B H46F 109.5 . . ?
H46E C46B H46F 109.5 . . ?
C42B C47B H47D 109.5 . . ?
C42B C47B H47E 109.5 . . ?
H47D C47B H47E 109.5 . . ?
C42B C47B H47F 109.5 . . ?
H47D C47B H47F 109.5 . . ?
H47E C47B H47F 109.5 . . ?
C43B C48B H48D 109.5 . . ?
C43B C48B H48E 109.5 . . ?
H48D C48B H48E 109.5 . . ?
C43B C48B H48F 109.5 . . ?
H48D C48B H48F 109.5 . . ?
H48E C48B H48F 109.5 . . ?
C44B C49B H49D 109.5 . . ?
C44B C49B H49E 109.5 . . ?
H49D C49B H49E 109.5 . . ?
C44B C49B H49F 109.5 . . ?
H49D C49B H49F 109.5 . . ?
H49E C49B H49F 109.5 . . ?

loop_
 _geom_torsion_atom_site_label_1
 _geom_torsion_atom_site_label_2
 _geom_torsion_atom_site_label_3
 _geom_torsion_atom_site_label_4
 _geom_torsion
 _geom_torsion_site_symmetry_1
 _geom_torsion_site_symmetry_2
 _geom_torsion_site_symmetry_3
 _geom_torsion_site_symmetry_4
 _geom_torsion_publ_flag
N1A Nb1A Nb2A N2A 172.67(12) . . . . ?
N12A Nb1A Nb2A N2A -68.05(10) . . . . ?
N11A Nb1A Nb2A N2A -129.80(10) . . . . ?
C24A Nb1A Nb2A N2A 94.61(11) . . . . ?
C23A Nb1A Nb2A N2A 58.98(11) . . . . ?
C20A Nb1A Nb2A N2A 115.49(12) . . . . ?
C22A Nb1A Nb2A N2A 33.26(11) . . . . ?
C21A Nb1A Nb2A N2A 58.6(2) . . . . ?
N2A Nb1A Nb2A N1A -172.67(12) . . . . ?
N12A Nb1A Nb2A N1A 119.28(10) . . . . ?
N11A Nb1A Nb2A N1A 57.52(10) . . . . ?
C24A Nb1A Nb2A N1A -78.06(11) . . . . ?
C23A Nb1A Nb2A N1A -113.70(11) . . . . ?
C20A Nb1A Nb2A N1A -57.18(12) . . . . ?
C22A Nb1A Nb2A N1A -139.41(11) . . . . ?
C21A Nb1A Nb2A N1A -114.1(2) . . . . ?
N1A Nb1A Nb2A N32A -74.22(10) . . . . ?
N2A Nb1A Nb2A N32A 113.10(10) . . . . ?
N12A Nb1A Nb2A N32A 45.06(7) . . . . ?
N11A Nb1A Nb2A N32A -16.70(7) . . . . ?
C24A Nb1A Nb2A N32A -152.29(8) . . . . ?
C23A Nb1A Nb2A N32A 172.08(8) . . . . ?
C20A Nb1A Nb2A N32A -131.41(10) . . . . ?
C22A Nb1A Nb2A N32A 146.36(9) . . . . ?
C21A Nb1A Nb2A N32A 171.71(19) . . . . ?
N1A Nb1A Nb2A N31A -134.60(10) . . . . ?
N2A Nb1A Nb2A N31A 52.73(10) . . . . ?
N12A Nb1A Nb2A N31A -15.32(7) . . . . ?
N11A Nb1A Nb2A N31A -77.08(7) . . . . ?
C24A Nb1A Nb2A N31A 147.34(8) . . . . ?
C23A Nb1A Nb2A N31A 111.70(8) . . . . ?
C20A Nb1A Nb2A N31A 168.22(10) . . . . ?
C22A Nb1A Nb2A N31A 85.99(9) . . . . ?
C21A Nb1A Nb2A N31A 111.33(19) . . . . ?
N1A Nb1A Nb2A C44A 85.61(11) . . . . ?
N2A Nb1A Nb2A C44A -87.06(11) . . . . ?
N12A Nb1A Nb2A C44A -155.11(9) . . . . ?
N11A Nb1A Nb2A C44A 143.14(9) . . . . ?
C24A Nb1A Nb2A C44A 7.55(9) . . . . ?
C23A Nb1A Nb2A C44A -28.08(9) . . . . ?
C20A Nb1A Nb2A C44A 28.43(11) . . . . ?
C22A Nb1A Nb2A C44A -53.80(10) . . . . ?
C21A Nb1A Nb2A C44A -28.5(2) . . . . ?
N1A Nb1A Nb2A C40A 110.88(13) . . . . ?
N2A Nb1A Nb2A C40A -61.79(13) . . . . ?
N12A Nb1A Nb2A C40A -129.83(11) . . . . ?
N11A Nb1A Nb2A C40A 168.41(10) . . . . ?
C24A Nb1A Nb2A C40A 32.82(11) . . . . ?
C23A Nb1A Nb2A C40A -2.81(11) . . . . ?
C20A Nb1A Nb2A C40A 53.70(13) . . . . ?
C22A Nb1A Nb2A C40A -28.53(12) . . . . ?
C21A Nb1A Nb2A C40A -3.2(2) . . . . ?
N1A Nb1A Nb2A C43A 49.91(11) . . . . ?
N2A Nb1A Nb2A C43A -122.77(11) . . . . ?
N12A Nb1A Nb2A C43A 169.19(8) . . . . ?
N11A Nb1A Nb2A C43A 107.43(8) . . . . ?
C24A Nb1A Nb2A C43A -28.15(9) . . . . ?
C23A Nb1A Nb2A C43A -63.79(9) . . . . ?
C20A Nb1A Nb2A C43A -7.28(11) . . . . ?
C22A Nb1A Nb2A C43A -89.51(10) . . . . ?
C21A Nb1A Nb2A C43A -64.16(19) . . . . ?
N1A Nb1A Nb2A C41A 65.7(3) . . . . ?
N2A Nb1A Nb2A C41A -107.0(3) . . . . ?
N12A Nb1A Nb2A C41A -175.0(2) . . . . ?
N11A Nb1A Nb2A C41A 123.2(2) . . . . ?
C24A Nb1A Nb2A C41A -12.4(3) . . . . ?
C23A Nb1A Nb2A C41A -48.0(3) . . . . ?
C20A Nb1A Nb2A C41A 8.5(3) . . . . ?
C22A Nb1A Nb2A C41A -73.7(3) . . . . ?
C21A Nb1A Nb2A C41A -48.4(3) . . . . ?
N1A Nb1A Nb2A C42A 26.42(12) . . . . ?
N2A Nb1A Nb2A C42A -146.25(12) . . . . ?
N12A Nb1A Nb2A C42A 145.70(10) . . . . ?
N11A Nb1A Nb2A C42A 83.95(10) . . . . ?
C24A Nb1A Nb2A C42A -51.64(11) . . . . ?
C23A Nb1A Nb2A C42A -87.27(11) . . . . ?
C20A Nb1A Nb2A C42A -30.76(12) . . . . ?
C22A Nb1A Nb2A C42A -112.99(11) . . . . ?
C21A Nb1A Nb2A C42A -87.6(2) . . . . ?
N2A Nb1A N1A Nb2A 4.91(8) . . . . ?
N12A Nb1A N1A Nb2A -80.29(10) . . . . ?
N11A Nb1A N1A Nb2A -130.49(8) . . . . ?
C24A Nb1A N1A Nb2A 114.33(8) . . . . ?
C23A Nb1A N1A Nb2A 86.89(10) . . . . ?
C20A Nb1A N1A Nb2A 146.19(7) . . . . ?
C22A Nb1A N1A Nb2A 97.83(17) . . . . ?
C21A Nb1A N1A Nb2A 154.70(9) . . . . ?
N2A Nb2A N1A Nb1A -4.99(8) . . . . ?
N32A Nb2A N1A Nb1A 112.28(8) . . . . ?
N31A Nb2A N1A Nb1A 73.88(12) . . . . ?
C44A Nb2A N1A Nb1A -108.74(9) . . . . ?
C40A Nb2A N1A Nb1A -118.66(10) . . . . ?
C43A Nb2A N1A Nb1A -135.10(9) . . . . ?
C41A Nb2A N1A Nb1A -162.25(8) . . . . ?
C42A Nb2A N1A Nb1A -162.61(8) . . . . ?
N1A Nb2A N2A Nb1A 4.93(8) . . . . ?
N32A Nb2A N2A Nb1A -84.23(9) . . . . ?
N31A Nb2A N2A Nb1A -133.78(8) . . . . ?
C44A Nb2A N2A Nb1A 107.89(9) . . . . ?
C40A Nb2A N2A Nb1A 142.07(8) . . . . ?
C43A Nb2A N2A Nb1A 82.97(11) . . . . ?
C41A Nb2A N2A Nb1A 157.91(9) . . . . ?
C42A Nb2A N2A Nb1A 105.6(2) . . . . ?
N1A Nb1A N2A Nb2A -4.98(8) . . . . ?
N12A Nb1A N2A Nb2A 117.64(8) . . . . ?
N11A Nb1A N2A Nb2A 78.58(11) . . . . ?
C24A Nb1A N2A Nb2A -102.80(8) . . . . ?
C23A Nb1A N2A Nb2A -126.14(9) . . . . ?
C20A Nb1A N2A Nb2A -120.16(10) . . . . ?
C22A Nb1A N2A Nb2A -156.49(8) . . . . ?
C21A Nb1A N2A Nb2A -161.75(7) . . . . ?
N1A Nb1A N11A C10A 124.48(14) . . . . ?
N2A Nb1A N11A C10A 43.00(17) . . . . ?
N12A Nb1A N11A C10A -5.26(12) . . . . ?
C24A Nb1A N11A C10A -135.57(13) . . . . ?
C23A Nb1A N11A C10A -101.82(15) . . . . ?
C20A Nb1A N11A C10A -124.92(14) . . . . ?
C22A Nb1A N11A C10A -77.53(14) . . . . ?
C21A Nb1A N11A C10A -92.85(14) . . . . ?
Nb2A Nb1A N11A C10A 89.61(13) . . . . ?
N1A Nb1A N11A C12A -35.7(2) . . . . ?
N2A Nb1A N11A C12A -117.2(2) . . . . ?
N12A Nb1A N11A C12A -165.4(3) . . . . ?
C24A Nb1A N11A C12A 64.3(3) . . . . ?
C23A Nb1A N11A C12A 98.0(2) . . . . ?
C20A Nb1A N11A C12A 74.9(2) . . . . ?
C22A Nb1A N11A C12A 122.3(2) . . . . ?
C21A Nb1A N11A C12A 107.0(2) . . . . ?
Nb2A Nb1A N11A C12A -70.5(2) . . . . ?
N1A Nb1A N12A C10A -60.23(15) . . . . ?
N2A Nb1A N12A C10A -142.93(14) . . . . ?
N11A Nb1A N12A C10A 5.25(12) . . . . ?
C24A Nb1A N12A C10A 98.68(16) . . . . ?
C23A Nb1A N12A C10A 132.06(13) . . . . ?
C20A Nb1A N12A C10A 73.04(14) . . . . ?
C22A Nb1A N12A C10A 120.66(14) . . . . ?
C21A Nb1A N12A C10A 88.97(14) . . . . ?
Nb2A Nb1A N12A C10A -104.61(12) . . . . ?
N1A Nb1A N12A C15A 105.0(2) . . . . ?
N2A Nb1A N12A C15A 22.3(2) . . . . ?
N11A Nb1A N12A C15A 170.5(2) . . . . ?
C24A Nb1A N12A C15A -96.1(2) . . . . ?
C23A Nb1A N12A C15A -62.7(2) . . . . ?
C20A Nb1A N12A C15A -121.7(2) . . . . ?
C22A Nb1A N12A C15A -74.1(2) . . . . ?
C21A Nb1A N12A C15A -105.8(2) . . . . ?
Nb2A Nb1A N12A C15A 60.6(2) . . . . ?
C12A N11A C10A N12A 174.17(19) . . . . ?
Nb1A N11A C10A N12A 7.91(18) . . . . ?
C12A N11A C10A C11A -5.6(3) . . . . ?
Nb1A N11A C10A C11A -171.9(2) . . . . ?
C15A N12A C10A N11A -175.2(2) . . . . ?
Nb1A N12A C10A N11A -8.41(19) . . . . ?
C15A N12A C10A C11A 4.6(4) . . . . ?
Nb1A N12A C10A C11A 171.4(2) . . . . ?
C10A N11A C12A C13A -147.8(2) . . . . ?
Nb1A N11A C12A C13A 8.8(3) . . . . ?
C10A N11A C12A C14A 86.6(3) . . . . ?
Nb1A N11A C12A C14A -116.8(2) . . . . ?
C10A N12A C15A C16A 64.5(3) . . . . ?
Nb1A N12A C15A C16A -97.1(3) . . . . ?
C10A N12A C15A C17A -64.8(3) . . . . ?
Nb1A N12A C15A C17A 133.5(2) . . . . ?
N1A Nb1A C20A C24A -74.78(15) . . . . ?
N2A Nb1A C20A C24A 31.28(19) . . . . ?
N12A Nb1A C20A C24A 146.26(13) . . . . ?
N11A Nb1A C20A C24A -161.92(14) . . . . ?
C23A Nb1A C20A C24A 38.66(14) . . . . ?
C22A Nb1A C20A C24A 78.83(15) . . . . ?
C21A Nb1A C20A C24A 115.2(2) . . . . ?
Nb2A Nb1A C20A C24A -37.36(18) . . . . ?
N1A Nb1A C20A C21A 170.00(13) . . . . ?
N2A Nb1A C20A C21A -83.95(17) . . . . ?
N12A Nb1A C20A C21A 31.03(15) . . . . ?
N11A Nb1A C20A C21A 82.86(14) . . . . ?
C24A Nb1A C20A C21A -115.2(2) . . . . ?
C23A Nb1A C20A C21A -76.56(15) . . . . ?
C22A Nb1A C20A C21A -36.40(13) . . . . ?
Nb2A Nb1A C20A C21A -152.58(11) . . . . ?
N1A Nb1A C20A C25A 42.8(2) . . . . ?
N2A Nb1A C20A C25A 148.85(19) . . . . ?
N12A Nb1A C20A C25A -96.2(2) . . . . ?
N11A Nb1A C20A C25A -44.3(2) . . . . ?
C24A Nb1A C20A C25A 117.6(3) . . . . ?
C23A Nb1A C20A C25A 156.2(2) . . . . ?
C22A Nb1A C20A C25A -163.6(2) . . . . ?
C21A Nb1A C20A C25A -127.2(3) . . . . ?
Nb2A Nb1A C20A C25A 80.2(2) . . . . ?
C24A C20A C21A C22A 1.7(2) . . . . ?
C25A C20A C21A C22A -170.1(2) . . . . ?
Nb1A C20A C21A C22A 65.26(15) . . . . ?
C24A C20A C21A C26A 179.1(2) . . . . ?
C25A C20A C21A C26A 7.3(4) . . . . ?
Nb1A C20A C21A C26A -117.4(2) . . . . ?
C24A C20A C21A Nb1A -63.57(14) . . . . ?
C25A C20A C21A Nb1A 124.7(2) . . . . ?
N1A Nb1A C21A C22A -130.79(15) . . . . ?
N2A Nb1A C21A C22A 9.98(17) . . . . ?
N12A Nb1A C21A C22A 93.40(14) . . . . ?
N11A Nb1A C21A C22A 151.56(14) . . . . ?
C24A Nb1A C21A C22A -78.25(15) . . . . ?
C23A Nb1A C21A C22A -36.54(13) . . . . ?
C20A Nb1A C21A C22A -115.6(2) . . . . ?
Nb2A Nb1A C21A C22A -36.1(3) . . . . ?
N1A Nb1A C21A C20A -15.2(2) . . . . ?
N2A Nb1A C21A C20A 125.57(14) . . . . ?
N12A Nb1A C21A C20A -151.01(14) . . . . ?
N11A Nb1A C21A C20A -92.85(14) . . . . ?
C24A Nb1A C21A C20A 37.34(13) . . . . ?
C23A Nb1A C21A C20A 79.05(15) . . . . ?
C22A Nb1A C21A C20A 115.6(2) . . . . ?
Nb2A Nb1A C21A C20A 79.5(2) . . . . ?
N1A Nb1A C21A C26A 107.5(2) . . . . ?
N2A Nb1A C21A C26A -111.7(2) . . . . ?
N12A Nb1A C21A C26A -28.3(2) . . . . ?
N11A Nb1A C21A C26A 29.9(2) . . . . ?
C24A Nb1A C21A C26A 160.0(2) . . . . ?
C23A Nb1A C21A C26A -158.2(2) . . . . ?
C20A Nb1A C21A C26A 122.7(3) . . . . ?
C22A Nb1A C21A C26A -121.7(3) . . . . ?
Nb2A Nb1A C21A C26A -157.81(15) . . . . ?
C20A C21A C22A C23A -0.9(2) . . . . ?
C26A C21A C22A C23A -178.3(2) . . . . ?
Nb1A C21A C22A C23A 63.33(15) . . . . ?
C20A C21A C22A C27A 176.9(2) . . . . ?
C26A C21A C22A C27A -0.5(4) . . . . ?
Nb1A C21A C22A C27A -118.9(2) . . . . ?
C20A C21A C22A Nb1A -64.23(14) . . . . ?
C26A C21A C22A Nb1A 118.3(2) . . . . ?
N1A Nb1A C22A C23A -18.0(2) . . . . ?
N2A Nb1A C22A C23A 71.92(15) . . . . ?
N12A Nb1A C22A C23A 160.44(15) . . . . ?
N11A Nb1A C22A C23A -145.83(14) . . . . ?
C24A Nb1A C22A C23A -38.30(14) . . . . ?
C20A Nb1A C22A C23A -79.33(15) . . . . ?
C21A Nb1A C22A C23A -116.0(2) . . . . ?
Nb2A Nb1A C22A C23A 50.28(17) . . . . ?
N1A Nb1A C22A C21A 98.1(2) . . . . ?
N2A Nb1A C22A C21A -172.06(14) . . . . ?
N12A Nb1A C22A C21A -83.54(14) . . . . ?
N11A Nb1A C22A C21A -29.82(15) . . . . ?
C24A Nb1A C22A C21A 77.71(14) . . . . ?
C23A Nb1A C22A C21A 116.0(2) . . . . ?
C20A Nb1A C22A C21A 36.69(13) . . . . ?
Nb2A Nb1A C22A C21A 166.30(10) . . . . ?
N1A Nb1A C22A C27A -137.6(2) . . . . ?
N2A Nb1A C22A C27A -47.7(2) . . . . ?
N12A Nb1A C22A C27A 40.8(2) . . . . ?
N11A Nb1A C22A C27A 94.5(2) . . . . ?
C24A Nb1A C22A C27A -157.9(3) . . . . ?
C23A Nb1A C22A C27A -119.6(3) . . . . ?
C20A Nb1A C22A C27A 161.0(3) . . . . ?
C21A Nb1A C22A C27A 124.4(3) . . . . ?
Nb2A Nb1A C22A C27A -69.3(2) . . . . ?
C21A C22A C23A C24A -0.2(2) . . . . ?
C27A C22A C23A C24A -178.1(2) . . . . ?
Nb1A C22A C23A C24A 65.75(15) . . . . ?
C21A C22A C23A C28A 172.7(2) . . . . ?
C27A C22A C23A C28A -5.2(4) . . . . ?
Nb1A C22A C23A C28A -121.3(2) . . . . ?
C21A C22A C23A Nb1A -65.98(15) . . . . ?
C27A C22A C23A Nb1A 116.2(2) . . . . ?
N1A Nb1A C23A C22A 170.22(14) . . . . ?
N2A Nb1A C23A C22A -108.70(15) . . . . ?
N12A Nb1A C23A C22A -21.83(17) . . . . ?
N11A Nb1A C23A C22A 47.21(18) . . . . ?
C24A Nb1A C23A C22A 114.1(2) . . . . ?
C20A Nb1A C23A C22A 76.09(15) . . . . ?
C21A Nb1A C23A C22A 36.12(13) . . . . ?
Nb2A Nb1A C23A C22A -143.74(13) . . . . ?
N1A Nb1A C23A C24A 56.13(16) . . . . ?
N2A Nb1A C23A C24A 137.21(14) . . . . ?
N12A Nb1A C23A C24A -135.91(13) . . . . ?
N11A Nb1A C23A C24A -66.87(16) . . . . ?
C20A Nb1A C23A C24A -38.00(13) . . . . ?
C22A Nb1A C23A C24A -114.1(2) . . . . ?
C21A Nb1A C23A C24A -77.97(14) . . . . ?
Nb2A Nb1A C23A C24A 102.17(13) . . . . ?
N1A Nb1A C23A C28A -67.9(2) . . . . ?
N2A Nb1A C23A C28A 13.2(2) . . . . ?
N12A Nb1A C23A C28A 100.1(2) . . . . ?
N11A Nb1A C23A C28A 169.11(19) . . . . ?
C24A Nb1A C23A C28A -124.0(3) . . . . ?
C20A Nb1A C23A C28A -162.0(3) . . . . ?
C22A Nb1A C23A C28A 121.9(3) . . . . ?
C21A Nb1A C23A C28A 158.0(3) . . . . ?
Nb2A Nb1A C23A C28A -21.8(2) . . . . ?
C21A C20A C24A C23A -1.8(2) . . . . ?
C25A C20A C24A C23A 170.4(2) . . . . ?
Nb1A C20A C24A C23A -69.28(15) . . . . ?
C21A C20A C24A C29A -170.4(2) . . . . ?
C25A C20A C24A C29A 1.8(3) . . . . ?
Nb1A C20A C24A C29A 122.1(2) . . . . ?
C21A C20A C24A Nb1A 67.44(15) . . . . ?
C25A C20A C24A Nb1A -120.3(2) . . . . ?
C22A C23A C24A C20A 1.3(2) . . . . ?
C28A C23A C24A C20A -171.2(2) . . . . ?
Nb1A C23A C24A C20A 70.67(15) . . . . ?
C22A C23A C24A C29A 169.2(2) . . . . ?
C28A C23A C24A C29A -3.3(4) . . . . ?
Nb1A C23A C24A C29A -121.4(2) . . . . ?
C22A C23A C24A Nb1A -69.39(16) . . . . ?
C28A C23A C24A Nb1A 118.1(2) . . . . ?
N1A Nb1A C24A C20A 113.62(14) . . . . ?
N2A Nb1A C24A C20A -159.02(13) . . . . ?
N12A Nb1A C24A C20A -48.44(18) . . . . ?
N11A Nb1A C24A C20A 19.90(16) . . . . ?
C23A Nb1A C24A C20A -112.87(19) . . . . ?
C22A Nb1A C24A C20A -76.00(15) . . . . ?
C21A Nb1A C24A C20A -36.43(13) . . . . ?
Nb2A Nb1A C24A C20A 155.82(12) . . . . ?
N1A Nb1A C24A C23A -133.51(14) . . . . ?
N2A Nb1A C24A C23A -46.16(15) . . . . ?
N12A Nb1A C24A C23A 64.43(17) . . . . ?
N11A Nb1A C24A C23A 132.77(13) . . . . ?
C20A Nb1A C24A C23A 112.87(19) . . . . ?
C22A Nb1A C24A C23A 36.87(13) . . . . ?
C21A Nb1A C24A C23A 76.44(14) . . . . ?
Nb2A Nb1A C24A C23A -91.31(13) . . . . ?
N1A Nb1A C24A C29A -7.8(2) . . . . ?
N2A Nb1A C24A C29A 79.5(2) . . . . ?
N12A Nb1A C24A C29A -169.88(19) . . . . ?
N11A Nb1A C24A C29A -101.5(2) . . . . ?
C23A Nb1A C24A C29A 125.7(3) . . . . ?
C20A Nb1A C24A C29A -121.4(3) . . . . ?
C22A Nb1A C24A C29A 162.6(3) . . . . ?
C21A Nb1A C24A C29A -157.9(3) . . . . ?
Nb2A Nb1A C24A C29A 34.4(2) . . . . ?
N2A Nb2A N31A C30A 120.19(14) . . . . ?
N1A Nb2A N31A C30A 41.99(17) . . . . ?
N32A Nb2A N31A C30A -5.91(12) . . . . ?
C44A Nb2A N31A C30A -135.12(13) . . . . ?
C40A Nb2A N31A C30A -129.28(14) . . . . ?
C43A Nb2A N31A C30A -98.09(15) . . . . ?
C41A Nb2A N31A C30A -97.76(14) . . . . ?
C42A Nb2A N31A C30A -79.71(14) . . . . ?
Nb1A Nb2A N31A C30A 87.42(13) . . . . ?
N2A Nb2A N31A C32A -34.2(3) . . . . ?
N1A Nb2A N31A C32A -112.4(3) . . . . ?
N32A Nb2A N31A C32A -160.3(3) . . . . ?
C44A Nb2A N31A C32A 70.5(3) . . . . ?
C40A Nb2A N31A C32A 76.3(3) . . . . ?
C43A Nb2A N31A C32A 107.5(3) . . . . ?
C41A Nb2A N31A C32A 107.8(3) . . . . ?
C42A Nb2A N31A C32A 125.9(3) . . . . ?
Nb1A Nb2A N31A C32A -67.0(3) . . . . ?
N2A Nb2A N32A C30A -59.32(15) . . . . ?
N1A Nb2A N32A C30A -144.25(14) . . . . ?
N31A Nb2A N32A C30A 5.87(12) . . . . ?
C44A Nb2A N32A C30A 103.52(16) . . . . ?
C40A Nb2A N32A C30A 72.34(15) . . . . ?
C43A Nb2A N32A C30A 131.45(14) . . . . ?
C41A Nb2A N32A C30A 85.52(14) . . . . ?
C42A Nb2A N32A C30A 116.91(14) . . . . ?
Nb1A Nb2A N32A C30A -103.98(13) . . . . ?
N2A Nb2A N32A C35A 108.1(2) . . . . ?
N1A Nb2A N32A C35A 23.1(2) . . . . ?
N31A Nb2A N32A C35A 173.3(2) . . . . ?
C44A Nb2A N32A C35A -89.1(2) . . . . ?
C40A Nb2A N32A C35A -120.3(2) . . . . ?
C43A Nb2A N32A C35A -61.2(2) . . . . ?
C41A Nb2A N32A C35A -107.1(2) . . . . ?
C42A Nb2A N32A C35A -75.7(2) . . . . ?
Nb1A Nb2A N32A C35A 63.4(2) . . . . ?
C32A N31A C30A N32A 172.41(19) . . . . ?
Nb2A N31A C30A N32A 8.69(18) . . . . ?
C32A N31A C30A C31A -6.8(3) . . . . ?
Nb2A N31A C30A C31A -170.5(2) . . . . ?
C35A N32A C30A N31A -178.2(2) . . . . ?
Nb2A N32A C30A N31A -9.8(2) . . . . ?
C35A N32A C30A C31A 1.0(4) . . . . ?
Nb2A N32A C30A C31A 169.4(2) . . . . ?
C30A N31A C32A C33A -145.0(2) . . . . ?
Nb2A N31A C32A C33A 4.9(4) . . . . ?
C30A N31A C32A C34A 90.1(3) . . . . ?
Nb2A N31A C32A C34A -119.9(3) . . . . ?
C30A N32A C35A C36A 66.6(3) . . . . ?
Nb2A N32A C35A C36A -98.0(2) . . . . ?
C30A N32A C35A C37A -62.5(3) . . . . ?
Nb2A N32A C35A C37A 133.0(2) . . . . ?
N2A Nb2A C40A C41A 160.43(15) . . . . ?
N1A Nb2A C40A C41A -95.86(18) . . . . ?
N32A Nb2A C40A C41A 25.43(18) . . . . ?
N31A Nb2A C40A C41A 75.74(16) . . . . ?
C44A Nb2A C40A C41A -113.7(2) . . . . ?
C43A Nb2A C40A C41A -75.42(16) . . . . ?
C42A Nb2A C40A C41A -36.20(14) . . . . ?
Nb1A Nb2A C40A C41A -159.97(12) . . . . ?
N2A Nb2A C40A C44A -85.84(16) . . . . ?
N1A Nb2A C40A C44A 17.9(2) . . . . ?
N32A Nb2A C40A C44A 139.16(14) . . . . ?
N31A Nb2A C40A C44A -170.53(15) . . . . ?
C43A Nb2A C40A C44A 38.30(14) . . . . ?
C41A Nb2A C40A C44A 113.7(2) . . . . ?
C42A Nb2A C40A C44A 77.53(16) . . . . ?
Nb1A Nb2A C40A C44A -46.24(18) . . . . ?
N2A Nb2A C40A C45A 33.9(2) . . . . ?
N1A Nb2A C40A C45A 137.6(2) . . . . ?
N32A Nb2A C40A C45A -101.1(2) . . . . ?
N31A Nb2A C40A C45A -50.8(2) . . . . ?
C44A Nb2A C40A C45A 119.8(3) . . . . ?
C43A Nb2A C40A C45A 158.1(3) . . . . ?
C41A Nb2A C40A C45A -126.5(3) . . . . ?
C42A Nb2A C40A C45A -162.7(3) . . . . ?
Nb1A Nb2A C40A C45A 73.5(3) . . . . ?
C44A C40A C41A C42A 1.0(3) . . . . ?
C45A C40A C41A C42A -173.9(2) . . . . ?
Nb2A C40A C41A C42A 66.95(16) . . . . ?
C44A C40A C41A C46A 176.7(2) . . . . ?
C45A C40A C41A C46A 1.8(4) . . . . ?
Nb2A C40A C41A C46A -117.3(2) . . . . ?
C44A C40A C41A Nb2A -65.95(16) . . . . ?
C45A C40A C41A Nb2A 119.2(3) . . . . ?
N2A Nb2A C41A C40A -29.0(2) . . . . ?
N1A Nb2A C41A C40A 114.69(17) . . . . ?
N32A Nb2A C41A C40A -156.96(16) . . . . ?
N31A Nb2A C41A C40A -99.92(16) . . . . ?
C44A Nb2A C41A C40A 38.39(15) . . . . ?
C43A Nb2A C41A C40A 79.76(17) . . . . ?
C42A Nb2A C41A C40A 115.4(2) . . . . ?
Nb1A Nb2A C41A C40A 61.4(3) . . . . ?
N2A Nb2A C41A C42A -144.34(15) . . . . ?
N1A Nb2A C41A C42A -0.7(2) . . . . ?
N32A Nb2A C41A C42A 87.66(15) . . . . ?
N31A Nb2A C41A C42A 144.71(16) . . . . ?
C44A Nb2A C41A C42A -76.98(16) . . . . ?
C40A Nb2A C41A C42A -115.4(2) . . . . ?
C43A Nb2A C41A C42A -35.61(14) . . . . ?
Nb1A Nb2A C41A C42A -53.9(3) . . . . ?
N2A Nb2A C41A C46A 93.7(3) . . . . ?
N1A Nb2A C41A C46A -122.7(2) . . . . ?
N32A Nb2A C41A C46A -34.3(2) . . . . ?
N31A Nb2A C41A C46A 22.7(2) . . . . ?
C44A Nb2A C41A C46A 161.0(3) . . . . ?
C40A Nb2A C41A C46A 122.7(3) . . . . ?
C43A Nb2A C41A C46A -157.6(3) . . . . ?
C42A Nb2A C41A C46A -122.0(3) . . . . ?
Nb1A Nb2A C41A C46A -175.92(17) . . . . ?
C40A C41A C42A C43A -0.4(3) . . . . ?
C46A C41A C42A C43A -176.3(2) . . . . ?
Nb2A C41A C42A C43A 62.95(17) . . . . ?
C40A C41A C42A C47A 175.0(2) . . . . ?
C46A C41A C42A C47A -0.8(4) . . . . ?
Nb2A C41A C42A C47A -121.6(3) . . . . ?
C40A C41A C42A Nb2A -63.38(16) . . . . ?
C46A C41A C42A Nb2A 120.7(2) . . . . ?
N2A Nb2A C42A C43A -35.4(3) . . . . ?
N1A Nb2A C42A C43A 62.54(16) . . . . ?
N32A Nb2A C42A C43A 153.43(16) . . . . ?
N31A Nb2A C42A C43A -152.78(15) . . . . ?
C44A Nb2A C42A C43A -38.09(15) . . . . ?
C40A Nb2A C42A C43A -79.93(17) . . . . ?
C41A Nb2A C42A C43A -116.9(2) . . . . ?
Nb1A Nb2A C42A C43A 44.93(18) . . . . ?
N2A Nb2A C42A C41A 81.6(3) . . . . ?
N1A Nb2A C42A C41A 179.47(15) . . . . ?
N32A Nb2A C42A C41A -89.63(16) . . . . ?
N31A Nb2A C42A C41A -35.84(16) . . . . ?
C44A Nb2A C42A C41A 78.84(17) . . . . ?
C40A Nb2A C42A C41A 37.01(15) . . . . ?
C43A Nb2A C42A C41A 116.9(2) . . . . ?
Nb1A Nb2A C42A C41A 161.87(12) . . . . ?
N2A Nb2A C42A C47A -155.7(2) . . . . ?
N1A Nb2A C42A C47A -57.8(2) . . . . ?
N32A Nb2A C42A C47A 33.1(2) . . . . ?
N31A Nb2A C42A C47A 86.9(2) . . . . ?
C44A Nb2A C42A C47A -158.4(3) . . . . ?
C40A Nb2A C42A C47A 159.7(3) . . . . ?
C43A Nb2A C42A C47A -120.3(3) . . . . ?
C41A Nb2A C42A C47A 122.7(3) . . . . ?
Nb1A Nb2A C42A C47A -75.4(3) . . . . ?
C41A C42A C43A C44A -0.3(3) . . . . ?
C47A C42A C43A C44A -175.9(2) . . . . ?
Nb2A C42A C43A C44A 63.71(16) . . . . ?
C41A C42A C43A C48A 175.9(2) . . . . ?
C47A C42A C43A C48A 0.3(4) . . . . ?
Nb2A C42A C43A C48A -120.1(2) . . . . ?
C41A C42A C43A Nb2A -64.03(17) . . . . ?
C47A C42A C43A Nb2A 120.4(2) . . . . ?
N2A Nb2A C43A C42A 163.46(14) . . . . ?
N1A Nb2A C43A C42A -118.22(16) . . . . ?
N32A Nb2A C43A C42A -28.87(17) . . . . ?
N31A Nb2A C43A C42A 36.13(19) . . . . ?
C44A Nb2A C43A C42A 114.6(2) . . . . ?
C40A Nb2A C43A C42A 75.95(16) . . . . ?
C41A Nb2A C43A C42A 35.72(15) . . . . ?
Nb1A Nb2A C43A C42A -149.31(13) . . . . ?
N2A Nb2A C43A C44A 48.88(18) . . . . ?
N1A Nb2A C43A C44A 127.21(15) . . . . ?
N32A Nb2A C43A C44A -143.44(14) . . . . ?
N31A Nb2A C43A C44A -78.44(17) . . . . ?
C40A Nb2A C43A C44A -38.62(14) . . . . ?
C41A Nb2A C43A C44A -78.86(16) . . . . ?
C42A Nb2A C43A C44A -114.6(2) . . . . ?
Nb1A Nb2A C43A C44A 96.12(14) . . . . ?
N2A Nb2A C43A C48A -72.9(2) . . . . ?
N1A Nb2A C43A C48A 5.4(2) . . . . ?
N32A Nb2A C43A C48A 94.8(2) . . . . ?
N31A Nb2A C43A C48A 159.8(2) . . . . ?
C44A Nb2A C43A C48A -121.8(3) . . . . ?
C40A Nb2A C43A C48A -160.4(3) . . . . ?
C41A Nb2A C43A C48A 159.4(3) . . . . ?
C42A Nb2A C43A C48A 123.7(3) . . . . ?
Nb1A Nb2A C43A C48A -25.6(2) . . . . ?
C41A C40A C44A C43A -1.2(3) . . . . ?
C45A C40A C44A C43A 173.9(2) . . . . ?
Nb2A C40A C44A C43A -71.24(16) . . . . ?
C41A C40A C44A C49A -165.8(2) . . . . ?
C45A C40A C44A C49A 9.3(4) . . . . ?
Nb2A C40A C44A C49A 124.1(2) . . . . ?
C41A C40A C44A Nb2A 70.04(16) . . . . ?
C45A C40A C44A Nb2A -114.9(2) . . . . ?
C42A C43A C44A C40A 0.9(3) . . . . ?
C48A C43A C44A C40A -175.1(2) . . . . ?
Nb2A C43A C44A C40A 69.77(16) . . . . ?
C42A C43A C44A C49A 165.4(2) . . . . ?
C48A C43A C44A C49A -10.7(4) . . . . ?
Nb2A C43A C44A C49A -125.8(2) . . . . ?
C42A C43A C44A Nb2A -68.83(17) . . . . ?
C48A C43A C44A Nb2A 115.1(2) . . . . ?
N2A Nb2A C44A C40A 104.66(15) . . . . ?
N1A Nb2A C44A C40A -167.27(14) . . . . ?
N32A Nb2A C44A C40A -59.62(19) . . . . ?
N31A Nb2A C44A C40A 10.73(17) . . . . ?
C43A Nb2A C44A C40A -112.6(2) . . . . ?
C41A Nb2A C44A C40A -37.08(14) . . . . ?
C42A Nb2A C44A C40A -76.42(16) . . . . ?
Nb1A Nb2A C44A C40A 149.14(13) . . . . ?
N2A Nb2A C44A C43A -142.74(14) . . . . ?
N1A Nb2A C44A C43A -54.67(16) . . . . ?
N32A Nb2A C44A C43A 52.97(19) . . . . ?
N31A Nb2A C44A C43A 123.33(14) . . . . ?
C40A Nb2A C44A C43A 112.6(2) . . . . ?
C41A Nb2A C44A C43A 75.52(16) . . . . ?
C42A Nb2A C44A C43A 36.17(14) . . . . ?
Nb1A Nb2A C44A C43A -98.26(14) . . . . ?
N2A Nb2A C44A C49A -17.8(3) . . . . ?
N1A Nb2A C44A C49A 70.3(3) . . . . ?
N32A Nb2A C44A C49A 178.0(2) . . . . ?
N31A Nb2A C44A C49A -111.7(2) . . . . ?
C40A Nb2A C44A C49A -122.4(3) . . . . ?
C43A Nb2A C44A C49A 125.0(3) . . . . ?
C41A Nb2A C44A C49A -159.5(3) . . . . ?
C42A Nb2A C44A C49A 161.2(3) . . . . ?
Nb1A Nb2A C44A C49A 26.7(3) . . . . ?
N1B Nb1B Nb2B N2B 173.15(12) . . . . ?
N12B Nb1B Nb2B N2B -71.22(11) . . . . ?
N11B Nb1B Nb2B N2B -131.91(10) . . . . ?
C24B Nb1B Nb2B N2B 89.28(12) . . . . ?
C20B Nb1B Nb2B N2B 111.29(13) . . . . ?
C23B Nb1B Nb2B N2B 54.35(12) . . . . ?
C21B Nb1B Nb2B N2B 59.1(2) . . . . ?
C22B Nb1B Nb2B N2B 30.09(13) . . . . ?
N2B Nb1B Nb2B N1B -173.15(12) . . . . ?
N12B Nb1B Nb2B N1B 115.63(10) . . . . ?
N11B Nb1B Nb2B N1B 54.94(10) . . . . ?
C24B Nb1B Nb2B N1B -83.87(11) . . . . ?
C20B Nb1B Nb2B N1B -61.86(12) . . . . ?
C23B Nb1B Nb2B N1B -118.80(11) . . . . ?
C21B Nb1B Nb2B N1B -114.1(2) . . . . ?
C22B Nb1B Nb2B N1B -143.06(12) . . . . ?
N1B Nb1B Nb2B N32B -71.65(10) . . . . ?
N2B Nb1B Nb2B N32B 115.20(11) . . . . ?
N12B Nb1B Nb2B N32B 43.98(8) . . . . ?
N11B Nb1B Nb2B N32B -16.71(7) . . . . ?
C24B Nb1B Nb2B N32B -155.52(9) . . . . ?
C20B Nb1B Nb2B N32B -133.51(11) . . . . ?
C23B Nb1B Nb2B N32B 169.55(9) . . . . ?
C21B Nb1B Nb2B N32B 174.3(2) . . . . ?
C22B Nb1B Nb2B N32B 145.29(11) . . . . ?
N1B Nb1B Nb2B N31B -132.96(10) . . . . ?
N2B Nb1B Nb2B N31B 53.89(11) . . . . ?
N12B Nb1B Nb2B N31B -17.33(8) . . . . ?
N11B Nb1B Nb2B N31B -78.02(7) . . . . ?
C24B Nb1B Nb2B N31B 143.17(9) . . . . ?
C20B Nb1B Nb2B N31B 165.18(11) . . . . ?
C23B Nb1B Nb2B N31B 108.24(9) . . . . ?
C21B Nb1B Nb2B N31B 113.0(2) . . . . ?
C22B Nb1B Nb2B N31B 83.98(11) . . . . ?
N1B Nb1B Nb2B C44B 90.70(11) . . . . ?
N2B Nb1B Nb2B C44B -82.45(12) . . . . ?
N12B Nb1B Nb2B C44B -153.67(9) . . . . ?
N11B Nb1B Nb2B C44B 145.65(9) . . . . ?
C24B Nb1B Nb2B C44B 6.83(11) . . . . ?
C20B Nb1B Nb2B C44B 28.85(12) . . . . ?
C23B Nb1B Nb2B C44B -28.10(11) . . . . ?
C21B Nb1B Nb2B C44B -23.4(2) . . . . ?
C22B Nb1B Nb2B C44B -52.36(12) . . . . ?
N1B Nb1B Nb2B C43B 55.00(11) . . . . ?
N2B Nb1B Nb2B C43B -118.15(11) . . . . ?
N12B Nb1B Nb2B C43B 170.63(9) . . . . ?
N11B Nb1B Nb2B C43B 109.94(9) . . . . ?
C24B Nb1B Nb2B C43B -28.87(10) . . . . ?
C20B Nb1B Nb2B C43B -6.86(12) . . . . ?
C23B Nb1B Nb2B C43B -63.81(11) . . . . ?
C21B Nb1B Nb2B C43B -59.1(2) . . . . ?
C22B Nb1B Nb2B C43B -88.06(11) . . . . ?
N1B Nb1B Nb2B C40B 112.62(13) . . . . ?
N2B Nb1B Nb2B C40B -60.54(13) . . . . ?
N12B Nb1B Nb2B C40B -131.75(11) . . . . ?
N11B Nb1B Nb2B C40B 167.56(11) . . . . ?
C24B Nb1B Nb2B C40B 28.75(12) . . . . ?
C20B Nb1B Nb2B C40B 50.76(13) . . . . ?
C23B Nb1B Nb2B C40B -6.19(12) . . . . ?
C21B Nb1B Nb2B C40B -1.5(2) . . . . ?
C22B Nb1B Nb2B C40B -30.44(13) . . . . ?
N1B Nb1B Nb2B C41B 52.2(2) . . . . ?
N2B Nb1B Nb2B C41B -120.9(2) . . . . ?
N12B Nb1B Nb2B C41B 167.9(2) . . . . ?
N11B Nb1B Nb2B C41B 107.2(2) . . . . ?
C24B Nb1B Nb2B C41B -31.6(2) . . . . ?
C20B Nb1B Nb2B C41B -9.6(2) . . . . ?
C23B Nb1B Nb2B C41B -66.6(2) . . . . ?
C21B Nb1B Nb2B C41B -61.8(3) . . . . ?
C22B Nb1B Nb2B C41B -90.8(2) . . . . ?
N1B Nb1B Nb2B C42B 28.70(12) . . . . ?
N2B Nb1B Nb2B C42B -144.45(12) . . . . ?
N12B Nb1B Nb2B C42B 144.33(10) . . . . ?
N11B Nb1B Nb2B C42B 83.64(10) . . . . ?
C24B Nb1B Nb2B C42B -55.17(11) . . . . ?
C20B Nb1B Nb2B C42B -33.16(12) . . . . ?
C23B Nb1B Nb2B C42B -90.10(11) . . . . ?
C21B Nb1B Nb2B C42B -85.4(2) . . . . ?
C22B Nb1B Nb2B C42B -114.36(12) . . . . ?
N2B Nb1B N1B Nb2B 4.58(8) . . . . ?
N12B Nb1B N1B Nb2B -83.06(9) . . . . ?
N11B Nb1B N1B Nb2B -132.71(8) . . . . ?
C24B Nb1B N1B Nb2B 109.44(9) . . . . ?
C20B Nb1B N1B Nb2B 142.69(8) . . . . ?
C23B Nb1B N1B Nb2B 83.01(11) . . . . ?
C21B Nb1B N1B Nb2B 154.12(10) . . . . ?
C22B Nb1B N1B Nb2B 96.83(19) . . . . ?
N2B Nb2B N1B Nb1B -4.65(8) . . . . ?
N32B Nb2B N1B Nb1B 114.42(8) . . . . ?
N31B Nb2B N1B Nb1B 75.86(12) . . . . ?
C44B Nb2B N1B Nb1B -106.47(9) . . . . ?
C43B Nb2B N1B Nb1B -130.15(9) . . . . ?
C40B Nb2B N1B Nb1B -122.84(11) . . . . ?
C41B Nb2B N1B Nb1B -164.39(8) . . . . ?
C42B Nb2B N1B Nb1B -159.95(8) . . . . ?
N1B Nb2B N2B Nb1B 4.58(8) . . . . ?
N32B Nb2B N2B Nb1B -82.82(10) . . . . ?
N31B Nb2B N2B Nb1B -133.34(8) . . . . ?
C44B Nb2B N2B Nb1B 112.29(9) . . . . ?
C43B Nb2B N2B Nb1B 84.83(11) . . . . ?
C40B Nb2B N2B Nb1B 145.32(8) . . . . ?
C41B Nb2B N2B Nb1B 157.11(10) . . . . ?
C42B Nb2B N2B Nb1B 97.2(2) . . . . ?
N1B Nb1B N2B Nb2B -4.67(8) . . . . ?
N12B Nb1B N2B Nb2B 115.14(8) . . . . ?
N11B Nb1B N2B Nb2B 77.13(12) . . . . ?
C24B Nb1B N2B Nb2B -105.48(9) . . . . ?
C20B Nb1B N2B Nb2B -119.41(11) . . . . ?
C23B Nb1B N2B Nb2B -129.78(10) . . . . ?
C21B Nb1B N2B Nb2B -161.24(7) . . . . ?
C22B Nb1B N2B Nb2B -158.79(9) . . . . ?
N1B Nb1B N11B C10B 120.95(13) . . . . ?
N2B Nb1B N11B C10B 40.80(17) . . . . ?
N12B Nb1B N11B C10B -6.67(12) . . . . ?
C24B Nb1B N11B C10B -136.37(13) . . . . ?
C20B Nb1B N11B C10B -127.89(14) . . . . ?
C23B Nb1B N11B C10B -100.92(16) . . . . ?
C21B Nb1B N11B C10B -96.09(14) . . . . ?
C22B Nb1B N11B C10B -79.35(14) . . . . ?
Nb2B Nb1B N11B C10B 87.19(12) . . . . ?
N1B Nb1B N11B C12B -33.7(3) . . . . ?
N2B Nb1B N11B C12B -113.9(3) . . . . ?
N12B Nb1B N11B C12B -161.3(3) . . . . ?
C24B Nb1B N11B C12B 69.0(3) . . . . ?
C20B Nb1B N11B C12B 77.4(3) . . . . ?
C23B Nb1B N11B C12B 104.4(3) . . . . ?
C21B Nb1B N11B C12B 109.2(3) . . . . ?
C22B Nb1B N11B C12B 126.0(3) . . . . ?
Nb2B Nb1B N11B C12B -67.5(3) . . . . ?
N1B Nb1B N12B C10B -59.09(16) . . . . ?
N2B Nb1B N12B C10B -143.01(14) . . . . ?
N11B Nb1B N12B C10B 6.67(12) . . . . ?
C24B Nb1B N12B C10B 102.94(17) . . . . ?
C20B Nb1B N12B C10B 74.37(15) . . . . ?
C23B Nb1B N12B C10B 133.65(14) . . . . ?
C21B Nb1B N12B C10B 89.27(14) . . . . ?
C22B Nb1B N12B C10B 120.96(15) . . . . ?
Nb2B Nb1B N12B C10B -103.89(13) . . . . ?
N1B Nb1B N12B C15B 104.0(2) . . . . ?
N2B Nb1B N12B C15B 20.1(2) . . . . ?
N11B Nb1B N12B C15B 169.7(2) . . . . ?
C24B Nb1B N12B C15B -94.0(2) . . . . ?
C20B Nb1B N12B C15B -122.6(2) . . . . ?
C23B Nb1B N12B C15B -63.3(2) . . . . ?
C21B Nb1B N12B C15B -107.7(2) . . . . ?
C22B Nb1B N12B C15B -76.0(2) . . . . ?
Nb2B Nb1B N12B C15B 59.2(2) . . . . ?
C12B N11B C10B N12B 173.32(19) . . . . ?
Nb1B N11B C10B N12B 9.86(18) . . . . ?
C12B N11B C10B C11B -5.6(3) . . . . ?
Nb1B N11B C10B C11B -169.0(2) . . . . ?
C15B N12B C10B N11B -175.2(2) . . . . ?
Nb1B N12B C10B N11B -11.0(2) . . . . ?
C15B N12B C10B C11B 3.7(4) . . . . ?
Nb1B N12B C10B C11B 167.84(19) . . . . ?
C10B N11B C12B C13B -147.9(2) . . . . ?
Nb1B N11B C12B C13B 2.2(4) . . . . ?
C10B N11B C12B C14B 88.2(3) . . . . ?
Nb1B N11B C12B C14B -121.6(2) . . . . ?
C10B N12B C15B C16B 64.0(3) . . . . ?
Nb1B N12B C15B C16B -95.1(3) . . . . ?
C10B N12B C15B C17B -65.3(3) . . . . ?
Nb1B N12B C15B C17B 135.6(2) . . . . ?
N1B Nb1B C20B C21B 166.53(15) . . . . ?
N2B Nb1B C20B C21B -88.88(18) . . . . ?
N12B Nb1B C20B C21B 28.99(17) . . . . ?
N11B Nb1B C20B C21B 79.84(15) . . . . ?
C24B Nb1B C20B C21B -114.0(2) . . . . ?
C23B Nb1B C20B C21B -76.07(17) . . . . ?
C22B Nb1B C20B C21B -36.50(15) . . . . ?
Nb2B Nb1B C20B C21B -153.62(12) . . . . ?
N1B Nb1B C20B C24B -79.45(17) . . . . ?
N2B Nb1B C20B C24B 25.1(2) . . . . ?
N12B Nb1B C20B C24B 143.01(16) . . . . ?
N11B Nb1B C20B C24B -166.14(16) . . . . ?
C23B Nb1B C20B C24B 37.95(16) . . . . ?
C21B Nb1B C20B C24B 114.0(2) . . . . ?
C22B Nb1B C20B C24B 77.52(17) . . . . ?
Nb2B Nb1B C20B C24B -39.6(2) . . . . ?
N1B Nb1B C20B C25B 40.1(2) . . . . ?
N2B Nb1B C20B C25B 144.7(2) . . . . ?
N12B Nb1B C20B C25B -97.5(2) . . . . ?
N11B Nb1B C20B C25B -46.6(2) . . . . ?
C24B Nb1B C20B C25B 119.5(3) . . . . ?
C23B Nb1B C20B C25B 157.5(3) . . . . ?
C21B Nb1B C20B C25B -126.4(3) . . . . ?
C22B Nb1B C20B C25B -162.9(3) . . . . ?
Nb2B Nb1B C20B C25B 79.9(2) . . . . ?
C24B C20B C21B C22B 0.9(3) . . . . ?
C25B C20B C21B C22B -171.6(2) . . . . ?
Nb1B C20B C21B C22B 66.13(17) . . . . ?
C24B C20B C21B C26B 177.3(2) . . . . ?
C25B C20B C21B C26B 4.8(4) . . . . ?
Nb1B C20B C21B C26B -117.5(2) . . . . ?
C24B C20B C21B Nb1B -65.20(15) . . . . ?
C25B C20B C21B Nb1B 122.3(3) . . . . ?
N1B Nb1B C21B C20B -20.5(2) . . . . ?
N2B Nb1B C21B C20B 119.95(16) . . . . ?
N12B Nb1B C21B C20B -153.35(16) . . . . ?
N11B Nb1B C21B C20B -96.26(15) . . . . ?
C24B Nb1B C21B C20B 38.28(15) . . . . ?
C23B Nb1B C21B C20B 79.34(17) . . . . ?
C22B Nb1B C21B C20B 115.3(2) . . . . ?
Nb2B Nb1B C21B C20B 73.8(3) . . . . ?
N1B Nb1B C21B C22B -135.80(17) . . . . ?
N2B Nb1B C21B C22B 4.6(2) . . . . ?
N12B Nb1B C21B C22B 91.35(16) . . . . ?
N11B Nb1B C21B C22B 148.43(17) . . . . ?
C24B Nb1B C21B C22B -77.02(17) . . . . ?
C20B Nb1B C21B C22B -115.3(2) . . . . ?
C23B Nb1B C21B C22B -35.96(16) . . . . ?
Nb2B Nb1B C21B C22B -41.5(3) . . . . ?
N1B Nb1B C21B C26B 101.0(3) . . . . ?
N2B Nb1B C21B C26B -118.6(2) . . . . ?
N12B Nb1B C21B C26B -31.9(2) . . . . ?
N11B Nb1B C21B C26B 25.2(2) . . . . ?
C24B Nb1B C21B C26B 159.8(3) . . . . ?
C20B Nb1B C21B C26B 121.5(3) . . . . ?
C23B Nb1B C21B C26B -159.2(3) . . . . ?
C22B Nb1B C21B C26B -123.2(3) . . . . ?
Nb2B Nb1B C21B C26B -164.73(17) . . . . ?
C20B C21B C22B C23B -0.4(3) . . . . ?
C26B C21B C22B C23B -176.8(2) . . . . ?
Nb1B C21B C22B C23B 63.25(17) . . . . ?
C20B C21B C22B C27B 177.1(3) . . . . ?
C26B C21B C22B C27B 0.7(4) . . . . ?
Nb1B C21B C22B C27B -119.2(3) . . . . ?
C20B C21B C22B Nb1B -63.67(16) . . . . ?
C26B C21B C22B Nb1B 119.9(2) . . . . ?
N1B Nb1B C22B C23B -22.3(3) . . . . ?
N2B Nb1B C22B C23B 67.28(18) . . . . ?
N12B Nb1B C22B C23B 157.62(17) . . . . ?
N11B Nb1B C22B C23B -149.29(16) . . . . ?
C24B Nb1B C22B C23B -37.79(16) . . . . ?
C20B Nb1B C22B C23B -79.57(18) . . . . ?
C21B Nb1B C22B C23B -116.4(2) . . . . ?
Nb2B Nb1B C22B C23B 47.6(2) . . . . ?
N1B Nb1B C22B C21B 94.1(2) . . . . ?
N2B Nb1B C22B C21B -176.30(16) . . . . ?
N12B Nb1B C22B C21B -85.96(16) . . . . ?
N11B Nb1B C22B C21B -32.86(17) . . . . ?
C24B Nb1B C22B C21B 78.64(17) . . . . ?
C20B Nb1B C22B C21B 36.86(14) . . . . ?
C23B Nb1B C22B C21B 116.4(2) . . . . ?
Nb2B Nb1B C22B C21B 164.07(12) . . . . ?
N1B Nb1B C22B C27B -142.3(3) . . . . ?
N2B Nb1B C22B C27B -52.7(3) . . . . ?
N12B Nb1B C22B C27B 37.6(3) . . . . ?
N11B Nb1B C22B C27B 90.7(3) . . . . ?
C24B Nb1B C22B C27B -157.8(3) . . . . ?
C20B Nb1B C22B C27B 160.5(3) . . . . ?
C23B Nb1B C22B C27B -120.0(3) . . . . ?
C21B Nb1B C22B C27B 123.6(3) . . . . ?
Nb2B Nb1B C22B C27B -72.3(3) . . . . ?
C21B C22B C23B C24B -0.3(3) . . . . ?
C27B C22B C23B C24B -177.9(3) . . . . ?
Nb1B C22B C23B C24B 64.68(17) . . . . ?
C21B C22B C23B C28B 174.4(2) . . . . ?
C27B C22B C23B C28B -3.2(4) . . . . ?
Nb1B C22B C23B C28B -120.6(3) . . . . ?
C21B C22B C23B Nb1B -64.93(17) . . . . ?
C27B C22B C23B Nb1B 117.5(3) . . . . ?
N1B Nb1B C23B C22B 168.55(15) . . . . ?
N2B Nb1B C23B C22B -112.65(18) . . . . ?
N12B Nb1B C23B C22B -24.78(19) . . . . ?
N11B Nb1B C23B C22B 42.1(2) . . . . ?
C24B Nb1B C23B C22B 114.7(2) . . . . ?
C20B Nb1B C23B C22B 76.17(17) . . . . ?
C21B Nb1B C23B C22B 36.09(15) . . . . ?
Nb2B Nb1B C23B C22B -145.66(15) . . . . ?
N1B Nb1B C23B C24B 53.89(17) . . . . ?
N2B Nb1B C23B C24B 132.69(16) . . . . ?
N12B Nb1B C23B C24B -139.44(14) . . . . ?
N11B Nb1B C23B C24B -72.59(18) . . . . ?
C20B Nb1B C23B C24B -38.50(14) . . . . ?
C21B Nb1B C23B C24B -78.57(16) . . . . ?
C22B Nb1B C23B C24B -114.7(2) . . . . ?
Nb2B Nb1B C23B C24B 99.67(14) . . . . ?
N1B Nb1B C23B C28B -68.8(3) . . . . ?
N2B Nb1B C23B C28B 10.0(3) . . . . ?
N12B Nb1B C23B C28B 97.9(3) . . . . ?
N11B Nb1B C23B C28B 164.7(2) . . . . ?
C24B Nb1B C23B C28B -122.7(3) . . . . ?
C20B Nb1B C23B C28B -161.2(3) . . . . ?
C21B Nb1B C23B C28B 158.8(3) . . . . ?
C22B Nb1B C23B C28B 122.7(4) . . . . ?
Nb2B Nb1B C23B C28B -23.0(3) . . . . ?
C22B C23B C24B C20B 0.8(3) . . . . ?
C28B C23B C24B C20B -173.6(2) . . . . ?
Nb1B C23B C24B C20B 69.80(16) . . . . ?
C22B C23B C24B C29B 168.1(2) . . . . ?
C28B C23B C24B C29B -6.4(4) . . . . ?
Nb1B C23B C24B C29B -123.0(3) . . . . ?
C22B C23B C24B Nb1B -68.97(18) . . . . ?
C28B C23B C24B Nb1B 116.6(3) . . . . ?
C21B C20B C24B C23B -1.1(3) . . . . ?
C25B C20B C24B C23B 171.7(2) . . . . ?
Nb1B C20B C24B C23B -70.34(17) . . . . ?
C21B C20B C24B C29B -169.1(2) . . . . ?
C25B C20B C24B C29B 3.7(4) . . . . ?
Nb1B C20B C24B C29B 121.7(2) . . . . ?
C21B C20B C24B Nb1B 69.24(16) . . . . ?
C25B C20B C24B Nb1B -118.0(2) . . . . ?
N1B Nb1B C24B C23B -136.75(15) . . . . ?
N2B Nb1B C24B C23B -49.35(16) . . . . ?
N12B Nb1B C24B C23B 59.14(19) . . . . ?
N11B Nb1B C24B C23B 128.63(15) . . . . ?
C20B Nb1B C24B C23B 113.0(2) . . . . ?
C21B Nb1B C24B C23B 76.14(17) . . . . ?
C22B Nb1B C24B C23B 36.44(15) . . . . ?
Nb2B Nb1B C24B C23B -93.15(15) . . . . ?
N1B Nb1B C24B C20B 110.23(16) . . . . ?
N2B Nb1B C24B C20B -162.37(15) . . . . ?
N12B Nb1B C24B C20B -53.9(2) . . . . ?
N11B Nb1B C24B C20B 15.62(18) . . . . ?
C23B Nb1B C24B C20B -113.0(2) . . . . ?
C21B Nb1B C24B C20B -36.88(15) . . . . ?
C22B Nb1B C24B C20B -76.58(17) . . . . ?
Nb2B Nb1B C24B C20B 153.84(14) . . . . ?
N1B Nb1B C24B C29B -10.1(3) . . . . ?
N2B Nb1B C24B C29B 77.3(3) . . . . ?
N12B Nb1B C24B C29B -174.2(2) . . . . ?
N11B Nb1B C24B C29B -104.7(2) . . . . ?
C20B Nb1B C24B C29B -120.4(3) . . . . ?
C23B Nb1B C24B C29B 126.6(3) . . . . ?
C21B Nb1B C24B C29B -157.2(3) . . . . ?
C22B Nb1B C24B C29B 163.1(3) . . . . ?
Nb2B Nb1B C24B C29B 33.5(3) . . . . ?
N2B Nb2B N31B C30B 121.25(14) . . . . ?
N1B Nb2B N31B C30B 42.14(18) . . . . ?
N32B Nb2B N31B C30B -5.55(13) . . . . ?
C44B Nb2B N31B C30B -135.44(14) . . . . ?
C43B Nb2B N31B C30B -101.89(16) . . . . ?
C40B Nb2B N31B C30B -125.51(15) . . . . ?
C41B Nb2B N31B C30B -93.36(15) . . . . ?
C42B Nb2B N31B C30B -78.41(15) . . . . ?
Nb1B Nb2B N31B C30B 88.07(13) . . . . ?
N2B Nb2B N31B C32B -33.5(3) . . . . ?
N1B Nb2B N31B C32B -112.6(3) . . . . ?
N32B Nb2B N31B C32B -160.3(3) . . . . ?
C44B Nb2B N31B C32B 69.8(3) . . . . ?
C43B Nb2B N31B C32B 103.3(3) . . . . ?
C40B Nb2B N31B C32B 79.7(3) . . . . ?
C41B Nb2B N31B C32B 111.9(3) . . . . ?
C42B Nb2B N31B C32B 126.8(3) . . . . ?
Nb1B Nb2B N31B C32B -66.7(3) . . . . ?
N2B Nb2B N32B C30B -60.61(16) . . . . ?
N1B Nb2B N32B C30B -144.30(15) . . . . ?
N31B Nb2B N32B C30B 5.56(13) . . . . ?
C44B Nb2B N32B C30B 98.13(17) . . . . ?
C43B Nb2B N32B C30B 130.63(14) . . . . ?
C40B Nb2B N32B C30B 72.21(15) . . . . ?
C41B Nb2B N32B C30B 88.03(15) . . . . ?
C42B Nb2B N32B C30B 119.38(15) . . . . ?
Nb1B Nb2B N32B C30B -105.05(13) . . . . ?
N2B Nb2B N32B C35B 107.6(2) . . . . ?
N1B Nb2B N32B C35B 23.9(2) . . . . ?
N31B Nb2B N32B C35B 173.8(2) . . . . ?
C44B Nb2B N32B C35B -93.6(2) . . . . ?
C43B Nb2B N32B C35B -61.1(2) . . . . ?
C40B Nb2B N32B C35B -119.6(2) . . . . ?
C41B Nb2B N32B C35B -103.7(2) . . . . ?
C42B Nb2B N32B C35B -72.4(2) . . . . ?
Nb1B Nb2B N32B C35B 63.2(2) . . . . ?
C32B N31B C30B N32B 171.0(2) . . . . ?
Nb2B N31B C30B N32B 8.29(19) . . . . ?
C32B N31B C30B C31B -8.6(4) . . . . ?
Nb2B N31B C30B C31B -171.3(2) . . . . ?
C35B N32B C30B N31B -178.0(2) . . . . ?
Nb2B N32B C30B N31B -9.1(2) . . . . ?
C35B N32B C30B C31B 1.5(4) . . . . ?
Nb2B N32B C30B C31B 170.5(2) . . . . ?
C30B N31B C32B C33B -148.3(2) . . . . ?
Nb2B N31B C32B C33B 1.6(4) . . . . ?
C30B N31B C32B C34B 86.6(3) . . . . ?
Nb2B N31B C32B C34B -123.5(3) . . . . ?
C30B N32B C35B C36B 68.0(3) . . . . ?
Nb2B N32B C35B C36B -97.2(3) . . . . ?
C30B N32B C35B C37B -61.8(3) . . . . ?
Nb2B N32B C35B C37B 133.0(2) . . . . ?
N2B Nb2B C40B C44B -78.49(17) . . . . ?
N1B Nb2B C40B C44B 29.5(2) . . . . ?
N32B Nb2B C40B C44B 145.60(15) . . . . ?
N31B Nb2B C40B C44B -163.13(16) . . . . ?
C43B Nb2B C40B C44B 38.61(15) . . . . ?
C41B Nb2B C40B C44B 114.8(2) . . . . ?
C42B Nb2B C40B C44B 78.57(17) . . . . ?
Nb1B Nb2B C40B C44B -38.8(2) . . . . ?
N2B Nb2B C40B C41B 166.67(14) . . . . ?
N1B Nb2B C40B C41B -85.30(19) . . . . ?
N32B Nb2B C40B C41B 30.76(17) . . . . ?
N31B Nb2B C40B C41B 82.03(15) . . . . ?
C44B Nb2B C40B C41B -114.8(2) . . . . ?
C43B Nb2B C40B C41B -76.23(16) . . . . ?
C42B Nb2B C40B C41B -36.27(14) . . . . ?
Nb1B Nb2B C40B C41B -153.61(12) . . . . ?
N2B Nb2B C40B C45B 40.3(3) . . . . ?
N1B Nb2B C40B C45B 148.4(2) . . . . ?
N32B Nb2B C40B C45B -95.6(3) . . . . ?
N31B Nb2B C40B C45B -44.3(3) . . . . ?
C44B Nb2B C40B C45B 118.8(3) . . . . ?
C43B Nb2B C40B C45B 157.4(3) . . . . ?
C41B Nb2B C40B C45B -126.3(3) . . . . ?
C42B Nb2B C40B C45B -162.6(3) . . . . ?
Nb1B Nb2B C40B C45B 80.0(3) . . . . ?
C44B C40B C41B C42B 2.2(3) . . . . ?
C45B C40B C41B C42B -169.0(2) . . . . ?
Nb2B C40B C41B C42B 66.37(16) . . . . ?
C44B C40B C41B C46B 178.5(2) . . . . ?
C45B C40B C41B C46B 7.3(4) . . . . ?
Nb2B C40B C41B C46B -117.4(2) . . . . ?
C44B C40B C41B Nb2B -64.14(15) . . . . ?
C45B C40B C41B Nb2B 124.7(3) . . . . ?
N2B Nb2B C41B C42B -136.20(17) . . . . ?
N1B Nb2B C41B C42B 8.52(19) . . . . ?
N32B Nb2B C41B C42B 93.56(16) . . . . ?
N31B Nb2B C41B C42B 151.71(16) . . . . ?
C44B Nb2B C41B C42B -77.66(17) . . . . ?
C43B Nb2B C41B C42B -36.26(15) . . . . ?
C40B Nb2B C41B C42B -115.3(2) . . . . ?
Nb1B Nb2B C41B C42B -33.0(3) . . . . ?
N2B Nb2B C41B C40B -20.9(2) . . . . ?
N1B Nb2B C41B C40B 123.83(16) . . . . ?
N32B Nb2B C41B C40B -151.13(16) . . . . ?
N31B Nb2B C41B C40B -92.98(16) . . . . ?
C44B Nb2B C41B C40B 37.65(15) . . . . ?
C43B Nb2B C41B C40B 79.05(16) . . . . ?
C42B Nb2B C41B C40B 115.3(2) . . . . ?
Nb1B Nb2B C41B C40B 82.3(3) . . . . ?
N2B Nb2B C41B C46B 101.3(3) . . . . ?
N1B Nb2B C41B C46B -114.0(2) . . . . ?
N32B Nb2B C41B C46B -29.0(2) . . . . ?
N31B Nb2B C41B C46B 29.2(2) . . . . ?
C44B Nb2B C41B C46B 159.8(3) . . . . ?
C43B Nb2B C41B C46B -158.8(3) . . . . ?
C40B Nb2B C41B C46B 122.1(3) . . . . ?
C42B Nb2B C41B C46B -122.5(3) . . . . ?
Nb1B Nb2B C41B C46B -155.58(19) . . . . ?
C40B C41B C42B C43B -1.4(3) . . . . ?
C46B C41B C42B C43B -177.7(2) . . . . ?
Nb2B C41B C42B C43B 62.93(16) . . . . ?
C40B C41B C42B C47B 176.1(2) . . . . ?
C46B C41B C42B C47B -0.2(4) . . . . ?
Nb2B C41B C42B C47B -119.5(3) . . . . ?
C40B C41B C42B Nb2B -64.32(15) . . . . ?
C46B C41B C42B Nb2B 119.4(2) . . . . ?
N2B Nb2B C42B C43B -19.6(3) . . . . ?
N1B Nb2B C42B C43B 70.37(16) . . . . ?
N32B Nb2B C42B C43B 160.42(16) . . . . ?
N31B Nb2B C42B C43B -145.68(15) . . . . ?
C44B Nb2B C42B C43B -38.01(15) . . . . ?
C40B Nb2B C42B C43B -79.43(17) . . . . ?
C41B Nb2B C42B C43B -116.4(2) . . . . ?
Nb1B Nb2B C42B C43B 51.58(18) . . . . ?
N2B Nb2B C42B C41B 96.8(2) . . . . ?
N1B Nb2B C42B C41B -173.20(16) . . . . ?
N32B Nb2B C42B C41B -83.15(16) . . . . ?
N31B Nb2B C42B C41B -29.24(17) . . . . ?
C44B Nb2B C42B C41B 78.43(17) . . . . ?
C43B Nb2B C42B C41B 116.4(2) . . . . ?
C40B Nb2B C42B C41B 37.00(15) . . . . ?
Nb1B Nb2B C42B C41B 168.01(12) . . . . ?
N2B Nb2B C42B C47B -138.8(3) . . . . ?
N1B Nb2B C42B C47B -48.8(3) . . . . ?
N32B Nb2B C42B C47B 41.3(3) . . . . ?
N31B Nb2B C42B C47B 95.2(3) . . . . ?
C44B Nb2B C42B C47B -157.2(3) . . . . ?
C43B Nb2B C42B C47B -119.2(3) . . . . ?
C40B Nb2B C42B C47B 161.4(3) . . . . ?
C41B Nb2B C42B C47B 124.4(3) . . . . ?
Nb1B Nb2B C42B C47B -67.6(3) . . . . ?
C41B C42B C43B C44B 0.0(3) . . . . ?
C47B C42B C43B C44B -177.6(2) . . . . ?
Nb2B C42B C43B C44B 65.06(15) . . . . ?
C41B C42B C43B C48B 174.5(2) . . . . ?
C47B C42B C43B C48B -3.1(4) . . . . ?
Nb2B C42B C43B C48B -120.4(2) . . . . ?
C41B C42B C43B Nb2B -65.05(16) . . . . ?
C47B C42B C43B Nb2B 117.3(2) . . . . ?
N2B Nb2B C43B C42B 170.24(14) . . . . ?
N1B Nb2B C43B C42B -110.08(16) . . . . ?
N32B Nb2B C43B C42B -21.71(18) . . . . ?
N31B Nb2B C43B C42B 46.3(2) . . . . ?
C44B Nb2B C43B C42B 114.4(2) . . . . ?
C40B Nb2B C43B C42B 75.93(16) . . . . ?
C41B Nb2B C43B C42B 35.77(14) . . . . ?
Nb1B Nb2B C43B C42B -143.30(14) . . . . ?
N2B Nb2B C43B C44B 55.79(18) . . . . ?
N1B Nb2B C43B C44B 135.47(16) . . . . ?
N32B Nb2B C43B C44B -136.16(15) . . . . ?
N31B Nb2B C43B C44B -68.12(19) . . . . ?
C40B Nb2B C43B C44B -38.52(14) . . . . ?
C41B Nb2B C43B C44B -78.68(16) . . . . ?
C42B Nb2B C43B C44B -114.4(2) . . . . ?
Nb1B Nb2B C43B C44B 102.25(14) . . . . ?
N2B Nb2B C43B C48B -67.7(3) . . . . ?
N1B Nb2B C43B C48B 12.0(3) . . . . ?
N32B Nb2B C43B C48B 100.3(3) . . . . ?
N31B Nb2B C43B C48B 168.4(2) . . . . ?
C44B Nb2B C43B C48B -123.5(3) . . . . ?
C40B Nb2B C43B C48B -162.0(3) . . . . ?
C41B Nb2B C43B C48B 157.8(3) . . . . ?
C42B Nb2B C43B C48B 122.1(3) . . . . ?
Nb1B Nb2B C43B C48B -21.2(3) . . . . ?
C42B C43B C44B C40B 1.4(3) . . . . ?
C48B C43B C44B C40B -172.9(2) . . . . ?
Nb2B C43B C44B C40B 70.68(15) . . . . ?
C42B C43B C44B C49B 168.1(2) . . . . ?
C48B C43B C44B C49B -6.2(4) . . . . ?
Nb2B C43B C44B C49B -122.6(2) . . . . ?
C42B C43B C44B Nb2B -69.32(16) . . . . ?
C48B C43B C44B Nb2B 116.5(2) . . . . ?
C41B C40B C44B C43B -2.2(2) . . . . ?
C45B C40B C44B C43B 169.3(2) . . . . ?
Nb2B C40B C44B C43B -70.27(15) . . . . ?
C41B C40B C44B C49B -169.3(2) . . . . ?
C45B C40B C44B C49B 2.2(4) . . . . ?
Nb2B C40B C44B C49B 122.6(2) . . . . ?
C41B C40B C44B Nb2B 68.06(16) . . . . ?
C45B C40B C44B Nb2B -120.4(2) . . . . ?
N2B Nb2B C44B C43B -135.67(15) . . . . ?
N1B Nb2B C44B C43B -47.48(16) . . . . ?
N32B Nb2B C44B C43B 63.33(19) . . . . ?
N31B Nb2B C44B C43B 130.79(15) . . . . ?
C40B Nb2B C44B C43B 112.4(2) . . . . ?
C41B Nb2B C44B C43B 75.81(16) . . . . ?
C42B Nb2B C44B C43B 36.59(14) . . . . ?
Nb1B Nb2B C44B C43B -92.14(15) . . . . ?
N2B Nb2B C44B C40B 111.95(16) . . . . ?
N1B Nb2B C44B C40B -159.86(15) . . . . ?
N32B Nb2B C44B C40B -49.0(2) . . . . ?
N31B Nb2B C44B C40B 18.41(18) . . . . ?
C43B Nb2B C44B C40B -112.4(2) . . . . ?
C41B Nb2B C44B C40B -36.57(15) . . . . ?
C42B Nb2B C44B C40B -75.79(16) . . . . ?
Nb1B Nb2B C44B C40B 155.48(13) . . . . ?
N2B Nb2B C44B C49B -10.6(3) . . . . ?
N1B Nb2B C44B C49B 77.6(3) . . . . ?
N32B Nb2B C44B C49B -171.6(2) . . . . ?
N31B Nb2B C44B C49B -104.1(3) . . . . ?
C43B Nb2B C44B C49B 125.1(3) . . . . ?
C40B Nb2B C44B C49B -122.5(3) . . . . ?
C41B Nb2B C44B C49B -159.1(3) . . . . ?
C42B Nb2B C44B C49B 161.7(3) . . . . ?
Nb1B Nb2B C44B C49B 33.0(3) . . . . ?

_diffrn_measured_fraction_theta_max    0.999
_diffrn_reflns_theta_full              27.50
_diffrn_measured_fraction_theta_full   0.999
_refine_diff_density_max    0.402
_refine_diff_density_min   -0.294
_refine_diff_density_rms    0.061
 
_diffrn_orient_matrix_type            standard
_diffrn_orient_matrix_UB_11           0.0133929
_diffrn_orient_matrix_UB_12          -0.0496156
_diffrn_orient_matrix_UB_13           0.0010110
_diffrn_orient_matrix_UB_21           0.0141401
_diffrn_orient_matrix_UB_22           0.0251660
_diffrn_orient_matrix_UB_23           0.0568635
_diffrn_orient_matrix_UB_31          -0.0842014
_diffrn_orient_matrix_UB_32          -0.0183732
_diffrn_orient_matrix_UB_33           0.0032278
_symmetry_space_group_name_Hall       '-P 1'
_exptl_crystal_id                     'Sita/Keane AK-347A @RT'

_diffrn_measurement_details           366,366,366,720

_diffrn_source_voltage                50.00
_diffrn_source_current                30.00

_diffrn_measurement_specimen_support  'MiTeGen loop'
_diffrn_detector                      'CCD area detector'
_diffrn_detector_type                 'Bruker Smart Apex II'
_diffrn_standards_decay_%             0

#_______________________________________________________________________________
#
_publ_section_references
;
Bruker (2010). Apex2. Bruker AXS Inc., Madison, Wisconsin, USA.

Sheldrick, G. M. (2008). Acta Cryst. A64, 112-122.

Spek, A. L. (1990). Acta Cryst., A46, C-34.
;
data_cmpd_trans_4b

_audit_creation_method            'SHELXL-2012 & ZCIF'
_chemical_name_systematic
;
cmpd_trans_4b
;
_chemical_name_common             cmpd_trans_4b
_chemical_formula_moiety          'C46 H68 N6 Nb2'
_chemical_formula_sum             'C46 H68 N6 Nb2'
_chemical_formula_weight          890.88

loop_
 _atom_type_symbol
 _atom_type_description
 _atom_type_scat_dispersion_real
 _atom_type_scat_dispersion_imag
 _atom_type_scat_source
 'C'  'C'   0.0033   0.0016
 'International Tables Vol C Tables 4.2.6.8 and 6.1.1.4'
 'H'  'H'   0.0000   0.0000
 'International Tables Vol C Tables 4.2.6.8 and 6.1.1.4'
 'N'  'N'   0.0061   0.0033
 'International Tables Vol C Tables 4.2.6.8 and 6.1.1.4'
 'Nb'  'Nb'  -2.0727   0.6215
 'International Tables Vol C Tables 4.2.6.8 and 6.1.1.4'

_space_group_crystal_system       orthorhombic
_space_group_IT_number            61
_space_group_name_H-M_alt         'P b c a'
_space_group_name_Hall            '-P 2ac 2ab'

_shelx_space_group_comment
;
The symmetry employed for this shelxl refinement is uniquely defined
by the following loop, which should always be used as a source of
symmetry information in preference to the above space-group names.
They are only intended as comments.
;

loop_
 _space_group_symop_operation_xyz
 'x, y, z'
 '-x+1/2, -y, z+1/2'
 '-x, y+1/2, -z+1/2'
 'x+1/2, -y+1/2, -z'
 '-x, -y, -z'
 'x-1/2, y, -z-1/2'
 'x, -y-1/2, z-1/2'
 '-x-1/2, y-1/2, z'

_cell_length_a                    16.5274(18)
_cell_length_b                    15.3353(17)
_cell_length_c                    17.1720(19)
_cell_angle_alpha                 90
_cell_angle_beta                  90
_cell_angle_gamma                 90
_cell_volume                      4352.3(8)
_cell_formula_units_Z             4
_cell_measurement_temperature     150(2)
_cell_measurement_reflns_used     14221
_cell_measurement_theta_min       2.2
_cell_measurement_theta_max       31.8

_exptl_crystal_description        prism
_exptl_crystal_colour             orange
_exptl_crystal_density_meas       ?
_exptl_crystal_density_method     'not measured'
_exptl_crystal_density_diffrn     1.360
_exptl_crystal_F_000              1872
_exptl_transmission_factor_min    ?
_exptl_transmission_factor_max    ?
_exptl_crystal_size_max           0.28
_exptl_crystal_size_mid           0.26
_exptl_crystal_size_min           0.21
_exptl_absorpt_coefficient_mu     0.565
_shelx_estimated_absorpt_T_min    0.858
_shelx_estimated_absorpt_T_max    0.891
_exptl_absorpt_correction_type    multi-scan
_exptl_absorpt_correction_T_min   0.809
_exptl_absorpt_correction_T_max   0.888
_exptl_absorpt_process_details    'SADABS (Sheldrick, 2008)'

_diffrn_ambient_temperature       150(2)
_diffrn_radiation_wavelength      0.71073
_diffrn_radiation_type            MoK\a
_diffrn_source                    'sealed tube'
_diffrn_measurement_device_type   'Bruker Smart Apex II diffractometer'
_diffrn_measurement_method        '\f and \w scans'
_diffrn_detector_area_resol_mean  8.333
_diffrn_reflns_number             48682
_diffrn_reflns_av_unetI/netI      0.0241
_diffrn_reflns_av_R_equivalents   0.0410
_diffrn_reflns_limit_h_min        -23
_diffrn_reflns_limit_h_max        23
_diffrn_reflns_limit_k_min        -21
_diffrn_reflns_limit_k_max        21
_diffrn_reflns_limit_l_min        -24
_diffrn_reflns_limit_l_max        24
_diffrn_reflns_theta_min          2.165
_diffrn_reflns_theta_max          29.998
_diffrn_reflns_theta_full         25.000
_diffrn_measured_fraction_theta_max   1.000
_diffrn_measured_fraction_theta_full  1.000
_diffrn_reflns_Laue_measured_fraction_max    1.000
_diffrn_reflns_Laue_measured_fraction_full   1.000
_diffrn_reflns_point_group_measured_fraction_max   1.000
_diffrn_reflns_point_group_measured_fraction_full  1.000
_reflns_number_total              6351
_reflns_number_gt                 5334
_reflns_threshold_expression      'I > 2\s(I)'
_reflns_Friedel_coverage          0.000
_reflns_Friedel_fraction_max      .
_reflns_Friedel_fraction_full     .

_reflns_special_details
;
 Reflections were merged by SHELXL according to the crystal
 class for the calculation of statistics and refinement.

 _reflns_Friedel_fraction is defined as the number of unique
 Friedel pairs measured divided by the number that would be
 possible theoretically, ignoring centric projections and
 systematic absences.
;

_computing_data_collection        'Apex2 (Bruker, 2010)'
_computing_cell_refinement        Apex2
_computing_data_reduction         'Apex2, Saint'
_computing_structure_solution     'ShelXS-97 (Sheldrick, 2008)'
_computing_structure_refinement   'ShelXL-2012 (Sheldrick, 2012)'
_computing_molecular_graphics     'XSHEL (Bruker, 2004)'
_computing_publication_material   'Apex2, SHELXL-2012'

_refine_special_details
;
H atoms were positioned from geometric considerations and refined
as riding on the atatched atoms with Uiso refined but constrained
to be the same within CH3 group.
;
_refine_ls_structure_factor_coef  Fsqd
_refine_ls_matrix_type            full
_refine_ls_weighting_scheme       calc
_refine_ls_weighting_details
;
 w=1/[\s^2^(Fo^2^)+(0.0100P)^2^+3.8300P]
 where P=(Fo^2^+2Fc^2^)/3
;
_atom_sites_solution_primary      direct
_atom_sites_solution_secondary    difmap
_atom_sites_solution_hydrogens    geom
_refine_ls_hydrogen_treatment     refU
_refine_ls_extinction_method      none
_refine_ls_extinction_coef        .
_refine_ls_number_reflns          6351
_refine_ls_number_parameters      269
_refine_ls_number_restraints      0
_refine_ls_R_factor_all           0.0311
_refine_ls_R_factor_gt            0.0234
_refine_ls_wR_factor_ref          0.0533
_refine_ls_wR_factor_gt           0.0496
_refine_ls_goodness_of_fit_ref    1.000
_refine_ls_restrained_S_all       1.000
_refine_ls_shift/su_max           0.001
_refine_ls_shift/su_mean          0.000

loop_
 _atom_site_label
 _atom_site_type_symbol
 _atom_site_fract_x
 _atom_site_fract_y
 _atom_site_fract_z
 _atom_site_U_iso_or_equiv
 _atom_site_adp_type
 _atom_site_occupancy
 _atom_site_site_symmetry_order
 _atom_site_calc_flag
 _atom_site_refinement_flags_posn
 _atom_site_refinement_flags_adp
 _atom_site_refinement_flags_occupancy
 _atom_site_disorder_assembly
 _atom_site_disorder_group
Nb1 Nb 0.53898(2) 0.43429(2) 0.45768(2) 0.01413(3) Uani 1 1 d . . . . .
N1 N 0.43197(7) 0.46061(8) 0.48848(7) 0.0187(2) Uani 1 1 d . . . . .
C1 C 0.55863(8) 0.43926(9) 0.29996(8) 0.0173(3) Uani 1 1 d . . . . .
C2 C 0.57730(9) 0.43305(10) 0.21439(8) 0.0200(3) Uani 1 1 d . . . . .
C3 C 0.62541(9) 0.36509(10) 0.18721(9) 0.0249(3) Uani 1 1 d . . . . .
H3 H 0.6443 0.3217 0.2223 0.025(5) Uiso 1 1 calc R . . . .
C4 C 0.64595(11) 0.36051(12) 0.10857(10) 0.0336(4) Uani 1 1 d . . . . .
H4 H 0.6788 0.3141 0.0902 0.042(6) Uiso 1 1 calc R . . . .
C5 C 0.61852(12) 0.42349(13) 0.05734(10) 0.0387(5) Uani 1 1 d . . . . .
H5 H 0.6325 0.4202 0.0038 0.044(6) Uiso 1 1 calc R . . . .
C6 C 0.57098(13) 0.49097(13) 0.08376(10) 0.0374(4) Uani 1 1 d . . . . .
H6 H 0.5523 0.5341 0.0484 0.044(6) Uiso 1 1 calc R . . . .
C7 C 0.55021(11) 0.49619(11) 0.16219(9) 0.0283(3) Uani 1 1 d . . . . .
H7 H 0.5175 0.5430 0.1802 0.028(5) Uiso 1 1 calc R . . . .
N11 N 0.49487(7) 0.40336(8) 0.33417(7) 0.0191(2) Uani 1 1 d . . . . .
C12 C 0.42893(9) 0.36058(10) 0.29114(9) 0.0235(3) Uani 1 1 d . . . . .
H12 H 0.4529 0.3193 0.2524 0.025(5) Uiso 1 1 calc R . . . .
C13 C 0.37592(10) 0.30926(12) 0.34726(10) 0.0345(4) Uani 1 1 d . . . . .
H13A H 0.4082 0.2636 0.3723 0.050(4) Uiso 1 1 calc R . . . .
H13B H 0.3311 0.2825 0.3186 0.050(4) Uiso 1 1 calc R . . . .
H13C H 0.3543 0.3486 0.3871 0.050(4) Uiso 1 1 calc R . . . .
C14 C 0.37504(12) 0.42537(13) 0.24829(13) 0.0452(5) Uani 1 1 d . . . . .
H14A H 0.3486 0.4639 0.2861 0.063(4) Uiso 1 1 calc R . . . .
H14B H 0.3338 0.3936 0.2187 0.063(4) Uiso 1 1 calc R . . . .
H14C H 0.4080 0.4603 0.2126 0.063(4) Uiso 1 1 calc R . . . .
N15 N 0.60659(7) 0.48016(8) 0.35018(7) 0.0188(2) Uani 1 1 d . . . . .
C16 C 0.68100(9) 0.52520(10) 0.32588(8) 0.0209(3) Uani 1 1 d . . . . .
H16 H 0.7088 0.4886 0.2858 0.021(4) Uiso 1 1 calc R . . . .
C17 C 0.73739(10) 0.53579(11) 0.39515(9) 0.0282(3) Uani 1 1 d . . . . .
H17A H 0.7107 0.5709 0.4353 0.038(3) Uiso 1 1 calc R . . . .
H17B H 0.7871 0.5651 0.3784 0.038(3) Uiso 1 1 calc R . . . .
H17C H 0.7507 0.4783 0.4164 0.038(3) Uiso 1 1 calc R . . . .
C18 C 0.66496(11) 0.61532(11) 0.29076(10) 0.0300(3) Uani 1 1 d . . . . .
H18A H 0.6288 0.6095 0.2458 0.038(3) Uiso 1 1 calc R . . . .
H18B H 0.7162 0.6413 0.2740 0.038(3) Uiso 1 1 calc R . . . .
H18C H 0.6395 0.6528 0.3300 0.038(3) Uiso 1 1 calc R . . . .
C20 C 0.57431(9) 0.34254(9) 0.56732(8) 0.0192(3) Uani 1 1 d . . . . .
C21 C 0.65169(9) 0.35904(9) 0.53294(8) 0.0198(3) Uani 1 1 d . . . . .
C22 C 0.65382(9) 0.31613(9) 0.46038(8) 0.0199(3) Uani 1 1 d . . . . .
C23 C 0.57876(9) 0.27099(9) 0.44995(8) 0.0194(3) Uani 1 1 d . . . . .
C24 C 0.53028(9) 0.28583(9) 0.51673(8) 0.0192(3) Uani 1 1 d . . . . .
C25 C 0.55132(10) 0.36565(10) 0.64958(9) 0.0261(3) Uani 1 1 d . . . . .
H25A H 0.5777 0.4204 0.6644 0.079(5) Uiso 1 1 calc R . . . .
H25B H 0.5688 0.3191 0.6848 0.079(5) Uiso 1 1 calc R . . . .
H25C H 0.4925 0.3725 0.6531 0.079(5) Uiso 1 1 calc R . . . .
C26 C 0.71844(10) 0.40931(11) 0.57192(10) 0.0288(3) Uani 1 1 d . . . . .
H26A H 0.7027 0.4707 0.5764 0.048(4) Uiso 1 1 calc R . . . .
H26B H 0.7680 0.4047 0.5408 0.048(4) Uiso 1 1 calc R . . . .
H26C H 0.7281 0.3853 0.6240 0.048(4) Uiso 1 1 calc R . . . .
C27 C 0.72452(10) 0.30648(11) 0.40590(10) 0.0282(3) Uani 1 1 d . . . . .
H27A H 0.7355 0.2444 0.3973 0.043(3) Uiso 1 1 calc R . . . .
H27B H 0.7723 0.3343 0.4288 0.043(3) Uiso 1 1 calc R . . . .
H27C H 0.7118 0.3344 0.3561 0.043(3) Uiso 1 1 calc R . . . .
C28 C 0.56258(10) 0.20971(10) 0.38344(9) 0.0264(3) Uani 1 1 d . . . . .
H28A H 0.5116 0.1787 0.3927 0.050(4) Uiso 1 1 calc R . . . .
H28B H 0.6069 0.1675 0.3794 0.050(4) Uiso 1 1 calc R . . . .
H28C H 0.5586 0.2430 0.3349 0.050(4) Uiso 1 1 calc R . . . .
C29 C 0.45062(9) 0.24437(10) 0.53687(9) 0.0267(3) Uani 1 1 d . . . . .
H29A H 0.4354 0.2030 0.4959 0.047(4) Uiso 1 1 calc R . . . .
H29B H 0.4090 0.2896 0.5412 0.047(4) Uiso 1 1 calc R . . . .
H29C H 0.4555 0.2135 0.5866 0.047(4) Uiso 1 1 calc R . . . .

loop_
 _atom_site_aniso_label
 _atom_site_aniso_U_11
 _atom_site_aniso_U_22
 _atom_site_aniso_U_33
 _atom_site_aniso_U_23
 _atom_site_aniso_U_13
 _atom_site_aniso_U_12
Nb1 0.01546(6) 0.01345(6) 0.01349(6) -0.00089(4) 0.00039(4) 0.00190(4)
N1 0.0163(5) 0.0191(6) 0.0206(6) -0.0045(5) 0.0010(4) -0.0009(4)
C1 0.0196(6) 0.0164(6) 0.0159(6) -0.0010(5) -0.0013(5) 0.0041(5)
C2 0.0219(7) 0.0223(7) 0.0157(6) -0.0033(5) 0.0001(5) -0.0033(6)
C3 0.0241(7) 0.0242(7) 0.0263(7) -0.0073(6) 0.0028(6) -0.0022(6)
C4 0.0306(9) 0.0371(9) 0.0330(9) -0.0178(7) 0.0122(7) -0.0113(7)
C5 0.0479(11) 0.0488(11) 0.0193(7) -0.0096(7) 0.0090(7) -0.0255(9)
C6 0.0547(11) 0.0390(10) 0.0186(7) 0.0038(7) -0.0058(7) -0.0136(9)
C7 0.0388(9) 0.0273(8) 0.0186(7) 0.0005(6) -0.0043(6) 0.0001(7)
N11 0.0170(6) 0.0240(6) 0.0164(5) -0.0030(5) -0.0019(4) -0.0011(5)
C12 0.0202(7) 0.0271(7) 0.0232(7) -0.0072(6) -0.0036(6) -0.0005(6)
C13 0.0248(8) 0.0426(10) 0.0362(9) -0.0037(8) -0.0018(7) -0.0112(7)
C14 0.0307(9) 0.0468(11) 0.0582(12) 0.0091(10) -0.0232(9) -0.0054(8)
N15 0.0201(6) 0.0210(6) 0.0152(5) -0.0004(4) 0.0003(4) -0.0031(5)
C16 0.0211(7) 0.0217(7) 0.0199(7) -0.0018(5) 0.0018(5) -0.0035(6)
C17 0.0239(8) 0.0310(8) 0.0297(8) 0.0021(6) -0.0049(6) -0.0086(6)
C18 0.0342(9) 0.0270(8) 0.0290(8) 0.0048(6) -0.0014(7) -0.0080(7)
C20 0.0228(7) 0.0172(6) 0.0177(6) 0.0023(5) 0.0002(5) 0.0038(5)
C21 0.0198(6) 0.0184(6) 0.0211(7) 0.0028(5) -0.0020(5) 0.0037(5)
C22 0.0209(6) 0.0180(6) 0.0210(6) 0.0034(5) 0.0023(5) 0.0055(5)
C23 0.0239(7) 0.0134(6) 0.0211(7) 0.0012(5) 0.0015(6) 0.0040(5)
C24 0.0222(7) 0.0148(6) 0.0207(6) 0.0023(5) 0.0021(5) 0.0022(5)
C25 0.0340(9) 0.0260(8) 0.0182(7) -0.0001(6) 0.0019(6) 0.0054(6)
C26 0.0252(8) 0.0332(9) 0.0279(8) 0.0017(7) -0.0058(6) -0.0002(6)
C27 0.0246(7) 0.0276(8) 0.0325(8) 0.0007(7) 0.0083(6) 0.0069(6)
C28 0.0344(8) 0.0186(7) 0.0262(8) -0.0053(6) 0.0017(6) 0.0039(6)
C29 0.0287(8) 0.0234(7) 0.0281(8) 0.0012(6) 0.0055(6) -0.0055(6)

_geom_special_details
;
 All esds (except the esd in the dihedral angle between two l.s. planes)
 are estimated using the full covariance matrix.  The cell esds are taken
 into account individually in the estimation of esds in distances, angles
 and torsion angles; correlations between esds in cell parameters are only
 used when they are defined by crystal symmetry.  An approximate (isotropic)
 treatment of cell esds is used for estimating esds involving l.s. planes.
;

loop_
 _geom_bond_atom_site_label_1
 _geom_bond_atom_site_label_2
 _geom_bond_distance
 _geom_bond_site_symmetry_2
 _geom_bond_publ_flag
Nb1 N1 1.8895(12) . ?
Nb1 N1 1.9192(12) 5_666 ?
Nb1 N15 2.2696(12) . ?
Nb1 N11 2.2922(12) . ?
Nb1 C20 2.4220(14) . ?
Nb1 C24 2.4965(14) . ?
Nb1 C21 2.5440(14) . ?
Nb1 C23 2.5926(14) . ?
Nb1 C22 2.6246(14) . ?
Nb1 Nb1 2.7990(3) 5_666 ?
N1 Nb1 1.9192(12) 5_666 ?
C1 N11 1.3262(18) . ?
C1 N15 1.3286(17) . ?
C1 C2 1.5045(19) . ?
C2 C3 1.391(2) . ?
C2 C7 1.393(2) . ?
C3 C4 1.394(2) . ?
C3 H3 0.9500 . ?
C4 C5 1.383(3) . ?
C4 H4 0.9500 . ?
C5 C6 1.376(3) . ?
C5 H5 0.9500 . ?
C6 C7 1.392(2) . ?
C6 H6 0.9500 . ?
C7 H7 0.9500 . ?
N11 C12 1.4712(18) . ?
C12 C13 1.522(2) . ?
C12 C14 1.524(2) . ?
C12 H12 1.0000 . ?
C13 H13A 0.9800 . ?
C13 H13B 0.9800 . ?
C13 H13C 0.9800 . ?
C14 H14A 0.9800 . ?
C14 H14B 0.9800 . ?
C14 H14C 0.9800 . ?
N15 C16 1.4710(18) . ?
C16 C17 1.520(2) . ?
C16 C18 1.531(2) . ?
C16 H16 1.0000 . ?
C17 H17A 0.9800 . ?
C17 H17B 0.9800 . ?
C17 H17C 0.9800 . ?
C18 H18A 0.9800 . ?
C18 H18B 0.9800 . ?
C18 H18C 0.9800 . ?
C20 C24 1.428(2) . ?
C20 C21 1.431(2) . ?
C20 C25 1.505(2) . ?
C21 C22 1.410(2) . ?
C21 C26 1.503(2) . ?
C22 C23 1.432(2) . ?
C22 C27 1.504(2) . ?
C23 C24 1.417(2) . ?
C23 C28 1.503(2) . ?
C24 C29 1.502(2) . ?
C25 H25A 0.9800 . ?
C25 H25B 0.9800 . ?
C25 H25C 0.9800 . ?
C26 H26A 0.9800 . ?
C26 H26B 0.9800 . ?
C26 H26C 0.9800 . ?
C27 H27A 0.9800 . ?
C27 H27B 0.9800 . ?
C27 H27C 0.9800 . ?
C28 H28A 0.9800 . ?
C28 H28B 0.9800 . ?
C28 H28C 0.9800 . ?
C29 H29A 0.9800 . ?
C29 H29B 0.9800 . ?
C29 H29C 0.9800 . ?

loop_
 _geom_angle_atom_site_label_1
 _geom_angle_atom_site_label_2
 _geom_angle_atom_site_label_3
 _geom_angle
 _geom_angle_site_symmetry_1
 _geom_angle_site_symmetry_3
 _geom_angle_publ_flag
N1 Nb1 N1 85.41(5) . 5_666 ?
N1 Nb1 N15 128.49(5) . . ?
N1 Nb1 N15 90.48(5) 5_666 . ?
N1 Nb1 N11 90.32(5) . . ?
N1 Nb1 N11 134.36(5) 5_666 . ?
N15 Nb1 N11 57.87(4) . . ?
N1 Nb1 C20 97.59(5) . . ?
N1 Nb1 C20 93.04(5) 5_666 . ?
N15 Nb1 C20 133.92(5) . . ?
N11 Nb1 C20 132.51(5) . . ?
N1 Nb1 C24 91.56(5) . . ?
N1 Nb1 C24 125.77(5) 5_666 . ?
N15 Nb1 C24 129.89(4) . . ?
N11 Nb1 C24 99.72(5) . . ?
C20 Nb1 C24 33.72(5) . . ?
N1 Nb1 C21 129.80(5) . . ?
N1 Nb1 C21 87.30(5) 5_666 . ?
N15 Nb1 C21 101.14(5) . . ?
N11 Nb1 C21 127.52(5) . . ?
C20 Nb1 C21 33.39(5) . . ?
C24 Nb1 C21 54.70(5) . . ?
N1 Nb1 C23 117.26(5) . . ?
N1 Nb1 C23 140.57(5) 5_666 . ?
N15 Nb1 C23 97.63(4) . . ?
N11 Nb1 C23 80.41(4) . . ?
C20 Nb1 C23 54.37(5) . . ?
C24 Nb1 C23 32.27(4) . . ?
C21 Nb1 C23 53.28(5) . . ?
N1 Nb1 C22 145.03(5) . . ?
N1 Nb1 C22 112.97(5) 5_666 . ?
N15 Nb1 C22 82.66(4) . . ?
N11 Nb1 C22 95.94(4) . . ?
C20 Nb1 C22 53.90(5) . . ?
C24 Nb1 C22 53.48(5) . . ?
C21 Nb1 C22 31.60(4) . . ?
C23 Nb1 C22 31.85(5) . . ?
N1 Nb1 Nb1 43.12(4) . 5_666 ?
N1 Nb1 Nb1 42.29(4) 5_666 5_666 ?
N15 Nb1 Nb1 115.20(3) . 5_666 ?
N11 Nb1 Nb1 118.89(3) . 5_666 ?
C20 Nb1 Nb1 97.21(3) . 5_666 ?
C24 Nb1 Nb1 114.79(3) . 5_666 ?
C21 Nb1 Nb1 113.57(3) . 5_666 ?
C23 Nb1 Nb1 147.02(3) . 5_666 ?
C22 Nb1 Nb1 145.17(3) . 5_666 ?
Nb1 N1 Nb1 94.59(5) . 5_666 ?
N11 C1 N15 112.49(12) . . ?
N11 C1 C2 124.70(12) . . ?
N15 C1 C2 122.78(13) . . ?
C3 C2 C7 119.23(14) . . ?
C3 C2 C1 119.49(13) . . ?
C7 C2 C1 121.22(13) . . ?
C2 C3 C4 120.12(16) . . ?
C2 C3 H3 119.9 . . ?
C4 C3 H3 119.9 . . ?
C5 C4 C3 120.07(16) . . ?
C5 C4 H4 120.0 . . ?
C3 C4 H4 120.0 . . ?
C6 C5 C4 120.18(15) . . ?
C6 C5 H5 119.9 . . ?
C4 C5 H5 119.9 . . ?
C5 C6 C7 120.19(17) . . ?
C5 C6 H6 119.9 . . ?
C7 C6 H6 119.9 . . ?
C6 C7 C2 120.20(16) . . ?
C6 C7 H7 119.9 . . ?
C2 C7 H7 119.9 . . ?
C1 N11 C12 123.45(12) . . ?
C1 N11 Nb1 94.09(8) . . ?
C12 N11 Nb1 142.43(10) . . ?
N11 C12 C13 109.81(12) . . ?
N11 C12 C14 112.63(13) . . ?
C13 C12 C14 107.85(14) . . ?
N11 C12 H12 108.8 . . ?
C13 C12 H12 108.8 . . ?
C14 C12 H12 108.8 . . ?
C12 C13 H13A 109.5 . . ?
C12 C13 H13B 109.5 . . ?
H13A C13 H13B 109.5 . . ?
C12 C13 H13C 109.5 . . ?
H13A C13 H13C 109.5 . . ?
H13B C13 H13C 109.5 . . ?
C12 C14 H14A 109.5 . . ?
C12 C14 H14B 109.5 . . ?
H14A C14 H14B 109.5 . . ?
C12 C14 H14C 109.5 . . ?
H14A C14 H14C 109.5 . . ?
H14B C14 H14C 109.5 . . ?
C1 N15 C16 122.43(12) . . ?
C1 N15 Nb1 95.04(9) . . ?
C16 N15 Nb1 141.99(9) . . ?
N15 C16 C17 109.92(12) . . ?
N15 C16 C18 113.00(13) . . ?
C17 C16 C18 108.55(13) . . ?
N15 C16 H16 108.4 . . ?
C17 C16 H16 108.4 . . ?
C18 C16 H16 108.4 . . ?
C16 C17 H17A 109.5 . . ?
C16 C17 H17B 109.5 . . ?
H17A C17 H17B 109.5 . . ?
C16 C17 H17C 109.5 . . ?
H17A C17 H17C 109.5 . . ?
H17B C17 H17C 109.5 . . ?
C16 C18 H18A 109.5 . . ?
C16 C18 H18B 109.5 . . ?
H18A C18 H18B 109.5 . . ?
C16 C18 H18C 109.5 . . ?
H18A C18 H18C 109.5 . . ?
H18B C18 H18C 109.5 . . ?
C24 C20 C21 108.18(12) . . ?
C24 C20 C25 125.85(13) . . ?
C21 C20 C25 124.83(13) . . ?
C24 C20 Nb1 76.00(8) . . ?
C21 C20 Nb1 77.99(8) . . ?
C25 C20 Nb1 122.13(10) . . ?
C22 C21 C20 107.73(13) . . ?
C22 C21 C26 127.93(14) . . ?
C20 C21 C26 124.25(13) . . ?
C22 C21 Nb1 77.35(8) . . ?
C20 C21 Nb1 68.62(8) . . ?
C26 C21 Nb1 122.08(10) . . ?
C21 C22 C23 108.33(12) . . ?
C21 C22 C27 127.96(14) . . ?
C23 C22 C27 123.21(13) . . ?
C21 C22 Nb1 71.05(8) . . ?
C23 C22 Nb1 72.84(8) . . ?
C27 C22 Nb1 128.23(10) . . ?
C24 C23 C22 108.12(12) . . ?
C24 C23 C28 127.92(14) . . ?
C22 C23 C28 123.47(13) . . ?
C24 C23 Nb1 70.13(8) . . ?
C22 C23 Nb1 75.31(8) . . ?
C28 C23 Nb1 126.70(10) . . ?
C23 C24 C20 107.57(13) . . ?
C23 C24 C29 127.86(14) . . ?
C20 C24 C29 124.33(13) . . ?
C23 C24 Nb1 77.60(8) . . ?
C20 C24 Nb1 70.28(8) . . ?
C29 C24 Nb1 122.00(10) . . ?
C20 C25 H25A 109.5 . . ?
C20 C25 H25B 109.5 . . ?
H25A C25 H25B 109.5 . . ?
C20 C25 H25C 109.5 . . ?
H25A C25 H25C 109.5 . . ?
H25B C25 H25C 109.5 . . ?
C21 C26 H26A 109.5 . . ?
C21 C26 H26B 109.5 . . ?
H26A C26 H26B 109.5 . . ?
C21 C26 H26C 109.5 . . ?
H26A C26 H26C 109.5 . . ?
H26B C26 H26C 109.5 . . ?
C22 C27 H27A 109.5 . . ?
C22 C27 H27B 109.5 . . ?
H27A C27 H27B 109.5 . . ?
C22 C27 H27C 109.5 . . ?
H27A C27 H27C 109.5 . . ?
H27B C27 H27C 109.5 . . ?
C23 C28 H28A 109.5 . . ?
C23 C28 H28B 109.5 . . ?
H28A C28 H28B 109.5 . . ?
C23 C28 H28C 109.5 . . ?
H28A C28 H28C 109.5 . . ?
H28B C28 H28C 109.5 . . ?
C24 C29 H29A 109.5 . . ?
C24 C29 H29B 109.5 . . ?
H29A C29 H29B 109.5 . . ?
C24 C29 H29C 109.5 . . ?
H29A C29 H29C 109.5 . . ?
H29B C29 H29C 109.5 . . ?

loop_
 _geom_torsion_atom_site_label_1
 _geom_torsion_atom_site_label_2
 _geom_torsion_atom_site_label_3
 _geom_torsion_atom_site_label_4
 _geom_torsion
 _geom_torsion_site_symmetry_1
 _geom_torsion_site_symmetry_2
 _geom_torsion_site_symmetry_3
 _geom_torsion_site_symmetry_4
 _geom_torsion_publ_flag
N1 Nb1 N1 Nb1 0.002(0) 5_666 . . 5_666 ?
N15 Nb1 N1 Nb1 -86.95(6) . . . 5_666 ?
N11 Nb1 N1 Nb1 -134.50(5) . . . 5_666 ?
C20 Nb1 N1 Nb1 92.47(5) . . . 5_666 ?
C24 Nb1 N1 Nb1 125.77(5) . . . 5_666 ?
C21 Nb1 N1 Nb1 82.63(7) . . . 5_666 ?
C23 Nb1 N1 Nb1 146.13(5) . . . 5_666 ?
C22 Nb1 N1 Nb1 124.64(7) . . . 5_666 ?
N11 C1 C2 C3 -90.92(18) . . . . ?
N15 C1 C2 C3 87.17(18) . . . . ?
N11 C1 C2 C7 91.87(19) . . . . ?
N15 C1 C2 C7 -90.04(18) . . . . ?
C7 C2 C3 C4 -0.1(2) . . . . ?
C1 C2 C3 C4 -177.37(14) . . . . ?
C2 C3 C4 C5 0.0(2) . . . . ?
C3 C4 C5 C6 0.1(3) . . . . ?
C4 C5 C6 C7 0.0(3) . . . . ?
C5 C6 C7 C2 -0.1(3) . . . . ?
C3 C2 C7 C6 0.2(2) . . . . ?
C1 C2 C7 C6 177.39(15) . . . . ?
N15 C1 N11 C12 174.74(13) . . . . ?
C2 C1 N11 C12 -7.0(2) . . . . ?
N15 C1 N11 Nb1 -6.77(12) . . . . ?
C2 C1 N11 Nb1 171.49(12) . . . . ?
C1 N11 C12 C13 167.34(14) . . . . ?
Nb1 N11 C12 C13 -10.2(2) . . . . ?
C1 N11 C12 C14 -72.44(19) . . . . ?
Nb1 N11 C12 C14 110.02(18) . . . . ?
N11 C1 N15 C16 -179.83(12) . . . . ?
C2 C1 N15 C16 1.9(2) . . . . ?
N11 C1 N15 Nb1 6.85(12) . . . . ?
C2 C1 N15 Nb1 -171.45(12) . . . . ?
C1 N15 C16 C17 -159.14(13) . . . . ?
Nb1 N15 C16 C17 10.0(2) . . . . ?
C1 N15 C16 C18 79.43(17) . . . . ?
Nb1 N15 C16 C18 -111.41(15) . . . . ?
C24 C20 C21 C22 2.56(15) . . . . ?
C25 C20 C21 C22 170.88(13) . . . . ?
Nb1 C20 C21 C22 -68.16(10) . . . . ?
C24 C20 C21 C26 -174.23(13) . . . . ?
C25 C20 C21 C26 -5.9(2) . . . . ?
Nb1 C20 C21 C26 115.05(14) . . . . ?
C24 C20 C21 Nb1 70.72(10) . . . . ?
C25 C20 C21 Nb1 -120.96(14) . . . . ?
C20 C21 C22 C23 -1.38(15) . . . . ?
C26 C21 C22 C23 175.25(14) . . . . ?
Nb1 C21 C22 C23 -63.74(10) . . . . ?
C20 C21 C22 C27 -173.46(14) . . . . ?
C26 C21 C22 C27 3.2(2) . . . . ?
Nb1 C21 C22 C27 124.19(15) . . . . ?
C20 C21 C22 Nb1 62.36(9) . . . . ?
C26 C21 C22 Nb1 -121.00(15) . . . . ?
C21 C22 C23 C24 -0.32(16) . . . . ?
C27 C22 C23 C24 172.22(13) . . . . ?
Nb1 C22 C23 C24 -62.90(9) . . . . ?
C21 C22 C23 C28 -172.85(13) . . . . ?
C27 C22 C23 C28 -0.3(2) . . . . ?
Nb1 C22 C23 C28 124.56(13) . . . . ?
C21 C22 C23 Nb1 62.59(10) . . . . ?
C27 C22 C23 Nb1 -124.88(13) . . . . ?
C22 C23 C24 C20 1.89(15) . . . . ?
C28 C23 C24 C20 173.99(14) . . . . ?
Nb1 C23 C24 C20 -64.40(9) . . . . ?
C22 C23 C24 C29 -172.62(14) . . . . ?
C28 C23 C24 C29 -0.5(2) . . . . ?
Nb1 C23 C24 C29 121.08(15) . . . . ?
C22 C23 C24 Nb1 66.29(10) . . . . ?
C28 C23 C24 Nb1 -121.60(14) . . . . ?
C21 C20 C24 C23 -2.75(16) . . . . ?
C25 C20 C24 C23 -170.92(13) . . . . ?
Nb1 C20 C24 C23 69.34(10) . . . . ?
C21 C20 C24 C29 172.01(13) . . . . ?
C25 C20 C24 C29 3.8(2) . . . . ?
Nb1 C20 C24 C29 -115.90(14) . . . . ?
C21 C20 C24 Nb1 -72.09(10) . . . . ?
C25 C20 C24 Nb1 119.74(14) . . . . ?

_refine_diff_density_max    0.365
_refine_diff_density_min   -0.370
_refine_diff_density_rms    0.059

_diffrn_radiation_monochromator       graphite
_symmetry_cell_setting                Orthorhombic
_symmetry_space_group_name_H-M        Pbca
_diffrn_orient_matrix_type            standard
_diffrn_orient_matrix_UB_11          -0.0416863
_diffrn_orient_matrix_UB_12           0.0042596
_diffrn_orient_matrix_UB_13           0.0445990
_diffrn_orient_matrix_UB_21          -0.0392130
_diffrn_orient_matrix_UB_22           0.0347858
_diffrn_orient_matrix_UB_23          -0.0322969
_diffrn_orient_matrix_UB_31          -0.0312533
_diffrn_orient_matrix_UB_32          -0.0493225
_diffrn_orient_matrix_UB_33          -0.0189501
_diffrn_measurement_specimen_support  'MiTeGen loop'
_diffrn_detector                      'CCD area detector'
_iucr_refine_instructions_details     'See _shelx_res_file'
_iucr_refine_reflections_details      'Available on request'
#_______________________________________________________________________________
#
_publ_section_references
;
Bruker (2010). Apex2. Bruker AXS Inc., Madison, Wisconsin, USA.

Sheldrick, G. M. (2008). Acta Cryst. A64, 112-122.

Sheldrick, G. M. (2012). SHELXL-2012. University of G\"ottingen, Germany.
;
data_cmpd5

_audit_creation_method            'SHELXL-2012 & ZCIF'
_chemical_name_systematic
;
cmpd5
;
_chemical_name_common             cmpd5
_chemical_formula_moiety          'C36 H64 N6 V2'
_chemical_formula_sum             'C36 H64 N6 V2'
_chemical_formula_weight          682.81

loop_
 _atom_type_symbol
 _atom_type_description
 _atom_type_scat_dispersion_real
 _atom_type_scat_dispersion_imag
 _atom_type_scat_source
 'C'  'C'   0.0033   0.0016
 'International Tables Vol C Tables 4.2.6.8 and 6.1.1.4'
 'H'  'H'   0.0000   0.0000
 'International Tables Vol C Tables 4.2.6.8 and 6.1.1.4'
 'N'  'N'   0.0061   0.0033
 'International Tables Vol C Tables 4.2.6.8 and 6.1.1.4'
 'V'  'V'   0.3005   0.5294
 'International Tables Vol C Tables 4.2.6.8 and 6.1.1.4'

_space_group_crystal_system       monoclinic
_space_group_IT_number            14
_space_group_name_H-M_alt         'P 21/c'
_space_group_name_Hall            '-P 2ybc'

_shelx_space_group_comment
;
The symmetry employed for this shelxl refinement is uniquely defined
by the following loop, which should always be used as a source of
symmetry information in preference to the above space-group names.
They are only intended as comments.
;

loop_
 _space_group_symop_operation_xyz
 'x, y, z'
 '-x, y+1/2, -z+1/2'
 '-x, -y, -z'
 'x, -y-1/2, z-1/2'

_cell_length_a                    12.5699(5)
_cell_length_b                    10.2174(4)
_cell_length_c                    15.4022(7)
_cell_angle_alpha                 90
_cell_angle_beta                  101.5360(10)
_cell_angle_gamma                 90
_cell_volume                      1938.17(14)
_cell_formula_units_Z             2
_cell_measurement_temperature     150(2)
_cell_measurement_reflns_used     8899
_cell_measurement_theta_min       2.4
_cell_measurement_theta_max       30.5

_exptl_crystal_description        prism
_exptl_crystal_colour             black
_exptl_crystal_density_meas       ?
_exptl_crystal_density_method     'not measured'
_exptl_crystal_density_diffrn     1.170
_exptl_crystal_F_000              736
_exptl_transmission_factor_min    ?
_exptl_transmission_factor_max    ?
_exptl_crystal_size_max           0.24
_exptl_crystal_size_mid           0.20
_exptl_crystal_size_min           0.20
_exptl_absorpt_coefficient_mu     0.513
_shelx_estimated_absorpt_T_min    0.887
_shelx_estimated_absorpt_T_max    0.904
_exptl_absorpt_correction_type    multi-scan
_exptl_absorpt_correction_T_min   0.837
_exptl_absorpt_correction_T_max   0.902
_exptl_absorpt_process_details    'SADABS (Sheldrick, 2008)'

_exptl_special_details
;
 ?
;

_diffrn_ambient_temperature       150(2)
_diffrn_radiation_wavelength      0.71073
_diffrn_radiation_type            MoK\a
_diffrn_source                    'sealed tube'
_diffrn_measurement_device_type   'Bruker Smart Apex II diffractometer'
_diffrn_measurement_method        '\f and \w scans'
_diffrn_detector_area_resol_mean  8.333
_diffrn_reflns_number             18413
_diffrn_reflns_av_unetI/netI      0.0201
_diffrn_reflns_av_R_equivalents   0.0188
_diffrn_reflns_limit_h_min        -17
_diffrn_reflns_limit_h_max        17
_diffrn_reflns_limit_k_min        -14
_diffrn_reflns_limit_k_max        14
_diffrn_reflns_limit_l_min        -18
_diffrn_reflns_limit_l_max        21
_diffrn_reflns_theta_min          2.407
_diffrn_reflns_theta_max          29.999
_diffrn_reflns_theta_full         25.000
_diffrn_measured_fraction_theta_max   0.989
_diffrn_measured_fraction_theta_full  0.999
_diffrn_reflns_Laue_measured_fraction_max    0.989
_diffrn_reflns_Laue_measured_fraction_full   0.999
_diffrn_reflns_point_group_measured_fraction_max   0.989
_diffrn_reflns_point_group_measured_fraction_full  0.999
_reflns_number_total              5579
_reflns_number_gt                 4836
_reflns_threshold_expression      'I > 2\s(I)'
_reflns_Friedel_coverage          0.000
_reflns_Friedel_fraction_max      .
_reflns_Friedel_fraction_full     .

_reflns_special_details
;
 Reflections were merged by SHELXL according to the crystal
 class for the calculation of statistics and refinement.

 _reflns_Friedel_fraction is defined as the number of unique
 Friedel pairs measured divided by the number that would be
 possible theoretically, ignoring centric projections and
 systematic absences.
;

_computing_data_collection        'Apex2 (Bruker, 2010)'
_computing_cell_refinement        Apex2
_computing_data_reduction         'Apex2, Saint'
_computing_structure_solution     'ShelXS-97 (Sheldrick, 2008)'
_computing_structure_refinement   'ShelXL-2012 (Sheldrick, 2012)'
_computing_molecular_graphics     'XSHEL (Bruker, 2004)'
_computing_publication_material   'Apex2, SHELXL-2012'

_refine_special_details
;
 ?
;
_refine_ls_structure_factor_coef  Fsqd
_refine_ls_matrix_type            full
_refine_ls_weighting_scheme       calc
_refine_ls_weighting_details
;
 w=1/[\s^2^(Fo^2^)+(0.0150P)^2^+1.9400P]
 where P=(Fo^2^+2Fc^2^)/3
;
_atom_sites_solution_primary      direct
_atom_sites_solution_secondary    difmap
_atom_sites_solution_hydrogens    geom
_refine_ls_hydrogen_treatment     constr
_refine_ls_extinction_method      none
_refine_ls_extinction_coef        .
_refine_ls_number_reflns          5579
_refine_ls_number_parameters      209
_refine_ls_number_restraints      0
_refine_ls_R_factor_all           0.0437
_refine_ls_R_factor_gt            0.0369
_refine_ls_wR_factor_ref          0.0820
_refine_ls_wR_factor_gt           0.0784
_refine_ls_goodness_of_fit_ref    1.000
_refine_ls_restrained_S_all       1.000
_refine_ls_shift/su_max           0.000
_refine_ls_shift/su_mean          0.000

loop_
 _atom_site_label
 _atom_site_type_symbol
 _atom_site_fract_x
 _atom_site_fract_y
 _atom_site_fract_z
 _atom_site_U_iso_or_equiv
 _atom_site_adp_type
 _atom_site_occupancy
 _atom_site_site_symmetry_order
 _atom_site_calc_flag
 _atom_site_refinement_flags_posn
 _atom_site_refinement_flags_adp
 _atom_site_refinement_flags_occupancy
 _atom_site_disorder_assembly
 _atom_site_disorder_group
V1 V 0.18504(2) 0.53708(2) 0.06736(2) 0.01862(6) Uani 1 1 d . . . . .
N1 N 0.04932(9) 0.50294(12) 0.01268(8) 0.0217(2) Uani 1 1 d . . . . .
C1 C 0.28608(10) 0.36714(13) -0.00011(9) 0.0202(2) Uani 1 1 d . . . . .
C2 C 0.31536(13) 0.25498(15) -0.05498(11) 0.0303(3) Uani 1 1 d . . . . .
H2A H 0.2527 0.2331 -0.1017 0.046 Uiso 1 1 calc R U . . .
H2B H 0.3358 0.1785 -0.0169 0.046 Uiso 1 1 calc R U . . .
H2C H 0.3765 0.2806 -0.0820 0.046 Uiso 1 1 calc R U . . .
N3 N 0.25557(9) 0.35138(11) 0.07736(8) 0.0209(2) Uani 1 1 d . . . . .
C3 C 0.23602(12) 0.22104(14) 0.11023(10) 0.0262(3) Uani 1 1 d . . . . .
H3 H 0.2105 0.1625 0.0582 0.031 Uiso 1 1 calc R U . . .
C4 C 0.14727(15) 0.22836(19) 0.16437(13) 0.0428(4) Uani 1 1 d . . . . .
H4A H 0.1718 0.2834 0.2167 0.064 Uiso 1 1 calc R U . . .
H4B H 0.1313 0.1402 0.1832 0.064 Uiso 1 1 calc R U . . .
H4C H 0.0815 0.2663 0.1281 0.064 Uiso 1 1 calc R U . . .
C5 C 0.33920(15) 0.16273(19) 0.16575(13) 0.0433(4) Uani 1 1 d . . . . .
H5A H 0.3960 0.1599 0.1305 0.065 Uiso 1 1 calc R U . . .
H5B H 0.3243 0.0738 0.1840 0.065 Uiso 1 1 calc R U . . .
H5C H 0.3636 0.2170 0.2184 0.065 Uiso 1 1 calc R U . . .
N6 N 0.28190(9) 0.49181(12) -0.02554(8) 0.0221(2) Uani 1 1 d . . . . .
C6 C 0.29671(13) 0.53137(16) -0.11359(10) 0.0295(3) Uani 1 1 d . . . . .
H6 H 0.3093 0.4505 -0.1467 0.035 Uiso 1 1 calc R U . . .
C7 C 0.19543(18) 0.5964(3) -0.16376(14) 0.0601(6) Uani 1 1 d . . . . .
H7A H 0.1336 0.5369 -0.1670 0.090 Uiso 1 1 calc R U . . .
H7B H 0.2048 0.6177 -0.2238 0.090 Uiso 1 1 calc R U . . .
H7C H 0.1819 0.6769 -0.1331 0.090 Uiso 1 1 calc R U . . .
C8 C 0.39437(18) 0.6193(3) -0.10867(14) 0.0612(7) Uani 1 1 d . . . . .
H8A H 0.3829 0.7007 -0.0782 0.092 Uiso 1 1 calc R U . . .
H8B H 0.4044 0.6393 -0.1687 0.092 Uiso 1 1 calc R U . . .
H8C H 0.4592 0.5748 -0.0759 0.092 Uiso 1 1 calc R U . . .
C10 C 0.27908(12) 0.60862(15) 0.20567(10) 0.0271(3) Uani 1 1 d . . . . .
C11 C 0.30363(12) 0.69527(15) 0.14137(10) 0.0281(3) Uani 1 1 d . . . . .
C12 C 0.20442(15) 0.75586(15) 0.09835(11) 0.0349(4) Uani 1 1 d . . . . .
C13 C 0.12024(13) 0.70552(17) 0.13880(12) 0.0344(4) Uani 1 1 d . . . . .
C14 C 0.16626(13) 0.61390(17) 0.20405(10) 0.0305(3) Uani 1 1 d . . . . .
C15 C 0.36158(15) 0.5271(2) 0.26725(12) 0.0410(4) Uani 1 1 d . . . . .
H15A H 0.4181 0.4981 0.2361 0.062 Uiso 1 1 calc R U . . .
H15B H 0.3257 0.4505 0.2868 0.062 Uiso 1 1 calc R U . . .
H15C H 0.3945 0.5796 0.3189 0.062 Uiso 1 1 calc R U . . .
C16 C 0.41530(15) 0.7234(2) 0.12498(13) 0.0471(5) Uani 1 1 d . . . . .
H16A H 0.4566 0.7731 0.1750 0.071 Uiso 1 1 calc R U . . .
H16B H 0.4094 0.7748 0.0705 0.071 Uiso 1 1 calc R U . . .
H16C H 0.4527 0.6408 0.1188 0.071 Uiso 1 1 calc R U . . .
C17 C 0.1902(2) 0.86080(19) 0.02895(15) 0.0604(6) Uani 1 1 d . . . . .
H17A H 0.1250 0.8427 -0.0161 0.091 Uiso 1 1 calc R U . . .
H17B H 0.2538 0.8624 0.0011 0.091 Uiso 1 1 calc R U . . .
H17C H 0.1827 0.9458 0.0565 0.091 Uiso 1 1 calc R U . . .
C18 C 0.00302(15) 0.7487(2) 0.12035(15) 0.0528(6) Uani 1 1 d . . . . .
H18A H -0.0440 0.6723 0.1203 0.079 Uiso 1 1 calc R U . . .
H18B H -0.0143 0.7918 0.0624 0.079 Uiso 1 1 calc R U . . .
H18C H -0.0087 0.8102 0.1664 0.079 Uiso 1 1 calc R U . . .
C19 C 0.10770(16) 0.5455(2) 0.26789(12) 0.0450(5) Uani 1 1 d . . . . .
H19A H 0.0841 0.6103 0.3070 0.067 Uiso 1 1 calc R U . . .
H19B H 0.1568 0.4826 0.3036 0.067 Uiso 1 1 calc R U . . .
H19C H 0.0442 0.4992 0.2345 0.067 Uiso 1 1 calc R U . . .

loop_
 _atom_site_aniso_label
 _atom_site_aniso_U_11
 _atom_site_aniso_U_22
 _atom_site_aniso_U_33
 _atom_site_aniso_U_23
 _atom_site_aniso_U_13
 _atom_site_aniso_U_12
V1 0.01582(10) 0.02040(11) 0.01894(11) -0.00418(9) 0.00184(8) -0.00044(8)
N1 0.0198(5) 0.0235(5) 0.0210(5) -0.0054(4) 0.0023(4) 0.0003(4)
C1 0.0161(5) 0.0236(6) 0.0208(6) -0.0005(5) 0.0036(5) 0.0011(5)
C2 0.0364(8) 0.0265(7) 0.0315(8) -0.0026(6) 0.0151(6) 0.0039(6)
N3 0.0209(5) 0.0216(5) 0.0205(5) 0.0017(4) 0.0050(4) 0.0008(4)
C3 0.0297(7) 0.0238(7) 0.0254(7) 0.0044(5) 0.0060(6) -0.0009(5)
C4 0.0445(10) 0.0401(10) 0.0502(11) 0.0115(8) 0.0249(9) -0.0037(8)
C5 0.0431(10) 0.0416(10) 0.0429(10) 0.0194(8) 0.0026(8) 0.0081(8)
N6 0.0244(5) 0.0230(5) 0.0202(5) 0.0012(4) 0.0074(4) 0.0001(4)
C6 0.0408(8) 0.0279(7) 0.0218(7) 0.0026(6) 0.0108(6) -0.0017(6)
C7 0.0519(12) 0.0864(17) 0.0384(11) 0.0301(11) 0.0003(9) 0.0047(12)
C8 0.0551(12) 0.0891(18) 0.0424(11) 0.0178(12) 0.0168(10) -0.0278(12)
C10 0.0271(7) 0.0308(7) 0.0221(7) -0.0083(6) 0.0018(5) -0.0049(6)
C11 0.0275(7) 0.0299(7) 0.0261(7) -0.0093(6) 0.0041(6) -0.0102(6)
C12 0.0507(10) 0.0207(7) 0.0288(8) -0.0069(6) -0.0030(7) -0.0015(6)
C13 0.0279(7) 0.0344(8) 0.0385(9) -0.0202(7) 0.0007(6) 0.0040(6)
C14 0.0286(7) 0.0373(8) 0.0266(7) -0.0139(6) 0.0080(6) -0.0061(6)
C15 0.0395(9) 0.0473(10) 0.0307(8) -0.0022(8) -0.0065(7) -0.0011(8)
C16 0.0369(9) 0.0633(13) 0.0427(10) -0.0128(9) 0.0123(8) -0.0251(9)
C17 0.1036(19) 0.0252(9) 0.0444(11) 0.0018(8) -0.0041(12) -0.0045(10)
C18 0.0377(9) 0.0552(12) 0.0603(13) -0.0279(10) -0.0027(9) 0.0181(9)
C19 0.0449(10) 0.0579(12) 0.0371(9) -0.0138(9) 0.0203(8) -0.0127(9)

_geom_special_details
;
 All esds (except the esd in the dihedral angle between two l.s. planes)
 are estimated using the full covariance matrix.  The cell esds are taken
 into account individually in the estimation of esds in distances, angles
 and torsion angles; correlations between esds in cell parameters are only
 used when they are defined by crystal symmetry.  An approximate (isotropic)
 treatment of cell esds is used for estimating esds involving l.s. planes.
;

loop_
 _geom_bond_atom_site_label_1
 _geom_bond_atom_site_label_2
 _geom_bond_distance
 _geom_bond_site_symmetry_2
 _geom_bond_publ_flag
V1 N1 1.7795(11) . ?
V1 N3 2.0868(12) . ?
V1 N6 2.1071(12) . ?
V1 C13 2.2792(15) . ?
V1 C12 2.2886(15) . ?
V1 C14 2.3029(15) . ?
V1 C11 2.3355(14) . ?
V1 C10 2.3372(14) . ?
V1 C1 2.4971(13) . ?
N1 N1 1.225(2) 3_565 ?
C1 N6 1.3306(17) . ?
C1 N3 1.3341(17) . ?
C1 C2 1.5124(19) . ?
C2 H2A 0.9800 . ?
C2 H2B 0.9800 . ?
C2 H2C 0.9800 . ?
N3 C3 1.4629(18) . ?
C3 C4 1.522(2) . ?
C3 C5 1.525(2) . ?
C3 H3 1.0000 . ?
C4 H4A 0.9800 . ?
C4 H4B 0.9800 . ?
C4 H4C 0.9800 . ?
C5 H5A 0.9800 . ?
C5 H5B 0.9800 . ?
C5 H5C 0.9800 . ?
N6 C6 1.4623(18) . ?
C6 C7 1.505(3) . ?
C6 C8 1.511(3) . ?
C6 H6 1.0000 . ?
C7 H7A 0.9800 . ?
C7 H7B 0.9800 . ?
C7 H7C 0.9800 . ?
C8 H8A 0.9800 . ?
C8 H8B 0.9800 . ?
C8 H8C 0.9800 . ?
C10 C11 1.408(2) . ?
C10 C14 1.414(2) . ?
C10 C15 1.509(2) . ?
C11 C12 1.431(2) . ?
C11 C16 1.503(2) . ?
C12 C13 1.427(3) . ?
C12 C17 1.499(3) . ?
C13 C14 1.410(3) . ?
C13 C18 1.510(2) . ?
C14 C19 1.512(2) . ?
C15 H15A 0.9800 . ?
C15 H15B 0.9800 . ?
C15 H15C 0.9800 . ?
C16 H16A 0.9800 . ?
C16 H16B 0.9800 . ?
C16 H16C 0.9800 . ?
C17 H17A 0.9800 . ?
C17 H17B 0.9800 . ?
C17 H17C 0.9800 . ?
C18 H18A 0.9800 . ?
C18 H18B 0.9800 . ?
C18 H18C 0.9800 . ?
C19 H19A 0.9800 . ?
C19 H19B 0.9800 . ?
C19 H19C 0.9800 . ?

loop_
 _geom_angle_atom_site_label_1
 _geom_angle_atom_site_label_2
 _geom_angle_atom_site_label_3
 _geom_angle
 _geom_angle_site_symmetry_1
 _geom_angle_site_symmetry_3
 _geom_angle_publ_flag
N1 V1 N3 102.10(5) . . ?
N1 V1 N6 105.37(5) . . ?
N3 V1 N6 63.64(4) . . ?
N1 V1 C13 88.57(5) . . ?
N3 V1 C13 146.98(6) . . ?
N6 V1 C13 143.55(6) . . ?
N1 V1 C12 110.01(6) . . ?
N3 V1 C12 147.86(6) . . ?
N6 V1 C12 107.71(6) . . ?
C13 V1 C12 36.41(7) . . ?
N1 V1 C14 103.63(5) . . ?
N3 V1 C14 111.23(6) . . ?
N6 V1 C14 150.97(5) . . ?
C13 V1 C14 35.84(6) . . ?
C12 V1 C14 60.17(6) . . ?
N1 V1 C11 145.54(6) . . ?
N3 V1 C11 111.90(5) . . ?
N6 V1 C11 94.84(5) . . ?
C13 V1 C11 59.78(6) . . ?
C12 V1 C11 36.03(6) . . ?
C14 V1 C11 59.33(5) . . ?
N1 V1 C10 139.01(5) . . ?
N3 V1 C10 95.00(5) . . ?
N6 V1 C10 115.59(5) . . ?
C13 V1 C10 59.22(6) . . ?
C12 V1 C10 59.41(6) . . ?
C14 V1 C10 35.48(5) . . ?
C11 V1 C10 35.07(5) . . ?
N1 V1 C1 100.72(5) . . ?
N3 V1 C1 32.29(4) . . ?
N6 V1 C1 32.20(4) . . ?
C13 V1 C1 170.60(5) . . ?
C12 V1 C1 136.40(6) . . ?
C14 V1 C1 140.46(5) . . ?
C11 V1 C1 110.87(5) . . ?
C10 V1 C1 112.97(5) . . ?
N1 N1 V1 166.96(14) 3_565 . ?
N6 C1 N3 112.17(12) . . ?
N6 C1 C2 124.10(13) . . ?
N3 C1 C2 123.64(13) . . ?
N6 C1 V1 57.55(7) . . ?
N3 C1 V1 56.67(7) . . ?
C2 C1 V1 163.79(10) . . ?
C1 C2 H2A 109.5 . . ?
C1 C2 H2B 109.5 . . ?
H2A C2 H2B 109.5 . . ?
C1 C2 H2C 109.5 . . ?
H2A C2 H2C 109.5 . . ?
H2B C2 H2C 109.5 . . ?
C1 N3 C3 121.17(12) . . ?
C1 N3 V1 91.04(8) . . ?
C3 N3 V1 139.02(9) . . ?
N3 C3 C4 109.70(13) . . ?
N3 C3 C5 111.53(13) . . ?
C4 C3 C5 110.26(14) . . ?
N3 C3 H3 108.4 . . ?
C4 C3 H3 108.4 . . ?
C5 C3 H3 108.4 . . ?
C3 C4 H4A 109.5 . . ?
C3 C4 H4B 109.5 . . ?
H4A C4 H4B 109.5 . . ?
C3 C4 H4C 109.5 . . ?
H4A C4 H4C 109.5 . . ?
H4B C4 H4C 109.5 . . ?
C3 C5 H5A 109.5 . . ?
C3 C5 H5B 109.5 . . ?
H5A C5 H5B 109.5 . . ?
C3 C5 H5C 109.5 . . ?
H5A C5 H5C 109.5 . . ?
H5B C5 H5C 109.5 . . ?
C1 N6 C6 122.19(12) . . ?
C1 N6 V1 90.25(8) . . ?
C6 N6 V1 140.10(10) . . ?
N6 C6 C7 110.28(14) . . ?
N6 C6 C8 111.76(14) . . ?
C7 C6 C8 111.03(17) . . ?
N6 C6 H6 107.9 . . ?
C7 C6 H6 107.9 . . ?
C8 C6 H6 107.9 . . ?
C6 C7 H7A 109.5 . . ?
C6 C7 H7B 109.5 . . ?
H7A C7 H7B 109.5 . . ?
C6 C7 H7C 109.5 . . ?
H7A C7 H7C 109.5 . . ?
H7B C7 H7C 109.5 . . ?
C6 C8 H8A 109.5 . . ?
C6 C8 H8B 109.5 . . ?
H8A C8 H8B 109.5 . . ?
C6 C8 H8C 109.5 . . ?
H8A C8 H8C 109.5 . . ?
H8B C8 H8C 109.5 . . ?
C11 C10 C14 108.89(14) . . ?
C11 C10 C15 124.73(15) . . ?
C14 C10 C15 126.36(15) . . ?
C11 C10 V1 72.40(8) . . ?
C14 C10 V1 70.94(8) . . ?
C15 C10 V1 123.99(11) . . ?
C10 C11 C12 107.73(14) . . ?
C10 C11 C16 125.60(16) . . ?
C12 C11 C16 126.59(16) . . ?
C10 C11 V1 72.53(8) . . ?
C12 C11 V1 70.20(8) . . ?
C16 C11 V1 125.24(11) . . ?
C13 C12 C11 107.19(15) . . ?
C13 C12 C17 125.18(18) . . ?
C11 C12 C17 127.45(19) . . ?
C13 C12 V1 71.44(9) . . ?
C11 C12 V1 73.77(9) . . ?
C17 C12 V1 123.87(12) . . ?
C14 C13 C12 108.43(14) . . ?
C14 C13 C18 125.04(18) . . ?
C12 C13 C18 126.40(18) . . ?
C14 C13 V1 72.99(9) . . ?
C12 C13 V1 72.15(9) . . ?
C18 C13 V1 124.02(11) . . ?
C13 C14 C10 107.75(14) . . ?
C13 C14 C19 125.92(16) . . ?
C10 C14 C19 125.99(16) . . ?
C13 C14 V1 71.16(9) . . ?
C10 C14 V1 73.58(8) . . ?
C19 C14 V1 126.08(11) . . ?
C10 C15 H15A 109.5 . . ?
C10 C15 H15B 109.5 . . ?
H15A C15 H15B 109.5 . . ?
C10 C15 H15C 109.5 . . ?
H15A C15 H15C 109.5 . . ?
H15B C15 H15C 109.5 . . ?
C11 C16 H16A 109.5 . . ?
C11 C16 H16B 109.5 . . ?
H16A C16 H16B 109.5 . . ?
C11 C16 H16C 109.5 . . ?
H16A C16 H16C 109.5 . . ?
H16B C16 H16C 109.5 . . ?
C12 C17 H17A 109.5 . . ?
C12 C17 H17B 109.5 . . ?
H17A C17 H17B 109.5 . . ?
C12 C17 H17C 109.5 . . ?
H17A C17 H17C 109.5 . . ?
H17B C17 H17C 109.5 . . ?
C13 C18 H18A 109.5 . . ?
C13 C18 H18B 109.5 . . ?
H18A C18 H18B 109.5 . . ?
C13 C18 H18C 109.5 . . ?
H18A C18 H18C 109.5 . . ?
H18B C18 H18C 109.5 . . ?
C14 C19 H19A 109.5 . . ?
C14 C19 H19B 109.5 . . ?
H19A C19 H19B 109.5 . . ?
C14 C19 H19C 109.5 . . ?
H19A C19 H19C 109.5 . . ?
H19B C19 H19C 109.5 . . ?

loop_
 _geom_torsion_atom_site_label_1
 _geom_torsion_atom_site_label_2
 _geom_torsion_atom_site_label_3
 _geom_torsion_atom_site_label_4
 _geom_torsion
 _geom_torsion_site_symmetry_1
 _geom_torsion_site_symmetry_2
 _geom_torsion_site_symmetry_3
 _geom_torsion_site_symmetry_4
 _geom_torsion_publ_flag
N3 V1 N1 N1 137.5(7) . . . 3_565 ?
N6 V1 N1 N1 -156.8(7) . . . 3_565 ?
C13 V1 N1 N1 -11.0(7) . . . 3_565 ?
C12 V1 N1 N1 -41.0(7) . . . 3_565 ?
C14 V1 N1 N1 21.8(7) . . . 3_565 ?
C11 V1 N1 N1 -33.1(7) . . . 3_565 ?
C10 V1 N1 N1 25.0(7) . . . 3_565 ?
C1 V1 N1 N1 170.4(7) . . . 3_565 ?
N6 C1 N3 C3 169.30(12) . . . . ?
C2 C1 N3 C3 -7.2(2) . . . . ?
V1 C1 N3 C3 153.31(14) . . . . ?
N6 C1 N3 V1 15.98(11) . . . . ?
C2 C1 N3 V1 -160.54(12) . . . . ?
C1 N3 C3 C4 -147.95(14) . . . . ?
V1 N3 C3 C4 -11.2(2) . . . . ?
C1 N3 C3 C5 89.60(17) . . . . ?
V1 N3 C3 C5 -133.62(14) . . . . ?
N3 C1 N6 C6 -171.23(12) . . . . ?
C2 C1 N6 C6 5.3(2) . . . . ?
V1 C1 N6 C6 -155.40(14) . . . . ?
N3 C1 N6 V1 -15.82(11) . . . . ?
C2 C1 N6 V1 160.68(12) . . . . ?
C1 N6 C6 C7 117.66(18) . . . . ?
V1 N6 C6 C7 -21.9(2) . . . . ?
C1 N6 C6 C8 -118.33(18) . . . . ?
V1 N6 C6 C8 102.12(19) . . . . ?
C14 C10 C11 C12 -0.18(17) . . . . ?
C15 C10 C11 C12 -178.66(14) . . . . ?
V1 C10 C11 C12 61.74(10) . . . . ?
C14 C10 C11 C16 176.84(15) . . . . ?
C15 C10 C11 C16 -1.6(3) . . . . ?
V1 C10 C11 C16 -121.24(16) . . . . ?
C14 C10 C11 V1 -61.92(10) . . . . ?
C15 C10 C11 V1 119.59(15) . . . . ?
C10 C11 C12 C13 0.83(17) . . . . ?
C16 C11 C12 C13 -176.15(15) . . . . ?
V1 C11 C12 C13 64.08(10) . . . . ?
C10 C11 C12 C17 176.21(16) . . . . ?
C16 C11 C12 C17 -0.8(3) . . . . ?
V1 C11 C12 C17 -120.54(18) . . . . ?
C10 C11 C12 V1 -63.25(10) . . . . ?
C16 C11 C12 V1 119.77(16) . . . . ?
C11 C12 C13 C14 -1.18(17) . . . . ?
C17 C12 C13 C14 -176.69(16) . . . . ?
V1 C12 C13 C14 64.46(11) . . . . ?
C11 C12 C13 C18 174.83(15) . . . . ?
C17 C12 C13 C18 -0.7(3) . . . . ?
V1 C12 C13 C18 -119.53(16) . . . . ?
C11 C12 C13 V1 -65.64(10) . . . . ?
C17 C12 C13 V1 118.85(16) . . . . ?
C12 C13 C14 C10 1.07(17) . . . . ?
C18 C13 C14 C10 -175.00(15) . . . . ?
V1 C13 C14 C10 64.99(10) . . . . ?
C12 C13 C14 C19 174.66(15) . . . . ?
C18 C13 C14 C19 -1.4(3) . . . . ?
V1 C13 C14 C19 -121.42(16) . . . . ?
C12 C13 C14 V1 -63.92(11) . . . . ?
C18 C13 C14 V1 120.01(16) . . . . ?
C11 C10 C14 C13 -0.56(17) . . . . ?
C15 C10 C14 C13 177.90(15) . . . . ?
V1 C10 C14 C13 -63.40(10) . . . . ?
C11 C10 C14 C19 -174.14(15) . . . . ?
C15 C10 C14 C19 4.3(3) . . . . ?
V1 C10 C14 C19 123.01(16) . . . . ?
C11 C10 C14 V1 62.85(11) . . . . ?
C15 C10 C14 V1 -118.70(16) . . . . ?

_refine_diff_density_max    0.587
_refine_diff_density_min   -0.340
_refine_diff_density_rms    0.054
 
_diffrn_radiation_monochromator       graphite
_symmetry_cell_setting                Monoclinic
_symmetry_space_group_name_H-M        P21/c
_diffrn_orient_matrix_type            standard
_diffrn_orient_matrix_UB_11           0.0032220
_diffrn_orient_matrix_UB_12          -0.0706165
_diffrn_orient_matrix_UB_13          -0.0443729
_diffrn_orient_matrix_UB_21          -0.0799062
_diffrn_orient_matrix_UB_22          -0.0144801
_diffrn_orient_matrix_UB_23          -0.0066842
_diffrn_orient_matrix_UB_31          -0.0140497
_diffrn_orient_matrix_UB_32           0.0662009
_diffrn_orient_matrix_UB_33          -0.0487599
_diffrn_measurement_specimen_support  'MiTeGen loop'
_diffrn_detector                      'CCD area detector'
_iucr_refine_instructions_details     'See _shelx_res_file'

#_______________________________________________________________________________
#
_publ_section_references
;
Bruker (2010). Apex2. Bruker AXS Inc., Madison, Wisconsin, USA.

Sheldrick, G. M. (2008). Acta Cryst. A64, 112-122.

Sheldrick, G. M. (2012). SHELXL-2012. University of G\"ottingen, Germany.
;

data_cmpd8

_audit_creation_method            'SHELXL-2012 & ZCIF'
_chemical_name_systematic
;
cmpd8
;
_chemical_name_common             cmpd8
_chemical_formula_moiety          'C18 H32 Cl N2 V'
_chemical_formula_sum             'C18 H32 Cl N2 V'
_chemical_formula_weight          362.84

loop_
 _atom_type_symbol
 _atom_type_description
 _atom_type_scat_dispersion_real
 _atom_type_scat_dispersion_imag
 _atom_type_scat_source
 'C'  'C'   0.0033   0.0016
 'International Tables Vol C Tables 4.2.6.8 and 6.1.1.4'
 'H'  'H'   0.0000   0.0000
 'International Tables Vol C Tables 4.2.6.8 and 6.1.1.4'
 'N'  'N'   0.0061   0.0033
 'International Tables Vol C Tables 4.2.6.8 and 6.1.1.4'
 'Cl'  'Cl'   0.1484   0.1585
 'International Tables Vol C Tables 4.2.6.8 and 6.1.1.4'
 'V'  'V'   0.3005   0.5294
 'International Tables Vol C Tables 4.2.6.8 and 6.1.1.4'

_space_group_crystal_system       monoclinic
_space_group_IT_number            14
_space_group_name_H-M_alt         'P 21/n'
_space_group_name_Hall            '-P 2yn'

_shelx_space_group_comment
;
The symmetry employed for this shelxl refinement is uniquely defined
by the following loop, which should always be used as a source of
symmetry information in preference to the above space-group names.
They are only intended as comments.
;

loop_
 _space_group_symop_operation_xyz
 'x, y, z'
 '-x+1/2, y+1/2, -z+1/2'
 '-x, -y, -z'
 'x-1/2, -y-1/2, z-1/2'

_cell_length_a                    12.9672(9)
_cell_length_b                    9.1331(6)
_cell_length_c                    16.5204(11)
_cell_angle_alpha                 90
_cell_angle_beta                  91.1382(10)
_cell_angle_gamma                 90
_cell_volume                      1956.1(2)
_cell_formula_units_Z             4
_cell_measurement_temperature     150(2)
_cell_measurement_reflns_used     15075
_cell_measurement_theta_min       2.5
_cell_measurement_theta_max       30.5

_exptl_crystal_description        needle
_exptl_crystal_colour             red
_exptl_crystal_density_meas       ?
_exptl_crystal_density_method     'not measured'
_exptl_crystal_density_diffrn     1.232
_exptl_crystal_F_000              776
_exptl_transmission_factor_min    ?
_exptl_transmission_factor_max    ?
_exptl_crystal_size_max           0.41
_exptl_crystal_size_mid           0.165
_exptl_crystal_size_min           0.15
_exptl_absorpt_coefficient_mu     0.643
_shelx_estimated_absorpt_T_min    0.778
_shelx_estimated_absorpt_T_max    0.910
_exptl_absorpt_correction_type    multi-scan
_exptl_absorpt_correction_T_min   0.801
_exptl_absorpt_correction_T_max   0.908
_exptl_absorpt_process_details    'SADABS (Sheldrick, 2008)'

_diffrn_ambient_temperature       150(2)
_diffrn_radiation_wavelength      0.71073
_diffrn_radiation_type            MoK\a
_diffrn_source                    'sealed tube'
_diffrn_measurement_device_type   'Bruker Smart Apex II diffractometer'
_diffrn_measurement_method        '\f and \w scans'
_diffrn_detector_area_resol_mean  8.333
_diffrn_reflns_number             27990
_diffrn_reflns_av_unetI/netI      0.0149
_diffrn_reflns_av_R_equivalents   0.0195
_diffrn_reflns_limit_h_min        -18
_diffrn_reflns_limit_h_max        18
_diffrn_reflns_limit_k_min        -12
_diffrn_reflns_limit_k_max        12
_diffrn_reflns_limit_l_min        -23
_diffrn_reflns_limit_l_max        23
_diffrn_reflns_theta_min          1.978
_diffrn_reflns_theta_max          29.997
_diffrn_reflns_theta_full         25.000
_diffrn_measured_fraction_theta_max   1.000
_diffrn_measured_fraction_theta_full  1.000
_diffrn_reflns_Laue_measured_fraction_max    1.000
_diffrn_reflns_Laue_measured_fraction_full   1.000
_diffrn_reflns_point_group_measured_fraction_max   1.000
_diffrn_reflns_point_group_measured_fraction_full  1.000
_reflns_number_total              5708
_reflns_number_gt                 5179
_reflns_threshold_expression      'I > 2\s(I)'
_reflns_Friedel_coverage          0.000
_reflns_Friedel_fraction_max      .
_reflns_Friedel_fraction_full     .

_reflns_special_details
;
 Reflections were merged by SHELXL according to the crystal
 class for the calculation of statistics and refinement.

 _reflns_Friedel_fraction is defined as the number of unique
 Friedel pairs measured divided by the number that would be
 possible theoretically, ignoring centric projections and
 systematic absences.
;

_computing_data_collection        'Apex2 (Bruker, 2010)'
_computing_cell_refinement        Apex2
_computing_data_reduction         'Apex2, Saint'
_computing_structure_solution     'ShelXS-97 (Sheldrick, 2008)'
_computing_structure_refinement   'ShelXL-2012 (Sheldrick, 2012)'
_computing_molecular_graphics     'XSHEL (Bruker, 2004)'
_computing_publication_material   'Apex2, SHELXL-2012'

_refine_special_details
;
H atoms were positioned from geometric considerations and refined as
riding on the attached atoms with Uiso freely refined.
;
_refine_ls_structure_factor_coef  Fsqd
_refine_ls_matrix_type            full
_refine_ls_weighting_scheme       calc
_refine_ls_weighting_details
;
 w=1/[\s^2^(Fo^2^)+(0.0100P)^2^+1.2610P]
 where P=(Fo^2^+2Fc^2^)/3
;
_atom_sites_solution_primary      direct
_atom_sites_solution_secondary    difmap
_atom_sites_solution_hydrogens    geom
_refine_ls_hydrogen_treatment     refU
_refine_ls_extinction_method      none
_refine_ls_extinction_coef        .
_refine_ls_number_reflns          5708
_refine_ls_number_parameters      245
_refine_ls_number_restraints      0
_refine_ls_R_factor_all           0.0295
_refine_ls_R_factor_gt            0.0259
_refine_ls_wR_factor_ref          0.0570
_refine_ls_wR_factor_gt           0.0551
_refine_ls_goodness_of_fit_ref    1.000
_refine_ls_restrained_S_all       1.000
_refine_ls_shift/su_max           0.001
_refine_ls_shift/su_mean          0.000

loop_
 _atom_site_label
 _atom_site_type_symbol
 _atom_site_fract_x
 _atom_site_fract_y
 _atom_site_fract_z
 _atom_site_U_iso_or_equiv
 _atom_site_adp_type
 _atom_site_occupancy
 _atom_site_site_symmetry_order
 _atom_site_calc_flag
 _atom_site_refinement_flags_posn
 _atom_site_refinement_flags_adp
 _atom_site_refinement_flags_occupancy
 _atom_site_disorder_assembly
 _atom_site_disorder_group
V1 V 0.26274(2) 0.21680(2) 0.04856(2) 0.01552(4) Uani 1 1 d . . . . .
Cl1 Cl 0.27635(2) -0.02170(3) 0.09366(2) 0.03132(7) Uani 1 1 d . . . . .
C10 C 0.08394(8) 0.21310(11) -0.00858(6) 0.01906(19) Uani 1 1 d . . . . .
C11 C -0.02504(8) 0.19392(14) -0.04079(8) 0.0281(2) Uani 1 1 d . . . . .
H11A H -0.0302 0.2325 -0.0961 0.045(5) Uiso 1 1 calc R . . . .
H11B H -0.0727 0.2472 -0.0061 0.056(5) Uiso 1 1 calc R . . . .
H11C H -0.0429 0.0896 -0.0411 0.065(6) Uiso 1 1 calc R . . . .
N11 N 0.10904(7) 0.25407(10) 0.06677(5) 0.02037(17) Uani 1 1 d . . . . .
N12 N 0.16815(7) 0.18844(10) -0.05148(5) 0.01967(17) Uani 1 1 d . . . . .
C12 C 0.03178(9) 0.26290(14) 0.13026(7) 0.0263(2) Uani 1 1 d . . . . .
H12 H -0.0240 0.1905 0.1172 0.027(4) Uiso 1 1 calc R . . . .
C13 C 0.08212(12) 0.21945(19) 0.21072(8) 0.0417(3) Uani 1 1 d . . . . .
H13A H 0.1132 0.1221 0.2057 0.054(5) Uiso 1 1 calc R . . . .
H13B H 0.0299 0.2174 0.2528 0.053(5) Uiso 1 1 calc R . . . .
H13C H 0.1357 0.2908 0.2255 0.054(5) Uiso 1 1 calc R . . . .
C14 C -0.01750(10) 0.41414(16) 0.13640(9) 0.0381(3) Uani 1 1 d . . . . .
H14A H 0.0333 0.4839 0.1582 0.053(5) Uiso 1 1 calc R . . . .
H14B H -0.0765 0.4094 0.1724 0.050(5) Uiso 1 1 calc R . . . .
H14C H -0.0409 0.4463 0.0825 0.052(5) Uiso 1 1 calc R . . . .
C15 C 0.16357(9) 0.12558(13) -0.13292(6) 0.0238(2) Uani 1 1 d . . . . .
H15 H 0.0935 0.0823 -0.1421 0.028(4) Uiso 1 1 calc R . . . .
C16 C 0.24281(11) 0.00347(16) -0.13840(8) 0.0382(3) Uani 1 1 d . . . . .
H16A H 0.3122 0.0441 -0.1300 0.045(5) Uiso 1 1 calc R . . . .
H16B H 0.2378 -0.0422 -0.1920 0.053(5) Uiso 1 1 calc R . . . .
H16C H 0.2295 -0.0702 -0.0967 0.052(5) Uiso 1 1 calc R . . . .
C17 C 0.18085(11) 0.24128(16) -0.19764(7) 0.0353(3) Uani 1 1 d . . . . .
H17A H 0.1279 0.3174 -0.1938 0.051(5) Uiso 1 1 calc R . . . .
H17B H 0.1766 0.1956 -0.2513 0.046(5) Uiso 1 1 calc R . . . .
H17C H 0.2492 0.2853 -0.1895 0.043(4) Uiso 1 1 calc R . . . .
C20 C 0.31558(8) 0.44396(11) 0.09743(6) 0.01943(19) Uani 1 1 d . . . . .
C21 C 0.33386(8) 0.43796(12) 0.01292(6) 0.0205(2) Uani 1 1 d . . . . .
C22 C 0.40888(8) 0.32697(12) -0.00091(6) 0.0206(2) Uani 1 1 d . . . . .
C23 C 0.43562(7) 0.26340(11) 0.07526(6) 0.01950(19) Uani 1 1 d . . . . .
C24 C 0.37768(8) 0.33530(11) 0.13588(6) 0.01879(19) Uani 1 1 d . . . . .
C25 C 0.24892(9) 0.55524(13) 0.13771(8) 0.0287(2) Uani 1 1 d . . . . .
H25A H 0.2851 0.6494 0.1402 0.042(4) Uiso 1 1 calc R . . . .
H25B H 0.2338 0.5226 0.1927 0.040(4) Uiso 1 1 calc R . . . .
H25C H 0.1843 0.5665 0.1066 0.043(4) Uiso 1 1 calc R . . . .
C26 C 0.28983(11) 0.54205(14) -0.04910(8) 0.0335(3) Uani 1 1 d . . . . .
H26A H 0.2148 0.5302 -0.0526 0.047(10) Uiso 0.57(3) 1 calc R . P . .
H26B H 0.3195 0.5211 -0.1019 0.040(9) Uiso 0.57(3) 1 calc R . P . .
H26C H 0.3065 0.6428 -0.0332 0.030(8) Uiso 0.57(3) 1 calc R . P . .
H26D H 0.3457 0.5992 -0.0726 0.049(13) Uiso 0.43(3) 1 calc R . P . .
H26E H 0.2410 0.6083 -0.0232 0.038(12) Uiso 0.43(3) 1 calc R . P . .
H26F H 0.2540 0.4865 -0.0919 0.031(11) Uiso 0.43(3) 1 calc R . P . .
C27 C 0.45955(10) 0.29689(15) -0.08032(7) 0.0311(3) Uani 1 1 d . . . . .
H27A H 0.4069 0.2932 -0.1236 0.070(6) Uiso 1 1 calc R . . . .
H27B H 0.4958 0.2028 -0.0773 0.066(6) Uiso 1 1 calc R . . . .
H27C H 0.5090 0.3751 -0.0917 0.056(5) Uiso 1 1 calc R . . . .
C28 C 0.51524(8) 0.14726(13) 0.09171(8) 0.0279(2) Uani 1 1 d . . . . .
H28A H 0.5722 0.1888 0.1241 0.047(5) Uiso 1 1 calc R . . . .
H28B H 0.5416 0.1108 0.0403 0.052(5) Uiso 1 1 calc R . . . .
H28C H 0.4839 0.0664 0.1215 0.056(5) Uiso 1 1 calc R . . . .
C29 C 0.38688(9) 0.30350(14) 0.22496(7) 0.0281(2) Uani 1 1 d . . . . .
H29A H 0.3915 0.1975 0.2334 0.047(5) Uiso 1 1 calc R . . . .
H29B H 0.3261 0.3417 0.2523 0.044(4) Uiso 1 1 calc R . . . .
H29C H 0.4491 0.3506 0.2473 0.045(4) Uiso 1 1 calc R . . . .

loop_
 _atom_site_aniso_label
 _atom_site_aniso_U_11
 _atom_site_aniso_U_22
 _atom_site_aniso_U_33
 _atom_site_aniso_U_23
 _atom_site_aniso_U_13
 _atom_site_aniso_U_12
V1 0.01376(7) 0.01593(8) 0.01682(8) 0.00082(6) -0.00074(5) -0.00044(6)
Cl1 0.02641(13) 0.02027(12) 0.04699(18) 0.01058(12) -0.00648(12) -0.00219(10)
C10 0.0158(4) 0.0179(4) 0.0233(5) 0.0031(4) -0.0024(4) 0.0010(3)
C11 0.0174(5) 0.0333(6) 0.0334(6) 0.0007(5) -0.0059(4) 0.0009(4)
N11 0.0161(4) 0.0243(4) 0.0207(4) 0.0002(3) 0.0014(3) 0.0012(3)
N12 0.0175(4) 0.0230(4) 0.0184(4) -0.0009(3) -0.0021(3) 0.0012(3)
C12 0.0207(5) 0.0317(6) 0.0267(5) 0.0001(5) 0.0066(4) 0.0003(4)
C13 0.0430(8) 0.0572(9) 0.0252(6) 0.0081(6) 0.0100(5) 0.0084(7)
C14 0.0273(6) 0.0416(7) 0.0456(8) -0.0058(6) 0.0081(5) 0.0102(5)
C15 0.0238(5) 0.0271(5) 0.0204(5) -0.0038(4) -0.0039(4) 0.0024(4)
C16 0.0456(8) 0.0356(7) 0.0331(7) -0.0095(6) -0.0035(6) 0.0156(6)
C17 0.0445(7) 0.0402(7) 0.0211(6) 0.0028(5) -0.0025(5) 0.0042(6)
C20 0.0169(4) 0.0163(4) 0.0251(5) -0.0016(4) -0.0014(4) -0.0013(3)
C21 0.0195(4) 0.0187(5) 0.0233(5) 0.0030(4) -0.0027(4) -0.0036(4)
C22 0.0171(4) 0.0229(5) 0.0219(5) -0.0005(4) 0.0020(4) -0.0049(4)
C23 0.0136(4) 0.0197(5) 0.0251(5) -0.0011(4) -0.0015(3) -0.0008(3)
C24 0.0168(4) 0.0191(5) 0.0203(5) -0.0009(4) -0.0023(3) -0.0019(4)
C25 0.0264(5) 0.0214(5) 0.0385(7) -0.0063(5) 0.0008(5) 0.0040(4)
C26 0.0379(7) 0.0278(6) 0.0345(7) 0.0109(5) -0.0098(5) -0.0037(5)
C27 0.0276(6) 0.0403(7) 0.0255(6) -0.0044(5) 0.0077(4) -0.0078(5)
C28 0.0187(5) 0.0258(5) 0.0391(7) -0.0032(5) -0.0041(4) 0.0043(4)
C29 0.0308(6) 0.0323(6) 0.0209(5) 0.0013(4) -0.0037(4) -0.0014(5)

_geom_special_details
;
 All esds (except the esd in the dihedral angle between two l.s. planes)
 are estimated using the full covariance matrix.  The cell esds are taken
 into account individually in the estimation of esds in distances, angles
 and torsion angles; correlations between esds in cell parameters are only
 used when they are defined by crystal symmetry.  An approximate (isotropic)
 treatment of cell esds is used for estimating esds involving l.s. planes.
;

loop_
 _geom_bond_atom_site_label_1
 _geom_bond_atom_site_label_2
 _geom_bond_distance
 _geom_bond_site_symmetry_2
 _geom_bond_publ_flag
V1 N11 2.0500(9) . ?
V1 N12 2.0548(9) . ?
V1 C21 2.3019(10) . ?
V1 Cl1 2.3078(3) . ?
V1 C22 2.3093(10) . ?
V1 C23 2.3156(10) . ?
V1 C24 2.3213(10) . ?
V1 C20 2.3246(10) . ?
C10 N12 1.3327(13) . ?
C10 N11 1.3340(13) . ?
C10 C11 1.5102(14) . ?
C11 H11A 0.9800 . ?
C11 H11B 0.9800 . ?
C11 H11C 0.9800 . ?
N11 C12 1.4669(13) . ?
N12 C15 1.4630(13) . ?
C12 C13 1.5219(18) . ?
C12 C14 1.5261(18) . ?
C12 H12 1.0000 . ?
C13 H13A 0.9800 . ?
C13 H13B 0.9800 . ?
C13 H13C 0.9800 . ?
C14 H14A 0.9800 . ?
C14 H14B 0.9800 . ?
C14 H14C 0.9800 . ?
C15 C16 1.5203(17) . ?
C15 C17 1.5229(17) . ?
C15 H15 1.0000 . ?
C16 H16A 0.9800 . ?
C16 H16B 0.9800 . ?
C16 H16C 0.9800 . ?
C17 H17A 0.9800 . ?
C17 H17B 0.9800 . ?
C17 H17C 0.9800 . ?
C20 C24 1.4200(14) . ?
C20 C21 1.4219(15) . ?
C20 C25 1.4986(15) . ?
C21 C22 1.4265(15) . ?
C21 C26 1.5020(15) . ?
C22 C23 1.4224(15) . ?
C22 C27 1.5042(15) . ?
C23 C24 1.4243(14) . ?
C23 C28 1.5013(15) . ?
C24 C29 1.5025(15) . ?
C25 H25A 0.9800 . ?
C25 H25B 0.9800 . ?
C25 H25C 0.9800 . ?
C26 H26A 0.9800 . ?
C26 H26B 0.9800 . ?
C26 H26C 0.9800 . ?
C26 H26D 0.9800 . ?
C26 H26E 0.9800 . ?
C26 H26F 0.9800 . ?
C27 H27A 0.9800 . ?
C27 H27B 0.9800 . ?
C27 H27C 0.9800 . ?
C28 H28A 0.9800 . ?
C28 H28B 0.9800 . ?
C28 H28C 0.9800 . ?
C29 H29A 0.9800 . ?
C29 H29B 0.9800 . ?
C29 H29C 0.9800 . ?

loop_
 _geom_angle_atom_site_label_1
 _geom_angle_atom_site_label_2
 _geom_angle_atom_site_label_3
 _geom_angle
 _geom_angle_site_symmetry_1
 _geom_angle_site_symmetry_3
 _geom_angle_publ_flag
N11 V1 N12 64.69(4) . . ?
N11 V1 C21 106.70(4) . . ?
N12 V1 C21 98.08(4) . . ?
N11 V1 Cl1 100.24(3) . . ?
N12 V1 Cl1 100.45(3) . . ?
C21 V1 Cl1 151.93(3) . . ?
N11 V1 C22 141.87(4) . . ?
N12 V1 C22 104.55(4) . . ?
C21 V1 C22 36.04(4) . . ?
Cl1 V1 C22 117.87(3) . . ?
N11 V1 C23 151.87(4) . . ?
N12 V1 C23 137.44(4) . . ?
C21 V1 C23 59.75(4) . . ?
Cl1 V1 C23 92.55(3) . . ?
C22 V1 C23 35.82(4) . . ?
N11 V1 C24 116.45(4) . . ?
N12 V1 C24 157.55(4) . . ?
C21 V1 C24 59.62(4) . . ?
Cl1 V1 C24 101.27(3) . . ?
C22 V1 C24 59.70(4) . . ?
C23 V1 C24 35.78(4) . . ?
N11 V1 C20 94.68(4) . . ?
N12 V1 C20 123.98(4) . . ?
C21 V1 C20 35.79(4) . . ?
Cl1 V1 C20 135.25(3) . . ?
C22 V1 C20 59.72(4) . . ?
C23 V1 C20 59.48(4) . . ?
C24 V1 C20 35.59(4) . . ?
N12 C10 N11 110.87(9) . . ?
N12 C10 C11 124.32(10) . . ?
N11 C10 C11 124.79(10) . . ?
C10 C11 H11A 109.5 . . ?
C10 C11 H11B 109.5 . . ?
H11A C11 H11B 109.5 . . ?
C10 C11 H11C 109.5 . . ?
H11A C11 H11C 109.5 . . ?
H11B C11 H11C 109.5 . . ?
C10 N11 C12 121.68(9) . . ?
C10 N11 V1 92.08(6) . . ?
C12 N11 V1 142.55(7) . . ?
C10 N12 C15 122.46(9) . . ?
C10 N12 V1 91.91(6) . . ?
C15 N12 V1 143.30(7) . . ?
N11 C12 C13 108.84(9) . . ?
N11 C12 C14 112.96(10) . . ?
C13 C12 C14 110.54(11) . . ?
N11 C12 H12 108.1 . . ?
C13 C12 H12 108.1 . . ?
C14 C12 H12 108.1 . . ?
C12 C13 H13A 109.5 . . ?
C12 C13 H13B 109.5 . . ?
H13A C13 H13B 109.5 . . ?
C12 C13 H13C 109.5 . . ?
H13A C13 H13C 109.5 . . ?
H13B C13 H13C 109.5 . . ?
C12 C14 H14A 109.5 . . ?
C12 C14 H14B 109.5 . . ?
H14A C14 H14B 109.5 . . ?
C12 C14 H14C 109.5 . . ?
H14A C14 H14C 109.5 . . ?
H14B C14 H14C 109.5 . . ?
N12 C15 C16 109.12(9) . . ?
N12 C15 C17 111.68(10) . . ?
C16 C15 C17 110.99(11) . . ?
N12 C15 H15 108.3 . . ?
C16 C15 H15 108.3 . . ?
C17 C15 H15 108.3 . . ?
C15 C16 H16A 109.5 . . ?
C15 C16 H16B 109.5 . . ?
H16A C16 H16B 109.5 . . ?
C15 C16 H16C 109.5 . . ?
H16A C16 H16C 109.5 . . ?
H16B C16 H16C 109.5 . . ?
C15 C17 H17A 109.5 . . ?
C15 C17 H17B 109.5 . . ?
H17A C17 H17B 109.5 . . ?
C15 C17 H17C 109.5 . . ?
H17A C17 H17C 109.5 . . ?
H17B C17 H17C 109.5 . . ?
C24 C20 C21 107.95(9) . . ?
C24 C20 C25 127.04(10) . . ?
C21 C20 C25 124.82(10) . . ?
C24 C20 V1 72.08(6) . . ?
C21 C20 V1 71.23(6) . . ?
C25 C20 V1 126.22(7) . . ?
C20 C21 C22 108.18(9) . . ?
C20 C21 C26 125.23(10) . . ?
C22 C21 C26 126.28(10) . . ?
C20 C21 V1 72.98(6) . . ?
C22 C21 V1 72.26(6) . . ?
C26 C21 V1 125.53(8) . . ?
C23 C22 C21 107.67(9) . . ?
C23 C22 C27 126.44(10) . . ?
C21 C22 C27 125.49(10) . . ?
C23 C22 V1 72.33(6) . . ?
C21 C22 V1 71.70(6) . . ?
C27 C22 V1 127.22(8) . . ?
C22 C23 C24 108.12(9) . . ?
C22 C23 C28 127.11(10) . . ?
C24 C23 C28 124.67(10) . . ?
C22 C23 V1 71.85(6) . . ?
C24 C23 V1 72.33(6) . . ?
C28 C23 V1 124.36(7) . . ?
C20 C24 C23 108.06(9) . . ?
C20 C24 C29 127.34(10) . . ?
C23 C24 C29 124.53(10) . . ?
C20 C24 V1 72.33(6) . . ?
C23 C24 V1 71.89(6) . . ?
C29 C24 V1 123.79(7) . . ?
C20 C25 H25A 109.5 . . ?
C20 C25 H25B 109.5 . . ?
H25A C25 H25B 109.5 . . ?
C20 C25 H25C 109.5 . . ?
H25A C25 H25C 109.5 . . ?
H25B C25 H25C 109.5 . . ?
C21 C26 H26A 109.5 . . ?
C21 C26 H26B 109.5 . . ?
H26A C26 H26B 109.5 . . ?
C21 C26 H26C 109.5 . . ?
H26A C26 H26C 109.5 . . ?
H26B C26 H26C 109.5 . . ?
C21 C26 H26D 109.5 . . ?
H26A C26 H26D 141.1 . . ?
H26B C26 H26D 56.3 . . ?
H26C C26 H26D 56.3 . . ?
C21 C26 H26E 109.5 . . ?
H26A C26 H26E 56.3 . . ?
H26B C26 H26E 141.1 . . ?
H26C C26 H26E 56.3 . . ?
H26D C26 H26E 109.5 . . ?
C21 C26 H26F 109.5 . . ?
H26A C26 H26F 56.3 . . ?
H26B C26 H26F 56.3 . . ?
H26C C26 H26F 141.1 . . ?
H26D C26 H26F 109.5 . . ?
H26E C26 H26F 109.5 . . ?
C22 C27 H27A 109.5 . . ?
C22 C27 H27B 109.5 . . ?
H27A C27 H27B 109.5 . . ?
C22 C27 H27C 109.5 . . ?
H27A C27 H27C 109.5 . . ?
H27B C27 H27C 109.5 . . ?
C23 C28 H28A 109.5 . . ?
C23 C28 H28B 109.5 . . ?
H28A C28 H28B 109.5 . . ?
C23 C28 H28C 109.5 . . ?
H28A C28 H28C 109.5 . . ?
H28B C28 H28C 109.5 . . ?
C24 C29 H29A 109.5 . . ?
C24 C29 H29B 109.5 . . ?
H29A C29 H29B 109.5 . . ?
C24 C29 H29C 109.5 . . ?
H29A C29 H29C 109.5 . . ?
H29B C29 H29C 109.5 . . ?

loop_
 _geom_torsion_atom_site_label_1
 _geom_torsion_atom_site_label_2
 _geom_torsion_atom_site_label_3
 _geom_torsion_atom_site_label_4
 _geom_torsion
 _geom_torsion_site_symmetry_1
 _geom_torsion_site_symmetry_2
 _geom_torsion_site_symmetry_3
 _geom_torsion_site_symmetry_4
 _geom_torsion_publ_flag
N12 C10 N11 C12 -169.10(10) . . . . ?
C11 C10 N11 C12 9.70(16) . . . . ?
N12 C10 N11 V1 -6.17(9) . . . . ?
C11 C10 N11 V1 172.62(10) . . . . ?
N11 C10 N12 C15 172.56(9) . . . . ?
C11 C10 N12 C15 -6.23(16) . . . . ?
N11 C10 N12 V1 6.16(9) . . . . ?
C11 C10 N12 V1 -172.64(10) . . . . ?
C10 N11 C12 C13 145.63(11) . . . . ?
V1 N11 C12 C13 -5.51(18) . . . . ?
C10 N11 C12 C14 -91.20(13) . . . . ?
V1 N11 C12 C14 117.66(13) . . . . ?
C10 N12 C15 C16 -132.80(11) . . . . ?
V1 N12 C15 C16 24.05(17) . . . . ?
C10 N12 C15 C17 104.12(12) . . . . ?
V1 N12 C15 C17 -99.03(13) . . . . ?
C24 C20 C21 C22 -1.01(11) . . . . ?
C25 C20 C21 C22 174.26(10) . . . . ?
V1 C20 C21 C22 -64.15(7) . . . . ?
C24 C20 C21 C26 -175.01(10) . . . . ?
C25 C20 C21 C26 0.27(17) . . . . ?
V1 C20 C21 C26 121.85(11) . . . . ?
C24 C20 C21 V1 63.14(7) . . . . ?
C25 C20 C21 V1 -121.58(10) . . . . ?
C20 C21 C22 C23 0.78(11) . . . . ?
C26 C21 C22 C23 174.69(10) . . . . ?
V1 C21 C22 C23 -63.84(7) . . . . ?
C20 C21 C22 C27 -172.25(10) . . . . ?
C26 C21 C22 C27 1.66(17) . . . . ?
V1 C21 C22 C27 123.13(11) . . . . ?
C20 C21 C22 V1 64.62(7) . . . . ?
C26 C21 C22 V1 -121.47(11) . . . . ?
C21 C22 C23 C24 -0.25(11) . . . . ?
C27 C22 C23 C24 172.69(10) . . . . ?
V1 C22 C23 C24 -63.67(7) . . . . ?
C21 C22 C23 C28 -176.80(10) . . . . ?
C27 C22 C23 C28 -3.85(17) . . . . ?
V1 C22 C23 C28 119.78(11) . . . . ?
C21 C22 C23 V1 63.42(7) . . . . ?
C27 C22 C23 V1 -123.63(11) . . . . ?
C21 C20 C24 C23 0.86(11) . . . . ?
C25 C20 C24 C23 -174.28(10) . . . . ?
V1 C20 C24 C23 63.45(7) . . . . ?
C21 C20 C24 C29 177.99(10) . . . . ?
C25 C20 C24 C29 2.85(17) . . . . ?
V1 C20 C24 C29 -119.41(11) . . . . ?
C21 C20 C24 V1 -62.60(7) . . . . ?
C25 C20 C24 V1 122.26(11) . . . . ?
C22 C23 C24 C20 -0.37(11) . . . . ?
C28 C23 C24 C20 176.28(10) . . . . ?
V1 C23 C24 C20 -63.74(7) . . . . ?
C22 C23 C24 C29 -177.61(10) . . . . ?
C28 C23 C24 C29 -0.96(16) . . . . ?
V1 C23 C24 C29 119.03(10) . . . . ?
C22 C23 C24 V1 63.36(7) . . . . ?
C28 C23 C24 V1 -119.99(10) . . . . ?

_refine_diff_density_max    0.387
_refine_diff_density_min   -0.294
_refine_diff_density_rms    0.044
 
_diffrn_radiation_monochromator       graphite
_symmetry_cell_setting                Monoclinic
_symmetry_space_group_name_H-M        P21/n
_diffrn_orient_matrix_type            standard
_diffrn_orient_matrix_UB_11          -0.0222801
_diffrn_orient_matrix_UB_12          -0.1047009
_diffrn_orient_matrix_UB_13           0.0024537
_diffrn_orient_matrix_UB_21          -0.0159235
_diffrn_orient_matrix_UB_22           0.0016386
_diffrn_orient_matrix_UB_23          -0.0594685
_diffrn_orient_matrix_UB_31           0.0721078
_diffrn_orient_matrix_UB_32          -0.0319897
_diffrn_orient_matrix_UB_33          -0.0110876
_diffrn_measurement_specimen_support  'MiTeGen loop'
_diffrn_detector                      'CCD area detector'
_iucr_refine_instructions_details     'available on request'
_iucr_refine_reflections_details      'available on request'

#_______________________________________________________________________________
#
_publ_section_references
;
Bruker (2010). Apex2. Bruker AXS Inc., Madison, Wisconsin, USA.

Sheldrick, G. M. (2008). Acta Cryst. A64, 112-122.

Sheldrick, G. M. (2012). SHELXL-2012. University of G\"ottingen, Germany.
;
data_cmpd9a

_audit_creation_method            'SHELXL-97 & ZCIF'
_chemical_name_systematic
;
cmpd9a
;
_chemical_name_common             cmpd9a
_chemical_formula_moiety          'C36 H64 N6 O Ta2'
_chemical_formula_sum             'C36 H64 N6 O Ta2'
_chemical_formula_weight          958.83

loop_
 _atom_type_symbol
 _atom_type_description
 _atom_type_scat_dispersion_real
 _atom_type_scat_dispersion_imag
 _atom_type_scat_source
 'C'  'C'   0.0033   0.0016
 'International Tables Vol C Tables 4.2.6.8 and 6.1.1.4'
 'H'  'H'   0.0000   0.0000
 'International Tables Vol C Tables 4.2.6.8 and 6.1.1.4'
 'N'  'N'   0.0061   0.0033
 'International Tables Vol C Tables 4.2.6.8 and 6.1.1.4'
 'O'  'O'   0.0106   0.0060
 'International Tables Vol C Tables 4.2.6.8 and 6.1.1.4'
 'Ta'  'Ta'  -0.7052   6.5227
 'International Tables Vol C Tables 4.2.6.8 and 6.1.1.4'

_symmetry_cell_setting            Monoclinic
_symmetry_space_group_name_H-M    P21

loop_
 _symmetry_equiv_pos_as_xyz
 'x, y, z'
 '-x, y+1/2, -z'

_cell_length_a                    12.3334(16)
_cell_length_b                    18.228(2)
_cell_length_c                    16.578(2)
_cell_angle_alpha                 90.00
_cell_angle_beta                  90.162(2)
_cell_angle_gamma                 90.00
_cell_volume                      3726.9(8)
_cell_formula_units_Z             4
_cell_measurement_temperature     100(2)
_cell_measurement_reflns_used     9565
_cell_measurement_theta_min       2.4
_cell_measurement_theta_max       28.3

_exptl_crystal_description        needle
_exptl_crystal_colour             purple
_exptl_crystal_size_max           0.130
_exptl_crystal_size_mid           0.075
_exptl_crystal_size_min           0.050
_exptl_crystal_density_meas       ?
_exptl_crystal_density_diffrn     1.709
_exptl_crystal_density_method     'not measured'
_exptl_crystal_F_000              1904
_exptl_absorpt_coefficient_mu     5.904
_exptl_absorpt_correction_type    multi-scan
_exptl_absorpt_correction_T_min   0.580
_exptl_absorpt_correction_T_max   0.744
_exptl_absorpt_process_details    'SADABS (Sheldrick, 1996)'

_diffrn_ambient_temperature       100(2)
_diffrn_radiation_wavelength      0.71073
_diffrn_radiation_type            MoK\a
_diffrn_radiation_source          'fine-focus sealed tube'
_diffrn_radiation_monochromator   graphite
_diffrn_measurement_device_type   'three-circle diffractometer'
_diffrn_measurement_method        'omega scans'
_diffrn_detector_area_resol_mean  11.198
_diffrn_standards_decay_%         0
_diffrn_reflns_number             21445
_diffrn_reflns_av_R_equivalents   0.0289
_diffrn_reflns_av_sigmaI/netI     0.0580
_diffrn_reflns_limit_h_min        -15
_diffrn_reflns_limit_h_max        16
_diffrn_reflns_limit_k_min        -24
_diffrn_reflns_limit_k_max        16
_diffrn_reflns_limit_l_min        -15
_diffrn_reflns_limit_l_max        22
_diffrn_reflns_theta_min          1.99
_diffrn_reflns_theta_max          28.43
_reflns_number_total              13935
_reflns_number_gt                 12749
_reflns_threshold_expression      >2sigma(I)

_computing_data_collection        'Apex2 (Bruker, 2005)'
_computing_cell_refinement        Apex2
_computing_data_reduction         Apex2
_computing_structure_solution     'SHELXS-97 (Sheldrick, 1990)'
_computing_structure_refinement   'SHELXL-97 (Sheldrick, 1997)'
_computing_molecular_graphics     'XSHEL (Bruker, 2004)'
_computing_publication_material   SHELXL-97

_refine_special_details
;
 Refinement of F^2^ against ALL reflections.  The weighted R-factor wR and
 goodness of fit S are based on F^2^, conventional R-factors R are based
 on F, with F set to zero for negative F^2^. The threshold expression of
 F^2^ > 2sigma(F^2^) is used only for calculating R-factors(gt) etc. and is
 not relevant to the choice of reflections for refinement.  R-factors based
 on F^2^ are statistically about twice as large as those based on F, and R-
 factors based on ALL data will be even larger.

Twinning:

1) Non-merohedral twinning (components 1 & 2, refined as merohedral twinning 
by reflection in ab plane). It is actually pseudo-merohedral because of 
monoclinic angle \b being close to 90 deg.

2) Merohedral twinning/racemic mixture possible because of 
non-centrosymmetric group and refined as components 3 & 4 that inversion 
of components 1 & 2 respectively.

3) Scale factors refined for components 1 - 4 are: 0.30(1), 0.22(1), 0.28(1) 
and 0.20(1)

Restraints and Constraints:

1) H-atoms wereconstrained geometry as riding on attached atom (A) with 
isoptropic atomic displacement parameters set as Uiso(H)=1.5Uiso(A) for CH3 
and 1.2Uiso(A) for other groups

2) Two independent Ta_2_ -complexes which are related to each other by 
pseudo-symmetry element - 21 screw axis parallel to c axis. 
This quite accurately transform complexes into each other with the exception 
of iso-propyl groups which have different orientation in two independent 
complexes. The presence of this pseudo-symmetry makes this structure 
pseudo-orthorhombic causing pseudo-merohedral symmetry described above.

Because of the pseudo-symmetry the correlation between two independent 
molecules especially between anisotropic displacement parameters is quite 
high. On the other hand pseudo-symmetry is almost exact with the exception 
of flexible iso-proplyl group which orientations also slightly affects 
Me_5_ Cp ligands as well, the following constraints and restraints were 
used:

a) anisotropic parameters of Ta and coordinating N and O atoms were 
constrained to be the same taking into account 2 fold rotation around 
c-axis (all Uij are the same but U13 and U23 change signs);

b) anisotropic parameters of atoms in rigid group (e.g. iso-propyl,
Me_5_ Cp) were restrained using rigid body restrains (DELU)
;

_refine_ls_structure_factor_coef  Fsqd
_refine_ls_matrix_type            full
_refine_ls_weighting_scheme       calc
_refine_ls_weighting_details
'w=1/[\s^2^(Fo^2^)+(0.044P)^2^+4.95P], P=(max(Fo^2^,0)+2Fc^2^)/3'
_atom_sites_solution_primary      direct
_atom_sites_solution_secondary    difmap
_atom_sites_solution_hydrogens    geom
_refine_ls_hydrogen_treatment     constr
_refine_ls_extinction_method      none
_refine_ls_extinction_coef        ?
_refine_ls_abs_structure_details  '(Flack, 1983)'
_refine_ls_abs_structure_Flack    0.51(1)
_refine_ls_number_reflns          13935   # 9407 w/o Fiedel pairs
_refine_ls_number_parameters      788
_refine_ls_number_restraints      174
_refine_ls_R_factor_all           0.0463
_refine_ls_R_factor_gt            0.0384
_refine_ls_wR_factor_ref          0.0834
_refine_ls_wR_factor_gt           0.0804
_refine_ls_goodness_of_fit_ref    1.001
_refine_ls_restrained_S_all       0.994
_refine_ls_shift/su_max           0.001
_refine_ls_shift/su_mean          0.000

loop_
 _atom_site_label
 _atom_site_type_symbol
 _atom_site_fract_x
 _atom_site_fract_y
 _atom_site_fract_z
 _atom_site_U_iso_or_equiv
 _atom_site_adp_type
 _atom_site_occupancy
 _atom_site_symmetry_multiplicity
 _atom_site_calc_flag
 _atom_site_refinement_flags
 _atom_site_disorder_assembly
 _atom_site_disorder_group
Ta1 Ta 0.83946(4) 0.30297(2) 0.51884(3) 0.01533(6) Uani 1 1 d . . .
Ta2 Ta 0.64910(4) 0.22698(2) 0.46129(3) 0.01476(6) Uani 1 1 d . . .
O12 O 0.6825(7) 0.3240(4) 0.5073(5) 0.0157(11) Uani 1 1 d . . .
N1 N 0.8115(10) 0.1998(7) 0.5212(6) 0.0196(13) Uani 1 1 d U . .
N2 N 0.7985(8) 0.2098(6) 0.4324(6) 0.0147(13) Uani 1 1 d U . .
N11 N 0.8810(10) 0.3946(6) 0.4292(7) 0.0227(13) Uani 1 1 d U . .
N12 N 0.9838(8) 0.2959(7) 0.4436(6) 0.0199(12) Uani 1 1 d U . .
C10 C 0.9729(11) 0.3616(8) 0.4085(7) 0.0222(15) Uani 1 1 d U . .
C11 C 1.0559(13) 0.3980(10) 0.3546(10) 0.036(3) Uani 1 1 d U . .
H11A H 1.0359 0.3902 0.2980 0.055 Uiso 1 1 calc R . .
H11B H 1.1275 0.3765 0.3649 0.055 Uiso 1 1 calc R . .
H11C H 1.0581 0.4507 0.3660 0.055 Uiso 1 1 calc R . .
C12 C 0.8579(13) 0.4727(7) 0.4115(7) 0.028(2) Uani 1 1 d U . .
H12 H 0.9242 0.5015 0.4259 0.033 Uiso 1 1 calc R . .
C13 C 0.7701(14) 0.4988(7) 0.4621(9) 0.035(3) Uani 1 1 d U . .
H13A H 0.7049 0.4696 0.4517 0.053 Uiso 1 1 calc R . .
H13B H 0.7553 0.5505 0.4499 0.053 Uiso 1 1 calc R . .
H13C H 0.7909 0.4940 0.5190 0.053 Uiso 1 1 calc R . .
C14 C 0.8336(15) 0.4868(9) 0.3208(8) 0.036(4) Uani 1 1 d U . .
H14A H 0.7689 0.4592 0.3047 0.054 Uiso 1 1 calc R . .
H14B H 0.8955 0.4709 0.2883 0.054 Uiso 1 1 calc R . .
H14C H 0.8210 0.5393 0.3121 0.054 Uiso 1 1 calc R . .
C15 C 1.0617(10) 0.2422(9) 0.4131(8) 0.027(2) Uani 1 1 d U . .
H15 H 1.1340 0.2666 0.4094 0.032 Uiso 1 1 calc R . .
C16 C 1.0727(13) 0.1761(9) 0.4701(10) 0.038(4) Uani 1 1 d U . .
H16A H 1.0973 0.1930 0.5232 0.058 Uiso 1 1 calc R . .
H16B H 1.1256 0.1415 0.4480 0.058 Uiso 1 1 calc R . .
H16C H 1.0022 0.1518 0.4755 0.058 Uiso 1 1 calc R . .
C17 C 1.0300(15) 0.2155(11) 0.3286(9) 0.044(4) Uani 1 1 d U . .
H17A H 0.9601 0.1901 0.3311 0.066 Uiso 1 1 calc R . .
H17B H 1.0856 0.1818 0.3085 0.066 Uiso 1 1 calc R . .
H17C H 1.0241 0.2577 0.2921 0.066 Uiso 1 1 calc R . .
N21 N 0.5445(10) 0.1922(6) 0.5668(7) 0.0187(12) Uani 1 1 d U . .
N22 N 0.6377(9) 0.1101(6) 0.4963(7) 0.0235(13) Uani 1 1 d U . .
C20 C 0.5803(11) 0.1213(7) 0.5612(7) 0.0182(14) Uani 1 1 d U . .
C21 C 0.5522(12) 0.0673(7) 0.6263(8) 0.022(2) Uani 1 1 d U . .
H21A H 0.4820 0.0446 0.6141 0.034 Uiso 1 1 calc R . .
H21B H 0.5482 0.0927 0.6782 0.034 Uiso 1 1 calc R . .
H21C H 0.6082 0.0292 0.6290 0.034 Uiso 1 1 calc R . .
C22 C 0.4763(11) 0.2196(8) 0.6295(8) 0.023(2) Uani 1 1 d U . .
H22 H 0.5106 0.2065 0.6823 0.027 Uiso 1 1 calc R . .
C23 C 0.4718(13) 0.3054(8) 0.6239(8) 0.027(3) Uani 1 1 d U . .
H23A H 0.5411 0.3260 0.6420 0.041 Uiso 1 1 calc R . .
H23B H 0.4133 0.3239 0.6584 0.041 Uiso 1 1 calc R . .
H23C H 0.4581 0.3201 0.5679 0.041 Uiso 1 1 calc R . .
C24 C 0.3630(11) 0.1872(8) 0.6285(8) 0.026(3) Uani 1 1 d U . .
H24A H 0.3223 0.2070 0.5825 0.039 Uiso 1 1 calc R . .
H24B H 0.3257 0.1998 0.6787 0.039 Uiso 1 1 calc R . .
H24C H 0.3677 0.1337 0.6235 0.039 Uiso 1 1 calc R . .
C25 C 0.7024(10) 0.0441(7) 0.4776(8) 0.026(2) Uani 1 1 d U . .
H25 H 0.7444 0.0571 0.4281 0.031 Uiso 1 1 calc R . .
C26 C 0.7869(13) 0.0241(7) 0.5399(10) 0.039(4) Uani 1 1 d U . .
H26A H 0.8285 0.0679 0.5547 0.059 Uiso 1 1 calc R . .
H26B H 0.8359 -0.0130 0.5176 0.059 Uiso 1 1 calc R . .
H26C H 0.7511 0.0043 0.5880 0.059 Uiso 1 1 calc R . .
C27 C 0.6324(12) -0.0216(7) 0.4532(9) 0.026(3) Uani 1 1 d U . .
H27A H 0.5874 -0.0365 0.4990 0.039 Uiso 1 1 calc R . .
H27B H 0.6793 -0.0625 0.4373 0.039 Uiso 1 1 calc R . .
H27C H 0.5857 -0.0078 0.4078 0.039 Uiso 1 1 calc R . .
C50 C 0.5101(12) 0.1838(7) 0.3586(8) 0.023(2) Uani 1 1 d U . .
C51 C 0.6105(11) 0.1882(8) 0.3220(8) 0.022(2) Uani 1 1 d U . .
C52 C 0.6416(11) 0.2630(7) 0.3196(7) 0.018(2) Uani 1 1 d U . .
C53 C 0.5570(10) 0.3045(8) 0.3576(7) 0.0182(19) Uani 1 1 d U . .
C54 C 0.4786(11) 0.2541(7) 0.3836(7) 0.0180(19) Uani 1 1 d U . .
C55 C 0.4402(12) 0.1165(8) 0.3677(8) 0.029(3) Uani 1 1 d U . .
H55A H 0.3808 0.1183 0.3284 0.043 Uiso 1 1 calc R . .
H55B H 0.4103 0.1150 0.4224 0.043 Uiso 1 1 calc R . .
H55C H 0.4841 0.0726 0.3583 0.043 Uiso 1 1 calc R . .
C56 C 0.6750(12) 0.1277(7) 0.2819(7) 0.025(2) Uani 1 1 d U . .
H56A H 0.6606 0.0810 0.3091 0.038 Uiso 1 1 calc R . .
H56B H 0.7526 0.1390 0.2855 0.038 Uiso 1 1 calc R . .
H56C H 0.6537 0.1239 0.2250 0.038 Uiso 1 1 calc R . .
C57 C 0.7408(11) 0.2913(8) 0.2795(7) 0.020(2) Uani 1 1 d U . .
H57A H 0.8031 0.2853 0.3157 0.030 Uiso 1 1 calc R . .
H57B H 0.7312 0.3434 0.2668 0.030 Uiso 1 1 calc R . .
H57C H 0.7534 0.2638 0.2296 0.030 Uiso 1 1 calc R . .
C58 C 0.5520(12) 0.3839(8) 0.3673(9) 0.026(3) Uani 1 1 d U . .
H58A H 0.4765 0.4002 0.3631 0.039 Uiso 1 1 calc R . .
H58B H 0.5952 0.4074 0.3251 0.039 Uiso 1 1 calc R . .
H58C H 0.5811 0.3974 0.4204 0.039 Uiso 1 1 calc R . .
C59 C 0.3682(11) 0.2749(9) 0.4137(8) 0.028(3) Uani 1 1 d U . .
H59A H 0.3741 0.3179 0.4489 0.042 Uiso 1 1 calc R . .
H59B H 0.3372 0.2338 0.4441 0.042 Uiso 1 1 calc R . .
H59C H 0.3210 0.2864 0.3677 0.042 Uiso 1 1 calc R . .
C60 C 0.9922(12) 0.3296(8) 0.6185(9) 0.025(2) Uani 1 1 d U . .
C61 C 0.9327(11) 0.2698(8) 0.6470(9) 0.023(2) Uani 1 1 d U . .
C62 C 0.8289(11) 0.2928(7) 0.6644(7) 0.022(2) Uani 1 1 d U . .
C63 C 0.8199(11) 0.3695(7) 0.6497(7) 0.0219(19) Uani 1 1 d U . .
C64 C 0.9217(12) 0.3922(8) 0.6213(8) 0.024(2) Uani 1 1 d U . .
C65 C 1.1097(11) 0.3356(9) 0.5980(9) 0.032(3) Uani 1 1 d U . .
H65A H 1.1479 0.2917 0.6171 0.047 Uiso 1 1 calc R . .
H65B H 1.1405 0.3792 0.6241 0.047 Uiso 1 1 calc R . .
H65C H 1.1178 0.3398 0.5394 0.047 Uiso 1 1 calc R . .
C66 C 0.9745(12) 0.1922(8) 0.6667(8) 0.026(3) Uani 1 1 d U . .
H66A H 0.9637 0.1820 0.7241 0.039 Uiso 1 1 calc R . .
H66B H 1.0520 0.1891 0.6539 0.039 Uiso 1 1 calc R . .
H66C H 0.9345 0.1561 0.6344 0.039 Uiso 1 1 calc R . .
C67 C 0.7437(11) 0.2442(8) 0.7017(7) 0.021(2) Uani 1 1 d U . .
H67A H 0.7423 0.1969 0.6737 0.032 Uiso 1 1 calc R . .
H67B H 0.6725 0.2678 0.6969 0.032 Uiso 1 1 calc R . .
H67C H 0.7608 0.2364 0.7589 0.032 Uiso 1 1 calc R . .
C68 C 0.7203(12) 0.4173(8) 0.6629(9) 0.028(3) Uani 1 1 d U . .
H68A H 0.7430 0.4682 0.6720 0.042 Uiso 1 1 calc R . .
H68B H 0.6803 0.3996 0.7100 0.042 Uiso 1 1 calc R . .
H68C H 0.6734 0.4149 0.6151 0.042 Uiso 1 1 calc R . .
C69 C 0.9604(13) 0.4693(8) 0.6100(9) 0.031(3) Uani 1 1 d U . .
H69A H 0.9028 0.5035 0.6253 0.046 Uiso 1 1 calc R . .
H69B H 0.9796 0.4770 0.5534 0.046 Uiso 1 1 calc R . .
H69C H 1.0243 0.4777 0.6441 0.046 Uiso 1 1 calc R . .
Ta3 Ta 0.33272(4) 0.36041(2) 0.96299(3) 0.01533(6) Uani 1 1 d . . .
Ta4 Ta 0.15680(4) 0.44776(2) 1.02433(3) 0.01476(6) Uani 1 1 d . . .
O34 O 0.1771(7) 0.3474(4) 0.9798(5) 0.0157(11) Uani 1 1 d . . .
N3 N 0.3139(9) 0.4664(7) 0.9594(6) 0.0196(13) Uani 1 1 d . . .
N4 N 0.3103(8) 0.4550(6) 1.0494(6) 0.0147(13) Uani 1 1 d . . .
N31 N 0.3697(9) 0.2678(6) 1.0523(7) 0.0227(13) Uani 1 1 d U . .
N32 N 0.4844(8) 0.3584(6) 1.0328(6) 0.0199(12) Uani 1 1 d U . .
C30 C 0.4688(11) 0.2926(8) 1.0682(7) 0.0222(15) Uani 1 1 d U . .
C31 C 0.5576(13) 0.2534(8) 1.1158(9) 0.032(3) Uani 1 1 d U . .
H31A H 0.5457 0.2606 1.1737 0.049 Uiso 1 1 calc R . .
H31B H 0.6285 0.2735 1.1008 0.049 Uiso 1 1 calc R . .
H31C H 0.5557 0.2008 1.1034 0.049 Uiso 1 1 calc R . .
C32 C 0.3441(15) 0.1887(7) 1.0691(7) 0.027(2) Uani 1 1 d U . .
H32 H 0.4052 0.1571 1.0501 0.033 Uiso 1 1 calc R . .
C33 C 0.2415(11) 0.1689(8) 1.0233(8) 0.026(3) Uani 1 1 d U . .
H33A H 0.1804 0.1969 1.0451 0.039 Uiso 1 1 calc R . .
H33B H 0.2271 0.1163 1.0293 0.039 Uiso 1 1 calc R . .
H33C H 0.2507 0.1807 0.9661 0.039 Uiso 1 1 calc R . .
C34 C 0.3270(16) 0.1768(8) 1.1602(8) 0.035(4) Uani 1 1 d U . .
H34A H 0.2558 0.1958 1.1758 0.052 Uiso 1 1 calc R . .
H34B H 0.3837 0.2027 1.1904 0.052 Uiso 1 1 calc R . .
H34C H 0.3307 0.1242 1.1724 0.052 Uiso 1 1 calc R . .
C35 C 0.5728(10) 0.4091(7) 1.0607(9) 0.025(2) Uani 1 1 d U . .
H35 H 0.6429 0.3815 1.0602 0.030 Uiso 1 1 calc R . .
C36 C 0.5824(14) 0.4737(8) 1.0040(10) 0.034(3) Uani 1 1 d U . .
H36A H 0.6117 0.4571 0.9522 0.051 Uiso 1 1 calc R . .
H36B H 0.6311 0.5105 1.0276 0.051 Uiso 1 1 calc R . .
H36C H 0.5106 0.4955 0.9954 0.051 Uiso 1 1 calc R . .
C37 C 0.5519(14) 0.4363(9) 1.1471(10) 0.036(4) Uani 1 1 d U . .
H37A H 0.6143 0.4650 1.1658 0.054 Uiso 1 1 calc R . .
H37B H 0.5414 0.3941 1.1829 0.054 Uiso 1 1 calc R . .
H37C H 0.4868 0.4671 1.1477 0.054 Uiso 1 1 calc R . .
N41 N 0.0449(10) 0.4846(6) 0.9240(7) 0.0187(13) Uani 1 1 d U . .
N42 N 0.1447(9) 0.5664(5) 0.9855(6) 0.0235(13) Uani 1 1 d U . .
C40 C 0.0824(11) 0.5513(7) 0.9237(8) 0.0182(14) Uani 1 1 d U . .
C41 C 0.0590(14) 0.6059(8) 0.8546(8) 0.031(3) Uani 1 1 d U . .
H41A H 0.0175 0.6476 0.8755 0.046 Uiso 1 1 calc R . .
H41B H 0.0169 0.5813 0.8123 0.046 Uiso 1 1 calc R . .
H41C H 0.1276 0.6235 0.8321 0.046 Uiso 1 1 calc R . .
C42 C -0.0316(11) 0.4551(8) 0.8612(9) 0.026(2) Uani 1 1 d U . .
H42 H 0.0008 0.4657 0.8072 0.031 Uiso 1 1 calc R . .
C43 C -0.0433(12) 0.3740(7) 0.8682(9) 0.024(3) Uani 1 1 d U . .
H43A H -0.0838 0.3621 0.9173 0.037 Uiso 1 1 calc R . .
H43B H 0.0287 0.3514 0.8708 0.037 Uiso 1 1 calc R . .
H43C H -0.0825 0.3551 0.8210 0.037 Uiso 1 1 calc R . .
C44 C -0.1409(13) 0.4915(9) 0.8637(8) 0.033(3) Uani 1 1 d U . .
H44A H -0.1897 0.4675 0.8251 0.050 Uiso 1 1 calc R . .
H44B H -0.1333 0.5435 0.8494 0.050 Uiso 1 1 calc R . .
H44C H -0.1710 0.4874 0.9181 0.050 Uiso 1 1 calc R . .
C45 C 0.2120(12) 0.6358(7) 0.9873(9) 0.031(3) Uani 1 1 d U . .
H45 H 0.2265 0.6509 0.9304 0.037 Uiso 1 1 calc R . .
C46 C 0.3208(12) 0.6239(8) 1.0296(10) 0.040(3) Uani 1 1 d U . .
H46A H 0.3083 0.6044 1.0839 0.060 Uiso 1 1 calc R . .
H46B H 0.3595 0.6707 1.0334 0.060 Uiso 1 1 calc R . .
H46C H 0.3643 0.5889 0.9986 0.060 Uiso 1 1 calc R . .
C47 C 0.1530(17) 0.6986(8) 1.0296(10) 0.047(4) Uani 1 1 d U . .
H47A H 0.0759 0.6974 1.0150 0.071 Uiso 1 1 calc R . .
H47B H 0.1844 0.7455 1.0126 0.071 Uiso 1 1 calc R . .
H47C H 0.1607 0.6932 1.0881 0.071 Uiso 1 1 calc R . .
C70 C 0.4695(12) 0.3232(7) 0.8595(7) 0.020(2) Uani 1 1 d U . .
C71 C 0.4188(11) 0.3898(7) 0.8321(7) 0.019(2) Uani 1 1 d U . .
C72 C 0.3060(10) 0.3707(7) 0.8176(7) 0.019(2) Uani 1 1 d U . .
C73 C 0.2906(11) 0.2941(7) 0.8339(7) 0.0213(19) Uani 1 1 d U . .
C74 C 0.3906(12) 0.2663(8) 0.8593(8) 0.025(2) Uani 1 1 d U . .
C75 C 0.5913(11) 0.3122(8) 0.8735(8) 0.028(3) Uani 1 1 d U . .
H75A H 0.6076 0.3171 0.9311 0.041 Uiso 1 1 calc R . .
H75B H 0.6319 0.3493 0.8432 0.041 Uiso 1 1 calc R . .
H75C H 0.6124 0.2632 0.8550 0.041 Uiso 1 1 calc R . .
C76 C 0.4686(11) 0.4607(8) 0.8103(9) 0.026(3) Uani 1 1 d U . .
H76A H 0.5431 0.4624 0.8309 0.039 Uiso 1 1 calc R . .
H76B H 0.4265 0.5008 0.8340 0.039 Uiso 1 1 calc R . .
H76C H 0.4693 0.4659 0.7514 0.039 Uiso 1 1 calc R . .
C77 C 0.2264(12) 0.4261(8) 0.7832(8) 0.024(3) Uani 1 1 d U . .
H77A H 0.1536 0.4045 0.7820 0.037 Uiso 1 1 calc R . .
H77B H 0.2481 0.4393 0.7283 0.037 Uiso 1 1 calc R . .
H77C H 0.2259 0.4701 0.8171 0.037 Uiso 1 1 calc R . .
C78 C 0.1862(13) 0.2527(8) 0.8210(9) 0.032(3) Uani 1 1 d U . .
H78A H 0.2022 0.2039 0.7994 0.048 Uiso 1 1 calc R . .
H78B H 0.1404 0.2796 0.7827 0.048 Uiso 1 1 calc R . .
H78C H 0.1480 0.2478 0.8725 0.048 Uiso 1 1 calc R . .
C79 C 0.4209(12) 0.1841(7) 0.8696(9) 0.030(3) Uani 1 1 d U . .
H79A H 0.3554 0.1539 0.8646 0.045 Uiso 1 1 calc R . .
H79B H 0.4535 0.1765 0.9230 0.045 Uiso 1 1 calc R . .
H79C H 0.4729 0.1699 0.8278 0.045 Uiso 1 1 calc R . .
C80 C 0.0298(12) 0.4998(8) 1.1300(7) 0.021(2) Uani 1 1 d U . .
C81 C 0.1344(11) 0.4870(8) 1.1655(7) 0.021(2) Uani 1 1 d U . .
C82 C 0.1585(12) 0.4113(7) 1.1655(7) 0.0202(19) Uani 1 1 d U . .
C83 C 0.0656(12) 0.3747(7) 1.1293(7) 0.020(2) Uani 1 1 d U . .
C84 C -0.0127(12) 0.4297(8) 1.1058(8) 0.024(2) Uani 1 1 d U . .
C85 C -0.0332(14) 0.5704(8) 1.1217(9) 0.034(3) Uani 1 1 d U . .
H85A H 0.0124 0.6116 1.1388 0.051 Uiso 1 1 calc R . .
H85B H -0.0980 0.5681 1.1556 0.051 Uiso 1 1 calc R . .
H85C H -0.0547 0.5772 1.0652 0.051 Uiso 1 1 calc R . .
C86 C 0.2065(12) 0.5438(9) 1.2073(8) 0.029(3) Uani 1 1 d U . .
H86A H 0.1984 0.5394 1.2659 0.044 Uiso 1 1 calc R . .
H86B H 0.1850 0.5932 1.1903 0.044 Uiso 1 1 calc R . .
H86C H 0.2824 0.5352 1.1927 0.044 Uiso 1 1 calc R . .
C87 C 0.2535(12) 0.3732(10) 1.2049(10) 0.034(3) Uani 1 1 d U . .
H87A H 0.3154 0.4068 1.2072 0.051 Uiso 1 1 calc R . .
H87B H 0.2730 0.3297 1.1734 0.051 Uiso 1 1 calc R . .
H87C H 0.2336 0.3583 1.2598 0.051 Uiso 1 1 calc R . .
C88 C 0.0439(14) 0.2933(8) 1.1191(8) 0.030(3) Uani 1 1 d U . .
H88A H 0.1095 0.2656 1.1328 0.045 Uiso 1 1 calc R . .
H88B H 0.0236 0.2833 1.0630 0.045 Uiso 1 1 calc R . .
H88C H -0.0153 0.2785 1.1548 0.045 Uiso 1 1 calc R . .
C89 C -0.1264(11) 0.4149(9) 1.0780(9) 0.029(3) Uani 1 1 d U . .
H89A H -0.1285 0.3686 1.0480 0.044 Uiso 1 1 calc R . .
H89B H -0.1507 0.4550 1.0429 0.044 Uiso 1 1 calc R . .
H89C H -0.1744 0.4116 1.1249 0.044 Uiso 1 1 calc R . .

loop_
 _atom_site_aniso_label
 _atom_site_aniso_U_11
 _atom_site_aniso_U_22
 _atom_site_aniso_U_33
 _atom_site_aniso_U_23
 _atom_site_aniso_U_13
 _atom_site_aniso_U_12
Ta1 0.01768(12) 0.01440(13) 0.01391(13) 0.00056(13) -0.00002(18) -0.00255(11)
Ta2 0.01595(12) 0.01316(12) 0.01516(14) -0.00106(12) 0.00063(17) -0.00064(11)
O12 0.018(2) 0.013(2) 0.016(3) -0.005(2) 0.001(2) 0.0006(18)
N1 0.020(3) 0.027(3) 0.011(2) -0.004(3) 0.002(3) -0.005(2)
N2 0.015(3) 0.015(3) 0.014(3) 0.004(3) 0.000(2) -0.006(2)
N11 0.026(2) 0.017(2) 0.025(4) 0.005(2) -0.004(2) -0.0062(19)
N12 0.013(2) 0.026(3) 0.020(4) 0.001(2) 0.000(2) -0.0038(19)
C10 0.027(3) 0.026(3) 0.013(4) 0.000(3) 0.000(3) -0.007(2)
C11 0.030(6) 0.043(8) 0.036(8) 0.012(6) 0.003(5) -0.014(5)
C12 0.041(7) 0.018(3) 0.025(5) 0.009(5) -0.013(5) -0.009(5)
C13 0.062(10) 0.012(5) 0.032(6) 0.004(6) -0.008(6) 0.004(5)
C14 0.051(10) 0.032(7) 0.025(4) 0.016(4) -0.012(6) -0.024(7)
C15 0.009(5) 0.041(7) 0.030(6) -0.007(4) 0.003(5) -0.003(4)
C16 0.035(8) 0.044(7) 0.036(6) -0.004(6) 0.017(7) 0.026(6)
C17 0.040(9) 0.063(13) 0.029(5) -0.016(5) 0.006(6) 0.004(8)
N21 0.026(3) 0.009(2) 0.021(3) 0.003(2) 0.008(2) -0.008(2)
N22 0.029(3) 0.014(2) 0.027(3) 0.000(2) 0.007(2) -0.003(2)
C20 0.022(3) 0.013(2) 0.020(3) 0.002(2) 0.000(3) -0.003(2)
C21 0.025(7) 0.012(4) 0.031(6) 0.007(4) 0.005(5) -0.002(5)
C22 0.017(5) 0.028(5) 0.023(6) -0.002(5) 0.000(4) 0.004(5)
C23 0.035(8) 0.027(4) 0.020(6) -0.008(5) 0.008(6) 0.004(4)
C24 0.015(4) 0.033(6) 0.030(7) 0.004(6) -0.002(4) 0.006(4)
C25 0.030(6) 0.021(4) 0.026(6) -0.001(5) 0.003(4) 0.003(2)
C26 0.054(8) 0.011(6) 0.054(9) 0.010(6) -0.021(6) -0.005(4)
C27 0.029(6) 0.015(3) 0.034(7) -0.004(5) 0.000(5) 0.009(4)
C50 0.032(6) 0.019(3) 0.020(6) -0.002(5) 0.004(5) -0.004(3)
C51 0.024(5) 0.016(3) 0.025(7) -0.003(5) -0.001(4) 0.002(3)
C52 0.016(5) 0.016(3) 0.023(6) -0.001(4) -0.005(4) 0.003(3)
C53 0.019(4) 0.018(3) 0.017(5) -0.009(5) -0.005(4) -0.001(3)
C54 0.023(4) 0.020(3) 0.011(5) 0.003(4) -0.002(4) 0.003(3)
C55 0.035(6) 0.026(4) 0.025(7) 0.000(5) -0.003(5) -0.010(4)
C56 0.038(6) 0.019(4) 0.019(5) -0.005(4) 0.000(5) 0.005(5)
C57 0.018(5) 0.023(5) 0.018(6) 0.000(5) -0.005(4) 0.000(4)
C58 0.025(7) 0.018(3) 0.036(8) -0.002(5) 0.004(5) 0.004(4)
C59 0.024(4) 0.038(7) 0.023(7) 0.002(5) 0.003(5) 0.004(4)
C60 0.028(4) 0.019(3) 0.030(7) -0.001(5) 0.001(5) -0.008(3)
C61 0.021(4) 0.018(3) 0.031(7) 0.002(5) -0.009(5) -0.008(3)
C62 0.024(4) 0.020(3) 0.022(6) 0.001(4) -0.005(5) -0.006(3)
C63 0.034(4) 0.020(3) 0.012(5) -0.001(4) 0.001(5) -0.002(3)
C64 0.036(5) 0.018(3) 0.018(6) 0.001(5) 0.001(5) -0.005(3)
C65 0.028(4) 0.034(7) 0.033(8) 0.005(6) 0.001(6) -0.010(4)
C66 0.031(6) 0.023(4) 0.025(7) 0.007(5) -0.009(6) -0.002(4)
C67 0.033(5) 0.023(5) 0.007(5) -0.002(5) 0.003(5) -0.005(4)
C68 0.035(5) 0.022(5) 0.027(7) -0.018(5) -0.005(5) -0.001(4)
C69 0.039(7) 0.018(3) 0.036(8) -0.005(6) -0.006(6) -0.009(4)
Ta3 0.01768(12) 0.01440(13) 0.01391(13) 0.00056(13) 0.00002(18) 0.00255(11)
Ta4 0.01595(12) 0.01316(12) 0.01516(14) -0.00106(12) -0.00063(17) 0.00064(11)
O34 0.018(2) 0.013(2) 0.016(3) -0.005(2) -0.001(2) -0.0006(18)
N3 0.020(3) 0.027(3) 0.011(2) -0.004(3) -0.002(3) 0.005(2)
N4 0.015(3) 0.015(3) 0.014(3) 0.004(3) 0.000(2) 0.006(2)
N31 0.026(2) 0.017(2) 0.025(4) 0.005(2) 0.004(2) 0.0062(19)
N32 0.013(2) 0.026(3) 0.020(4) 0.001(2) 0.000(2) 0.0038(19)
C30 0.027(3) 0.026(3) 0.013(4) 0.000(3) 0.000(3) 0.007(2)
C31 0.037(5) 0.026(6) 0.035(8) -0.001(5) -0.010(5) 0.012(5)
C32 0.039(7) 0.020(4) 0.023(4) 0.006(5) -0.003(5) -0.001(6)
C33 0.032(7) 0.027(6) 0.019(5) 0.003(5) 0.005(5) -0.003(4)
C34 0.055(11) 0.027(7) 0.023(4) 0.007(4) -0.004(6) -0.008(7)
C35 0.015(5) 0.011(5) 0.048(6) 0.001(4) 0.009(5) 0.002(3)
C36 0.046(9) 0.017(5) 0.039(6) 0.003(5) -0.015(7) -0.001(4)
C37 0.037(9) 0.034(9) 0.037(5) -0.002(5) -0.014(6) -0.010(7)
N41 0.026(3) 0.009(2) 0.021(3) 0.003(2) -0.008(2) 0.008(2)
N42 0.029(3) 0.014(2) 0.027(3) 0.000(2) -0.007(2) 0.003(2)
C40 0.022(3) 0.013(2) 0.020(3) 0.002(2) 0.000(3) 0.003(2)
C41 0.048(10) 0.016(5) 0.028(6) 0.009(4) -0.007(5) -0.001(6)
C42 0.019(5) 0.019(4) 0.039(7) 0.005(5) -0.012(5) -0.003(5)
C43 0.017(7) 0.019(4) 0.037(8) 0.003(5) -0.007(5) -0.004(4)
C44 0.033(5) 0.035(7) 0.031(7) -0.016(6) -0.018(6) 0.016(6)
C45 0.039(6) 0.016(5) 0.039(8) 0.005(5) 0.000(5) -0.002(3)
C46 0.039(6) 0.023(7) 0.058(10) 0.010(7) -0.009(7) -0.015(4)
C47 0.063(10) 0.017(4) 0.062(10) -0.011(6) -0.004(10) 0.002(6)
C70 0.033(3) 0.018(3) 0.008(5) 0.002(4) 0.002(4) 0.007(3)
C71 0.026(4) 0.018(3) 0.012(6) 0.004(4) 0.006(4) 0.005(2)
C72 0.026(3) 0.012(3) 0.020(6) -0.008(4) 0.006(4) 0.006(2)
C73 0.037(4) 0.014(3) 0.014(5) -0.006(4) 0.002(4) 0.002(2)
C74 0.039(4) 0.018(3) 0.018(6) 0.006(5) 0.005(5) 0.005(3)
C75 0.031(3) 0.025(7) 0.027(7) 0.007(6) 0.012(5) 0.014(3)
C76 0.023(5) 0.022(4) 0.034(7) 0.012(6) 0.002(5) 0.004(4)
C77 0.026(5) 0.020(4) 0.027(7) 0.005(5) -0.003(5) -0.001(4)
[truncated: 2,832,060 more chars]
